# Supplementary material for: Quantifying the hydrogen-bond propensity of drugs and its relationship with Lipinski's rule of five
Source: Royal Society of Chemistry journal article supplement (doi:10.1039/d3nj05476d), 2024-01-01
Supplement: d3nj05476d1.pdf [file d3nj05476d1.pdf]

## Quantifying the hydrogen-bond propensity of drugs and relationship to Lipinski's rule of five

Mambatta Haritha<sup>a,b</sup> Manikandan Sreerag<sup>a</sup> and Cherumuttathu H. Suresh<sup>\*a,b</sup>

<sup>a</sup>Chemical Sciences and Technology Division, CSIR– National Institute for Interdisciplinary Science and Technology, Thiruvananthapuram Kerala, 695 019, India.

<sup>b</sup>Academy of Scientific and Innovative Research (AcSIR), Ghaziabad 201002, India.  
Tel: +91-471-2515472, E-mail: sureshch@niist.res.in, sureshch@gmail.com

### Supporting Information

#### Table of Contents

|                                                                                                                                                                                    |      |
|------------------------------------------------------------------------------------------------------------------------------------------------------------------------------------|------|
| 1. Table S1. MESP parameters of interacting atoms in the chemical motifs and interaction energies of the corresponding complexes.                                                  | –S2  |
| 2. Table S2. Cartesian coordinates of optimized geometry of rings in drugs at M06L/6-311++G(d,p) level. Atomic number followed by X, Y, Z coordinates in Å.                        | –S4  |
| 3. Table S3. Cartesian coordinates of optimized geometry of drugs at M06L/6-311++G(d,p) level. Atomic number followed by X, Y, Z coordinates in Å.                                 | –S6  |
| 4. Table S4. Cartesian coordinates of optimized geometry of FDA approved drugs...H <sub>2</sub> O at M06L/6-311++G(d,p) level. Atomic number followed by X, Y, Z coordinates in Å. | –S16 |
| 5. The Python script for calculating the four Lipinski's parameters with description.                                                                                              | –S65 |
| 6. Table S5. Cartesian coordinates of optimized geometry of 193 FDA approved oral drugs at M06L/6-311++G(d,p) level. Atomic number followed by X, Y, Z coordinates in Å.           | –S66 |

1. **Table S1.** MESP parameters of interacting atoms in the chemical motifs and interaction energies of the corresponding complexes.

| Sl no | Name of the ring in drug                              | Motif              | $E_{int}$ | No of interactions | $\Delta V_{n(H)}$ | $\Delta V_{n(A)}$ |
|-------|-------------------------------------------------------|--------------------|-----------|--------------------|-------------------|-------------------|
| 1     | 3,7-dihydro-1H-purine-2,6-dione                       | CO <sup>-</sup> HN | -9.8      | 6                  | 7.1               | -73.0             |
|       |                                                       | CO <sup>-</sup> HN | -9.9      |                    | 7.1               | -75.8             |
|       |                                                       | CO <sup>-</sup> HN | -10.9     |                    | 16.5              | -75.8             |
|       |                                                       | CN <sup>-</sup> HN | -10.2     |                    | 16.5              | -26.8             |
|       |                                                       | CN <sup>-</sup> HC | -6.1      |                    | -30.3             | -26.8             |
|       |                                                       | CO <sup>-</sup> HN | -14.5     |                    | 30.8              | -73.0             |
| 2     | 2-amino-1H-purin-6(9H)-one                            | CN <sup>-</sup> HN | -10.1     | 5                  | 16.7              | -34.8             |
|       |                                                       | CN <sup>-</sup> HN | -9.9      |                    | 3.1               | -34.8             |
|       |                                                       | CO <sup>-</sup> HC | -12.7     |                    | 9.8               | -86.6             |
|       |                                                       | CO <sup>-</sup> NC | -9.1      |                    | -                 | -131.2            |
|       |                                                       | CH <sup>-</sup> NC | -7.8      |                    | -47.4             | -44.6             |
| 3     | 1,9-dihydro-6H-purin-6-one                            | CO <sup>-</sup> HN | -12.2     | 5                  | 12.6              | -82.4             |
|       |                                                       | CH <sup>-</sup> NC | -7.5      |                    | -41.0             | -38.2             |
|       |                                                       | CO <sup>-</sup> NC | -8.5      |                    | -                 | -120.5            |
|       |                                                       | CN <sup>-</sup> HN | -11.0     |                    | 23.3              | -25.8             |
|       |                                                       | CN <sup>-</sup> HC | -5.9      |                    | -39.3             | -25.8             |
| 4     | 1H-purin-6-one                                        | CN <sup>-</sup> HN | -11.0     | 5                  | 9.2               | -30.3             |
|       |                                                       | CN <sup>-</sup> HC | -5.9      |                    | -61.7             | -30.3             |
|       |                                                       | CO <sup>-</sup> HN | -12.2     |                    | 4.2               | -61.0             |
|       |                                                       | CO <sup>-</sup> ON | -8.5      |                    | -                 | -87.5             |
|       |                                                       | CN <sup>-</sup> HC | -7.5      |                    | -35.6             | -26.6             |
| 5     | 1,5-naphthyridin-4(1H)-one                            | CN <sup>-</sup> HC | -9.6      | 2                  | -                 | -132.5            |
|       |                                                       | CO <sup>-</sup> HC | -9.0      |                    | -62.5             | -95.6             |
| 6     | 7H-purine                                             | CN <sup>-</sup> HC | -6.6      | 5                  | -70.8             | -36.3             |
|       |                                                       | CN <sup>-</sup> HC | -5.9      |                    | -70.8             | -35.0             |
|       |                                                       | CN <sup>-</sup> HC | -7.1      |                    | -51.4             | -35.0             |
|       |                                                       | CN <sup>-</sup> HC | -7.4      |                    | -33.8             | -36.6             |
|       |                                                       | CN <sup>-</sup> NC | -7.6      |                    | -                 | -72.8             |
| 7     | 1,8-naphthyridin-4(1H)-one                            | CO <sup>-</sup> HC | -8.7      | 3                  | -60.9             | -91.3             |
|       |                                                       | CN <sup>-</sup> HN | -11.3     |                    | 15.0              | -29.5             |
|       |                                                       | CO <sup>-</sup> HC | -8.7      |                    | -56.9             | -91.3             |
| 8     | [1,2,4]triazolo[4,3-a]pyridin-3(2H)one                | CN <sup>-</sup> HN | -8.0      | 4                  | 10.9              | -21.7             |
|       |                                                       | CN <sup>-</sup> HC | -7.0      |                    | -49.7             | -21.7             |
|       |                                                       | CO <sup>-</sup> HN | -10.7     |                    | 10.9              | -80.9             |
|       |                                                       | CO <sup>-</sup> HC | -8.7      |                    | -40.9             | -80.9             |
| 9     | 5,11-dihydro-6H-pyrido[2,3-b][1,4]benzodiazepin-6-one | CN <sup>-</sup> HN | -10.4     | 3                  | -7.4              | -34.8             |
|       |                                                       | CO <sup>-</sup> HC | -6.7      |                    | -68.4             | -80.9             |
|       |                                                       | CO <sup>-</sup> HN | -11.0     |                    | -1.9              | -80.9             |
| 10    | phthalazin-1(2H)-one                                  | CN <sup>-</sup> HC | -5.3      | 4                  | -53.6             | -6.5              |
|       |                                                       | CN <sup>-</sup> HN | -10.5     |                    | 1.3               | -6.5              |

|    |                                                |                     |       |   |       |       |
|----|------------------------------------------------|---------------------|-------|---|-------|-------|
|    |                                                | CO <sup>-</sup> HN  | -10.5 |   | 1.3   | -82.3 |
|    |                                                | CO <sup>-</sup> HC  | -7.8  |   | -59.5 | -82.3 |
| 11 | 9H-purine                                      | CN <sup>-</sup> HC  | -6.4  | 5 | -67.1 | -36.4 |
|    |                                                | CN <sup>-</sup> HC  | -6.5  |   | -59.6 | -36.4 |
|    |                                                | CN <sup>-</sup> HC  | -6.7  |   | -59.6 | -33.3 |
|    |                                                | CN <sup>-</sup> HC  | -6.8  |   | -35.2 | -33.3 |
|    |                                                | CN <sup>-</sup> HN  | -11.7 |   | 25.8  | -28.7 |
| 12 | 9H-purin-6-amine                               | CN <sup>-</sup> HN  | -12.0 | 4 | 18.4  | -42.5 |
|    |                                                | CN <sup>-</sup> HC  | -6.3  |   | -41.7 | -37.9 |
|    |                                                | CN <sup>-</sup> HC  | -11.7 |   | -5.7  | -37.9 |
|    |                                                | CN <sup>-</sup> HN  | -10.9 |   | -6.7  | -45.7 |
| 13 | 1H-purin                                       | CN <sup>-</sup> NC  | -7.9  | 3 | -     | -80.5 |
|    |                                                | CN <sup>-</sup> HC  | -7.5  |   | -32.6 | -31.6 |
|    |                                                | CN <sup>-</sup> HC  | -10.5 |   | -41.4 | -28.2 |
| 14 | 2-Fluoropyridine                               | CN <sup>-</sup> FC  | -5.9  | 2 | -     | -71.7 |
|    |                                                | CF <sup>-</sup> HC  | -4.0  |   | -49.4 | -40.5 |
| 15 | 3,6,7,8-tetrahydroimidazo[4,5-d][1,3]diazepine | CN <sup>-</sup> HC  | -8.7  | 2 | -75.5 | -58.7 |
|    |                                                | CN <sup>-</sup> HN  | -11.1 |   | 1.4   | -47.9 |
| 16 | quinazoline                                    | CN <sup>-</sup> HC  | -6.8  | 3 | -57.2 | -34.7 |
|    |                                                | CN <sup>-</sup> HC  | -6.1  |   | -68.3 | -34.7 |
|    |                                                | CN <sup>-</sup> HC  | -7.4  |   | -60.0 | -35.8 |
| 17 | 2,3-dihydro-1,3,4-thiadiazole                  | CN <sup>-</sup> HC  | -5.8  | 4 | -45.7 | -21.2 |
|    |                                                | CN <sup>-</sup> HN  | -7.2  |   | -15.8 | -21.2 |
|    |                                                | CS <sup>-</sup> HC  | -3.0  |   | -45.7 | -18.3 |
|    |                                                | CS <sup>-</sup> HC  | -4.1  |   | -62.9 | -18.3 |
| 18 | 2H-benzo[d][1,2,3]triazole                     | CN <sup>-</sup> HC  | -5.9  | 4 | -60.7 | -15.6 |
|    |                                                | CN <sup>-</sup> HN  | -8.7  |   | 21.6  | -15.6 |
|    |                                                | CN <sup>-</sup> HN  | -8.7  |   | 21.6  | -15.7 |
|    |                                                | CN <sup>-</sup> HC  | -5.9  |   | -60.7 | -15.7 |
| 19 | chlorobenzene                                  | CCl <sup>-</sup> HC | -3.5  | 2 | -59.1 | -28.4 |
|    |                                                | CCl <sup>-</sup> HC | -3.5  |   | -59.0 | -28.4 |
| 20 | 5-bromo-2,3-dihydro-1H-pyrrole                 | CBr <sup>-</sup> HC | -2.9  | 2 | -64.5 | -16.6 |
|    |                                                | CBr <sup>-</sup> HC | -5.9  |   | -19.3 | -16.6 |

2. **Table S2.** Cartesian coordinates of optimized geometry of rings in drugs at M06L/6-311++G(d,p) level. Atomic number followed by X, Y, Z coordinates in Å.

|                                                           |                                            |
|-----------------------------------------------------------|--------------------------------------------|
| 3,7-dihydro-1H-purin-2,6-dione (1)                        | 2-amino-1H-purin-6(9H)-one (2)             |
| 6 0.275 1.440 0.000                                       | 6 0.199 1.473 0.003                        |
| 6 -0.769 0.461 0.000                                      | 6 -0.853 0.499 0.007                       |
| 7 1.528 0.791 0.000                                       | 7 1.467 0.791 0.000                        |
| 1 2.337 1.398 0.000                                       | 6 -0.519 -0.852 -0.001                     |
| 6 -0.545 -0.897 0.000                                     | 6 1.670 -0.560 -0.001                      |
| 6 1.841 -0.571 0.000                                      | 7 2.971 -0.994 -0.075                      |
| 8 2.979 -0.984 0.000                                      | 7 0.699 -1.440 0.008                       |
| 7 0.730 -1.402 0.000                                      | 7 -2.218 0.675 0.007                       |
| 8 0.172 2.652 0.000                                       | 7 -1.719 -1.506 -0.003                     |
| 7 -2.140 0.582 0.000                                      | 6 -2.701 -0.537 0.001                      |
| 7 -1.698 -1.608 0.000                                     | 1 -1.840 -2.508 -0.010                     |
| 6 -2.640 -0.677 0.000                                     | 1 -3.749 -0.798 -0.001                     |
| 1 -3.702 -0.874 0.000                                     | 8 0.179 2.684 -0.004                       |
| 1 -2.652 1.452 -0.001                                     | 1 2.261 1.415 -0.064                       |
| 1 0.898 -2.397 0.000                                      | 1 3.668 -0.428 0.384                       |
|                                                           | 1 3.064 -1.980 0.120                       |
| 1,9-dihydro-6H-purin-6-one (3)                            | 1H-purin-6-one (4)                         |
| 6 -1.159 -0.899 0.000                                     | 7 0.142 -1.880 0.000                       |
| 6 0.243 -0.573 0.000                                      | 6 -0.629 -0.765 0.000                      |
| 7 -1.912 0.324 -0.001                                     | 6 1.410 -1.587 0.000                       |
| 1 -2.916 0.193 0.000                                      | 1 2.142 -2.391 0.001                       |
| 6 0.629 0.765 0.000                                       | 6 -0.243 0.573 0.000                       |
| 6 -1.410 1.587 0.000                                      | 7 1.912 -0.324 0.000                       |
| 1 -2.142 2.391 0.000                                      | 1 2.916 -0.193 0.000                       |
| 7 -0.142 1.880 0.000                                      | 6 1.159 0.899 0.000                        |
| 8 -1.733 -1.965 0.001                                     | 7 -1.996 -0.735 0.000                      |
| 7 1.335 -1.403 -0.001                                     | 7 -1.335 1.403 0.000                       |
| 7 1.996 0.735 0.000                                       | 6 -2.360 0.591 -0.001                      |
| 6 2.360 -0.591 0.000                                      | 1 -2.601 -1.542 0.000                      |
| 1 2.601 1.542 0.000                                       | 8 1.733 1.966 0.000                        |
| 1 3.398 -0.891 0.000                                      | 1 -3.398 0.891 0.000                       |
| 1,5-naphthyridin-4(1H)-one (5)                            | 7H-purine (6)                              |
| 6 1.357 0.975 0.000                                       | 7 -0.912 -1.417 0.000                      |
| 6 -0.061 0.508 0.000                                      | 6 0.219 -0.712 0.000                       |
| 6 2.335 -0.104 0.000                                      | 6 -2.009 -0.665 0.000                      |
| 1 3.384 0.164 0.000                                       | 1 -2.956 -1.199 0.000                      |
| 6 -0.360 -0.873 0.000                                     | 6 0.233 0.700 0.000                        |
| 6 1.974 -1.408 0.000                                      | 7 -2.107 0.677 0.000                       |
| 1 2.694 -2.219 0.000                                      | 6 -0.975 1.377 0.000                       |
| 7 0.664 -1.796 0.000                                      | 7 1.503 -1.212 0.000                       |
| 1 0.435 -2.778 0.002                                      | 7 1.566 1.038 0.000                        |
| 8 1.663 2.158 0.000                                       | 6 2.259 -0.147 0.000                       |
| 7 -1.031 1.433 0.000                                      | 1 -1.053 2.463 0.000                       |
| 6 -1.698 -1.281 0.000                                     | 1 1.964 1.965 0.000                        |
| 6 -2.291 1.033 0.000                                      | 1 3.341 -0.155 0.000                       |
| 6 -2.678 -0.314 0.000                                     |                                            |
| 1 -3.047 1.816 0.000                                      |                                            |
| 1 -3.728 -0.586 0.000                                     |                                            |
| 1 -1.947 -2.339 0.000                                     |                                            |
| 1,8-naphthyridin-4(1H)-one (7)                            | [1,2,4]triazolo[4,3-a]pyridin-3(2H)one (8) |
| 6 -1.376 0.959 0.000                                      | 6 0.695 -1.441 0.000                       |
| 6 0.036 0.514 0.000                                       | 7 -0.176 -0.385 0.000                      |
| 6 -2.337 -0.129 0.000                                     | 6 2.026 -1.181 0.000                       |
| 1 -3.391 0.114 0.000                                      | 6 0.225 0.951 0.000                        |
| 6 0.380 -0.849 0.000                                      | 6 2.487 0.173 0.000                        |
| 6 -1.942 -1.426 0.000                                     | 1 3.555 0.363 0.000                        |
| 1 -2.646 -2.251 0.000                                     | 6 1.617 1.222 0.000                        |
| 7 -0.627 -1.788 0.000                                     | 6 -1.588 -0.430 0.000                      |
| 1 -0.345 -2.758 0.000                                     | 7 -0.804 1.767 0.000                       |
| 8 -1.681 2.149 0.000                                      | 7 -1.881 0.910 0.000                       |
| 6 1.092 1.426 0.000                                       | 1 -2.813 1.290 0.000                       |
| 7 1.630 -1.325 0.000                                      | 1 0.235 -2.422 0.000                       |
| 6 2.393 0.960 0.000                                       | 1 1.945 2.254 0.000                        |
| 6 2.604 -0.422 0.000                                      | 1 2.730 -2.003 0.000                       |
| 1 0.848 2.485 0.000                                       | 8 -2.299 -1.412 0.000                      |
| 1 3.239 1.638 0.000                                       |                                            |
| 1 3.616 -0.823 0.000                                      |                                            |
| 5,11-dihydro-6H-pyrido[2,3-b][1,4]benzodiazepin-6-one (9) | phthalazin-1(2H)-one (10)                  |
| 6 3.518 -1.264 0.303                                      | 6 -1.342 -0.907 0.000                      |
| 7 2.306 -1.640 -0.113                                     | 6 0.058 -0.480 0.000                       |
| 6 3.842 0.053 0.584                                       | 7 -2.237 0.162 -0.001                      |
| 1 4.832 0.322 0.934                                       | 6 0.361 0.897 0.000                        |
| 6 1.374 -0.709 -0.292                                     | 7 -1.981 1.486 0.000                       |
| 6 2.864 1.022 0.391                                       | 6 -0.729 1.829 0.000                       |
| 1 3.078 2.072 0.573                                       | 6 1.084 -1.428 0.000                       |
| 6 1.606 0.658 -0.072                                      | 6 1.707 1.300 0.000                        |
| 1 4.251 -2.058 0.412                                      | 6 2.403 -1.014 0.000                       |
| 7 0.156 -1.186 -0.780                                     | 6 2.713 0.353 0.000                        |

|                                                            |        |        |        |                                        |        |        |        |
|------------------------------------------------------------|--------|--------|--------|----------------------------------------|--------|--------|--------|
| 7                                                          | 0.675  | 1.651  | -0.405 | 1                                      | 3.203  | -1.746 | 0.000  |
| 6                                                          | -1.107 | -0.826 | -0.299 | 1                                      | 1.945  | 2.360  | 0.000  |
| 6                                                          | -0.697 | 1.723  | -0.226 | 1                                      | 3.751  | 0.669  | 0.000  |
| 1                                                          | 0.240  | -2.184 | -0.940 | 1                                      | 0.814  | -2.479 | 0.000  |
| 1                                                          | 1.060  | 2.582  | -0.504 | 8                                      | -1.745 | -2.058 | 0.001  |
| 8                                                          | -1.225 | 2.821  | -0.288 | 1                                      | -3.221 | -0.076 | -0.001 |
| 6                                                          | -2.051 | -1.856 | -0.173 | 1                                      | -0.541 | 2.899  | 0.001  |
| 6                                                          | -1.496 | 0.492  | 0.005  |                                        |        |        |        |
| 6                                                          | -3.337 | -1.605 | 0.270  |                                        |        |        |        |
| 6                                                          | -2.803 | 0.717  | 0.459  |                                        |        |        |        |
| 1                                                          | -4.039 | -2.427 | 0.360  |                                        |        |        |        |
| 1                                                          | -3.077 | 1.744  | 0.670  |                                        |        |        |        |
| 6                                                          | -3.719 | -0.308 | 0.607  |                                        |        |        |        |
| 1                                                          | -4.721 | -0.102 | 0.966  |                                        |        |        |        |
| 1                                                          | -1.751 | -2.869 | -0.426 |                                        |        |        |        |
| <b>9H-purine (11)</b>                                      |        |        |        | <b>9H-purin-6-amine (12)</b>           |        |        |        |
| 6                                                          | 0.990  | 1.374  | 0.000  | 6                                      | 1.222  | -0.605 | -0.004 |
| 6                                                          | -0.246 | 0.739  | 0.000  | 6                                      | -0.179 | -0.518 | -0.004 |
| 7                                                          | 2.112  | 0.653  | 0.000  | 7                                      | 1.944  | 0.526  | 0.006  |
| 6                                                          | -0.202 | -0.668 | 0.000  | 6                                      | -0.708 | 0.773  | -0.004 |
| 6                                                          | 2.000  | -0.683 | 0.000  | 6                                      | 1.287  | 1.692  | 0.004  |
| 1                                                          | 2.936  | -1.237 | 0.000  | 1                                      | 1.919  | 2.578  | 0.011  |
| 7                                                          | 0.887  | -1.422 | 0.000  | 7                                      | -0.027 | 1.920  | -0.001 |
| 7                                                          | -1.551 | 1.193  | 0.000  | 7                                      | -1.173 | -1.476 | 0.001  |
| 7                                                          | -1.518 | -1.058 | 0.000  | 7                                      | -2.069 | 0.583  | 0.000  |
| 6                                                          | -2.263 | 0.099  | 0.000  | 6                                      | -2.278 | -0.776 | 0.004  |
| 1                                                          | -1.857 | -2.008 | -0.001 | 1                                      | -2.767 | 1.311  | 0.002  |
| 1                                                          | -3.345 | 0.064  | 0.000  | 1                                      | -3.277 | -1.190 | 0.009  |
| 1                                                          | 1.085  | 2.458  | 0.000  | 7                                      | 1.874  | -1.793 | -0.048 |
|                                                            |        |        |        | 1                                      | 2.862  | -1.785 | 0.145  |
|                                                            |        |        |        | 1                                      | 1.356  | -2.633 | 0.151  |
| <b>1H-purin (13)</b>                                       |        |        |        | <b>2-Fluoropyridine (14)</b>           |        |        |        |
| 6                                                          | -0.864 | 1.392  | 0.000  | 6                                      | 0.000  | 0.890  | 0.000  |
| 6                                                          | 0.331  | 0.733  | 0.000  | 7                                      | -1.189 | 0.341  | 0.000  |
| 7                                                          | -1.982 | 0.606  | 0.000  | 6                                      | 1.214  | 0.215  | 0.000  |
| 1                                                          | -2.891 | 1.046  | 0.000  | 1                                      | 2.149  | 0.761  | 0.000  |
| 6                                                          | 0.314  | -0.724 | 0.000  | 6                                      | -1.226 | -0.997 | 0.000  |
| 6                                                          | -1.925 | -0.763 | 0.000  | 6                                      | 1.153  | -1.170 | 0.000  |
| 1                                                          | -2.889 | -1.263 | 0.000  | 1                                      | -2.219 | -1.441 | 0.000  |
| 7                                                          | -0.825 | -1.455 | 0.000  | 1                                      | 2.067  | -1.754 | 0.000  |
| 1                                                          | -1.006 | 2.466  | 0.000  | 6                                      | -0.092 | -1.795 | 0.000  |
| 7                                                          | 1.620  | 1.161  | 0.000  | 1                                      | -0.180 | -2.875 | 0.000  |
| 7                                                          | 1.565  | -1.171 | 0.000  | 9                                      | 0.024  | 2.230  | 0.000  |
| 6                                                          | 2.274  | -0.005 | 0.000  |                                        |        |        |        |
| 1                                                          | 3.359  | -0.030 | 0.000  |                                        |        |        |        |
| <b>3,6,7,8-tetrahydroimidazo[4,5-d][1,3]diazepine (15)</b> |        |        |        | <b>Quinazoline (16)</b>                |        |        |        |
| 6                                                          | 0.538  | 0.666  | 0.004  | 6                                      | -1.212 | 1.402  | 0.000  |
| 6                                                          | 0.588  | -0.712 | 0.130  | 6                                      | 0.020  | 0.712  | 0.000  |
| 7                                                          | -0.426 | 1.642  | 0.030  | 6                                      | -2.388 | 0.695  | 0.000  |
| 6                                                          | -0.569 | -1.633 | 0.264  | 1                                      | -3.339 | 1.218  | 0.000  |
| 6                                                          | -1.678 | 1.362  | 0.109  | 6                                      | 0.040  | -0.711 | 0.000  |
| 6                                                          | -1.808 | -1.097 | -0.442 | 6                                      | -2.371 | -0.717 | 0.000  |
| 1                                                          | -0.301 | -2.600 | -0.173 | 1                                      | -3.313 | -1.258 | 0.001  |
| 1                                                          | -1.590 | -0.968 | -1.511 | 6                                      | -1.186 | -1.413 | 0.000  |
| 7                                                          | -2.320 | 0.152  | 0.120  | 1                                      | -1.157 | -2.497 | 0.000  |
| 6                                                          | 2.622  | -0.077 | -0.069 | 1                                      | -1.211 | 2.489  | 0.000  |
| 7                                                          | 1.862  | 1.047  | -0.116 | 6                                      | 1.284  | 1.343  | 0.000  |
| 7                                                          | 1.884  | -1.156 | 0.075  | 7                                      | 1.215  | -1.397 | 0.000  |
| 1                                                          | 2.165  | 2.004  | -0.215 | 7                                      | 2.419  | 0.682  | 0.000  |
| 1                                                          | 3.699  | -0.054 | -0.147 | 6                                      | 2.310  | -0.673 | 0.000  |
| 1                                                          | -3.325 | 0.226  | 0.133  | 1                                      | 1.343  | 2.434  | 0.000  |
| 1                                                          | -0.812 | -1.829 | 1.316  | 1                                      | 3.254  | -1.214 | 0.000  |
| 1                                                          | -2.623 | -1.821 | -0.369 |                                        |        |        |        |
| 1                                                          | -2.364 | 2.202  | 0.221  |                                        |        |        |        |
| <b>2,3-dihydro-1,3,4-thiadiazole (17)</b>                  |        |        |        | <b>2H-benzo[d][1,2,3]triazole (18)</b> |        |        |        |
| 6                                                          | 0.110  | -1.232 | 0.169  | 6                                      | 0.924  | 1.439  | 0.000  |
| 7                                                          | 1.297  | -0.482 | -0.251 | 6                                      | -0.281 | 0.712  | 0.000  |
| 7                                                          | 1.197  | 0.875  | 0.032  | 6                                      | 2.089  | 0.711  | 0.000  |
| 6                                                          | -0.024 | 1.236  | 0.098  | 6                                      | -0.281 | -0.712 | 0.000  |
| 16                                                         | -1.245 | -0.035 | -0.073 | 6                                      | 2.089  | -0.711 | 0.000  |
| 1                                                          | 0.142  | -1.556 | 1.221  | 1                                      | 3.043  | -1.228 | 0.000  |
| 1                                                          | 2.156  | -0.839 | 0.150  | 6                                      | 0.924  | -1.439 | 0.000  |
| 1                                                          | -0.311 | 2.273  | 0.206  | 7                                      | -1.562 | 1.143  | 0.000  |
| 1                                                          | -0.042 | -2.100 | -0.474 | 7                                      | -1.562 | -1.143 | 0.000  |
|                                                            |        |        |        | 7                                      | -2.229 | 0.000  | 0.000  |
|                                                            |        |        |        | 1                                      | 0.922  | 2.523  | 0.000  |
|                                                            |        |        |        | 1                                      | 0.923  | -2.523 | 0.000  |
|                                                            |        |        |        | 1                                      | 3.043  | 1.229  | 0.000  |
|                                                            |        |        |        | 1                                      | -3.239 | 0.000  | 0.000  |

| chlorobenzene (19) |        |        |       | 5-bromo-2,3-dihydro-1H-pyrrole (20) |        |        |        |
|--------------------|--------|--------|-------|-------------------------------------|--------|--------|--------|
| 6                  | -2.264 | 0.000  | 0.000 | 7                                   | -0.972 | -1.097 | -0.221 |
| 6                  | -1.566 | 1.203  | 0.000 | 6                                   | -2.364 | -0.775 | 0.144  |
| 6                  | -1.566 | -1.203 | 0.000 | 6                                   | -0.266 | 0.091  | -0.011 |
| 1                  | -2.104 | 2.146  | 0.000 | 6                                   | -2.463 | 0.740  | -0.088 |
| 1                  | -2.102 | -2.147 | 0.000 | 6                                   | -1.035 | 1.182  | 0.075  |
| 6                  | -0.175 | 1.212  | 0.000 | 1                                   | -2.544 | -1.004 | 1.204  |
| 6                  | -0.175 | -1.212 | 0.000 | 1                                   | -3.162 | 1.216  | 0.606  |
| 1                  | 0.378  | 2.144  | 0.000 | 1                                   | -3.066 | -1.357 | -0.456 |
| 1                  | 0.379  | -2.142 | 0.000 | 1                                   | -2.825 | 0.962  | -1.103 |
| 6                  | 0.505  | 0.000  | 0.000 | 1                                   | -0.685 | 2.202  | 0.102  |
| 17                 | 2.250  | 0.000  | 0.000 | 1                                   | -0.583 | -1.904 | 0.252  |
| 1                  | -3.349 | 0.001  | 0.000 | 35                                  | 1.613  | 0.004  | 0.006  |

3. **Table S3.** Cartesian coordinates of optimized geometry of FDA approved drugs at M06L/6-311++G(d,p) level. Atomic number followed by X, Y, Z coordinates in Å.

| cefditoren pivoxil |        |        |        | Amlodipine |        |        |        |
|--------------------|--------|--------|--------|------------|--------|--------|--------|
| 16                 | 0.883  | -2.629 | 1.182  | 17         | 2.759  | -2.612 | -0.739 |
| 16                 | -3.926 | -2.873 | -1.598 | 8          | -3.074 | 1.202  | 0.493  |
| 16                 | 7.872  | 1.276  | -2.002 | 8          | -2.305 | -0.927 | -1.370 |
| 8                  | 0.042  | 1.393  | -0.258 | 8          | 3.831  | 0.341  | -0.650 |
| 8                  | -2.792 | 0.360  | -1.105 | 8          | -0.311 | -1.950 | -1.561 |
| 8                  | -3.468 | 0.415  | 1.056  | 8          | 3.992  | 2.558  | -0.276 |
| 8                  | 4.007  | -1.136 | -1.761 | 7          | -0.252 | 2.554  | -0.149 |
| 8                  | -3.225 | 2.602  | -0.840 | 7          | -6.511 | 0.388  | 1.413  |
| 8                  | 4.027  | -1.296 | 2.034  | 6          | 1.166  | 0.138  | -0.533 |
| 8                  | -5.197 | 2.968  | 0.214  | 6          | -0.324 | 0.282  | -0.806 |
| 7                  | -0.552 | -0.905 | -0.322 | 6          | 1.841  | 1.491  | -0.377 |
| 7                  | 2.669  | -0.403 | -0.081 | 6          | -0.971 | 1.450  | -0.562 |
| 7                  | 5.186  | -0.723 | 1.512  | 6          | 1.127  | 2.623  | -0.141 |
| 7                  | 7.326  | 0.538  | 0.423  | 6          | 1.381  | -0.724 | 0.707  |
| 7                  | -5.864 | -1.232 | -2.017 | 6          | -2.445 | 1.714  | -0.659 |
| 7                  | 9.405  | 1.628  | 0.234  | 6          | -0.951 | -0.958 | -1.279 |
| 6                  | 0.553  | -1.846 | -0.427 | 6          | 1.673  | 3.988  | 0.121  |
| 6                  | 1.465  | -0.646 | -0.804 | 6          | 3.301  | 1.566  | -0.420 |
| 6                  | 0.257  | 0.229  | -0.442 | 6          | 2.068  | -1.942 | 0.717  |
| 6                  | -1.748 | -1.116 | 0.359  | 6          | 0.855  | -0.281 | 1.925  |
| 6                  | -0.832 | -3.238 | 1.333  | 6          | 2.228  | -2.677 | 1.889  |
| 6                  | -1.932 | -2.234 | 1.104  | 6          | 1.004  | -1.001 | 3.102  |
| 6                  | -2.769 | -0.040 | 0.189  | 6          | 1.698  | -2.206 | 3.082  |
| 6                  | -3.208 | -2.585 | 1.719  | 6          | -4.481 | 1.196  | 0.369  |
| 6                  | 3.884  | -0.710 | -0.625 | 6          | -2.903 | -2.157 | -1.818 |
| 6                  | 5.081  | -0.431 | 0.255  | 6          | -5.060 | 0.453  | 1.552  |
| 6                  | -4.428 | -2.551 | 1.154  | 6          | 5.254  | 0.288  | -0.693 |
| 6                  | -3.706 | 1.409  | -1.403 | 6          | -4.396 | -1.986 | -1.757 |
| 6                  | -3.252 | 4.295  | 0.827  | 1          | 1.617  | -0.395 | -1.374 |
| 6                  | -4.763 | -2.217 | -0.221 | 1          | -0.763 | 3.411  | 0.000  |
| 6                  | 6.246  | 0.198  | -0.364 | 1          | -2.617 | 2.803  | -0.736 |
| 6                  | -4.037 | 3.243  | 0.063  | 1          | -2.863 | 1.255  | -1.563 |
| 6                  | -4.235 | 5.227  | 1.529  | 1          | 2.367  | 3.985  | 0.961  |
| 6                  | -2.403 | 3.544  | 1.865  | 1          | 2.244  | 4.355  | -0.733 |
| 6                  | -2.334 | 5.086  | -0.108 | 1          | 0.863  | 4.693  | 0.331  |
| 6                  | -5.763 | -1.372 | -0.654 | 1          | 0.307  | 0.658  | 1.934  |
| 6                  | 6.361  | 0.509  | -1.694 | 1          | 2.767  | -3.617 | 1.853  |
| 6                  | -6.668 | -0.589 | 0.231  | 1          | 0.581  | -0.625 | 4.027  |
| 6                  | 8.247  | 1.104  | -0.289 | 1          | 1.826  | -2.785 | 3.991  |
| 6                  | -4.975 | -1.957 | -2.625 | 1          | -4.767 | 0.695  | -0.572 |
| 6                  | 4.268  | -1.656 | 3.390  | 1          | -4.883 | 2.221  | 0.324  |
| 1                  | 0.396  | -2.610 | -1.194 | 1          | -2.551 | -2.973 | -1.179 |
| 1                  | 1.703  | -0.646 | -1.870 | 1          | -2.551 | -2.375 | -2.832 |
| 1                  | -0.962 | -4.100 | 0.667  | 1          | -4.822 | 0.999  | 2.470  |
| 1                  | -0.916 | -3.631 | 2.351  | 1          | -4.555 | -0.524 | 1.629  |
| 1                  | 2.619  | -0.241 | 0.916  | 1          | 5.642  | 0.905  | -1.507 |
| 1                  | -3.145 | -2.934 | 2.749  | 1          | 5.683  | 0.642  | 0.246  |
| 1                  | -5.278 | -2.778 | 1.795  | 1          | 5.503  | -0.759 | -0.856 |
| 1                  | -4.703 | 1.180  | -1.023 | 1          | -4.728 | -1.794 | -0.733 |
| 1                  | -3.696 | 1.490  | -2.489 | 1          | -4.729 | -1.157 | -2.387 |
| 1                  | -3.688 | 5.964  | 2.122  | 1          | -4.893 | -2.894 | -2.107 |
| 1                  | -4.859 | 5.765  | 0.811  | 1          | -6.760 | -0.257 | 0.668  |
| 1                  | -4.901 | 4.674  | 2.194  | 1          | -6.925 | 0.008  | 2.257  |
| 1                  | -1.845 | 4.267  | 2.466  |            |        |        |        |
| 1                  | -1.687 | 2.874  | 1.383  |            |        |        |        |
| 1                  | -3.030 | 2.952  | 2.537  |            |        |        |        |
| 1                  | -1.810 | 5.857  | 0.465  |            |        |        |        |
| 1                  | -2.898 | 5.588  | -0.899 |            |        |        |        |
| 1                  | -1.586 | 4.444  | -0.576 |            |        |        |        |
| 1                  | 5.670  | 0.297  | -2.493 |            |        |        |        |
| 1                  | -6.449 | 0.482  | 0.170  |            |        |        |        |
| 1                  | -7.710 | -0.724 | -0.066 |            |        |        |        |
| 1                  | -6.554 | -0.878 | 1.277  |            |        |        |        |

|    |             |        |        |    |            |        |        |
|----|-------------|--------|--------|----|------------|--------|--------|
| 1  | -4.874      | -2.016 | -3.703 |    |            |        |        |
| 1  | 5.057       | -2.409 | 3.455  |    |            |        |        |
| 1  | 4.548       | -0.780 | 3.981  |    |            |        |        |
| 1  | 3.326       | -2.068 | 3.751  |    |            |        |        |
| 1  | 9.600       | 1.281  | 1.163  |    |            |        |        |
| 1  | 10.214      | 1.613  | -0.369 |    |            |        |        |
|    | Balsalazide |        |        |    | Acyclovir  |        |        |
| 8  | 4.988       | -1.999 | 0.786  | 8  | 2.351      | 0.128  | -0.040 |
| 8  | -7.445      | -0.628 | -0.813 | 8  | -3.927     | -1.539 | 0.832  |
| 8  | 7.312       | 1.574  | -2.207 | 8  | 5.008      | -0.557 | 0.883  |
| 8  | 5.847       | 2.395  | -0.716 | 7  | 0.312      | -0.667 | -0.759 |
| 8  | -5.668      | 2.750  | 0.912  | 7  | -1.048     | -2.334 | -0.112 |
| 8  | -7.607      | 1.838  | 0.241  | 7  | -1.102     | 1.256  | -0.386 |
| 7  | 4.910       | 0.252  | 1.045  | 7  | -3.220     | 0.600  | 0.417  |
| 7  | -1.271      | -1.265 | -0.160 | 7  | -2.746     | 2.847  | -0.014 |
| 7  | -1.995      | -0.279 | 0.157  | 6  | -0.862     | -0.074 | -0.369 |
| 6  | 6.351       | 0.360  | 1.155  | 6  | 1.509      | 0.009  | -1.157 |
| 6  | 2.856       | -0.962 | 0.581  | 6  | -1.689     | -1.122 | 0.018  |
| 6  | 7.048       | 0.367  | -0.196 | 6  | 0.134      | -2.026 | -0.565 |
| 6  | 4.333       | -0.964 | 0.803  | 6  | -3.019     | -0.827 | 0.461  |
| 6  | 2.288       | -2.110 | 0.024  | 6  | 3.538      | 0.831  | -0.349 |
| 6  | 2.024       | 0.116  | 0.917  | 6  | -2.316     | 1.541  | 0.016  |
| 6  | 0.100       | -1.092 | 0.119  | 6  | 4.473      | 0.752  | 0.825  |
| 6  | 0.925       | -2.173 | -0.211 | 1  | 1.225      | 0.995  | -1.552 |
| 6  | 0.661       | 0.058  | 0.692  | 1  | 2.004      | -0.567 | -1.954 |
| 6  | -3.361      | -0.447 | -0.120 | 1  | 0.933      | -2.722 | -0.783 |
| 6  | -5.567      | 0.591  | -0.002 | 1  | 3.309      | 1.884  | -0.579 |
| 6  | -4.188      | 0.621  | 0.218  | 1  | 4.026      | 0.393  | -1.235 |
| 6  | -6.121      | -0.567 | -0.587 | 1  | -4.160     | 0.883  | 0.663  |
| 6  | -3.929      | -1.593 | -0.701 | 1  | 5.267      | 1.504  | 0.692  |
| 6  | 6.653       | 1.550  | -1.030 | 1  | 3.919      | 1.006  | 1.739  |
| 6  | -5.285      | -1.643 | -0.927 | 1  | -1.986     | 3.503  | -0.120 |
| 6  | -6.411      | 1.745  | 0.373  | 1  | -3.414     | 3.122  | 0.691  |
| 1  | 6.581       | 1.274  | 1.708  | 1  | 5.429      | -0.677 | 1.736  |
| 1  | 6.703       | -0.491 | 1.740  |    |            |        |        |
| 1  | 6.814       | -0.549 | -0.750 |    |            |        |        |
| 1  | 8.137       | 0.369  | -0.083 |    |            |        |        |
| 1  | 4.424       | 1.092  | 0.767  |    |            |        |        |
| 1  | 2.942       | -2.941 | -0.213 |    |            |        |        |
| 1  | 2.440       | 1.002  | 1.389  |    |            |        |        |
| 1  | 0.467       | -3.054 | -0.649 |    |            |        |        |
| 1  | 0.010       | 0.883  | 0.957  |    |            |        |        |
| 1  | -3.739      | 1.499  | 0.666  |    |            |        |        |
| 1  | -3.284      | -2.423 | -0.964 |    |            |        |        |
| 1  | -5.734      | -2.526 | -1.376 |    |            |        |        |
| 1  | -7.648      | -1.482 | -1.212 |    |            |        |        |
| 1  | 7.000       | 2.354  | -2.686 |    |            |        |        |
| 1  | -6.297      | 3.452  | 1.124  |    |            |        |        |
|    | Cefprozil   |        |        |    | Bumetanide |        |        |
| 16 | 0.157       | 0.604  | -1.346 | 16 | 3.183      | -1.019 | -0.703 |
| 8  | 0.908       | -2.034 | 2.011  | 8  | 0.216      | -1.367 | -0.849 |
| 8  | -2.712      | -3.029 | -1.118 | 8  | 2.997      | -1.434 | -2.080 |
| 8  | 4.073       | 0.057  | 1.999  | 8  | 4.449      | -0.501 | -0.219 |
| 8  | 4.112       | -2.040 | 1.177  | 8  | 0.808      | 4.651  | 0.921  |
| 8  | -3.169      | 4.187  | 0.856  | 8  | 2.991      | 4.118  | 0.848  |
| 7  | 1.675       | -1.249 | -0.095 | 7  | -1.728     | 0.517  | -0.303 |
| 7  | -1.569      | -1.482 | 0.089  | 7  | 2.750      | -2.289 | 0.314  |
| 7  | -5.012      | -1.636 | -0.987 | 6  | -2.781     | 1.512  | -0.298 |
| 6  | 0.663       | -1.131 | -1.133 | 6  | -4.132     | 0.861  | -0.526 |
| 6  | -0.278      | -1.985 | -0.240 | 6  | -0.404     | 0.862  | -0.189 |
| 6  | 0.809       | -1.832 | 0.835  | 6  | 0.588      | -0.114 | -0.422 |
| 6  | 2.772       | -0.406 | 0.078  | 6  | 1.936      | 0.203  | -0.310 |
| 6  | 1.865       | 1.167  | -1.657 | 6  | -5.279     | 1.860  | -0.507 |
| 6  | 2.921       | 0.705  | -0.685 | 6  | 0.019      | 2.144  | 0.183  |
| 6  | -2.712      | -2.037 | -0.412 | 6  | 1.376      | 2.442  | 0.313  |
| 6  | 3.727       | -0.899 | 1.114  | 6  | 2.348      | 1.475  | 0.060  |
| 6  | -4.018      | -1.360 | 0.036  | 6  | -6.630     | 1.209  | -0.741 |
| 6  | 4.141       | 1.502  | -0.696 | 6  | -0.440     | -2.211 | 0.034  |
| 6  | -3.861      | 0.122  | 0.286  | 6  | 1.837      | 3.790  | 0.712  |
| 6  | 5.387       | 1.011  | -0.680 | 6  | -0.493     | -1.987 | 1.404  |
| 6  | -3.638      | 0.615  | 1.570  | 6  | -1.026     | -3.337 | -0.536 |
| 6  | -3.854      | 1.024  | -0.783 | 6  | -1.156     | -2.906 | 2.209  |
| 6  | 6.623       | 1.833  | -0.660 | 6  | -1.681     | -4.248 | 0.284  |
| 6  | -3.402      | 1.968  | 1.791  | 6  | -1.752     | -4.036 | 1.657  |
| 6  | -3.626      | 2.374  | -0.578 | 1  | -2.778     | 2.026  | 0.672  |
| 6  | -3.393      | 2.851  | 0.713  | 1  | -2.601     | 2.290  | -1.060 |
| 1  | 0.973       | -1.560 | -2.090 | 1  | -4.122     | 0.333  | -1.490 |
| 1  | -0.395      | -3.004 | -0.617 | 1  | -4.292     | 0.090  | 0.239  |
| 1  | -1.637      | -0.606 | 0.591  | 1  | -1.908     | -0.301 | -0.868 |
| 1  | 1.821       | 2.259  | -1.636 | 1  | -5.282     | 2.388  | 0.455  |
| 1  | 2.147       | 0.898  | -2.682 | 1  | -5.101     | 2.631  | -1.267 |
| 1  | -4.240      | -1.840 | 1.010  | 1  | -0.712     | 2.921  | 0.364  |
| 1  | 4.006       | 2.582  | -0.770 | 1  | 3.400      | 1.712  | 0.158  |
| 1  | 5.520       | -0.071 | -0.678 | 1  | -6.847     | 0.458  | 0.024  |

|               |        |        |        |            |         |        |        |
|---------------|--------|--------|--------|------------|---------|--------|--------|
| 1             | -5.945 | -1.579 | -0.597 | 1          | -7.441  | 1.940  | -0.723 |
| 1             | -4.869 | -2.583 | -1.328 | 1          | -6.665  | 0.703  | -1.711 |
| 1             | 4.670  | -0.369 | 2.632  | 1          | 3.556   | -2.560 | 0.867  |
| 1             | -3.646 | -0.070 | 2.416  | 1          | 2.405   | -3.072 | -0.232 |
| 1             | -4.040 | 0.644  | -1.783 | 1          | -0.013  | -1.113 | 1.830  |
| 1             | 6.402  | 2.902  | -0.700 | 1          | -0.956  | -3.482 | -1.609 |
| 1             | 7.285  | 1.587  | -1.496 | 1          | -1.200  | -2.736 | 3.280  |
| 1             | 7.203  | 1.646  | 0.251  | 1          | -2.138  | -5.127 | -0.157 |
| 1             | -3.233 | 2.339  | 2.798  | 1          | -2.266  | -4.748 | 2.294  |
| 1             | -3.619 | 3.076  | -1.404 | 1          | 1.213   | 5.492  | 1.172  |
| 1             | -3.017 | 4.380  | 1.786  |            |         |        |        |
| Didanosine    |        |        |        | Buspirone  |         |        |        |
| 8             | 2.353  | 0.287  | -1.012 | 8          | 3.658   | 2.120  | 1.297  |
| 8             | 4.092  | -1.722 | 0.000  | 8          | 3.417   | -1.870 | -0.869 |
| 8             | -4.028 | -1.800 | 0.457  | 7          | 3.560   | 0.090  | 0.276  |
| 7             | 0.062  | 0.072  | -0.587 | 7          | -2.679  | 0.717  | 0.075  |
| 7             | -1.013 | -1.888 | -0.320 | 7          | -5.466  | 0.152  | 0.131  |
| 7             | -1.761 | 1.630  | -0.174 | 7          | -7.157  | -1.381 | 0.528  |
| 7             | -3.750 | 0.475  | 0.337  | 7          | -7.604  | 0.715  | -0.562 |
| 6             | 1.160  | 1.005  | -0.949 | 6          | 6.352   | 0.194  | -0.226 |
| 6             | 1.366  | 2.074  | 0.109  | 6          | 6.741   | -0.578 | 1.047  |
| 6             | 2.232  | 1.334  | 1.120  | 6          | 7.725   | 0.425  | -0.863 |
| 6             | 3.073  | 0.410  | 0.243  | 6          | 7.850   | -1.538 | 0.600  |
| 6             | 3.298  | -0.944 | 0.869  | 6          | 8.487   | -0.888 | -0.651 |
| 6             | -1.238 | 0.379  | -0.273 | 6          | 5.598   | 1.483  | 0.055  |
| 6             | 0.123  | -1.304 | -0.617 | 6          | 5.461   | -0.658 | -1.128 |
| 6             | -1.877 | -0.849 | -0.102 | 6          | 4.210   | 1.288  | 0.608  |
| 6             | -3.271 | -0.877 | 0.249  | 6          | 4.076   | -0.893 | -0.582 |
| 6             | -3.025 | 1.606  | 0.133  | 6          | 2.207   | -0.117 | 0.807  |
| 1             | 0.939  | 1.401  | -1.945 | 6          | 1.135   | 0.436  | -0.116 |
| 1             | 0.431  | 2.466  | 0.506  | 6          | -0.262  | 0.216  | 0.442  |
| 1             | 1.918  | 2.900  | -0.348 | 6          | -1.338  | 0.740  | -0.494 |
| 1             | 2.844  | 1.998  | 1.732  | 6          | -3.166  | -0.641 | 0.286  |
| 1             | 1.605  | 0.744  | 1.799  | 6          | -3.611  | 1.427  | -0.792 |
| 1             | 4.044  | 0.852  | -0.011 | 6          | -4.539  | -0.635 | 0.927  |
| 1             | 2.324  | -1.417 | 1.067  | 6          | -4.993  | 1.492  | -0.176 |
| 1             | 3.791  | -0.787 | 1.842  | 6          | -6.787  | -0.180 | 0.036  |
| 1             | 1.043  | -1.803 | -0.881 | 6          | -8.436  | -1.701 | 0.378  |
| 1             | 4.201  | -2.594 | 0.386  | 6          | -8.873  | 0.347  | -0.688 |
| 1             | -3.565 | 2.543  | 0.238  | 6          | -9.366  | -0.871 | -0.236 |
| 1             | -4.731 | 0.554  | 0.573  | 1          | 5.896   | -1.090 | 1.520  |
|               |        |        |        | 1          | 7.126   | 0.137  | 1.783  |
|               |        |        |        | 1          | 8.222   | 1.246  | -0.331 |
|               |        |        |        | 1          | 7.658   | 0.725  | -1.914 |
|               |        |        |        | 1          | 7.435   | -2.520 | 0.354  |
|               |        |        |        | 1          | 8.578   | -1.710 | 1.396  |
|               |        |        |        | 1          | 9.560   | -0.719 | -0.534 |
|               |        |        |        | 1          | 8.378   | -1.541 | -1.522 |
|               |        |        |        | 1          | 5.493   | 2.064  | -0.873 |
|               |        |        |        | 1          | 6.133   | 2.128  | 0.757  |
|               |        |        |        | 1          | 5.887   | -1.642 | -1.336 |
|               |        |        |        | 1          | 5.344   | -0.166 | -2.104 |
|               |        |        |        | 1          | 2.167   | 0.374  | 1.780  |
|               |        |        |        | 1          | 2.078   | -1.192 | 0.943  |
|               |        |        |        | 1          | 1.226   | -0.044 | -1.098 |
|               |        |        |        | 1          | 1.312   | 1.508  | -0.268 |
|               |        |        |        | 1          | -0.405  | -0.855 | 0.629  |
|               |        |        |        | 1          | -0.365  | 0.714  | 1.414  |
|               |        |        |        | 1          | -1.301  | 0.179  | -1.452 |
|               |        |        |        | 1          | -1.112  | 1.783  | -0.746 |
|               |        |        |        | 1          | -2.475  | -1.174 | 0.945  |
|               |        |        |        | 1          | -3.206  | -1.199 | -0.672 |
|               |        |        |        | 1          | -3.676  | 0.943  | -1.788 |
|               |        |        |        | 1          | -3.235  | 2.444  | -0.949 |
|               |        |        |        | 1          | -4.930  | -1.646 | 1.018  |
|               |        |        |        | 1          | -4.467  | -0.207 | 1.939  |
|               |        |        |        | 1          | -4.955  | 2.091  | 0.747  |
|               |        |        |        | 1          | -5.702  | 1.964  | -0.854 |
|               |        |        |        | 1          | -8.731  | -2.672 | 0.775  |
|               |        |        |        | 1          | -9.529  | 1.070  | -1.173 |
|               |        |        |        | 1          | -10.406 | -1.149 | -0.345 |
| Aminophylline |        |        |        | Atovaquone |         |        |        |
| 8             | 0.561  | -2.706 | 0.000  | 17         | -8.218  | -0.483 | 0.000  |
| 8             | 2.312  | 1.552  | 0.000  | 8          | 2.665   | -2.356 | 0.000  |
| 7             | 0.031  | 1.375  | 0.000  | 8          | 1.842   | 2.313  | -0.001 |
| 7             | 1.426  | -0.553 | 0.000  | 8          | 4.522   | 2.738  | 0.000  |
| 7             | -2.176 | -1.330 | 0.000  | 6          | 0.609   | -0.274 | 0.000  |
| 7             | -2.353 | 0.897  | 0.000  | 6          | -2.254  | 0.521  | 0.000  |
| 6             | -1.046 | 0.530  | 0.000  | 6          | -0.078  | 0.263  | -1.263 |
| 6             | -0.890 | -0.836 | 0.000  | 6          | -0.079  | 0.264  | 1.264  |
| 6             | 0.370  | -1.500 | 0.000  | 6          | -1.570  | -0.038 | -1.253 |
| 6             | 1.321  | 0.848  | 0.001  | 6          | -1.570  | -0.037 | 1.254  |
| 6             | -0.166 | 2.815  | 0.000  | 6          | 2.100   | -0.032 | 0.000  |
| 6             | 2.793  | -1.062 | 0.000  | 6          | -3.740  | 0.269  | 0.000  |



|   |                     |        |        |   |                    |        |        |
|---|---------------------|--------|--------|---|--------------------|--------|--------|
| 6 | -3.002              | -0.258 | 0.000  | 6 | 3.013              | -1.053 | 0.000  |
| 1 | -2.426              | -2.308 | 0.000  | 6 | 2.583              | 1.342  | 0.000  |
| 1 | -0.726              | 3.118  | -0.887 | 6 | -4.648             | 1.328  | -0.001 |
| 1 | 0.815               | 3.282  | 0.001  | 6 | -4.254             | -1.032 | 0.001  |
| 1 | -0.728              | 3.118  | 0.885  | 6 | 4.465              | -0.871 | 0.000  |
| 1 | 2.737               | -2.147 | 0.000  | 6 | 4.108              | 1.599  | 0.000  |
| 1 | 3.327               | -0.709 | 0.883  | 6 | 5.007              | 0.426  | 0.000  |
| 1 | 3.327               | -0.708 | -0.882 | 6 | -6.021             | 1.112  | -0.001 |
| 1 | -4.077              | -0.360 | 0.000  | 6 | -5.622             | -1.272 | 0.001  |
|   |                     |        |        | 6 | 5.329              | -1.969 | 0.000  |
|   |                     |        |        | 6 | -6.497             | -0.192 | 0.000  |
|   |                     |        |        | 6 | 6.387              | 0.608  | 0.000  |
|   |                     |        |        | 6 | 6.706              | -1.775 | 0.000  |
|   |                     |        |        | 6 | 7.239              | -0.489 | 0.000  |
|   |                     |        |        | 1 | 0.412              | -1.363 | 0.001  |
|   |                     |        |        | 1 | -2.101             | 1.610  | 0.000  |
|   |                     |        |        | 1 | 0.393              | -0.167 | -2.154 |
|   |                     |        |        | 1 | 0.083              | 1.344  | -1.313 |
|   |                     |        |        | 1 | 0.083              | 1.345  | 1.313  |
|   |                     |        |        | 1 | 0.393              | -0.165 | 2.154  |
|   |                     |        |        | 1 | -2.046             | 0.368  | -2.152 |
|   |                     |        |        | 1 | -1.732             | -1.126 | -1.290 |
|   |                     |        |        | 1 | -1.732             | -1.125 | 1.292  |
|   |                     |        |        | 1 | -2.046             | 0.370  | 2.152  |
|   |                     |        |        | 1 | -4.273             | 2.348  | -0.001 |
|   |                     |        |        | 1 | -3.574             | -1.880 | 0.001  |
|   |                     |        |        | 1 | -6.717             | 1.943  | -0.001 |
|   |                     |        |        | 1 | -6.010             | -2.283 | 0.001  |
|   |                     |        |        | 1 | 4.917              | -2.971 | 0.000  |
|   |                     |        |        | 1 | 1.701              | -2.418 | 0.000  |
|   |                     |        |        | 1 | 6.767              | 1.624  | 0.000  |
|   |                     |        |        | 1 | 7.366              | -2.636 | 0.000  |
|   |                     |        |        | 1 | 8.314              | -0.345 | 0.000  |
|   | <b>Methotrexate</b> |        |        |   | <b>Anileridine</b> |        |        |
| 8 | 6.813               | -0.750 | 0.970  | 8 | -2.650             | 1.972  | -0.140 |
| 8 | 2.952               | -1.291 | -2.134 | 8 | -2.441             | 1.234  | 1.974  |
| 8 | 5.025               | -1.474 | 2.125  | 7 | 0.659              | -0.807 | 0.051  |
| 8 | 4.173               | 4.003  | 1.007  | 7 | 8.441              | 0.250  | 0.436  |
| 8 | 4.848               | 3.536  | -1.086 | 6 | -2.259             | -0.362 | 0.142  |
| 7 | -2.766              | -3.204 | 0.045  | 6 | -1.424             | -0.277 | -1.139 |
| 7 | 3.346               | -1.049 | 0.082  | 6 | -1.511             | -1.281 | 1.123  |
| 7 | -3.340              | -0.526 | 0.044  | 6 | 0.008              | 0.138  | -0.849 |
| 7 | -5.107              | 0.689  | 1.871  | 6 | -0.066             | -0.858 | 1.317  |
| 7 | -4.850              | 2.719  | 0.759  | 6 | -3.677             | -0.885 | -0.093 |
| 7 | -3.339              | 2.881  | -1.136 | 6 | 2.055              | -0.466 | 0.285  |
| 7 | -2.163              | 1.037  | -1.887 | 6 | -2.435             | 1.018  | 0.785  |
| 7 | -4.578              | 4.663  | -0.418 | 6 | 2.953              | -0.653 | -0.936 |
| 6 | 4.733               | -0.715 | -0.151 | 6 | -4.162             | -1.200 | -1.363 |
| 6 | 4.919               | 0.744  | -0.588 | 6 | -4.532             | -1.051 | 1.003  |
| 6 | -1.475              | -2.754 | -0.181 | 6 | 4.398              | -0.420 | -0.598 |
| 6 | 4.469               | 1.729  | 0.473  | 6 | -5.456             | -1.685 | -1.531 |
| 6 | -3.511              | -2.676 | 1.169  | 6 | -5.824             | -1.531 | 0.836  |
| 6 | 1.177               | -1.854 | -0.654 | 6 | -6.292             | -1.854 | -0.435 |
| 6 | 2.545               | -1.390 | -0.982 | 6 | -2.908             | 3.293  | 0.382  |
| 6 | -0.713              | -2.151 | 0.841  | 6 | 4.961              | 0.856  | -0.660 |
| 6 | -0.871              | -2.886 | -1.448 | 6 | 5.216              | -1.461 | -0.153 |
| 6 | 5.504               | -1.033 | 1.108  | 6 | -3.125             | 4.209  | -0.790 |
| 6 | 0.579               | -1.720 | 0.605  | 6 | 6.281              | 1.088  | -0.300 |
| 6 | 0.420               | -2.441 | -1.670 | 6 | 6.538              | -1.245 | 0.209  |
| 6 | -3.882              | -1.214 | 1.033  | 6 | 7.093              | 0.038  | 0.142  |
| 6 | -3.567              | -3.589 | -1.101 | 1 | -1.873             | 0.420  | -1.851 |
| 6 | 4.530               | 3.155  | 0.012  | 1 | -1.409             | -1.267 | -1.608 |
| 6 | -4.765              | -0.580 | 1.937  | 1 | -2.018             | -1.289 | 2.090  |
| 6 | -3.656              | 0.773  | -0.031 | 1 | -1.546             | -2.299 | 0.721  |
| 6 | -4.544              | 1.414  | 0.865  | 1 | 0.027              | 1.165  | -0.423 |
| 6 | -3.045              | 1.599  | -1.039 | 1 | 0.569              | 0.181  | -1.786 |
| 6 | -4.245              | 3.357  | -0.239 | 1 | 0.444              | -1.571 | 1.973  |
| 1 | 5.126               | -1.349 | -0.957 | 1 | -0.034             | 0.124  | 1.831  |
| 1 | 4.345               | 0.886  | -1.506 | 1 | 2.161              | 0.572  | 0.663  |
| 1 | 5.967               | 0.912  | -0.847 | 1 | 2.421              | -1.117 | 1.089  |
| 1 | 5.066               | 1.651  | 1.391  | 1 | 2.651              | 0.032  | -1.735 |
| 1 | 3.439               | 1.522  | 0.787  | 1 | 2.806              | -1.668 | -1.322 |
| 1 | 3.137               | -1.408 | 1.005  | 1 | -3.532             | -1.071 | -2.236 |
| 1 | -4.418              | -3.280 | 1.285  | 1 | -4.180             | -0.787 | 1.996  |
| 1 | -2.949              | -2.833 | 2.097  | 1 | -5.811             | -1.929 | -2.528 |
| 1 | -1.142              | -1.990 | 1.822  | 1 | -6.469             | -1.652 | 1.700  |
| 1 | -1.419              | -3.329 | -2.270 | 1 | -7.300             | -2.232 | -0.567 |
| 1 | 1.109               | -1.233 | 1.419  | 1 | -2.056             | 3.595  | 0.999  |
| 1 | 0.871               | -2.536 | -2.653 | 1 | -3.780             | 3.241  | 1.042  |
| 1 | -4.548              | -3.913 | -0.753 | 1 | 4.351              | 1.690  | -1.001 |
| 1 | -3.111              | -4.431 | -1.628 | 1 | 4.807              | -2.467 | -0.091 |
| 1 | -3.707              | -2.765 | -1.815 | 1 | -3.975             | 3.884  | -1.393 |
| 1 | -5.211              | -1.161 | 2.747  | 1 | -2.244             | 4.243  | -1.434 |
| 1 | 7.240               | -0.980 | 1.807  | 1 | -3.327             | 5.223  | -0.439 |

|    |                   |        |        |   |             |        |        |
|----|-------------------|--------|--------|---|-------------|--------|--------|
| 1  | 4.230             | 4.897  | 0.641  | 1 | 6.696       | 2.091  | -0.368 |
| 1  | -1.631            | 1.630  | -2.501 | 1 | 7.154       | -2.077 | 0.541  |
| 1  | -1.844            | 0.097  | -1.699 | 1 | 8.840       | -0.423 | 1.075  |
| 1  | -3.981            | 5.220  | -1.006 | 1 | 8.662       | 1.192  | 0.724  |
| 1  | -5.076            | 5.116  | 0.330  |   |             |        |        |
|    | Bupropion         |        |        |   | Aspirin     |        |        |
| 17 | 2.835             | 2.316  | 0.633  | 8 | 1.013       | -1.045 | -0.606 |
| 8  | -0.341            | -3.107 | 0.158  | 8 | -0.557      | 2.835  | 0.137  |
| 7  | -1.683            | -0.135 | -0.550 | 8 | 1.245       | 1.698  | -0.558 |
| 6  | -2.519            | 1.085  | -0.377 | 8 | 1.679       | -0.471 | 1.483  |
| 6  | -1.444            | -1.017 | 0.596  | 6 | -0.307      | -0.793 | -0.304 |
| 6  | -2.012            | 2.080  | -1.418 | 6 | -0.794      | 0.509  | -0.102 |
| 6  | -3.980            | 0.752  | -0.681 | 6 | -1.163      | -1.885 | -0.268 |
| 6  | -2.403            | 1.708  | 1.015  | 6 | -2.163      | 0.667  | 0.152  |
| 6  | -2.652            | -1.858 | 0.955  | 6 | -2.517      | -1.701 | -0.027 |
| 6  | -0.247            | -1.901 | 0.243  | 6 | -3.019      | -0.421 | 0.189  |
| 6  | 1.070             | -1.226 | -0.001 | 6 | 0.088       | 1.691  | -0.202 |
| 6  | 1.312             | 0.094  | 0.392  | 6 | 1.962       | -0.749 | 0.353  |
| 6  | 2.087             | -1.953 | -0.625 | 6 | 3.321       | -0.839 | -0.247 |
| 6  | 2.552             | 0.666  | 0.147  | 1 | -0.745      | -2.872 | -0.430 |
| 6  | 3.320             | -1.365 | -0.866 | 1 | -2.544      | 1.668  | 0.313  |
| 6  | 3.564             | -0.049 | -0.484 | 1 | -3.179      | -2.560 | -0.002 |
| 1  | -0.790            | 0.158  | -0.930 | 1 | -4.075      | -0.273 | 0.385  |
| 1  | -1.138            | -0.452 | 1.500  | 1 | 3.406       | -1.698 | -0.913 |
| 1  | -2.044            | 1.641  | -2.419 | 1 | 4.074       | -0.885 | 0.536  |
| 1  | -2.624            | 2.985  | -1.426 | 1 | 3.479       | 0.060  | -0.847 |
| 1  | -0.978            | 2.378  | -1.208 | 1 | 0.094       | 3.542  | 0.033  |
| 1  | -4.403            | 0.054  | 0.043  |   |             |        |        |
| 1  | -4.068            | 0.300  | -1.671 |   |             |        |        |
| 1  | -4.593            | 1.659  | -0.659 |   |             |        |        |
| 1  | -1.366            | 1.960  | 1.260  |   |             |        |        |
| 1  | -2.983            | 2.633  | 1.065  |   |             |        |        |
| 1  | -2.786            | 1.046  | 1.797  |   |             |        |        |
| 1  | -2.380            | -2.624 | 1.683  |   |             |        |        |
| 1  | -3.444            | -1.246 | 1.390  |   |             |        |        |
| 1  | -3.046            | -2.360 | 0.069  |   |             |        |        |
| 1  | 0.549             | 0.678  | 0.895  |   |             |        |        |
| 1  | 1.883             | -2.978 | -0.913 |   |             |        |        |
| 1  | 4.106             | -1.929 | -1.357 |   |             |        |        |
| 1  | 4.523             | 0.421  | -0.668 |   |             |        |        |
|    | Dantrolene        |        |        |   | Cycloserine |        |        |
| 8  | -0.270            | -0.201 | 0.000  | 8 | -1.763      | -0.359 | 0.115  |
| 8  | 6.511             | 2.743  | 0.000  | 8 | 0.957       | 1.796  | 0.026  |
| 8  | 5.854             | -1.807 | 0.000  | 7 | -1.145      | 0.874  | -0.240 |
| 8  | -7.517            | 0.173  | 0.000  | 7 | 1.777       | -0.974 | -0.273 |
| 8  | -6.728            | 2.199  | 0.001  | 6 | 0.540       | -0.595 | 0.373  |
| 7  | 4.351             | -0.013 | 0.000  | 6 | -0.709      | -1.303 | -0.130 |
| 7  | 6.519             | 0.428  | 0.000  | 6 | 0.193       | 0.856  | 0.064  |
| 7  | 3.237             | -0.761 | 0.000  | 1 | 0.569       | -0.650 | 1.476  |
| 7  | -6.593            | 0.980  | 0.000  | 1 | -0.614      | -1.505 | -1.205 |
| 6  | 4.447             | 1.435  | 0.000  | 1 | -0.988      | -2.212 | 0.402  |
| 6  | -1.302            | -1.093 | 0.000  | 1 | -1.743      | 1.655  | -0.009 |
| 6  | -2.639            | -0.560 | 0.000  | 1 | 2.268       | -1.677 | 0.265  |
| 6  | 0.891             | -0.916 | 0.000  | 1 | 2.382       | -0.156 | -0.306 |
| 6  | 5.947             | 1.680  | 0.000  |   |             |        |        |
| 6  | 5.602             | -0.636 | 0.000  |   |             |        |        |
| 6  | -0.793            | -2.372 | 0.000  |   |             |        |        |
| 6  | 0.609             | -2.261 | 0.000  |   |             |        |        |
| 6  | -3.747            | -1.428 | 0.000  |   |             |        |        |
| 6  | -2.866            | 0.828  | 0.000  |   |             |        |        |
| 6  | 2.099             | -0.150 | 0.000  |   |             |        |        |
| 6  | -5.226            | 0.448  | 0.000  |   |             |        |        |
| 6  | -5.035            | -0.931 | 0.000  |   |             |        |        |
| 6  | -4.153            | 1.332  | 0.000  |   |             |        |        |
| 1  | 3.986             | 1.883  | 0.888  |   |             |        |        |
| 1  | 3.986             | 1.883  | -0.887 |   |             |        |        |
| 1  | -1.370            | -3.284 | 0.000  |   |             |        |        |
| 1  | 7.515             | 0.264  | 0.000  |   |             |        |        |
| 1  | 1.343             | -3.051 | 0.000  |   |             |        |        |
| 1  | -3.590            | -2.501 | 0.000  |   |             |        |        |
| 1  | -2.020            | 1.504  | 0.000  |   |             |        |        |
| 1  | 1.988             | 0.938  | 0.000  |   |             |        |        |
| 1  | -5.898            | -1.585 | 0.000  |   |             |        |        |
| 1  | -4.348            | 2.398  | 0.000  |   |             |        |        |
|    | Aminoglutethimide |        |        |   | Abacavir    |        |        |
| 8  | 1.746             | 0.703  | 2.081  | 8 | -4.932      | 2.189  | 0.032  |
| 8  | 2.306             | -3.142 | -0.222 | 7 | 3.564       | -0.489 | -0.251 |
| 7  | 2.008             | -1.171 | 0.851  | 7 | -0.868      | -1.698 | -0.022 |
| 7  | -4.807            | -0.382 | 0.191  | 7 | 1.251       | -2.457 | -0.202 |
| 6  | 0.827             | 0.754  | -0.164 | 7 | 1.947       | 1.181  | -0.104 |
| 6  | 1.430             | 0.166  | -1.453 | 7 | -0.426      | 0.701  | 0.047  |
| 6  | 0.979             | 2.287  | -0.110 | 7 | 0.380       | 2.860  | 0.010  |
| 6  | -0.660            | 0.401  | -0.051 | 6 | 4.633       | 0.435  | -0.456 |
| 6  | 1.310             | -1.347 | -1.485 | 6 | 5.154       | 1.199  | 0.721  |

|    |            |        |        |   |             |        |        |
|----|------------|--------|--------|---|-------------|--------|--------|
| 6  | 1.564      | 0.138  | 1.023  | 6 | 5.964       | 0.084  | 0.130  |
| 6  | 1.914      | -1.998 | -0.271 | 6 | -2.328      | -1.735 | 0.092  |
| 6  | 2.397      | 2.811  | -0.257 | 6 | -3.047      | -0.904 | -0.995 |
| 6  | -1.233     | -0.130 | 1.106  | 6 | -4.064      | -0.004 | -0.264 |
| 6  | -1.516     | 0.652  | -1.129 | 6 | -2.834      | -1.160 | 1.385  |
| 6  | -2.591     | -0.411 | 1.183  | 6 | -3.772      | -0.239 | 1.189  |
| 6  | -2.872     | 0.377  | -1.065 | 6 | 2.260       | -0.116 | -0.171 |
| 6  | -3.436     | -0.165 | 0.097  | 6 | -0.061      | -0.583 | -0.027 |
| 1  | 2.487      | 0.449  | -1.515 | 6 | 1.235       | -1.079 | -0.139 |
| 1  | 0.946      | 0.610  | -2.328 | 6 | -3.936      | 1.455  | -0.667 |
| 1  | 0.557      | 2.623  | 0.842  | 6 | -0.015      | -2.779 | -0.129 |
| 1  | 0.338      | 2.706  | -0.895 | 6 | 0.643       | 1.508  | -0.001 |
| 1  | 1.784      | -1.791 | -2.363 | 1 | 4.622       | 0.957  | -1.411 |
| 1  | 0.255      | -1.647 | -1.517 | 1 | 4.664       | 1.019  | 1.669  |
| 1  | 2.444      | -1.591 | 1.665  | 1 | 5.472       | 2.221  | 0.558  |
| 1  | 3.067      | 2.372  | 0.487  | 1 | 6.851       | 0.326  | -0.443 |
| 1  | 2.815      | 2.615  | -1.249 | 1 | 6.030       | -0.841 | 0.692  |
| 1  | 2.422      | 3.893  | -0.111 | 1 | -2.582      | -2.801 | 0.014  |
| 1  | -0.618     | -0.323 | 1.980  | 1 | -3.520      | -1.544 | -1.741 |
| 1  | -1.119     | 1.076  | -2.048 | 1 | -2.311      | -0.289 | -1.520 |
| 1  | -3.004     | -0.820 | 2.100  | 1 | -5.096      | -0.312 | -0.486 |
| 1  | -3.509     | 0.590  | -1.920 | 1 | 3.724       | -1.467 | -0.448 |
| 1  | -5.277     | -0.531 | -0.690 | 1 | -2.452      | -1.493 | 2.344  |
| 1  | -5.083     | -1.070 | 0.876  | 1 | -4.292      | 0.306  | 1.968  |
|    |            |        |        | 1 | -4.068      | 1.548  | -1.756 |
|    |            |        |        | 1 | -2.922      | 1.804  | -0.420 |
|    |            |        |        | 1 | -0.410      | -3.786 | -0.148 |
|    |            |        |        | 1 | -4.829      | 3.118  | -0.185 |
|    |            |        |        | 1 | 1.162       | 3.434  | 0.284  |
|    |            |        |        | 1 | -0.503      | 3.114  | 0.425  |
|    | Diazepam   |        |        |   | Anisindione |        |        |
| 17 | 0.512      | 4.219  | -0.570 | 8 | 0.959       | -2.371 | 0.760  |
| 8  | 2.472      | -3.535 | -0.121 | 8 | 0.959       | 2.377  | 0.744  |
| 7  | 2.102      | -1.395 | 0.559  | 8 | -4.990      | -0.001 | -0.373 |
| 7  | -0.315     | -1.960 | -1.068 | 6 | 0.469       | 0.004  | 1.137  |
| 6  | 0.407      | 0.215  | -0.229 | 6 | 1.278       | -1.210 | 0.654  |
| 6  | 1.697      | -0.078 | 0.263  | 6 | 1.278       | 1.215  | 0.646  |
| 6  | -0.592     | -0.848 | -0.483 | 6 | 2.523       | -0.698 | 0.034  |
| 6  | 1.045      | -2.173 | -1.509 | 6 | 2.523       | 0.698  | 0.029  |
| 6  | 1.940      | -2.464 | -0.322 | 6 | -0.974      | 0.003  | 0.722  |
| 6  | -1.995     | -0.626 | -0.059 | 6 | 3.590       | -1.418 | -0.495 |
| 6  | 0.063      | 1.550  | -0.478 | 6 | 3.590       | 1.415  | -0.505 |
| 6  | 2.579      | 0.979  | 0.527  | 6 | -2.005      | 0.008  | 1.664  |
| 6  | 3.014      | -1.617 | 1.674  | 6 | -1.318      | -0.004 | -0.628 |
| 6  | 0.963      | 2.571  | -0.237 | 6 | 4.655       | -0.705 | -1.029 |
| 6  | 2.225      | 2.293  | 0.282  | 6 | 4.655       | 0.697  | -1.034 |
| 6  | -2.318     | 0.230  | 1.000  | 6 | -3.333      | 0.006  | 1.274  |
| 6  | -3.027     | -1.321 | -0.702 | 6 | -2.646      | -0.005 | -1.040 |
| 6  | -3.638     | 0.387  | 1.406  | 6 | -3.662      | 0.000  | -0.083 |
| 6  | -4.344     | -1.156 | -0.301 | 6 | -5.356      | -0.007 | -1.737 |
| 6  | -4.655     | -0.300 | 0.754  | 1 | 0.527       | 0.008  | 2.233  |
| 1  | 1.448      | -1.303 | -2.051 | 1 | 3.578       | -2.503 | -0.485 |
| 1  | 1.084      | -3.042 | -2.165 | 1 | 3.578       | 2.500  | -0.502 |
| 1  | -0.926     | 1.779  | -0.858 | 1 | -1.761      | 0.013  | 2.722  |
| 1  | 3.566      | 0.763  | 0.919  | 1 | -0.536      | -0.008 | -1.385 |
| 1  | 2.770      | -0.928 | 2.483  | 1 | 5.503       | -1.235 | -1.452 |
| 1  | 4.062      | -1.480 | 1.387  | 1 | 5.503       | 1.225  | -1.460 |
| 1  | 2.896      | -2.644 | 2.012  | 1 | -4.134      | 0.010  | 2.004  |
| 1  | 2.922      | 3.099  | 0.479  | 1 | -2.877      | -0.010 | -2.098 |
| 1  | -1.529     | 0.762  | 1.523  | 1 | -4.984      | 0.883  | -2.259 |
| 1  | -2.769     | -1.990 | -1.515 | 1 | -6.445      | -0.007 | -1.760 |
| 1  | -3.871     | 1.047  | 2.236  | 1 | -4.985      | -0.902 | -2.251 |
| 1  | -5.135     | -1.693 | -0.814 |   |             |        |        |
| 1  | -5.686     | -0.172 | 1.066  |   |             |        |        |
|    | Ethinamate |        |        |   | Fenoprofen  |        |        |
| 8  | -0.644     | -0.448 | -0.658 | 8 | -1.682      | 1.659  | 0.195  |
| 8  | -2.233     | -0.408 | 0.984  | 8 | 3.609       | -2.426 | -0.464 |
| 7  | -2.282     | -1.943 | -0.712 | 8 | 1.438       | -1.972 | -0.824 |
| 6  | 0.110      | 0.667  | -0.076 | 6 | 2.786       | -0.435 | 0.505  |
| 6  | 1.266      | 0.864  | -1.066 | 6 | 1.883       | 0.720  | 0.154  |
| 6  | 0.658      | 0.296  | 1.310  | 6 | 0.506       | 0.624  | 0.353  |
| 6  | 2.191      | -0.345 | -1.116 | 6 | 2.683       | -0.841 | 1.982  |
| 6  | 1.572      | -0.920 | 1.249  | 6 | 2.417       | 1.896  | -0.372 |
| 6  | 2.718      | -0.706 | 0.267  | 6 | -0.323      | 1.681  | -0.004 |
| 6  | -0.721     | 1.865  | -0.029 | 6 | 2.498       | -1.659 | -0.344 |
| 6  | -1.772     | -0.868 | -0.032 | 6 | 1.582       | 2.961  | -0.696 |
| 6  | -1.339     | 2.898  | -0.017 | 6 | 0.210       | 2.860  | -0.522 |
| 1  | 1.819      | 1.754  | -0.742 | 6 | -2.391      | 0.484  | 0.069  |
| 1  | 0.850      | 1.092  | -2.051 | 6 | -2.053      | -0.514 | -0.842 |
| 1  | -0.173     | 0.150  | 2.001  | 6 | -3.536      | 0.371  | 0.854  |
| 1  | 1.220      | 1.169  | 1.666  | 6 | -2.867      | -1.636 | -0.949 |
| 1  | 3.018      | -0.140 | -1.804 | 6 | -4.343      | -0.752 | 0.728  |
| 1  | 1.645      | -1.199 | -1.535 | 6 | -4.012      | -1.762 | -0.169 |
| 1  | 0.989      | -1.801 | 0.950  | 1 | 3.823       | -0.146 | 0.306  |

|    |                       |        |        |    |               |        |        |
|----|-----------------------|--------|--------|----|---------------|--------|--------|
| 1  | 1.956                 | -1.135 | 2.251  | 1  | 0.075         | -0.285 | 0.757  |
| 1  | 3.352                 | -1.597 | 0.214  | 1  | 2.915         | 0.013  | 2.621  |
| 1  | 3.360                 | 0.106  | 0.635  | 1  | 1.674         | -1.179 | 2.227  |
| 1  | -1.910                | 3.793  | 0.012  | 1  | 3.380         | -1.648 | 2.219  |
| 1  | -1.999                | -2.069 | -1.671 | 1  | 3.489         | 1.975  | -0.530 |
| 1  | -3.236                | -2.173 | -0.491 | 1  | 2.004         | 3.876  | -1.101 |
|    |                       |        |        | 1  | -0.460        | 3.672  | -0.780 |
|    |                       |        |        | 1  | -1.161        | -0.422 | -1.451 |
|    |                       |        |        | 1  | -3.776        | 1.169  | 1.548  |
|    |                       |        |        | 1  | -2.599        | -2.415 | -1.656 |
|    |                       |        |        | 1  | -5.235        | -0.837 | 1.341  |
|    |                       |        |        | 1  | 3.350         | -3.210 | -0.969 |
|    |                       |        |        | 1  | -4.641        | -2.641 | -0.260 |
|    | Acetazolamide         |        |        |    | Carbamazepine |        |        |
| 16 | 2.808                 | -0.077 | 0.043  | 8  | 1.077         | 2.624  | -0.983 |
| 16 | -0.042                | -1.290 | 0.155  | 7  | 0.008         | 0.788  | -0.123 |
| 8  | 3.121                 | -0.647 | 1.334  | 7  | -1.200        | 2.555  | -1.070 |
| 8  | 3.238                 | -0.681 | -1.196 | 6  | 1.244         | 0.157  | 0.203  |
| 8  | -3.622                | 1.358  | 0.594  | 6  | -1.201        | 0.120  | 0.229  |
| 7  | -2.642                | -0.539 | -0.249 | 6  | 1.584         | -1.058 | -0.417 |
| 7  | 0.434                 | 1.188  | -0.325 | 6  | -1.548        | -1.083 | -0.414 |
| 7  | 3.331                 | 1.490  | 0.045  | 6  | 0.694         | -1.766 | -1.320 |
| 7  | -0.911                | 1.078  | -0.435 | 6  | -0.656        | -1.774 | -1.328 |
| 6  | 1.018                 | 0.062  | -0.044 | 6  | 2.125         | 0.776  | 1.084  |
| 6  | -1.323                | -0.142 | -0.219 | 6  | -2.055        | 0.691  | 1.171  |
| 6  | -3.743                | 0.252  | 0.140  | 6  | 2.848         | -1.605 | -0.140 |
| 6  | -5.060                | -0.435 | -0.101 | 6  | -2.803        | -1.643 | -0.123 |
| 1  | -2.824                | -1.501 | -0.492 | 6  | 0.040         | 2.032  | -0.756 |
| 1  | 3.033                 | 1.983  | -0.792 | 6  | 3.363         | 0.209  | 1.351  |
| 1  | 3.022                 | 1.985  | 0.876  | 6  | -3.284        | 0.110  | 1.453  |
| 1  | -5.392                | -0.219 | -1.120 | 6  | 3.726         | -0.987 | 0.734  |
| 1  | -5.803                | -0.033 | 0.585  | 6  | -3.662        | -1.059 | 0.794  |
| 1  | -5.009                | -1.520 | 0.011  | 1  | 1.191         | -2.449 | -2.006 |
|    |                       |        |        | 1  | -1.142        | -2.461 | -2.017 |
|    |                       |        |        | 1  | 1.841         | 1.724  | 1.526  |
|    |                       |        |        | 1  | -1.755        | 1.617  | 1.652  |
|    |                       |        |        | 1  | 3.128         | -2.536 | -0.625 |
|    |                       |        |        | 1  | -3.090        | -2.562 | -0.627 |
|    |                       |        |        | 1  | 4.051         | 0.707  | 2.026  |
|    |                       |        |        | 1  | -3.948        | 0.571  | 2.176  |
|    |                       |        |        | 1  | 4.697         | -1.430 | 0.931  |
|    |                       |        |        | 1  | -4.624        | -1.515 | 1.001  |
|    |                       |        |        | 1  | -1.141        | 3.305  | -1.741 |
|    |                       |        |        | 1  | -1.974        | 1.920  | -1.207 |
|    | Acetaminophen         |        |        |    | Clonidine     |        |        |
| 8  | 3.963                 | -0.236 | 0.000  | 17 | -0.321        | 2.436  | -0.664 |
| 8  | -2.509                | -1.434 | 0.000  | 17 | 1.702         | -2.572 | -0.180 |
| 7  | -1.537                | 0.639  | 0.000  | 7  | -2.741        | -1.021 | -0.699 |
| 6  | -0.161                | 0.340  | 0.000  | 7  | -0.422        | -0.569 | -0.831 |
| 6  | 0.348                 | -0.961 | 0.000  | 7  | -1.729        | 0.079  | 1.041  |
| 6  | 0.733                 | 1.417  | 0.000  | 6  | -3.864        | -0.499 | 0.090  |
| 6  | 1.723                 | -1.161 | 0.000  | 6  | -3.150        | -0.022 | 1.371  |
| 6  | 2.102                 | 1.213  | 0.000  | 6  | -1.608        | -0.461 | -0.109 |
| 6  | 2.606                 | -0.086 | 0.000  | 6  | 0.761         | -0.032 | -0.308 |
| 6  | -2.611                | -0.220 | 0.000  | 6  | 0.935         | 1.353  | -0.156 |
| 6  | -3.953                | 0.470  | 0.000  | 6  | 1.853         | -0.844 | 0.024  |
| 1  | -0.332                | -1.800 | 0.000  | 6  | 2.112         | 1.886  | 0.349  |
| 1  | 0.347                 | 2.433  | 0.000  | 6  | 3.047         | -0.327 | 0.504  |
| 1  | -1.755                | 1.624  | -0.001 | 6  | 3.166         | 1.045  | 0.680  |
| 1  | 2.111                 | -2.177 | 0.000  | 1  | -4.614        | -1.272 | 0.273  |
| 1  | 2.791                 | 2.050  | 0.000  | 1  | -4.356        | 0.332  | -0.432 |
| 1  | -4.517                | 0.147  | 0.877  | 1  | -3.536        | 0.935  | 1.735  |
| 1  | -4.517                | 0.145  | -0.876 | 1  | -3.276        | -0.743 | 2.189  |
| 1  | -3.900                | 1.560  | -0.001 | 1  | -2.806        | -0.891 | -1.701 |
| 1  | 4.171                 | -1.174 | 0.000  | 1  | -0.300        | -1.487 | -1.241 |
|    |                       |        |        | 1  | 2.198         | 2.960  | 0.459  |
|    |                       |        |        | 1  | 3.861         | -0.999 | 0.748  |
|    |                       |        |        | 1  | 4.089         | 1.461  | 1.067  |
|    | 4-Aminosalicylic acid |        |        |    | Clomiphene    |        |        |
| 8  | -0.580                | 2.178  | 0.000  | 17 | -4.954        | 1.159  | 0.789  |
| 8  | -2.613                | -1.488 | 0.003  | 8  | 2.728         | -1.152 | -0.857 |
| 8  | -2.780                | 0.747  | 0.005  | 7  | 6.140         | -0.362 | 0.203  |
| 7  | 3.570                 | -0.115 | -0.062 | 6  | 5.071         | -0.922 | -0.613 |
| 6  | -0.619                | -0.238 | -0.002 | 6  | 6.401         | -1.202 | 1.374  |
| 6  | 0.065                 | 1.006  | -0.003 | 6  | 7.356         | -0.128 | -0.577 |
| 6  | 2.193                 | -0.148 | -0.004 | 6  | 3.720         | -0.485 | -0.089 |
| 6  | 1.456                 | 1.035  | -0.003 | 6  | 7.092         | -0.457 | 2.498  |
| 6  | 0.146                 | -1.418 | -0.002 | 6  | 7.246         | 1.079  | -1.485 |
| 6  | 1.519                 | -1.389 | -0.004 | 6  | -1.327        | -0.468 | -0.169 |
| 6  | -2.064                | -0.252 | 0.002  | 6  | 1.426         | -0.889 | -0.580 |
| 1  | 1.951                 | 2.000  | -0.006 | 6  | -2.780        | -0.268 | 0.035  |
| 1  | -0.376                | -2.369 | 0.000  | 6  | -0.867        | -1.358 | -1.153 |
| 1  | 2.092                 | -2.311 | -0.010 | 6  | -0.371        | 0.178  | 0.618  |
| 1  | 4.055                 | -0.942 | 0.249  | 6  | 0.484         | -1.561 | -1.366 |

|             |        |        |        |              |        |        |        |
|-------------|--------|--------|--------|--------------|--------|--------|--------|
| 1           | 4.016  | 0.742  | 0.226  | 6            | 0.991  | -0.021 | 0.424  |
| 1           | -1.542 | 1.978  | 0.002  | 6            | -3.601 | -1.501 | 0.043  |
| 1           | -3.570 | -1.352 | 0.005  | 6            | -3.291 | 0.972  | 0.233  |
|             |        |        |        | 6            | -2.596 | 2.258  | 0.052  |
|             |        |        |        | 6            | -3.172 | -2.618 | 0.770  |
|             |        |        |        | 6            | -4.772 | -1.610 | -0.715 |
|             |        |        |        | 6            | -3.909 | -3.796 | 0.767  |
|             |        |        |        | 6            | -5.499 | -2.793 | -0.732 |
|             |        |        |        | 6            | -1.794 | 2.471  | -1.078 |
|             |        |        |        | 6            | -2.733 | 3.297  | 0.980  |
|             |        |        |        | 6            | -5.076 | -3.888 | 0.015  |
|             |        |        |        | 6            | -1.128 | 3.675  | -1.255 |
|             |        |        |        | 6            | -2.057 | 4.497  | 0.804  |
|             |        |        |        | 6            | -1.250 | 4.691  | -0.312 |
|             |        |        |        | 1            | 5.113  | -2.026 | -0.659 |
|             |        |        |        | 1            | 5.172  | -0.571 | -1.643 |
|             |        |        |        | 1            | 5.439  | -1.577 | 1.736  |
|             |        |        |        | 1            | 6.983  | -2.101 | 1.089  |
|             |        |        |        | 1            | 8.176  | 0.032  | 0.128  |
|             |        |        |        | 1            | 7.631  | -1.029 | -1.160 |
|             |        |        |        | 1            | 3.612  | 0.605  | -0.182 |
|             |        |        |        | 1            | 3.606  | -0.737 | 0.975  |
|             |        |        |        | 1            | 8.078  | -0.087 | 2.206  |
|             |        |        |        | 1            | 6.497  | 0.402  | 2.815  |
|             |        |        |        | 1            | 7.237  | -1.111 | 3.361  |
|             |        |        |        | 1            | 6.451  | 0.970  | -2.227 |
|             |        |        |        | 1            | 7.036  | 1.980  | -0.904 |
|             |        |        |        | 1            | 8.178  | 1.235  | -2.035 |
|             |        |        |        | 1            | -1.589 | -1.892 | -1.764 |
|             |        |        |        | 1            | -0.697 | 0.852  | 1.404  |
|             |        |        |        | 1            | 0.837  | -2.240 | -2.134 |
|             |        |        |        | 1            | 1.700  | 0.493  | 1.061  |
|             |        |        |        | 1            | -2.253 | -2.554 | 1.344  |
|             |        |        |        | 1            | -5.105 | -0.761 | -1.303 |
|             |        |        |        | 1            | -3.568 | -4.646 | 1.350  |
|             |        |        |        | 1            | -6.400 | -2.861 | -1.335 |
|             |        |        |        | 1            | -1.697 | 1.681  | -1.816 |
|             |        |        |        | 1            | -3.372 | 3.153  | 1.845  |
|             |        |        |        | 1            | -5.648 | -4.810 | 0.005  |
|             |        |        |        | 1            | -0.516 | 3.823  | -2.140 |
|             |        |        |        | 1            | -2.167 | 5.287  | 1.541  |
|             |        |        |        | 1            | -0.728 | 5.633  | -0.452 |
| Angrelide   |        |        |        | Diclofenac   |        |        |        |
| 17          | 2.158  | -2.119 | 0.000  | 17           | 1.343  | -2.233 | 1.387  |
| 17          | 4.410  | 0.112  | 0.000  | 17           | 1.338  | 2.687  | -0.905 |
| 8           | -5.467 | -0.313 | 0.000  | 8            | -4.174 | 1.949  | 0.668  |
| 7           | -1.978 | -0.568 | 0.000  | 8            | -1.996 | 2.390  | 0.353  |
| 7           | -3.546 | 0.982  | 0.000  | 7            | 0.053  | 0.277  | 0.302  |
| 7           | -1.303 | 1.720  | 0.000  | 6            | -2.167 | -0.677 | 0.145  |
| 6           | -0.662 | -1.164 | 0.000  | 6            | -0.828 | -0.652 | -0.287 |
| 6           | -3.219 | -1.299 | 0.000  | 6            | -2.632 | 0.242  | 1.246  |
| 6           | -2.176 | 0.776  | 0.000  | 6            | 1.434  | 0.199  | 0.166  |
| 6           | 0.385  | -0.083 | 0.000  | 6            | -3.053 | -1.574 | -0.447 |
| 6           | 0.022  | 1.279  | 0.000  | 6            | -0.410 | -1.546 | -1.275 |
| 6           | -4.268 | -0.195 | 0.000  | 6            | -2.635 | -2.461 | -1.432 |
| 6           | 1.734  | -0.432 | 0.000  | 6            | -1.304 | -2.445 | -1.838 |
| 6           | 1.033  | 2.246  | 0.000  | 6            | 2.172  | -0.914 | 0.613  |
| 6           | 2.733  | 0.545  | 0.000  | 6            | 2.185  | 1.267  | -0.359 |
| 6           | 2.368  | 1.887  | 0.000  | 6            | -2.865 | 1.633  | 0.722  |
| 1           | -0.542 | -1.820 | -0.877 | 6            | 3.553  | -0.978 | 0.497  |
| 1           | -0.542 | -1.819 | 0.878  | 6            | 3.568  | 1.230  | -0.455 |
| 1           | -3.336 | -1.937 | 0.885  | 6            | 4.252  | 0.096  | -0.039 |
| 1           | -3.336 | -1.937 | -0.885 | 1            | -1.854 | 0.310  | 2.015  |
| 1           | -3.953 | 1.905  | 0.000  | 1            | -3.545 | -0.142 | 1.702  |
| 1           | 0.740  | 3.290  | 0.000  | 1            | -0.317 | 1.225  | 0.314  |
| 1           | 3.146  | 2.642  | 0.000  | 1            | -4.086 | -1.584 | -0.110 |
|             |        |        |        | 1            | 0.623  | -1.524 | -1.605 |
|             |        |        |        | 1            | -3.337 | -3.160 | -1.871 |
|             |        |        |        | 1            | -0.960 | -3.130 | -2.606 |
|             |        |        |        | 1            | 4.070  | -1.861 | 0.852  |
|             |        |        |        | 1            | 4.093  | 2.083  | -0.868 |
|             |        |        |        | 1            | 5.332  | 0.053  | -0.121 |
|             |        |        |        | 1            | -4.230 | 2.837  | 0.285  |
| Allopurinol |        |        |        | Flurbiprofen |        |        |        |
| 8           | -1.752 | 1.958  | 0.000  | 9            | 0.733  | 1.936  | 0.898  |
| 7           | 1.983  | -0.725 | 0.000  | 8            | -3.966 | -0.174 | -1.902 |
| 7           | -1.929 | -0.330 | 0.000  | 8            | -4.360 | 1.375  | -0.319 |
| 7           | -0.140 | -1.871 | 0.000  | 6            | -3.297 | -0.712 | 0.305  |
| 7           | 2.483  | 0.536  | 0.000  | 6            | -1.792 | -0.556 | 0.204  |
| 6           | 0.224  | 0.585  | 0.000  | 6            | 1.029  | -0.250 | 0.033  |
| 6           | 0.633  | -0.753 | 0.000  | 6            | -1.183 | 0.640  | 0.585  |
| 6           | -1.179 | 0.889  | 0.000  | 6            | -0.987 | -1.592 | -0.267 |
| 6           | 1.422  | 1.330  | 0.000  | 6            | 0.189  | 0.769  | 0.492  |
| 6           | -1.408 | -1.588 | 0.000  | 6            | 0.389  | -1.439 | -0.343 |

|             |        |        |        |            |        |        |        |
|-------------|--------|--------|--------|------------|--------|--------|--------|
| 1           | 1.551  | 2.402  | 0.000  | 6          | -3.807 | -0.527 | 1.728  |
| 1           | 2.613  | -1.512 | 0.000  | 6          | 2.495  | -0.116 | -0.050 |
| 1           | -2.934 | -0.210 | 0.000  | 6          | -3.943 | 0.288  | -0.631 |
| 1           | -2.133 | -2.398 | 0.000  | 6          | 3.107  | 1.065  | -0.489 |
|             |        |        |        | 6          | 3.314  | -1.202 | 0.288  |
|             |        |        |        | 6          | 4.490  | 1.151  | -0.591 |
|             |        |        |        | 6          | 4.696  | -1.113 | 0.189  |
|             |        |        |        | 6          | 5.290  | 0.065  | -0.252 |
|             |        |        |        | 1          | -3.549 | -1.713 | -0.062 |
|             |        |        |        | 1          | -1.765 | 1.479  | 0.954  |
|             |        |        |        | 1          | -1.446 | -2.524 | -0.584 |
|             |        |        |        | 1          | 0.998  | -2.251 | -0.729 |
|             |        |        |        | 1          | -3.322 | -1.236 | 2.401  |
|             |        |        |        | 1          | -3.602 | 0.484  | 2.086  |
|             |        |        |        | 1          | -4.887 | -0.680 | 1.783  |
|             |        |        |        | 1          | 2.496  | 1.916  | -0.767 |
|             |        |        |        | 1          | 2.857  | -2.117 | 0.653  |
|             |        |        |        | 1          | 4.944  | 2.072  | -0.942 |
|             |        |        |        | 1          | 5.311  | -1.964 | 0.465  |
|             |        |        |        | 1          | 6.370  | 0.136  | -0.328 |
|             |        |        |        | 1          | -4.338 | 0.534  | -2.448 |
| Amoxapine   |        |        |        | Alprazolam |        |        |        |
| 17          | -2.135 | 3.821  | -1.109 | 17         | 1.313  | 4.211  | -0.475 |
| 8           | 1.921  | 0.451  | 1.498  | 7          | -2.202 | -0.528 | 0.050  |
| 7           | -1.447 | -1.388 | 0.089  | 7          | 0.105  | -1.869 | -1.329 |
| 7           | -3.955 | -2.659 | 0.360  | 7          | -3.174 | -2.422 | -0.535 |
| 7           | 0.827  | -1.643 | -0.154 | 7          | -3.800 | -1.938 | 0.596  |
| 6           | -1.595 | -2.809 | -0.218 | 6          | -1.347 | 0.589  | -0.051 |
| 6           | -2.422 | -0.939 | 1.088  | 6          | 0.008  | 0.413  | -0.394 |
| 6           | -3.016 | -3.082 | -0.671 | 6          | -2.229 | -1.580 | -0.845 |
| 6           | -3.828 | -1.230 | 0.606  | 6          | 0.626  | -0.926 | -0.631 |
| 6           | -0.170 | -0.855 | 0.081  | 6          | -1.212 | -1.658 | -1.919 |
| 6           | -0.089 | 0.621  | 0.190  | 6          | -3.227 | -0.810 | 0.935  |
| 6           | 0.967  | 1.226  | 0.878  | 6          | -1.855 | 1.869  | 0.173  |
| 6           | 2.144  | -1.219 | -0.244 | 6          | 0.811  | 1.553  | -0.518 |
| 6           | -1.038 | 1.440  | -0.432 | 6          | 1.964  | -1.177 | -0.038 |
| 6           | 2.715  | -0.230 | 0.575  | 6          | -1.045 | 2.986  | 0.058  |
| 6           | 1.054  | 2.609  | 0.981  | 6          | 0.288  | 2.818  | -0.301 |
| 6           | -0.938 | 2.818  | -0.332 | 6          | -3.585 | 0.007  | 2.116  |
| 6           | 0.095  | 3.415  | 0.384  | 6          | 2.385  | -0.527 | 1.128  |
| 6           | 3.010  | -1.903 | -1.112 | 6          | 2.812  | -2.125 | -0.624 |
| 6           | 4.069  | 0.062  | 0.539  | 6          | 3.622  | -0.816 | 1.693  |
| 6           | 4.363  | -1.606 | -1.167 | 6          | 4.050  | -2.404 | -0.066 |
| 6           | 4.902  | -0.628 | -0.334 | 6          | 4.460  | -1.750 | 1.095  |
| 1           | -1.351 | -3.417 | 0.666  | 1          | -1.452 | -2.496 | -2.572 |
| 1           | -0.876 | -3.066 | -0.995 | 1          | -1.233 | -0.736 | -2.521 |
| 1           | -2.293 | 0.126  | 1.280  | 1          | -2.904 | 1.989  | 0.417  |
| 1           | -2.247 | -1.475 | 2.034  | 1          | 1.856  | 1.441  | -0.784 |
| 1           | -3.184 | -2.563 | -1.633 | 1          | -1.445 | 3.979  | 0.224  |
| 1           | -3.139 | -4.154 | -0.849 | 1          | -4.238 | 0.846  | 1.861  |
| 1           | -4.547 | -0.931 | 1.374  | 1          | -4.124 | -0.624 | 2.821  |
| 1           | -4.027 | -0.620 | -0.296 | 1          | -2.699 | 0.414  | 2.611  |
| 1           | -4.903 | -2.879 | 0.076  | 1          | 1.734  | 0.197  | 1.608  |
| 1           | -1.850 | 0.985  | -0.990 | 1          | 2.474  | -2.634 | -1.520 |
| 1           | 1.880  | 3.041  | 1.535  | 1          | 3.929  | -0.312 | 2.603  |
| 1           | 0.150  | 4.494  | 0.461  | 1          | 4.701  | -3.133 | -0.536 |
| 1           | 2.584  | -2.683 | -1.733 | 1          | 5.428  | -1.971 | 1.531  |
| 1           | 4.453  | 0.826  | 1.207  |            |        |        |        |
| 1           | 5.004  | -2.151 | -1.851 |            |        |        |        |
| 1           | 5.963  | -0.405 | -0.360 |            |        |        |        |
| Amodiaquine |        |        |        | Estradiol  |        |        |        |
| 17          | 6.971  | -0.204 | 0.845  | 8          | -4.871 | -1.233 | 0.198  |
| 8           | -5.017 | 2.412  | -0.302 | 8          | 5.962  | -0.133 | 0.401  |
| 7           | -3.617 | -1.481 | 0.375  | 6          | -2.529 | -0.574 | 0.130  |
| 7           | 0.463  | 1.523  | 0.066  | 6          | -1.851 | 0.708  | -0.381 |
| 7           | 2.734  | -1.678 | -1.513 | 6          | -0.387 | 0.796  | 0.012  |
| 6           | -4.214 | -0.155 | 0.314  | 6          | 0.353  | -0.421 | -0.573 |
| 6           | -3.212 | 0.942  | 0.073  | 6          | -3.947 | -0.327 | -0.390 |
| 6           | -3.258 | -1.949 | -0.967 | 6          | -1.808 | -1.777 | -0.469 |
| 6           | -4.493 | -2.432 | 1.058  | 6          | -2.818 | 1.825  | 0.017  |
| 6           | -1.844 | 0.726  | 0.175  | 6          | -0.310 | -1.743 | -0.162 |
| 6           | -0.923 | 1.749  | -0.064 | 6          | -4.210 | 1.160  | -0.069 |
| 6           | -3.663 | 2.233  | -0.235 | 6          | 0.296  | 2.073  | -0.454 |
| 6           | -2.207 | -3.040 | -0.949 | 6          | -2.559 | -0.669 | 1.658  |
| 6           | -4.522 | -2.239 | 2.561  | 6          | 1.843  | -0.358 | -0.284 |
| 6           | -1.390 | 3.024  | -0.373 | 6          | 1.703  | 2.155  | 0.114  |
| 6           | 1.178  | 0.462  | -0.440 | 6          | 2.477  | 0.865  | 0.004  |
| 6           | -2.757 | 3.266  | -0.443 | 6          | 2.640  | -1.505 | -0.338 |
| 6           | 2.562  | 0.324  | -0.094 | 6          | 3.852  | 0.903  | 0.227  |
| 6           | 3.288  | -0.758 | -0.677 | 6          | 4.009  | -1.468 | -0.115 |
| 6           | 0.636  | -0.492 | -1.289 | 6          | 4.622  | -0.251 | 0.171  |
| 6           | 3.235  | 1.192  | 0.793  | 1          | -1.873 | 0.641  | -1.484 |
| 6           | 4.662  | -0.903 | -0.374 | 1          | -0.310 | 0.756  | 1.111  |
| 6           | 1.453  | -1.519 | -1.779 | 1          | 0.228  | -0.338 | -1.669 |

|                    |        |        |        |         |        |        |        |
|--------------------|--------|--------|--------|---------|--------|--------|--------|
| 6                  | 4.570  | 1.035  | 1.079  | 1       | -3.934 | -0.475 | -1.483 |
| 6                  | 5.277  | -0.021 | 0.476  | 1       | -1.951 | -1.765 | -1.559 |
| 1                  | -4.728 | 0.047  | 1.261  | 1       | -2.249 | -2.714 | -0.110 |
| 1                  | -5.008 | -0.096 | -0.455 | 1       | -2.730 | 2.702  | -0.630 |
| 1                  | -4.158 | -2.281 | -1.520 | 1       | -2.610 | 2.171  | 1.036  |
| 1                  | -2.870 | -1.088 | -1.522 | 1       | -0.132 | -1.916 | 0.907  |
| 1                  | -5.520 | -2.390 | 0.644  | 1       | 0.171  | -2.579 | -0.678 |
| 1                  | -4.124 | -3.437 | 0.838  | 1       | -4.746 | 1.223  | 0.883  |
| 1                  | -1.505 | -0.264 | 0.461  | 1       | -4.852 | 1.628  | -0.821 |
| 1                  | -1.306 | -2.702 | -0.429 | 1       | -0.280 | 2.955  | -0.155 |
| 1                  | -2.556 | -3.947 | -0.450 | 1       | 0.325  | 2.081  | -1.553 |
| 1                  | -1.926 | -3.321 | -1.967 | 1       | -3.133 | -1.546 | 1.962  |
| 1                  | -3.516 | -2.323 | 2.980  | 1       | -1.558 | -0.758 | 2.084  |
| 1                  | -4.921 | -1.264 | 2.850  | 1       | -3.034 | 0.202  | 2.118  |
| 1                  | -5.153 | -2.996 | 3.033  | 1       | 1.643  | 2.430  | 1.177  |
| 1                  | 1.005  | 2.324  | 0.349  | 1       | 2.272  | 2.963  | -0.360 |
| 1                  | -0.687 | 3.830  | -0.563 | 1       | -5.731 | -1.085 | -0.202 |
| 1                  | -3.120 | 4.264  | -0.677 | 1       | 2.186  | -2.464 | -0.564 |
| 1                  | -0.398 | -0.433 | -1.605 | 1       | 4.343  | 1.846  | 0.450  |
| 1                  | 2.697  | 1.991  | 1.294  | 1       | 4.599  | -2.380 | -0.163 |
| 1                  | 5.201  | -1.725 | -0.829 | 1       | 6.366  | -1.001 | 0.323  |
| 1                  | -5.200 | 3.327  | -0.536 |         |        |        |        |
| 1                  | 1.012  | -2.254 | -2.453 |         |        |        |        |
| 1                  | 5.078  | 1.700  | 1.767  |         |        |        |        |
| Diethylstilbestrol |        |        |        | Doxepin |        |        |        |
| 8                  | 6.054  | 0.308  | 0.012  | 8       | 2.822  | 0.433  | 1.410  |
| 8                  | -6.036 | -0.388 | -0.121 | 7       | -4.459 | -0.555 | 0.443  |
| 6                  | 0.454  | -0.504 | 0.260  | 6       | 0.372  | -0.323 | -0.321 |
| 6                  | -0.455 | 0.501  | 0.261  | 6       | 0.414  | 1.157  | -0.397 |
| 6                  | 0.078  | -1.964 | 0.336  | 6       | 1.670  | -1.041 | -0.220 |
| 6                  | -0.079 | 1.961  | 0.343  | 6       | 1.027  | 1.875  | 0.640  |
| 6                  | 1.915  | -0.255 | 0.198  | 6       | -2.165 | -0.458 | -0.530 |
| 6                  | -1.916 | 0.252  | 0.193  | 6       | -0.785 | -1.009 | -0.399 |
| 6                  | 0.471  | -2.755 | -0.907 | 6       | -3.125 | -1.136 | 0.442  |
| 6                  | -0.465 | 2.755  | -0.901 | 6       | 1.610  | 1.099  | 1.774  |
| 6                  | 2.793  | -0.829 | 1.129  | 6       | 2.773  | -0.635 | 0.562  |
| 6                  | -2.795 | 0.824  | 1.119  | 6       | -0.127 | 1.857  | -1.477 |
| 6                  | 2.482  | 0.512  | -0.826 | 6       | 1.082  | 3.265  | 0.588  |
| 6                  | -2.480 | -0.515 | -0.836 | 6       | 1.845  | -2.195 | -1.005 |
| 6                  | 4.163  | -0.629 | 1.063  | 6       | 3.969  | -1.361 | 0.528  |
| 6                  | -4.167 | 0.620  | 1.041  | 6       | -0.069 | 3.245  | -1.523 |
| 6                  | 3.854  | 0.716  | -0.911 | 6       | 0.534  | 3.953  | -0.489 |
| 6                  | -3.847 | -0.723 | -0.932 | 6       | 3.024  | -2.920 | -1.030 |
| 6                  | 4.700  | 0.147  | 0.038  | 6       | 4.100  | -2.491 | -0.256 |
| 6                  | -4.699 | -0.156 | 0.013  | 6       | -5.245 | -1.099 | 1.532  |
| 1                  | 0.590  | -2.407 | 1.202  | 6       | -5.146 | -0.751 | -0.819 |
| 1                  | -0.990 | -2.075 | 0.534  | 1       | -2.521 | -0.611 | -1.559 |
| 1                  | 0.988  | 2.071  | 0.547  | 1       | -2.182 | 0.623  | -0.360 |
| 1                  | -0.595 | 2.402  | 1.206  | 1       | -0.724 | -2.095 | -0.318 |
| 1                  | -0.035 | -2.373 | -1.799 | 1       | -3.161 | -2.226 | 0.225  |
| 1                  | 0.213  | -3.812 | -0.806 | 1       | -2.725 | -1.042 | 1.458  |
| 1                  | 1.547  | -2.691 | -1.094 | 1       | 1.895  | 1.752  | 2.601  |
| 1                  | -0.209 | 3.812  | -0.796 | 1       | 0.894  | 0.356  | 2.154  |
| 1                  | -1.539 | 2.689  | -1.096 | 1       | -0.588 | 1.302  | -2.289 |
| 1                  | 0.048  | 2.375  | -1.791 | 1       | 1.554  | 3.809  | 1.402  |
| 1                  | 2.393  | -1.432 | 1.938  | 1       | 1.021  | -2.496 | -1.644 |
| 1                  | -2.402 | 1.427  | 1.932  | 1       | 4.783  | -1.008 | 1.151  |
| 1                  | 1.832  | 0.945  | -1.580 | 1       | -0.493 | 3.775  | -2.370 |
| 1                  | -1.824 | -0.947 | -1.586 | 1       | 0.579  | 5.037  | -0.522 |
| 1                  | 4.831  | -1.066 | 1.797  | 1       | 3.110  | -3.796 | -1.663 |
| 1                  | -4.828 | 1.063  | 1.783  | 1       | 5.039  | -3.035 | -0.265 |
| 1                  | 4.269  | 1.310  | -1.721 | 1       | -5.406 | -2.191 | 1.446  |
| 1                  | -4.272 | -1.313 | -1.737 | 1       | -6.226 | -0.618 | 1.560  |
| 1                  | 6.287  | 0.860  | -0.741 | 1       | -4.745 | -0.908 | 2.485  |
| 1                  | -6.502 | 0.060  | 0.590  | 1       | -6.149 | -0.323 | -0.760 |
|                    |        |        |        | 1       | -5.249 | -1.820 | -1.090 |
|                    |        |        |        | 1       | -4.62  | -0.245 | -1.632 |

4. Table S4. Cartesian coordinates of optimized geometry of FDA approved drugs...H<sub>2</sub>O at M06L/6-311++G(d,p) level. Atomic number followed by X, Y, Z coordinates in Å.

| cefditoren pivoxil<br>motif 1, Eint = -7.6 kcal/mol |        |        |        | cefditoren pivoxil<br>motif 2, Eint = -9.7 kcal/mol |        |        |        |
|-----------------------------------------------------|--------|--------|--------|-----------------------------------------------------|--------|--------|--------|
| 16                                                  | -0.454 | -3.146 | -0.994 | 16                                                  | 0.849  | -2.528 | 1.291  |
| 16                                                  | 4.386  | -2.531 | 1.713  | 16                                                  | -4.063 | -3.014 | -1.411 |
| 16                                                  | -7.262 | 1.780  | 1.668  | 16                                                  | 7.797  | 0.557  | -2.240 |
| 8                                                   | -0.132 | 1.048  | 0.204  | 8                                                   | -0.051 | 1.311  | -0.518 |
| 8                                                   | 2.786  | 0.461  | 1.040  | 8                                                   | -2.866 | 0.222  | -1.212 |
| 8                                                   | 3.426  | 0.478  | -1.134 | 8                                                   | -3.480 | 0.473  | 0.954  |
| 8                                                   | -3.843 | -1.210 | 1.932  | 8                                                   | 3.889  | -1.788 | -1.390 |

|                                                     |        |        |        |                                                     |        |        |        |
|-----------------------------------------------------|--------|--------|--------|-----------------------------------------------------|--------|--------|--------|
| 8                                                   | 2.839  | 2.718  | 0.622  | 8                                                   | -3.192 | 2.491  | -1.112 |
| 8                                                   | -4.059 | -2.197 | -1.737 | 8                                                   | 3.808  | -0.917 | 2.177  |
| 8                                                   | 4.706  | 3.331  | -0.506 | 8                                                   | -5.099 | 3.030  | -0.011 |
| 7                                                   | 0.741  | -1.147 | 0.369  | 7                                                   | -0.611 | -0.985 | -0.367 |
| 7                                                   | -2.500 | -1.092 | 0.107  | 7                                                   | 2.581  | -0.375 | -0.190 |
| 7                                                   | -5.110 | -1.369 | -1.330 | 7                                                   | 4.983  | -0.436 | 1.610  |
| 7                                                   | -7.111 | 0.228  | -0.403 | 7                                                   | 7.167  | 0.567  | 0.277  |
| 7                                                   | 6.051  | -0.587 | 1.977  | 7                                                   | -5.967 | -1.351 | -1.893 |
| 7                                                   | -9.086 | 1.514  | -0.353 | 7                                                   | 9.240  | 1.596  | -0.163 |
| 6                                                   | -0.230 | -2.219 | 0.552  | 6                                                   | 0.511  | -1.919 | -0.384 |
| 6                                                   | -1.294 | -1.127 | 0.854  | 6                                                   | 1.398  | -0.745 | -0.891 |
| 6                                                   | -0.200 | -0.131 | 0.448  | 6                                                   | 0.177  | 0.130  | -0.608 |
| 6                                                   | 1.953  | -1.237 | -0.312 | 6                                                   | -1.799 | -1.137 | 0.346  |
| 6                                                   | 1.328  | -3.522 | -1.136 | 6                                                   | -0.854 | -3.159 | 1.485  |
| 6                                                   | 2.282  | -2.365 | -0.988 | 6                                                   | -1.967 | -2.187 | 1.187  |
| 6                                                   | 2.812  | -0.019 | -0.227 | 6                                                   | -2.814 | -0.069 | 0.111  |
| 6                                                   | 3.589  | -2.575 | -1.602 | 6                                                   | -3.229 | -2.480 | 1.856  |
| 6                                                   | -3.717 | -1.068 | 0.730  | 6                                                   | 3.767  | -0.964 | -0.495 |
| 6                                                   | -4.906 | -0.830 | -0.171 | 6                                                   | 4.943  | -0.471 | 0.318  |
| 6                                                   | 4.797  | -2.326 | -1.065 | 6                                                   | -4.465 | -2.472 | 1.323  |
| 6                                                   | 3.520  | 1.663  | 1.251  | 6                                                   | -3.747 | 1.282  | -1.565 |
| 6                                                   | 2.558  | 4.267  | -1.158 | 6                                                   | -3.062 | 4.281  | 0.444  |
| 6                                                   | 5.095  | -1.853 | 0.276  | 6                                                   | -4.837 | -2.234 | -0.062 |
| 6                                                   | -5.949 | 0.065  | 0.324  | 6                                                   | 6.122  | -0.015 | -0.408 |
| 6                                                   | 3.519  | 3.420  | -0.342 | 6                                                   | -3.933 | 3.230  | -0.223 |
| 6                                                   | 3.356  | 5.327  | -1.911 | 6                                                   | -3.963 | 5.317  | 1.108  |
| 6                                                   | 1.875  | 3.314  | -2.154 | 6                                                   | -2.228 | 3.546  | 1.506  |
| 6                                                   | 1.497  | 4.919  | -0.269 | 6                                                   | -2.126 | 4.947  | -0.567 |
| 6                                                   | 5.959  | -0.836 | 0.630  | 6                                                   | -5.827 | -1.394 | -0.528 |
| 6                                                   | -5.855 | 0.807  | 1.470  | 6                                                   | 6.281  | -0.113 | -1.766 |
| 6                                                   | 6.720  | 0.013  | -0.327 | 6                                                   | -6.680 | -0.521 | 0.324  |
| 6                                                   | -7.889 | 1.086  | 0.174  | 6                                                   | 8.108  | 0.913  | -0.543 |
| 6                                                   | 5.292  | -1.395 | 2.652  | 6                                                   | -5.118 | -2.146 | -2.472 |
| 6                                                   | -4.413 | -2.799 | -2.975 | 6                                                   | 3.871  | -0.766 | 3.586  |
| 1                                                   | 0.034  | -2.897 | 1.369  | 1                                                   | 0.362  | -2.753 | -1.075 |
| 1                                                   | -1.560 | -1.079 | 1.914  | 1                                                   | 1.620  | -0.868 | -1.955 |
| 1                                                   | 1.581  | -4.314 | -0.420 | 1                                                   | -0.973 | -4.069 | 0.882  |
| 1                                                   | 1.456  | -3.964 | -2.128 | 1                                                   | -0.933 | -3.479 | 2.528  |
| 1                                                   | -2.469 | -1.045 | -0.902 | 1                                                   | 2.491  | 0.215  | 0.639  |
| 1                                                   | 3.566  | -3.001 | -2.604 | 1                                                   | -3.142 | -2.755 | 2.906  |
| 1                                                   | 5.664  | -2.473 | -1.708 | 1                                                   | -5.298 | -2.644 | 2.003  |
| 1                                                   | 4.537  | 1.576  | 0.863  | 1                                                   | -4.740 | 1.130  | -1.137 |
| 1                                                   | 3.509  | 1.813  | 2.329  | 1                                                   | -3.771 | 1.279  | -2.654 |
| 1                                                   | 2.685  | 5.917  | -2.542 | 1                                                   | -3.352 | 6.056  | 1.635  |
| 1                                                   | 3.862  | 6.010  | -1.225 | 1                                                   | -4.574 | 5.846  | 0.372  |
| 1                                                   | 4.118  | 4.874  | -2.547 | 1                                                   | -4.640 | 4.853  | 1.827  |
| 1                                                   | 1.200  | 3.887  | -2.797 | 1                                                   | -1.595 | 4.267  | 2.033  |
| 1                                                   | 1.290  | 2.552  | -1.635 | 1                                                   | -1.586 | 2.790  | 1.049  |
| 1                                                   | 2.609  | 2.811  | -2.789 | 1                                                   | -2.866 | 3.051  | 2.242  |
| 1                                                   | 0.842  | 5.543  | -0.884 | 1                                                   | -1.539 | 5.720  | -0.064 |
| 1                                                   | 1.947  | 5.562  | 0.493  | 1                                                   | -2.682 | 5.429  | -1.376 |
| 1                                                   | 0.882  | 4.171  | 0.235  | 1                                                   | -1.436 | 4.226  | -1.009 |
| 1                                                   | -5.049 | 0.834  | 2.185  | 1                                                   | 5.625  | -0.577 | -2.483 |
| 1                                                   | 6.308  | 1.027  | -0.368 | 1                                                   | -6.411 | 0.534  | 0.204  |
| 1                                                   | 7.764  | 0.098  | -0.019 | 1                                                   | -7.732 | -0.622 | 0.047  |
| 1                                                   | 6.677  | -0.388 | -1.341 | 1                                                   | -6.565 | -0.759 | 1.383  |
| 1                                                   | 5.215  | -1.394 | 3.733  | 1                                                   | -5.054 | -2.288 | -3.544 |
| 1                                                   | -5.298 | -3.430 | -2.860 | 1                                                   | 4.707  | -1.334 | 4.005  |
| 1                                                   | -4.604 | -2.040 | -3.738 | 1                                                   | 3.970  | 0.288  | 3.863  |
| 1                                                   | -3.554 | -3.408 | -3.258 | 1                                                   | 2.924  | -1.156 | 3.958  |
| 1                                                   | -9.428 | 0.892  | -1.073 | 1                                                   | 9.405  | 1.540  | 0.833  |
| 1                                                   | -9.800 | 1.759  | 0.317  | 1                                                   | 10.071 | 1.414  | -0.707 |
| 8                                                   | -2.814 | 1.825  | 0.949  | 8                                                   | 1.746  | 1.651  | 1.722  |
| 1                                                   | -3.152 | 2.689  | 0.706  | 1                                                   | 2.292  | 2.399  | 1.975  |
| 1                                                   | -1.894 | 1.823  | 0.645  | 1                                                   | 1.114  | 2.006  | 1.081  |
| cefditoren pivoxil<br>motif 3, Eint = -7.8 kcal/mol |        |        |        | cefditoren pivoxil<br>motif 4, Eint = -8.3 kcal/mol |        |        |        |
| 16                                                  | 1.013  | -2.727 | 1.143  | 16                                                  | 0.897  | -2.602 | 1.387  |
| 16                                                  | -3.632 | -2.965 | -1.710 | 16                                                  | -3.588 | -2.873 | -1.484 |
| 16                                                  | 7.910  | 1.443  | -1.902 | 16                                                  | 7.788  | 1.462  | -1.966 |
| 8                                                   | 0.107  | 1.355  | -0.078 | 8                                                   | 0.080  | 1.462  | -0.095 |
| 8                                                   | -2.707 | 0.314  | -1.001 | 8                                                   | -2.743 | 0.392  | -0.916 |
| 8                                                   | -3.469 | 0.190  | 1.128  | 8                                                   | -3.543 | 0.439  | 1.202  |
| 8                                                   | 4.083  | -1.042 | -1.751 | 8                                                   | 3.977  | -1.031 | -1.707 |
| 8                                                   | -3.392 | 2.484  | -0.617 | 8                                                   | -3.252 | 2.622  | -0.717 |
| 8                                                   | 4.157  | -1.423 | 2.022  | 8                                                   | 4.147  | -1.396 | 2.067  |
| 8                                                   | -5.421 | 2.514  | 0.393  | 8                                                   | -5.272 | 2.951  | 0.255  |
| 7                                                   | -0.452 | -0.941 | -0.247 | 7                                                   | -0.532 | -0.829 | -0.040 |
| 7                                                   | 2.762  | -0.410 | -0.017 | 7                                                   | 2.693  | -0.396 | 0.057  |
| 7                                                   | 5.304  | -0.806 | 1.522  | 7                                                   | 5.276  | -0.774 | 1.533  |
| 7                                                   | 7.421  | 0.532  | 0.477  | 7                                                   | 7.353  | 0.580  | 0.433  |
| 7                                                   | -5.665 | -1.450 | -2.151 | 7                                                   | -5.551 | -1.330 | -2.108 |
| 7                                                   | 9.488  | 1.650  | 0.320  | 7                                                   | 9.408  | 1.711  | 0.222  |
| 6                                                   | 0.661  | -1.864 | -0.418 | 6                                                   | 0.537  | -1.795 | -0.207 |



|                                                     |        |        |        |                                                     |        |        |        |
|-----------------------------------------------------|--------|--------|--------|-----------------------------------------------------|--------|--------|--------|
| 6                                                   | 1.554  | -0.633 | -0.739 | 6                                                   | 1.460  | -0.617 | -0.623 |
| 6                                                   | 0.338  | 0.201  | -0.322 | 6                                                   | 0.282  | 0.288  | -0.233 |
| 6                                                   | -1.652 | -1.212 | 0.407  | 6                                                   | -1.734 | -1.044 | 0.618  |
| 6                                                   | -0.692 | -3.365 | 1.275  | 6                                                   | -0.826 | -3.174 | 1.590  |
| 6                                                   | -1.813 | -2.375 | 1.085  | 6                                                   | -1.926 | -2.173 | 1.344  |
| 6                                                   | -2.713 | -0.172 | 0.266  | 6                                                   | -2.776 | -0.005 | 0.392  |
| 6                                                   | -3.091 | -2.806 | 1.643  | 6                                                   | -3.229 | -2.565 | 1.873  |
| 6                                                   | 3.974  | -0.679 | -0.592 | 6                                                   | 3.889  | -0.663 | -0.548 |
| 6                                                   | 5.179  | -0.439 | 0.286  | 6                                                   | 5.116  | -0.413 | 0.300  |
| 6                                                   | -4.286 | -2.810 | 1.026  | 6                                                   | -4.394 | -2.587 | 1.199  |
| 6                                                   | -3.704 | 1.287  | -1.291 | 6                                                   | -3.677 | 1.410  | -1.273 |
| 6                                                   | -3.692 | 4.052  | 1.153  | 6                                                   | -3.383 | 4.333  | 0.926  |
| 6                                                   | -4.579 | -2.439 | -0.348 | 6                                                   | -4.607 | -2.276 | -0.205 |
| 6                                                   | 6.328  | 0.239  | -0.310 | 6                                                   | 6.246  | 0.268  | -0.328 |
| 6                                                   | -4.305 | 2.946  | 0.315  | 6                                                   | -4.115 | 3.255  | 0.148  |
| 6                                                   | -4.718 | 4.490  | 2.194  | 6                                                   | -4.411 | 5.234  | 1.604  |
| 6                                                   | -2.430 | 3.516  | 1.843  | 6                                                   | -2.531 | 3.612  | 1.983  |
| 6                                                   | -3.327 | 5.231  | 0.241  | 6                                                   | -2.472 | 5.150  | 0.006  |
| 6                                                   | -5.620 | -1.650 | -0.793 | 6                                                   | -5.598 | -1.482 | -0.744 |
| 6                                                   | 6.411  | 0.644  | -1.617 | 6                                                   | 6.301  | 0.656  | -1.641 |
| 6                                                   | -6.619 | -0.975 | 0.079  | 6                                                   | -6.639 | -0.762 | 0.039  |
| 6                                                   | 8.323  | 1.155  | -0.213 | 6                                                   | 8.236  | 1.199  | -0.283 |
| 6                                                   | -4.697 | -2.078 | -2.746 | 6                                                   | -4.560 | -2.000 | -2.616 |
| 6                                                   | 4.420  | -1.862 | 3.350  | 6                                                   | 4.450  | -1.829 | 3.388  |
| 1                                                   | 0.499  | -2.585 | -1.224 | 1                                                   | 0.320  | -2.539 | -0.978 |
| 1                                                   | 1.780  | -0.573 | -1.806 | 1                                                   | 1.645  | -0.627 | -1.699 |
| 1                                                   | -0.814 | -4.204 | 0.577  | 1                                                   | -0.985 | -4.054 | 0.953  |
| 1                                                   | -0.768 | -3.798 | 2.277  | 1                                                   | -0.898 | -3.534 | 2.621  |
| 1                                                   | 2.724  | -0.314 | 0.990  | 1                                                   | 2.686  | -0.280 | 1.062  |
| 1                                                   | -3.050 | -3.189 | 2.661  | 1                                                   | -3.238 | -2.901 | 2.908  |
| 1                                                   | -5.151 | -3.101 | 1.620  | 1                                                   | -5.291 | -2.842 | 1.761  |
| 1                                                   | -4.693 | 0.936  | -0.995 | 1                                                   | -4.680 | 1.154  | -0.928 |
| 1                                                   | -3.631 | 1.452  | -2.365 | 1                                                   | -3.629 | 1.466  | -2.361 |
| 1                                                   | -4.297 | 5.286  | 2.813  | 1                                                   | -3.901 | 5.990  | 2.206  |
| 1                                                   | -5.628 | 4.867  | 1.724  | 1                                                   | -5.037 | 5.750  | 0.871  |
| 1                                                   | -5.002 | 3.662  | 2.846  | 1                                                   | -5.072 | 4.661  | 2.257  |
| 1                                                   | -2.003 | 4.301  | 2.474  | 1                                                   | -2.006 | 4.355  | 2.591  |
| 1                                                   | -1.668 | 3.212  | 1.122  | 1                                                   | -1.785 | 2.965  | 1.516  |
| 1                                                   | -2.659 | 2.657  | 2.479  | 1                                                   | -3.150 | 3.003  | 2.646  |
| 1                                                   | -2.946 | 6.053  | 0.853  | 1                                                   | -1.985 | 5.939  | 0.587  |
| 1                                                   | -4.202 | 5.602  | -0.302 | 1                                                   | -3.036 | 5.631  | -0.798 |
| 1                                                   | -2.553 | 4.971  | -0.483 | 1                                                   | -1.695 | 4.530  | -0.442 |
| 1                                                   | 5.706  | 0.484  | -2.415 | 1                                                   | 5.581  | 0.476  | -2.422 |
| 1                                                   | -6.431 | 0.103  | 0.133  | 1                                                   | -6.442 | 0.315  | 0.069  |
| 1                                                   | -7.627 | -1.111 | -0.316 | 1                                                   | -7.623 | -0.898 | -0.415 |
| 1                                                   | -6.581 | -1.355 | 1.101  | 1                                                   | -6.674 | -1.106 | 1.073  |
| 1                                                   | -4.542 | -2.078 | -3.819 | 1                                                   | -4.332 | -2.041 | -3.675 |
| 1                                                   | 5.219  | -2.608 | 3.360  | 1                                                   | 5.250  | -2.573 | 3.377  |
| 1                                                   | 4.697  | -1.021 | 3.990  | 1                                                   | 4.744  | -0.985 | 4.017  |
| 1                                                   | 3.488  | -2.308 | 3.698  | 1                                                   | 3.530  | -2.276 | 3.764  |
| 1                                                   | 9.706  | 1.241  | 1.219  | 1                                                   | 9.645  | 1.314  | 1.121  |
| 1                                                   | 10.283 | 1.687  | -0.299 | 1                                                   | 10.192 | 1.737  | -0.413 |
| 8                                                   | -0.873 | 3.495  | -1.804 | 8                                                   | -0.854 | -0.775 | -2.972 |
| 1                                                   | -1.696 | 3.202  | -1.396 | 1                                                   | -1.510 | -0.392 | -2.374 |
| 1                                                   | -0.214 | 2.999  | 1.307  | 1                                                   | -0.865 | -0.204 | -3.743 |
| cefditoren pivoxil<br>motif 5, Eint = -9.8 kcal/mol |        |        |        | cefditoren pivoxil<br>motif 6, Eint = -9.2 kcal/mol |        |        |        |
| 16                                                  | 1.088  | -2.479 | 1.353  | 16                                                  | 0.895  | -2.228 | 1.591  |
| 16                                                  | -3.535 | -3.127 | -1.549 | 16                                                  | -3.915 | -3.080 | -1.128 |
| 16                                                  | 8.122  | 1.184  | -2.003 | 16                                                  | 7.931  | 0.717  | -2.019 |
| 8                                                   | 0.222  | 1.365  | -0.478 | 8                                                   | -0.117 | 1.470  | -0.471 |
| 8                                                   | -2.544 | 0.234  | -1.308 | 8                                                   | -2.892 | 0.215  | -1.114 |
| 8                                                   | -3.356 | 0.386  | 0.792  | 8                                                   | -3.559 | 0.575  | 1.021  |
| 8                                                   | 4.267  | -1.231 | -1.632 | 8                                                   | 3.983  | -1.417 | -1.219 |
| 8                                                   | -3.168 | 2.452  | -1.163 | 8                                                   | -3.345 | 2.464  | -1.178 |
| 8                                                   | 4.184  | -1.017 | 2.160  | 8                                                   | 3.763  | -0.227 | 2.386  |
| 8                                                   | -5.203 | 2.625  | -0.189 | 8                                                   | -5.310 | 2.970  | -0.170 |
| 7                                                   | -0.330 | -0.941 | -0.356 | 7                                                   | -0.605 | -0.832 | -0.161 |
| 7                                                   | 2.876  | -0.353 | -0.068 | 7                                                   | 2.571  | -0.126 | 0.002  |
| 7                                                   | 5.352  | -0.486 | 1.614  | 7                                                   | 4.973  | 0.096  | 1.779  |
| 7                                                   | 7.508  | 0.689  | 0.467  | 7                                                   | 7.252  | 0.778  | 0.483  |
| 7                                                   | -5.519 | -1.640 | -2.239 | 7                                                   | -5.897 | -1.564 | -1.760 |
| 7                                                   | 9.582  | 1.780  | 0.229  | 7                                                   | 9.403  | 1.650  | 0.086  |
| 6                                                   | 0.795  | -1.864 | -0.334 | 6                                                   | 0.544  | -1.729 | -0.123 |
| 6                                                   | 1.698  | -0.685 | -0.795 | 6                                                   | 1.396  | -0.562 | -0.688 |
| 6                                                   | 0.464  | 0.194  | -0.551 | 6                                                   | 0.146  | 0.300  | -0.468 |
| 6                                                   | -1.541 | -1.112 | 0.309  | 6                                                   | -1.794 | -0.990 | 0.544  |
| 6                                                   | -0.619 | -3.107 | 1.515  | 6                                                   | -0.787 | -2.903 | 1.815  |
| 6                                                   | -1.730 | -2.156 | 1.155  | 6                                                   | -1.932 | -1.994 | 1.445  |
| 6                                                   | -2.582 | -0.093 | 0.001  | 6                                                   | -2.852 | 0.014  | 0.226  |
| 6                                                   | -3.023 | -2.482 | 1.749  | 6                                                   | -3.193 | -2.302 | 2.110  |
| 6                                                   | 4.110  | -0.697 | -0.547 | 6                                                   | 3.798  | -0.614 | -0.309 |
| 6                                                   | 5.279  | -0.319 | 0.332  | 6                                                   | 4.955  | -0.072 | 0.495  |
| 6                                                   | -4.213 | -2.554 | 1.124  | 6                                                   | -4.415 | -2.387 | 1.554  |

|                                                     |        |        |        |                                                      |        |        |        |
|-----------------------------------------------------|--------|--------|--------|------------------------------------------------------|--------|--------|--------|
| 6                                                   | -3.502 | 1.207  | -1.722 | 6                                                    | -3.822 | 1.197  | -1.555 |
| 6                                                   | -3.424 | 4.142  | 0.488  | 6                                                    | -3.371 | 4.384  | 0.222  |
| 6                                                   | -4.483 | -2.382 | -0.293 | 6                                                    | -4.765 | -2.260 | 0.149  |
| 6                                                   | 6.457  | 0.258  | -0.314 | 6                                                    | 6.182  | 0.269  | -0.221 |
| 6                                                   | -4.067 | 3.014  | -0.295 | 6                                                    | -4.154 | 3.227  | -0.373 |
| 6                                                   | -4.512 | 4.922  | 1.218  | 6                                                    | -4.356 | 5.430  | 0.737  |
| 6                                                   | -2.471 | 3.494  | 1.507  | 6                                                    | -2.558 | 3.804  | 1.391  |
| 6                                                   | -2.631 | 5.060  | -0.447 | 6                                                    | -2.416 | 4.999  | -0.804 |
| 6                                                   | -5.496 | -1.640 | -0.865 | 6                                                    | -5.788 | -1.509 | -0.392 |
| 6                                                   | 6.609  | 0.434  | -1.664 | 6                                                    | 6.364  | 0.156  | -1.575 |
| 6                                                   | -6.487 | -0.820 | -0.117 | 6                                                    | -6.708 | -0.630 | 0.382  |
| 6                                                   | 8.446  | 1.191  | -0.272 | 6                                                    | 8.232  | 1.054  | -0.316 |
| 6                                                   | -4.562 | -2.373 | -2.720 | 6                                                    | -4.990 | -2.345 | -2.266 |
| 6                                                   | 4.392  | -1.241 | 3.551  | 6                                                    | 3.909  | -0.099 | 3.797  |
| 1                                                   | 0.678  | -2.702 | -1.028 | 1                                                    | 0.447  | -2.602 | -0.771 |
| 1                                                   | 1.964  | -0.780 | -1.851 | 1                                                    | 1.630  | -0.731 | -1.742 |
| 1                                                   | -0.715 | -4.034 | 0.934  | 1                                                    | -0.864 | -3.851 | 1.269  |
| 1                                                   | -0.728 | -3.399 | 2.564  | 1                                                    | -0.865 | -3.159 | 2.876  |
| 1                                                   | 2.797  | -0.096 | 0.907  | 1                                                    | 2.468  | 0.367  | 0.880  |
| 1                                                   | -3.001 | -2.715 | 2.813  | 1                                                    | -3.116 | -2.504 | 3.178  |
| 1                                                   | -5.088 | -2.738 | 1.744  | 1                                                    | -5.255 | -2.551 | 2.228  |
| 1                                                   | -4.509 | 0.908  | -1.425 | 1                                                    | -4.813 | 1.018  | -1.136 |
| 1                                                   | -3.395 | 1.259  | -2.804 | 1                                                    | -3.821 | 1.117  | -2.641 |
| 1                                                   | -4.059 | 5.735  | 1.791  | 1                                                    | -3.811 | 6.249  | 1.213  |
| 1                                                   | -5.232 | 5.359  | 0.521  | 1                                                    | -4.956 | 5.849  | -0.075 |
| 1                                                   | -5.060 | 4.284  | 1.913  | 1                                                    | -5.044 | 5.002  | 1.468  |
| 1                                                   | -1.989 | 4.280  | 2.095  | 1                                                    | -2.008 | 4.611  | 1.884  |
| 1                                                   | -1.693 | 2.912  | 1.010  | 1                                                    | -1.838 | 3.062  | 1.041  |
| 1                                                   | -3.016 | 2.842  | 2.194  | 1                                                    | -3.209 | 3.330  | 2.131  |
| 1                                                   | -2.201 | 5.881  | 0.133  | 1                                                    | -1.895 | 5.848  | -0.351 |
| 1                                                   | -3.269 | 5.499  | -1.220 | 1                                                    | -2.952 | 5.370  | -1.683 |
| 1                                                   | -1.815 | 4.527  | -0.938 | 1                                                    | -1.668 | 4.278  | -1.137 |
| 1                                                   | 5.946  | 0.133  | -2.458 | 1                                                    | 5.691  | -0.249 | -2.312 |
| 1                                                   | -6.308 | 0.249  | -0.274 | 1                                                    | -6.492 | 0.427  | 0.197  |
| 1                                                   | -7.501 | -1.031 | -0.465 | 1                                                    | -7.746 | -0.806 | 0.089  |
| 1                                                   | -6.435 | -0.994 | 0.958  | 1                                                    | -6.607 | -0.792 | 1.456  |
| 1                                                   | -4.396 | -2.535 | -3.779 | 1                                                    | -4.891 | -2.552 | -3.325 |
| 1                                                   | 5.184  | -1.976 | 3.709  | 1                                                    | 4.658  | -0.800 | 4.171  |
| 1                                                   | 4.650  | -0.309 | 4.060  | 1                                                    | 4.192  | 0.921  | 4.067  |
| 1                                                   | 3.444  | -1.625 | 3.926  | 1                                                    | 2.930  | -0.340 | 4.211  |
| 1                                                   | 9.751  | 1.533  | 1.195  | 1                                                    | 9.542  | 1.593  | 1.086  |
| 1                                                   | 10.409 | 1.714  | -0.344 | 1                                                    | 10.230 | 1.415  | -0.441 |
| 8                                                   | -5.461 | 1.437  | 2.537  | 8                                                    | 2.053  | -3.092 | -2.446 |
| 1                                                   | -4.707 | 0.933  | 2.210  | 1                                                    | 2.823  | -2.621 | -2.086 |
| 1                                                   | -5.735 | 1.916  | 1.746  | 1                                                    | 2.424  | -3.776 | -3.006 |
| cefditoren pivoxil<br>motif 7, Eint = -7.1 kcal/mol |        |        |        | cefditoren pivoxil<br>motif 8, Eint = -12.0 kcal/mol |        |        |        |
| 16                                                  | 0.925  | -2.754 | 1.152  | 16                                                   | 0.663  | -2.609 | 1.107  |
| 16                                                  | -3.855 | -2.869 | -1.660 | 16                                                   | -4.233 | -2.905 | -1.496 |
| 16                                                  | 7.887  | 1.296  | -1.898 | 16                                                   | 7.614  | 1.166  | -2.359 |
| 8                                                   | 0.040  | 1.331  | -0.247 | 8                                                    | -0.236 | 1.392  | -0.351 |
| 8                                                   | -2.731 | 0.344  | -0.990 | 8                                                    | -3.098 | 0.342  | -1.086 |
| 8                                                   | -3.452 | 0.271  | 1.157  | 8                                                    | -3.703 | 0.422  | 1.095  |
| 8                                                   | 4.037  | -1.148 | -1.731 | 8                                                    | 3.680  | -1.109 | -1.977 |
| 8                                                   | -3.162 | 2.560  | -0.567 | 8                                                    | -3.542 | 2.584  | -0.837 |
| 8                                                   | 4.037  | -1.391 | 2.058  | 8                                                    | 3.829  | -1.191 | 1.854  |
| 8                                                   | -5.163 | 2.849  | 0.456  | 8                                                    | -5.483 | 2.949  | 0.272  |
| 7                                                   | -0.517 | -0.972 | -0.263 | 7                                                    | -0.830 | -0.907 | -0.365 |
| 7                                                   | 2.685  | -0.454 | -0.044 | 7                                                    | 2.396  | -0.401 | -0.245 |
| 7                                                   | 5.195  | -0.798 | 1.556  | 7                                                    | 4.969  | -0.650 | 1.263  |
| 7                                                   | 7.331  | 0.505  | 0.508  | 7                                                    | 7.089  | 0.492  | 0.083  |
| 7                                                   | -5.780 | -1.197 | -2.008 | 7                                                    | -6.194 | -1.281 | -1.874 |
| 7                                                   | 9.403  | 1.613  | 0.353  | 7                                                    | 9.203  | 1.486  | -0.153 |
| 6                                                   | 0.584  | -1.910 | -0.421 | 6                                                    | 0.272  | -1.848 | -0.499 |
| 6                                                   | 1.488  | -0.696 | -0.779 | 6                                                    | 1.169  | -0.652 | -0.924 |
| 6                                                   | 0.271  | 0.161  | -0.408 | 6                                                    | -0.027 | 0.226  | -0.529 |
| 6                                                   | -1.717 | -1.213 | 0.401  | 6                                                    | -2.000 | -1.111 | 0.361  |
| 6                                                   | -0.790 | -3.373 | 1.282  | 6                                                    | -1.044 | -3.218 | 1.331  |
| 6                                                   | -1.896 | -2.365 | 1.092  | 6                                                    | -2.154 | -2.219 | 1.127  |
| 6                                                   | -2.739 | -0.131 | 0.275  | 6                                                    | -3.031 | -0.042 | 0.212  |
| 6                                                   | -3.173 | -2.755 | 1.677  | 6                                                    | -3.406 | -2.565 | 1.791  |
| 6                                                   | 3.906  | -0.745 | -0.587 | 6                                                    | 3.594  | -0.691 | -0.835 |
| 6                                                   | 5.095  | -0.477 | 0.306  | 6                                                    | 4.821  | -0.404 | -0.001 |
| 6                                                   | -4.388 | -2.697 | 1.100  | 6                                                    | -4.645 | -2.545 | 1.266  |
| 6                                                   | -3.626 | 1.422  | -1.255 | 6                                                    | -4.031 | 1.379  | -1.368 |
| 6                                                   | -3.235 | 4.128  | 1.209  | 6                                                    | -3.533 | 4.304  | 0.801  |
| 6                                                   | -4.708 | -2.290 | -0.258 | 6                                                    | -5.027 | -2.233 | -0.101 |
| 6                                                   | 6.259  | 0.173  | -0.293 | 6                                                    | 5.981  | 0.177  | -0.672 |
| 6                                                   | -3.999 | 3.130  | 0.354  | 6                                                    | -4.331 | 3.232  | 0.080  |
| 6                                                   | -4.235 | 4.986  | 1.977  | 6                                                    | -4.503 | 5.239  | 1.518  |
| 6                                                   | -2.376 | 3.312  | 2.188  | 6                                                    | -2.645 | 3.578  | 1.825  |
| 6                                                   | -2.327 | 5.006  | 0.343  | 6                                                    | -2.651 | 5.087  | -0.174 |
| 6                                                   | -5.698 | -1.416 | -0.655 | 6                                                    | -6.047 | -1.401 | -0.514 |
| 6                                                   | 6.379  | 0.513  | -1.615 | 6                                                    | 6.079  | 0.461  | -2.008 |

|                                                     |        |        |        |                                             |        |        |        |
|-----------------------------------------------------|--------|--------|--------|---------------------------------------------|--------|--------|--------|
| 6                                                   | -6.604 | -0.672 | 0.262  | 6                                           | -6.926 | -0.609 | 0.390  |
| 6                                                   | 8.253  | 1.092  | -0.187 | 6                                           | 8.027  | 1.015  | -0.654 |
| 6                                                   | -4.885 | -1.889 | -2.646 | 6                                           | -5.321 | -2.010 | -2.501 |
| 6                                                   | 4.274  | -1.783 | 3.406  | 6                                           | 4.121  | -1.507 | 3.210  |
| 1                                                   | 0.409  | -2.642 | -1.214 | 1                                           | 0.088  | -2.622 | -1.250 |
| 1                                                   | 1.730  | -0.674 | -1.844 | 1                                           | 1.370  | -0.663 | -1.997 |
| 1                                                   | -0.919 | -4.209 | 0.583  | 1                                           | -1.197 | -4.090 | 0.682  |
| 1                                                   | -0.871 | -3.805 | 2.283  | 1                                           | -1.089 | -3.596 | 2.356  |
| 1                                                   | 2.630  | -0.327 | 0.958  | 1                                           | 2.381  | -0.235 | 0.753  |
| 1                                                   | -3.119 | -3.159 | 2.687  | 1                                           | -3.307 | -2.898 | 2.823  |
| 1                                                   | -5.243 | -2.961 | 1.719  | 1                                           | -5.472 | -2.764 | 1.939  |
| 1                                                   | -4.641 | 1.172  | -0.942 | 1                                           | -5.013 | 1.147  | -0.952 |
| 1                                                   | -3.536 | 1.595  | -2.325 | 1                                           | -4.057 | 1.445  | -2.455 |
| 1                                                   | -3.702 | 5.683  | 2.629  | 1                                           | -3.944 | 5.992  | 2.080  |
| 1                                                   | -4.866 | 5.569  | 1.301  | 1                                           | -5.155 | 5.759  | 0.811  |
| 1                                                   | -4.894 | 4.372  | 2.593  | 1                                           | -5.141 | 4.692  | 2.214  |
| 1                                                   | -1.827 | 3.993  | 2.844  | 1                                           | -2.077 | 4.316  | 2.397  |
| 1                                                   | -1.653 | 2.690  | 1.656  | 1                                           | -1.938 | 2.908  | 1.331  |
| 1                                                   | -2.994 | 2.661  | 2.811  | 1                                           | -3.245 | 2.990  | 2.524  |
| 1                                                   | -1.817 | 5.739  | 0.975  | 1                                           | -2.118 | 5.872  | 0.370  |
| 1                                                   | -2.898 | 5.557  | -0.411 | 1                                           | -3.244 | 5.570  | -0.956 |
| 1                                                   | -1.568 | 4.413  | -0.170 | 1                                           | -1.912 | 4.443  | -0.653 |
| 1                                                   | 5.695  | 0.312  | -2.424 | 1                                           | 5.364  | 0.261  | -2.789 |
| 1                                                   | -6.341 | 0.391  | 0.297  | 1                                           | -6.707 | 0.462  | 0.314  |
| 1                                                   | -7.639 | -0.741 | -0.080 | 1                                           | -7.976 | -0.745 | 0.122  |
| 1                                                   | -6.538 | -1.049 | 1.284  | 1                                           | -6.784 | -0.889 | 1.434  |
| 1                                                   | -4.769 | -1.885 | -3.723 | 1                                           | -5.257 | -2.085 | -3.580 |
| 1                                                   | 5.067  | -2.533 | 3.456  | 1                                           | 4.924  | -2.246 | 3.270  |
| 1                                                   | 4.547  | -0.921 | 4.020  | 1                                           | 4.404  | -0.610 | 3.767  |
| 1                                                   | 3.334  | -2.210 | 3.753  | 1                                           | 3.198  | -1.923 | 3.614  |
| 1                                                   | 9.596  | 1.248  | 1.276  | 1                                           | 9.389  | 1.167  | 0.799  |
| 1                                                   | 10.216 | 1.617  | -0.245 | 1                                           | 9.998  | 1.494  | -0.771 |
| 8                                                   | -1.096 | 2.206  | -2.838 | 8                                           | 8.647  | 0.195  | 2.396  |
| 1                                                   | -0.857 | 2.116  | -1.906 | 1                                           | 8.358  | 0.546  | 3.241  |
| 1                                                   | -0.827 | 3.100  | -3.058 | 1                                           | 7.837  | 0.140  | 1.853  |
| cefditoren pivoxil<br>motif 9, Eint = -9.8 kcal/mol |        |        |        | Amlodipine<br>motif 1, Eint = -6.4 kcal/mol |        |        |        |
| 16                                                  | 1.235  | -2.735 | 1.019  | 17                                          | 2.289  | -2.303 | -1.858 |
| 16                                                  | -3.868 | -2.875 | -1.606 | 8                                           | -2.822 | 0.245  | 1.415  |
| 16                                                  | 8.062  | 1.558  | -1.991 | 8                                           | -2.343 | 0.218  | -1.378 |
| 8                                                   | 0.239  | 1.336  | -0.126 | 8                                           | 3.683  | 0.480  | -0.985 |
| 8                                                   | -2.547 | 0.284  | -1.019 | 8                                           | -0.976 | -1.576 | -1.247 |
| 8                                                   | -3.195 | 0.184  | 1.149  | 8                                           | 4.084  | 2.420  | 0.093  |
| 8                                                   | 4.263  | -0.968 | -1.848 | 7                                           | 0.042  | 2.189  | 1.396  |
| 8                                                   | -3.127 | 2.473  | -0.613 | 7                                           | -6.086 | -1.334 | 1.077  |
| 8                                                   | 4.342  | -1.360 | 1.926  | 6                                           | 1.133  | 0.171  | -0.264 |
| 8                                                   | -5.127 | 2.676  | 0.429  | 6                                           | -0.356 | 0.429  | -0.127 |
| 7                                                   | -0.276 | -0.970 | -0.358 | 6                                           | 1.916  | 1.391  | 0.201  |
| 7                                                   | 2.932  | -0.369 | -0.110 | 6                                           | -0.834 | 1.342  | 0.749  |
| 7                                                   | 5.479  | -0.725 | 1.427  | 6                                           | 1.372  | 2.311  | 1.045  |
| 7                                                   | 7.571  | 0.657  | 0.391  | 6                                           | 1.554  | -1.084 | 0.489  |
| 7                                                   | -5.808 | -1.195 | -1.685 | 6                                           | -2.274 | 1.510  | 1.137  |
| 7                                                   | 9.619  | 1.810  | 0.241  | 6                                           | -1.229 | -0.440 | -0.927 |
| 6                                                   | 0.863  | -1.861 | -0.532 | 6                                           | 2.069  | 3.479  | 1.658  |
| 6                                                   | 1.727  | -0.604 | -0.833 | 6                                           | 3.315  | 1.525  | -0.203 |
| 6                                                   | 0.494  | 0.198  | -0.400 | 6                                           | 2.080  | -2.223 | -0.125 |
| 6                                                   | -1.452 | -1.259 | 0.329  | 6                                           | 1.412  | -1.119 | 1.878  |
| 6                                                   | -0.458 | -3.411 | 1.140  | 6                                           | 2.454  | -3.344 | 0.611  |
| 6                                                   | -1.592 | -2.426 | 1.007  | 6                                           | 1.776  | -2.227 | 2.630  |
| 6                                                   | -2.496 | -0.197 | 0.247  | 6                                           | 2.301  | -3.345 | 1.991  |
| 6                                                   | -2.826 | -2.845 | 1.663  | 6                                           | -4.226 | 0.202  | 1.268  |
| 6                                                   | 4.147  | -0.613 | -0.687 | 6                                           | -3.269 | -0.572 | -2.151 |
| 6                                                   | 5.349  | -0.357 | 0.193  | 6                                           | -4.670 | -1.237 | 1.413  |
| 6                                                   | -4.089 | -2.785 | 1.203  | 6                                           | 5.040  | 0.492  | -1.421 |
| 6                                                   | -3.530 | 1.285  | -1.248 | 6                                           | -4.287 | 0.369  | -2.737 |
| 6                                                   | -3.267 | 4.073  | 1.134  | 1                                           | 1.355  | -0.004 | -1.320 |
| 6                                                   | -4.551 | -2.337 | -0.100 | 1                                           | -0.343 | 2.870  | 2.033  |
| 6                                                   | 6.488  | 0.339  | -0.401 | 1                                           | -2.340 | 2.167  | 2.023  |
| 6                                                   | -3.977 | 3.020  | 0.303  | 1                                           | -2.829 | 2.011  | 0.331  |
| 6                                                   | -4.309 | 4.908  | 1.870  | 1                                           | 2.978  | 3.175  | 2.177  |
| 6                                                   | -2.386 | 3.315  | 2.142  | 1                                           | 2.389  | 4.193  | 0.897  |
| 6                                                   | -2.384 | 4.961  | 0.253  | 1                                           | 1.411  | 3.994  | 2.363  |
| 6                                                   | -5.578 | -1.454 | -0.355 | 1                                           | 0.997  | -0.245 | 2.374  |
| 6                                                   | 6.574  | 0.736  | -1.710 | 1                                           | 2.856  | -4.207 | 0.094  |
| 6                                                   | -6.364 | -0.722 | 0.675  | 1                                           | 1.649  | -2.219 | 3.707  |
| 6                                                   | 8.467  | 1.290  | -0.297 | 1                                           | 2.592  | -4.221 | 2.561  |
| 6                                                   | -4.993 | -1.869 | -2.443 | 1                                           | -4.501 | 0.587  | 0.271  |
| 6                                                   | 4.611  | -1.799 | 3.253  | 1                                           | -4.730 | 0.841  | 2.009  |
| 1                                                   | 0.729  | -2.577 | -1.348 | 1                                           | -3.720 | -1.319 | -1.488 |
| 1                                                   | 1.948  | -0.523 | -1.900 | 1                                           | -2.712 | -1.119 | -2.917 |
| 1                                                   | -0.568 | -4.220 | 0.406  | 1                                           | -4.534 | -1.558 | 2.450  |
| 1                                                   | -0.514 | -3.888 | 2.122  | 1                                           | -4.001 | -1.867 | 0.803  |
| 1                                                   | 2.892  | -0.272 | 0.896  | 1                                           | 5.245  | 1.377  | -2.029 |
| 1                                                   | -2.686 | -3.281 | 2.651  | 1                                           | 5.721  | 0.493  | -0.568 |

|                               |        |        |        |                               |        |        |        |
|-------------------------------|--------|--------|--------|-------------------------------|--------|--------|--------|
| 1                             | -4.878 | -3.082 | 1.892  | 1                             | 5.167  | -0.414 | -2.010 |
| 1                             | -4.501 | 0.963  | -0.874 | 1                             | -4.811 | 0.930  | -1.958 |
| 1                             | -3.551 | 1.435  | -2.326 | 1                             | -3.818 | 1.092  | -3.408 |
| 1                             | -3.810 | 5.645  | 2.504  | 1                             | -5.030 | -0.190 | -3.310 |
| 1                             | -4.957 | 5.445  | 1.173  | 1                             | -6.213 | -1.216 | 0.075  |
| 1                             | -4.946 | 4.286  | 2.500  | 1                             | -6.435 | -2.261 | 1.294  |
| 1                             | -1.878 | 4.037  | 2.788  | 8                             | -1.844 | 3.104  | -1.805 |
| 1                             | -1.627 | 2.715  | 1.635  | 1                             | -0.890 | 3.210  | -1.849 |
| 1                             | -2.983 | 2.652  | 2.773  | 1                             | -1.963 | 2.145  | -1.766 |
| 1                             | -1.911 | 5.728  | 0.873  |                               |        |        |        |
| 1                             | -2.968 | 5.472  | -0.518 |                               |        |        |        |
| 1                             | -1.598 | 4.385  | -0.237 |                               |        |        |        |
| 1                             | 5.878  | 0.556  | -2.512 |                               |        |        |        |
| 1                             | -6.270 | -1.186 | 1.658  |                               |        |        |        |
| 1                             | -6.006 | 0.309  | 0.775  |                               |        |        |        |
| 1                             | -7.420 | -0.680 | 0.398  |                               |        |        |        |
| 1                             | -5.001 | -1.829 | -3.525 |                               |        |        |        |
| 1                             | 5.421  | -2.533 | 3.260  |                               |        |        |        |
| 1                             | 4.876  | -0.956 | 3.896  |                               |        |        |        |
| 1                             | 3.686  | -2.260 | 3.598  |                               |        |        |        |
| 1                             | 9.837  | 1.412  | 1.144  |                               |        |        |        |
| 1                             | 10.419 | 1.854  | -0.373 |                               |        |        |        |
| 8                             | -6.706 | 1.690  | -1.995 |                               |        |        |        |
| 1                             | -6.596 | 0.729  | -1.958 |                               |        |        |        |
| 1                             | -6.432 | 1.998  | -1.122 |                               |        |        |        |
| Amlodipine                    |        |        |        | Amlodipine                    |        |        |        |
| motif 2, Eint = -6.7 kcal/mol |        |        |        | motif 3, Eint = -8.2 kcal/mol |        |        |        |
| 17                            | 2.666  | -2.602 | 0.079  | 17                            | 2.666  | -2.601 | 0.078  |
| 8                             | -3.196 | 1.268  | 0.342  | 8                             | -3.196 | 1.268  | 0.342  |
| 8                             | -2.304 | -1.083 | -1.167 | 8                             | -2.305 | -1.083 | -1.166 |
| 8                             | 3.752  | 0.334  | -0.547 | 8                             | 3.752  | 0.334  | -0.546 |
| 8                             | -0.281 | -2.041 | -1.331 | 8                             | -0.281 | -2.041 | -1.329 |
| 8                             | 3.905  | 2.582  | -0.444 | 8                             | 3.905  | 2.582  | -0.445 |
| 7                             | -0.346 | 2.564  | -0.317 | 7                             | -0.346 | 2.564  | -0.318 |
| 7                             | -6.661 | 0.467  | 1.163  | 7                             | -6.660 | 0.467  | 1.165  |
| 6                             | 1.092  | 0.149  | -0.305 | 6                             | 1.092  | 0.149  | -0.305 |
| 6                             | -0.376 | 0.230  | -0.688 | 6                             | -0.376 | 0.230  | -0.688 |
| 6                             | 1.760  | 1.508  | -0.370 | 6                             | 1.760  | 1.508  | -0.371 |
| 6                             | -1.043 | 1.410  | -0.621 | 6                             | -1.043 | 1.410  | -0.621 |
| 6                             | 1.034  | 2.654  | -0.312 | 6                             | 1.034  | 2.655  | -0.313 |
| 6                             | 1.240  | -0.469 | 1.080  | 6                             | 1.240  | -0.469 | 1.080  |
| 6                             | -2.509 | 1.640  | -0.831 | 6                             | -2.510 | 1.640  | -0.830 |
| 6                             | -0.956 | -1.054 | -1.091 | 6                             | -0.956 | -1.054 | -1.090 |
| 6                             | 1.565  | 4.049  | -0.269 | 6                             | 1.565  | 4.049  | -0.270 |
| 6                             | 3.217  | 1.580  | -0.454 | 6                             | 3.217  | 1.580  | -0.454 |
| 6                             | 1.916  | -1.662 | 1.350  | 6                             | 1.917  | -1.662 | 1.349  |
| 6                             | 0.662  | 0.188  | 2.172  | 6                             | 0.662  | 0.188  | 2.172  |
| 6                             | 2.022  | -2.169 | 2.643  | 6                             | 2.023  | -2.169 | 2.643  |
| 6                             | 0.753  | -0.301 | 3.466  | 6                             | 0.754  | -0.301 | 3.466  |
| 6                             | 1.441  | -1.487 | 3.702  | 6                             | 1.442  | -1.487 | 3.702  |
| 6                             | -4.593 | 1.200  | 0.142  | 6                             | -4.592 | 1.200  | 0.142  |
| 6                             | -2.861 | -2.351 | -1.569 | 6                             | -2.862 | -2.351 | -1.569 |
| 6                             | -5.224 | 0.599  | 1.377  | 6                             | -5.223 | 0.599  | 1.378  |
| 6                             | 5.174  | 0.289  | -0.621 | 6                             | 5.175  | 0.289  | -0.620 |
| 6                             | -4.359 | -2.217 | -1.541 | 6                             | -4.359 | -2.216 | -1.542 |
| 1                             | 1.585  | -0.511 | -1.017 | 1                             | 1.585  | -0.511 | -1.017 |
| 1                             | -0.866 | 3.428  | -0.317 | 1                             | -0.866 | 3.428  | -0.317 |
| 1                             | -2.687 | 2.707  | -1.056 | 1                             | -2.688 | 2.707  | -1.056 |
| 1                             | -2.872 | 1.064  | -1.690 | 1                             | -2.873 | 1.064  | -1.689 |
| 1                             | 2.259  | 4.185  | 0.560  | 1                             | 2.260  | 4.185  | 0.558  |
| 1                             | 2.132  | 4.281  | -1.171 | 1                             | 2.131  | 4.282  | -1.173 |
| 1                             | 0.749  | 4.770  | -0.172 | 1                             | 0.749  | 4.771  | -0.172 |
| 1                             | 0.119  | 1.112  | 1.985  | 1                             | 0.120  | 1.112  | 1.985  |
| 1                             | 2.557  | -3.097 | 2.806  | 1                             | 2.558  | -3.097 | 2.805  |
| 1                             | 0.291  | 0.238  | 4.286  | 1                             | 0.292  | 0.238  | 4.286  |
| 1                             | 1.525  | -1.887 | 4.708  | 1                             | 1.527  | -1.887 | 4.707  |
| 1                             | -4.809 | 0.572  | -0.740 | 1                             | -4.809 | 0.572  | -0.739 |
| 1                             | -5.016 | 2.197  | -0.061 | 1                             | -5.016 | 2.197  | -0.060 |
| 1                             | -2.499 | -3.125 | -0.886 | 1                             | -2.500 | -3.124 | -0.884 |
| 1                             | -2.484 | -2.603 | -2.565 | 1                             | -2.483 | -2.604 | -2.564 |
| 1                             | -5.058 | 1.269  | 2.226  | 1                             | -5.057 | 1.268  | 2.227  |
| 1                             | -4.699 | -0.341 | 1.612  | 1                             | -4.698 | -0.342 | 1.612  |
| 1                             | 5.534  | 0.810  | -1.511 | 1                             | 5.534  | 0.809  | -1.511 |
| 1                             | 5.623  | 0.755  | 0.259  | 1                             | 5.623  | 0.756  | 0.260  |
| 1                             | 5.434  | -0.767 | -0.665 | 1                             | 5.434  | -0.767 | -0.663 |
| 1                             | -4.711 | -1.969 | -0.536 | 1                             | -4.713 | -1.967 | -0.538 |
| 1                             | -4.703 | -1.441 | -2.229 | 1                             | -4.702 | -1.440 | -2.231 |
| 1                             | -4.824 | -3.159 | -1.839 | 1                             | -4.824 | -3.158 | -1.840 |
| 1                             | -6.846 | -0.280 | 0.500  | 1                             | -6.846 | -0.280 | 0.501  |
| 1                             | -7.118 | 0.193  | 2.025  | 1                             | -7.118 | 0.193  | 2.027  |
| 8                             | 2.031  | -1.633 | -3.134 | 8                             | 2.027  | -1.634 | -3.135 |
| 1                             | 1.333  | -1.962 | -2.550 | 1                             | 2.785  | -1.559 | -2.548 |
| 1                             | 2.787  | -1.558 | -2.546 | 1                             | 1.331  | -1.963 | -2.549 |
| Amlodipine                    |        |        |        | Amlodipine                    |        |        |        |

|                                |        |        |        |                               |        |        |        |
|--------------------------------|--------|--------|--------|-------------------------------|--------|--------|--------|
| motif 4, Eint = -10.7 kcal/mol |        |        |        | motif 5, Eint = -8.6 kcal/mol |        |        |        |
| 17                             | 3.218  | -2.502 | -0.608 | 17                            | 2.719  | -2.497 | -0.569 |
| 8                              | -3.143 | 0.936  | 0.206  | 8                             | -3.027 | 1.552  | 0.368  |
| 8                              | -2.003 | -1.559 | -1.156 | 8                             | -2.251 | -0.843 | -1.202 |
| 8                              | 3.915  | 0.565  | -0.623 | 8                             | 3.867  | 0.471  | -0.561 |
| 8                              | 0.100  | -2.285 | -1.499 | 8                             | -0.246 | -1.780 | -1.600 |
| 8                              | 3.793  | 2.804  | -0.384 | 8                             | 4.045  | 2.703  | -0.297 |
| 7                              | -0.423 | 2.297  | -0.463 | 7                             | -0.204 | 2.752  | -0.327 |
| 7                              | -6.515 | -0.158 | 1.095  | 7                             | -6.460 | 0.817  | 1.368  |
| 6                              | 1.299  | 0.042  | -0.590 | 6                             | 1.204  | 0.307  | -0.539 |
| 6                              | -0.192 | -0.025 | -0.888 | 6                             | -0.278 | 0.448  | -0.855 |
| 6                              | 1.792  | 1.478  | -0.498 | 6                             | 1.885  | 1.659  | -0.422 |
| 6                              | -0.978 | 1.077  | -0.785 | 6                             | -0.922 | 1.631  | -0.692 |
| 6                              | 0.931  | 2.523  | -0.363 | 6                             | 1.174  | 2.808  | -0.271 |
| 6                              | 1.595  | -0.714 | 0.702  | 6                             | 1.361  | -0.501 | 0.746  |
| 6                              | -2.456 | 1.157  | -1.026 | 6                             | -2.391 | 1.889  | -0.843 |
| 6                              | -0.655 | -1.376 | -1.224 | 6                             | -0.906 | -0.812 | -1.260 |
| 6                              | 1.294  | 3.955  | -0.141 | 6                             | 1.727  | 4.179  | -0.062 |
| 6                              | 3.231  | 1.730  | -0.490 | 6                             | 3.346  | 1.714  | -0.415 |
| 6                              | 2.421  | -1.838 | 0.795  | 6                             | 2.002  | -1.740 | 0.835  |
| 6                              | 0.998  | -0.265 | 1.884  | 6                             | 0.809  | 0.012  | 1.925  |
| 6                              | 2.643  | -2.479 | 2.012  | 6                             | 2.095  | -2.430 | 2.040  |
| 6                              | 1.208  | -0.891 | 3.105  | 6                             | 0.891  | -0.661 | 3.135  |
| 6                              | 2.038  | -2.005 | 3.167  | 6                             | 1.540  | -1.890 | 3.192  |
| 6                              | -4.520 | 0.658  | 0.000  | 6                             | -4.433 | 1.501  | 0.236  |
| 6                              | -2.439 | -2.903 | -1.429 | 6                             | -2.850 | -2.120 | -1.528 |
| 6                              | -5.120 | 0.206  | 1.312  | 6                             | -5.013 | 0.939  | 1.514  |
| 6                              | 5.334  | 0.686  | -0.612 | 6                             | 5.289  | 0.400  | -0.554 |
| 6                              | -3.931 | -2.942 | -1.241 | 6                             | -4.339 | -1.963 | -1.403 |
| 1                              | 1.830  | -0.477 | -1.394 | 1                             | 1.674  | -0.266 | -1.341 |
| 1                              | -1.061 | 3.059  | -0.247 | 1                             | -0.711 | 3.620  | -0.240 |
| 1                              | -2.713 | 2.155  | -1.414 | 1                             | -2.555 | 2.957  | -1.079 |
| 1                              | -2.772 | 0.414  | -1.760 | 1                             | -2.805 | 1.307  | -1.673 |
| 1                              | 1.968  | 4.067  | 0.708  | 1                             | 2.387  | 4.214  | 0.805  |
| 1                              | 1.831  | 4.362  | -1.000 | 1                             | 2.338  | 4.491  | -0.910 |
| 1                              | 0.396  | 4.555  | 0.027  | 1                             | 0.920  | 4.903  | 0.076  |
| 1                              | 0.348  | 0.606  | 1.828  | 1                             | 0.293  | 0.968  | 1.874  |
| 1                              | 3.291  | -3.348 | 2.039  | 1                             | 2.603  | -3.388 | 2.064  |
| 1                              | 0.728  | -0.512 | 4.001  | 1                             | 0.449  | -0.232 | 4.027  |
| 1                              | 2.216  | -2.509 | 4.111  | 1                             | 1.614  | -2.433 | 4.128  |
| 1                              | -4.617 | -0.137 | -0.756 | 1                             | -4.699 | 0.855  | -0.619 |
| 1                              | -5.047 | 1.544  | -0.387 | 1                             | -4.851 | 2.499  | 0.028  |
| 1                              | -1.917 | -3.585 | -0.750 | 1                             | -2.454 | -2.875 | -0.843 |
| 1                              | -2.140 | -3.178 | -2.445 | 1                             | -2.543 | -2.405 | -2.539 |
| 1                              | -5.086 | 1.033  | 2.030  | 1                             | -4.803 | 1.629  | 2.337  |
| 1                              | -4.486 | -0.595 | 1.725  | 1                             | -4.488 | 0.000  | 1.750  |
| 1                              | 5.678  | 1.310  | -1.440 | 1                             | 5.711  | 0.974  | -1.382 |
| 1                              | 5.678  | 1.131  | 0.324  | 1                             | 5.692  | 0.794  | 0.381  |
| 1                              | 5.716  | -0.328 | -0.715 | 1                             | 5.531  | -0.656 | -0.659 |
| 1                              | -4.205 | -2.648 | -0.224 | 1                             | -4.618 | -1.677 | -0.385 |
| 1                              | -4.439 | -2.273 | -1.942 | 1                             | -4.722 | -1.206 | -2.092 |
| 1                              | -4.306 | -3.953 | -1.413 | 1                             | -4.833 | -2.909 | -1.633 |
| 1                              | -6.567 | -1.025 | 0.567  | 1                             | -6.681 | 0.053  | 0.736  |
| 1                              | -6.970 | -0.345 | 1.981  | 1                             | -6.880 | 0.570  | 2.257  |
| 8                              | -2.738 | 3.654  | 0.696  | 8                             | -0.444 | -4.393 | -0.492 |
| 1                              | -2.854 | 4.135  | 1.518  | 1                             | 0.406  | -4.636 | -0.121 |
| 1                              | -2.992 | 2.736  | 0.890  | 1                             | -0.257 | -3.569 | -0.965 |
| Amlodipine                     |        |        |        | Amlodipine                    |        |        |        |
| motif 6, Eint = -8.2 kcal/mol  |        |        |        | motif 7, Eint = -7.1 kcal/mol |        |        |        |
| 17                             | 3.427  | -2.385 | -0.459 | 17                            | 2.102  | -3.017 | -0.736 |
| 8                              | -2.893 | 0.675  | 0.261  | 8                             | -3.221 | 1.415  | 0.532  |
| 8                              | -1.777 | -1.414 | -1.444 | 8                             | -2.696 | -0.666 | -1.445 |
| 8                              | 4.107  | 0.680  | -0.597 | 8                             | 3.532  | -0.219 | -0.635 |
| 8                              | 0.334  | -2.191 | -1.443 | 8                             | -0.858 | -1.957 | -1.564 |
| 8                              | 3.968  | 2.921  | -0.399 | 8                             | 3.964  | 1.952  | -0.206 |
| 7                              | -0.242 | 2.371  | -0.375 | 7                             | -0.236 | 2.469  | -0.048 |
| 7                              | -6.256 | -0.455 | 1.136  | 7                             | -6.743 | 0.980  | 1.385  |
| 6                              | 1.486  | 0.141  | -0.534 | 6                             | 0.863  | -0.093 | -0.496 |
| 6                              | 0.004  | 0.070  | -0.868 | 6                             | -0.594 | 0.246  | -0.773 |
| 6                              | 1.977  | 1.578  | -0.468 | 6                             | 1.705  | 1.160  | -0.317 |
| 6                              | -0.797 | 1.156  | -0.728 | 6                             | -1.090 | 1.477  | -0.493 |
| 6                              | 1.115  | 2.620  | -0.335 | 6                             | 1.138  | 2.366  | -0.045 |
| 6                              | 1.756  | -0.587 | 0.779  | 6                             | 0.960  | -0.994 | 0.731  |
| 6                              | -2.287 | 1.219  | -0.890 | 6                             | -2.519 | 1.926  | -0.577 |
| 6                              | -0.437 | -1.269 | -1.274 | 6                             | -1.367 | -0.890 | -1.292 |
| 6                              | 1.471  | 4.060  | -0.161 | 6                             | 1.849  | 3.646  | 0.251  |
| 6                              | 3.416  | 1.840  | -0.480 | 6                             | 3.159  | 1.045  | -0.372 |
| 6                              | 2.593  | -1.700 | 0.912  | 6                             | 1.491  | -2.288 | 0.726  |
| 6                              | 1.125  | -0.125 | 1.938  | 6                             | 0.483  | -0.507 | 1.953  |
| 6                              | 2.795  | -2.314 | 2.146  | 6                             | 1.551  | -3.054 | 1.888  |
| 6                              | 1.315  | -0.725 | 3.174  | 6                             | 0.534  | -1.257 | 3.119  |
| 6                              | 2.157  | -1.826 | 3.277  | 6                             | 1.074  | -2.539 | 3.085  |
| 6                              | -4.285 | 0.515  | 0.089  | 6                             | -4.616 | 1.599  | 0.407  |
| 6                              | -2.193 | -2.737 | -1.824 | 6                             | -3.438 | -1.793 | -1.947 |

|                               |        |        |        |                                |        |        |        |
|-------------------------------|--------|--------|--------|--------------------------------|--------|--------|--------|
| 6                             | -4.826 | -0.182 | 1.318  | 6                              | -5.298 | 0.836  | 1.521  |
| 6                             | 5.525  | 0.811  | -0.600 | 6                              | 4.939  | -0.464 | -0.700 |
| 6                             | -3.697 | -2.753 | -1.841 | 6                              | -4.894 | -1.413 | -1.954 |
| 1                             | 2.036  | -0.392 | -1.315 | 1                              | 1.244  | -0.666 | -1.345 |
| 1                             | -0.865 | 3.160  | -0.296 | 1                              | -0.637 | 3.376  | 0.136  |
| 1                             | -2.599 | 2.270  | -1.022 | 1                              | -2.556 | 3.031  | -0.577 |
| 1                             | -2.604 | 0.672  | -1.786 | 1                              | -2.978 | 1.588  | -1.513 |
| 1                             | 2.141  | 4.205  | 0.686  | 1                              | 2.536  | 3.534  | 1.090  |
| 1                             | 2.008  | 4.442  | -1.031 | 1                              | 2.461  | 3.962  | -0.595 |
| 1                             | 0.571  | 4.664  | -0.012 | 1                              | 1.134  | 4.439  | 0.482  |
| 1                             | 0.461  | 0.732  | 1.852  | 1                              | 0.054  | 0.492  | 1.975  |
| 1                             | 3.451  | -3.175 | 2.205  | 1                              | 1.970  | -4.052 | 1.839  |
| 1                             | 0.807  | -0.337 | 4.051  | 1                              | 0.154  | -0.846 | 4.048  |
| 1                             | 2.319  | -2.310 | 4.235  | 1                              | 1.124  | -3.141 | 3.985  |
| 1                             | -4.477 | -0.096 | -0.811 | 1                              | -4.952 | 1.223  | -0.575 |
| 1                             | -4.785 | 1.484  | -0.059 | 1                              | -4.883 | 2.667  | 0.452  |
| 1                             | -1.777 | -3.456 | -1.112 | 1                              | -3.236 | -2.659 | -1.310 |
| 1                             | -1.764 | -2.977 | -2.803 | 1                              | -3.069 | -2.043 | -2.947 |
| 1                             | -4.712 | 0.475  | 2.185  | 1                              | -4.994 | 1.260  | 2.483  |
| 1                             | -4.221 | -1.080 | 1.510  | 1                              | -4.929 | -0.202 | 1.506  |
| 1                             | 5.858  | 1.419  | -1.444 | 1                              | 5.401  | 0.120  | -1.498 |
| 1                             | 5.873  | 1.279  | 0.323  | 1                              | 5.422  | -0.205 | 0.244  |
| 1                             | 5.912  | -0.203 | -0.683 | 1                              | 5.038  | -1.529 | -0.899 |
| 1                             | -4.102 | -2.536 | -0.849 | 1                              | -5.249 | -1.202 | -0.942 |
| 1                             | -4.095 | -2.016 | -2.543 | 1                              | -5.072 | -0.530 | -2.572 |
| 1                             | -4.059 | -3.737 | -2.146 | 1                              | -5.493 | -2.232 | -2.357 |
| 1                             | -6.383 | -1.131 | 0.387  | 1                              | -7.073 | 0.443  | 0.588  |
| 1                             | -6.628 | -0.896 | 1.970  | 1                              | -7.210 | 0.589  | 2.195  |
| 8                             | -6.942 | 2.328  | 0.816  | 8                              | 6.826  | 2.053  | -0.270 |
| 1                             | -7.869 | 2.567  | 0.770  | 1                              | 7.103  | 2.952  | -0.086 |
| 1                             | -6.935 | 1.354  | 0.895  | 1                              | 5.857  | 2.088  | -0.231 |
| Balsalazide                   |        |        |        | Balsalazide                    |        |        |        |
| motif 1, Eint = -9.4 kcal/mol |        |        |        | motif 2, Eint = -7.5 kcal/mol  |        |        |        |
| 8                             | -4.637 | -1.862 | -0.656 | 8                              | 4.842  | 1.517  | -0.938 |
| 8                             | 7.825  | -0.710 | 0.780  | 8                              | -7.640 | 0.735  | 0.866  |
| 8                             | -6.860 | 2.407  | 2.030  | 8                              | 6.986  | -2.062 | 2.252  |
| 8                             | -5.253 | 2.800  | 0.513  | 8                              | 5.439  | -2.834 | 0.820  |
| 8                             | 6.096  | 2.652  | -1.025 | 8                              | -6.045 | -2.678 | -0.967 |
| 8                             | 8.022  | 1.727  | -0.335 | 8                              | -7.930 | -1.696 | -0.243 |
| 7                             | -4.528 | 0.395  | -0.909 | 7                              | 4.628  | -0.729 | -1.021 |
| 7                             | 1.631  | -1.234 | 0.224  | 7                              | -1.452 | 1.098  | 0.153  |
| 7                             | 2.372  | -0.271 | -0.125 | 7                              | -2.224 | 0.150  | -0.172 |
| 6                             | -5.959 | 0.585  | -1.061 | 6                              | 6.058  | -0.931 | -1.146 |
| 6                             | -2.498 | -0.853 | -0.474 | 6                              | 2.650  | 0.616  | -0.625 |
| 6                             | -6.663 | 0.859  | 0.258  | 6                              | 6.772  | -0.922 | 0.197  |
| 6                             | -3.975 | -0.823 | -0.681 | 6                              | 4.117  | 0.525  | -0.866 |
| 6                             | -1.947 | -2.005 | 0.091  | 6                              | 2.140  | 1.793  | -0.070 |
| 6                             | -1.646 | 0.203  | -0.833 | 6                              | 1.768  | -0.428 | -0.948 |
| 6                             | 0.260  | -1.036 | -0.041 | 6                              | -0.093 | 0.865  | -0.140 |
| 6                             | -0.583 | -2.094 | 0.313  | 6                              | 0.781  | 1.910  | 0.177  |
| 6                             | -0.283 | 0.118  | -0.623 | 6                              | 0.412  | -0.311 | -0.714 |
| 6                             | 3.737  | -0.460 | 0.139  | 6                              | -3.577 | 0.376  | 0.124  |
| 6                             | 5.962  | 0.526  | -0.039 | 6                              | -5.831 | -0.552 | 0.003  |
| 6                             | 4.581  | 0.580  | -0.241 | 6                              | -4.458 | -0.643 | -0.232 |
| 6                             | 6.500  | -0.626 | 0.571  | 6                              | -6.323 | 0.616  | 0.623  |
| 6                             | 4.288  | -1.601 | 0.746  | 6                              | -4.083 | 1.532  | 0.740  |
| 6                             | -6.167 | 2.113  | 0.911  | 6                              | 6.310  | -2.038 | 1.087  |
| 6                             | 5.646  | -1.674 | 0.954  | 6                              | -5.433 | 1.641  | 0.982  |
| 6                             | 6.825  | 1.651  | -0.457 | 6                              | -6.734 | -1.654 | -0.390 |
| 1                             | -6.112 | 1.419  | -1.751 | 1                              | 6.221  | -1.882 | -1.657 |
| 1                             | -6.377 | -0.312 | -1.518 | 1                              | 6.453  | -0.132 | -1.775 |
| 1                             | -6.537 | 0.020  | 0.949  | 1                              | 6.607  | 0.030  | 0.713  |
| 1                             | -7.745 | 0.931  | 0.113  | 1                              | 7.856  | -1.002 | 0.072  |
| 1                             | -3.996 | 1.227  | -0.694 | 1                              | 4.094  | -1.522 | -0.696 |
| 1                             | -2.615 | -2.819 | 0.349  | 1                              | 2.811  | 2.612  | 0.167  |
| 1                             | -2.047 | 1.092  | -1.312 | 1                              | 2.143  | -1.331 | -1.420 |
| 1                             | -0.140 | -2.978 | 0.758  | 1                              | 0.369  | 2.812  | 0.617  |
| 1                             | 0.382  | 0.925  | -0.906 | 1                              | -0.276 | -1.107 | -0.970 |
| 1                             | 4.145  | 1.454  | -0.708 | 1                              | -4.056 | -1.530 | -0.706 |
| 1                             | 3.630  | -2.410 | 1.041  | 1                              | -3.396 | 2.323  | 1.016  |
| 1                             | 6.083  | -2.553 | 1.423  | 1                              | -5.834 | 2.532  | 1.459  |
| 1                             | 8.016  | -1.555 | 1.201  | 1                              | -7.798 | 1.586  | 1.289  |
| 1                             | -6.471 | 3.216  | 2.393  | 1                              | 6.626  | -2.794 | 2.772  |
| 1                             | 6.736  | 3.336  | -1.263 | 1                              | -6.710 | -3.344 | -1.188 |
| 8                             | -7.395 | -2.116 | -0.189 | 8                              | 4.570  | 4.103  | 0.153  |
| 1                             | -6.440 | -2.173 | -0.369 | 1                              | 4.842  | 4.794  | -0.453 |
| 1                             | -7.694 | -3.027 | -0.172 | 1                              | 4.760  | 3.276  | -0.320 |
| Balsalazide                   |        |        |        | Balsalazide                    |        |        |        |
| motif 3, Eint = -7.6 kcal/mol |        |        |        | motif 4, Eint = -10.9 kcal/mol |        |        |        |
| 8                             | -5.512 | -1.989 | -0.774 | 8                              | -4.718 | -2.267 | -0.141 |
| 8                             | 6.925  | -0.658 | 0.770  | 8                              | 7.771  | -0.625 | 0.410  |
| 8                             | -7.818 | 1.602  | 2.224  | 8                              | -7.220 | 1.286  | 2.202  |
| 8                             | -6.350 | 2.410  | 0.729  | 8                              | -6.085 | 2.275  | 0.550  |
| 8                             | 5.186  | 2.720  | -0.911 | 8                              | 5.727  | 2.971  | -0.259 |

|                                |        |        |        |                               |        |        |        |
|--------------------------------|--------|--------|--------|-------------------------------|--------|--------|--------|
| 8                              | 7.123  | 1.737  | -0.372 | 8                             | 7.747  | 2.036  | 0.039  |
| 7                              | -5.429 | 0.263  | -1.032 | 7                             | -4.689 | -0.143 | -0.913 |
| 7                              | 0.752  | -1.276 | 0.143  | 7                             | 1.594  | -1.439 | 0.038  |
| 7                              | 1.480  | -0.294 | -0.179 | 7                             | 2.249  | -0.362 | -0.064 |
| 6                              | -6.870 | 0.375  | -1.137 | 6                             | -6.128 | -0.106 | -1.058 |
| 6                              | -3.377 | -0.958 | -0.577 | 6                             | -2.586 | -1.220 | -0.339 |
| 6                              | -7.563 | 0.388  | 0.216  | 6                             | -6.852 | -0.010 | 0.275  |
| 6                              | -4.855 | -0.956 | -0.793 | 6                             | -4.076 | -1.266 | -0.450 |
| 6                              | -2.810 | -2.107 | -0.022 | 6                             | -1.928 | -2.428 | -0.100 |
| 6                              | -2.543 | 0.117  | -0.918 | 6                             | -1.835 | -0.039 | -0.444 |
| 6                              | -0.620 | -1.097 | -0.128 | 6                             | 0.199  | -1.287 | -0.096 |
| 6                              | -1.447 | -2.175 | 0.207  | 6                             | -0.549 | -2.464 | 0.015  |
| 6                              | -1.179 | 0.054  | -0.700 | 6                             | -0.457 | -0.069 | -0.323 |
| 6                              | 2.846  | -0.470 | 0.092  | 6                             | 3.639  | -0.514 | 0.068  |
| 6                              | 5.057  | 0.548  | -0.039 | 6                             | 5.785  | 0.648  | 0.075  |
| 6                              | 3.677  | 0.592  | -0.252 | 6                             | 4.393  | 0.651  | -0.036 |
| 6                              | 5.605  | -0.613 | 0.548  | 6                             | 6.431  | -0.586 | 0.299  |
| 6                              | 3.410  | -1.620 | 0.671  | 6                             | 4.298  | -1.735 | 0.292  |
| 6                              | -7.160 | 1.570  | 1.046  | 6                             | -6.655 | 1.295  | 0.981  |
| 6                              | 4.766  | -1.684 | 0.893  | 6                             | 5.669  | -1.760 | 0.404  |
| 6                              | 5.914  | 1.680  | -0.434 | 6                             | 6.550  | 1.907  | -0.041 |
| 1                              | -7.099 | 1.288  | -1.691 | 1                             | -6.375 | 0.749  | -1.693 |
| 1                              | -7.227 | -0.477 | -1.719 | 1                             | -6.460 | -1.015 | -1.567 |
| 1                              | -7.330 | -0.528 | 0.771  | 1                             | -6.535 | -0.824 | 0.934  |
| 1                              | -8.652 | 0.394  | 0.107  | 1                             | -7.931 | -0.150 | 0.145  |
| 1                              | -4.940 | 1.102  | -0.755 | 1                             | -4.165 | 0.674  | -1.204 |
| 1                              | -3.467 | -2.936 | 0.220  | 1                             | -2.528 | -3.327 | -0.008 |
| 1                              | -2.958 | 1.004  | -1.388 | 1                             | -2.322 | 0.918  | -0.606 |
| 1                              | -0.990 | -3.057 | 0.643  | 1                             | -0.020 | -3.395 | 0.195  |
| 1                              | -0.527 | 0.876  | -0.969 | 1                             | 0.132  | 0.837  | -0.398 |
| 1                              | 3.232  | 1.472  | -0.700 | 1                             | 3.875  | 1.587  | -0.208 |
| 1                              | 2.758  | -2.445 | 0.935  | 1                             | 3.709  | -2.641 | 0.373  |
| 1                              | 5.210  | -2.568 | 1.344  | 1                             | 6.187  | -2.701 | 0.577  |
| 1                              | 7.181  | -1.510 | 1.139  | 1                             | 8.038  | -1.539 | 0.559  |
| 1                              | -7.500 | 2.381  | 2.701  | 1                             | -7.061 | 2.157  | 2.593  |
| 1                              | 5.826  | 3.403  | -1.151 | 1                             | 6.310  | 3.739  | -0.320 |
| 8                              | 9.557  | 0.123  | 0.309  | 8                             | -3.931 | 2.618  | -1.232 |
| 1                              | 10.176 | 0.788  | 0.002  | 1                             | -3.937 | 3.372  | -1.824 |
| 1                              | 8.689  | 0.522  | 0.156  | 1                             | -4.698 | 2.729  | -0.649 |
| Balsalazide                    |        |        |        | Balsalazide                   |        |        |        |
| motif 5, Eint = -11.5 kcal/mol |        |        |        | motif 6, Eint = -3.9 kcal/mol |        |        |        |
| 8                              | -4.523 | -2.660 | -0.398 | 8                             | -5.185 | -1.872 | -1.086 |
| 8                              | 7.757  | -0.175 | 1.011  | 8                             | 7.253  | -1.036 | 0.806  |
| 8                              | -7.138 | 1.522  | 1.437  | 8                             | -7.498 | 1.208  | 2.460  |
| 8                              | -5.636 | 1.937  | -0.185 | 8                             | -5.986 | 2.224  | 1.147  |
| 8                              | 5.870  | 2.512  | -1.590 | 8                             | 5.567  | 2.593  | -0.300 |
| 8                              | 7.829  | 1.926  | -0.662 | 8                             | 7.351  | 1.680  | 0.719  |
| 7                              | -4.558 | -0.552 | -1.237 | 7                             | -5.069 | 0.388  | -0.934 |
| 7                              | 1.649  | -1.319 | 0.441  | 7                             | 1.063  | -1.441 | 0.065  |
| 7                              | 2.331  | -0.411 | -0.115 | 7                             | 1.804  | -0.419 | -0.014 |
| 6                              | -5.998 | -0.557 | -1.399 | 6                             | -6.506 | 0.543  | -1.044 |
| 6                              | -2.460 | -1.475 | -0.432 | 6                             | -3.042 | -0.927 | -0.669 |
| 6                              | -6.739 | -0.200 | -0.120 | 6                             | -7.224 | 0.343  | 0.281  |
| 6                              | -3.927 | -1.627 | -0.674 | 6                             | -4.516 | -0.862 | -0.908 |
| 6                              | -1.852 | -2.393 | 0.427  | 6                             | -2.502 | -2.170 | -0.332 |
| 6                              | -1.674 | -0.481 | -1.034 | 6                             | -2.188 | 0.180  | -0.782 |
| 6                              | 0.282  | -1.310 | 0.100  | 6                             | -0.299 | -1.193 | -0.196 |
| 6                              | -0.496 | -2.308 | 0.696  | 6                             | -1.145 | -2.302 | -0.093 |
| 6                              | -0.319 | -0.395 | -0.776 | 6                             | -0.831 | 0.056  | -0.550 |
| 6                              | 3.694  | -0.419 | 0.222  | 6                             | 3.164  | -0.665 | 0.228  |
| 6                              | 5.847  | 0.674  | -0.131 | 6                             | 5.375  | 0.354  | 0.379  |
| 6                              | 4.477  | 0.566  | -0.375 | 6                             | 3.996  | 0.451  | 0.188  |
| 6                              | 6.440  | -0.252 | 0.753  | 6                             | 5.926  | -0.918 | 0.634  |
| 6                              | 4.300  | -1.334 | 1.098  | 6                             | 3.728  | -1.927 | 0.478  |
| 6                              | -6.438 | 1.191  | 0.357  | 6                             | -6.818 | 1.361  | 1.305  |
| 6                              | 5.649  | -1.245 | 1.354  | 6                             | 5.086  | -2.042 | 0.679  |
| 6                              | 6.645  | 1.732  | -0.786 | 6                             | 6.226  | 1.559  | 0.311  |
| 1                              | -6.251 | 0.147  | -2.195 | 1                             | -6.709 | 1.540  | -1.441 |
| 1                              | -6.290 | -1.557 | -1.721 | 1                             | -6.864 | -0.192 | -1.766 |
| 1                              | -6.484 | -0.904 | 0.678  | 1                             | -7.019 | -0.657 | 0.679  |
| 1                              | -7.823 | -0.290 | -0.251 | 1                             | -8.311 | 0.390  | 0.157  |
| 1                              | -4.124 | 0.358  | -1.182 | 1                             | -4.572 | 1.159  | -0.513 |
| 1                              | -2.470 | -3.167 | 0.869  | 1                             | -3.174 | -3.019 | -0.267 |
| 1                              | -2.120 | 0.215  | -1.738 | 1                             | -2.581 | 1.146  | -1.084 |
| 1                              | -0.009 | -3.009 | 1.366  | 1                             | -0.709 | -3.259 | 0.176  |
| 1                              | 0.298  | 0.363  | -1.245 | 1                             | -0.164 | 0.905  | -0.643 |
| 1                              | 3.999  | 1.265  | -1.050 | 1                             | 3.541  | 1.420  | 0.018  |
| 1                              | 3.690  | -2.101 | 1.561  | 1                             | 3.080  | -2.796 | 0.506  |
| 1                              | 6.127  | -1.949 | 2.031  | 1                             | 5.531  | -3.016 | 0.868  |
| 1                              | 7.990  | -0.878 | 1.627  | 1                             | 7.468  | -1.966 | 0.937  |
| 1                              | -6.890 | 2.442  | 1.697  | 1                             | -7.176 | 1.889  | 3.067  |
| 1                              | 6.470  | 3.166  | -1.972 | 1                             | 6.175  | 3.345  | -0.281 |
| 8                              | -6.108 | 4.033  | 1.548  | 8                             | 3.393  | 2.488  | -2.435 |
| 1                              | -5.605 | 3.662  | 0.804  | 1                             | 3.005  | 1.615  | -2.342 |

|                                |        |        |        |                                |        |        |        |
|--------------------------------|--------|--------|--------|--------------------------------|--------|--------|--------|
| 1                              | -5.461 | 4.432  | 2.135  | 1                              | 4.145  | 2.476  | -1.832 |
| Balsalazide                    |        |        |        | Balsalazide                    |        |        |        |
| motif 7, Eint = -11.7 kcal/mol |        |        |        | motif 8, Eint = -6.9 kcal/mol  |        |        |        |
| 8                              | -5.517 | -1.775 | -0.995 | 8                              | 5.049  | 1.684  | -1.227 |
| 8                              | 6.952  | -1.413 | 0.851  | 8                              | -7.401 | 0.383  | 0.532  |
| 8                              | -7.632 | 1.679  | 2.310  | 8                              | 7.416  | -1.271 | 2.391  |
| 8                              | -6.091 | 2.518  | 0.907  | 8                              | 5.926  | -2.342 | 1.097  |
| 8                              | 5.438  | 2.229  | -0.552 | 8                              | -5.424 | -3.167 | -0.488 |
| 8                              | 7.286  | 1.135  | 0.120  | 8                              | -7.417 | -2.250 | -0.006 |
| 7                              | -5.286 | 0.481  | -1.029 | 7                              | 4.981  | -0.574 | -1.027 |
| 7                              | 0.762  | -1.562 | 0.074  | 7                              | -1.196 | 1.124  | -0.069 |
| 7                              | 1.554  | -0.598 | -0.128 | 7                              | -1.928 | 0.114  | -0.280 |
| 6                              | -6.714 | 0.697  | -1.140 | 6                              | 6.421  | -0.699 | -1.129 |
| 6                              | -3.324 | -0.909 | -0.671 | 6                              | 2.925  | 0.703  | -0.793 |
| 6                              | -7.426 | 0.635  | 0.203  | 6                              | 7.129  | -0.455 | 0.195  |
| 6                              | -4.794 | -0.790 | -0.905 | 6                              | 4.400  | 0.665  | -1.028 |
| 6                              | -2.841 | -2.144 | -0.232 | 6                              | 2.355  | 1.939  | -0.485 |
| 6                              | -2.418 | 0.140  | -0.885 | 6                              | 2.097  | -0.426 | -0.880 |
| 6                              | -0.590 | -1.270 | -0.199 | 6                              | 0.176  | 0.916  | -0.329 |
| 6                              | -1.489 | -2.322 | 0.008  | 6                              | 0.996  | 2.048  | -0.246 |
| 6                              | -1.066 | -0.032 | -0.654 | 6                              | 0.737  | -0.327 | -0.655 |
| 6                              | 2.901  | -0.884 | 0.144  | 6                              | -3.297 | 0.285  | -0.049 |
| 6                              | 5.171  | 0.014  | 0.158  | 6                              | -5.448 | -0.872 | 0.003  |
| 6                              | 3.801  | 0.156  | -0.071 | 6                              | -4.068 | -0.869 | -0.191 |
| 6                              | 5.639  | -1.234 | 0.621  | 6                              | -6.072 | 0.347  | 0.343  |
| 6                              | 3.383  | -2.120 | 0.606  | 6                              | -3.935 | 1.494  | 0.285  |
| 6                              | -6.960 | 1.709  | 1.140  | 6                              | 6.741  | -1.460 | 1.238  |
| 6                              | 4.730  | -2.282 | 0.837  | 6                              | -5.298 | 1.511  | 0.474  |
| 6                              | 6.085  | 1.153  | -0.081 | 6                              | -6.227 | -2.120 | -0.150 |
| 1                              | -6.874 | 1.670  | -1.611 | 1                              | 6.648  | -1.700 | -1.504 |
| 1                              | -7.116 | -0.073 | -1.799 | 1                              | 6.765  | 0.029  | -1.865 |
| 1                              | -7.263 | -0.339 | 0.675  | 1                              | 6.899  | 0.548  | 0.570  |
| 1                              | -8.511 | 0.724  | 0.084  | 1                              | 8.217  | -0.479 | 0.076  |
| 1                              | -4.748 | 1.255  | -0.669 | 1                              | 4.500  | -1.344 | -0.585 |
| 1                              | -3.553 | -2.950 | -0.089 | 1                              | 3.006  | 2.806  | -0.442 |
| 1                              | -2.767 | 1.095  | -1.265 | 1                              | 2.512  | -1.391 | -1.155 |
| 1                              | -1.097 | -3.273 | 0.356  | 1                              | 0.545  | 3.006  | -0.003 |
| 1                              | -0.358 | 0.770  | -0.824 | 1                              | 0.089  | -1.192 | -0.728 |
| 1                              | 3.420  | 1.106  | -0.426 | 1                              | -3.566 | -1.791 | -0.458 |
| 1                              | 2.682  | -2.929 | 0.772  | 1                              | -3.365 | 2.410  | 0.394  |
| 1                              | 5.113  | -3.236 | 1.194  | 1                              | -5.799 | 2.443  | 0.726  |
| 1                              | 7.087  | -2.316 | 1.159  | 1                              | -7.656 | 1.286  | 0.751  |
| 1                              | -7.270 | 2.390  | 2.858  | 1                              | 7.107  | -1.947 | 3.010  |
| 1                              | 6.105  | 2.942  | -0.682 | 1                              | -6.012 | -3.929 | -0.567 |
| 8                              | 7.704  | 3.747  | -0.610 | 8                              | -1.633 | 3.717  | 1.288  |
| 1                              | 8.255  | 3.999  | -1.354 | 1                              | -1.454 | 2.838  | 0.908  |
| 1                              | 8.031  | 2.878  | -0.318 | 1                              | -1.361 | 3.644  | 2.205  |
| Balsalazide                    |        |        |        | Acyclovir                      |        |        |        |
| motif 9, Eint = -6.3 kcal/mol  |        |        |        | motif 1, Eint = -10.8 kcal/mol |        |        |        |
| 8                              | -5.103 | -2.189 | -0.364 | 8                              | -2.024 | 0.683  | -0.113 |
| 8                              | 7.395  | -0.847 | 0.565  | 8                              | 3.997  | -1.832 | -0.860 |
| 8                              | -7.261 | 1.901  | 2.030  | 8                              | -4.606 | -0.043 | -1.084 |
| 8                              | -5.837 | 2.413  | 0.370  | 7                              | -0.131 | -0.405 | 0.618  |
| 8                              | 5.530  | 2.751  | -0.474 | 7                              | 0.985  | -2.223 | -0.082 |
| 8                              | 7.506  | 1.745  | -0.117 | 7                              | 1.579  | 1.293  | 0.426  |
| 7                              | -5.007 | -0.022 | -1.026 | 7                              | 3.607  | 0.362  | -0.332 |
| 7                              | 1.199  | -1.444 | 0.148  | 7                              | 3.467  | 2.626  | 0.229  |
| 7                              | 1.904  | -0.416 | -0.065 | 6                              | 1.137  | 0.019  | 0.314  |
| 6                              | -6.449 | 0.096  | -1.099 | 6                              | -1.228 | 0.416  | 1.023  |
| 6                              | -2.951 | -1.177 | -0.441 | 6                              | 1.812  | -1.121 | -0.108 |
| 6                              | -7.090 | 0.354  | 0.256  | 6                              | -0.158 | -1.764 | 0.346  |
| 6                              | -4.436 | -1.188 | -0.596 | 6                              | 3.190  | -1.011 | -0.478 |
| 6                              | -2.373 | -2.221 | 0.285  | 6                              | -3.208 | 1.377  | 0.213  |
| 6                              | -2.120 | -0.202 | -1.011 | 6                              | 2.841  | 1.408  | 0.094  |
| 6                              | -0.178 | -1.282 | -0.082 | 6                              | -4.134 | 1.298  | -0.969 |
| 6                              | -1.001 | -2.278 | 0.458  | 1                              | -0.820 | 1.343  | 1.449  |
| 6                              | -0.748 | -0.247 | -0.838 | 1                              | -1.826 | -0.117 | 1.773  |
| 6                              | 3.285  | -0.597 | 0.115  | 1                              | -1.075 | -2.319 | 0.487  |
| 6                              | 5.477  | 0.469  | 0.055  | 1                              | -2.999 | 2.431  | 0.455  |
| 6                              | 4.090  | 0.524  | -0.088 | 1                              | -3.690 | 0.919  | 1.092  |
| 6                              | 6.063  | -0.763 | 0.416  | 1                              | 4.592  | 0.507  | -0.517 |
| 6                              | 3.883  | -1.817 | 0.471  | 1                              | -4.976 | 1.988  | -0.824 |
| 6                              | -6.646 | 1.655  | 0.854  | 1                              | -3.593 | 1.600  | -1.874 |
| 6                              | 5.248  | -1.889 | 0.619  | 1                              | 2.810  | 3.383  | 0.348  |
| 6                              | 6.303  | 1.675  | -0.175 | 1                              | 4.191  | 2.837  | -0.443 |
| 1                              | -6.688 | 0.904  | -1.794 | 1                              | -4.833 | -0.218 | -2.000 |
| 1                              | -6.837 | -0.837 | -1.511 | 8                              | -3.370 | -1.804 | 0.836  |
| 1                              | -6.848 | -0.455 | 0.952  | 1                              | -3.745 | -1.317 | 0.085  |
| 1                              | -8.183 | 0.360  | 0.184  | 1                              | -4.080 | -2.379 | 1.126  |
| 1                              | -4.494 | 0.843  | -0.931 |                                |        |        |        |
| 1                              | -3.027 | -2.982 | 0.696  |                                |        |        |        |
| 1                              | -2.542 | 0.584  | -1.629 |                                |        |        |        |
| 1                              | -0.536 | -3.083 | 1.017  |                                |        |        |        |
| 1                              | -0.114 | 0.499  | -1.303 |                                |        |        |        |



|                                |        |        |        |                                |        |        |        |
|--------------------------------|--------|--------|--------|--------------------------------|--------|--------|--------|
| 1                              | 3.621  | 1.463  | -0.367 |                                |        |        |        |
| 1                              | 3.255  | -2.687 | 0.624  |                                |        |        |        |
| 1                              | 5.721  | -2.829 | 0.895  |                                |        |        |        |
| 1                              | 7.621  | -1.751 | 0.811  |                                |        |        |        |
| 1                              | -6.919 | 2.746  | 2.353  |                                |        |        |        |
| 1                              | 6.142  | 3.485  | -0.616 |                                |        |        |        |
| 8                              | 1.351  | 2.458  | -0.505 |                                |        |        |        |
| 1                              | 0.935  | 2.868  | 0.256  |                                |        |        |        |
| 1                              | 1.420  | 1.517  | -0.272 |                                |        |        |        |
| Acyclovir                      |        |        |        | Acyclovir                      |        |        |        |
| motif 2, Eint = -12.9 kcal/mol |        |        |        | motif 3, Eint = -12.7 kcal/mol |        |        |        |
| 8                              | 2.098  | 0.872  | -0.087 | 8                              | 2.821  | 0.143  | 0.025  |
| 8                              | -3.562 | -2.107 | 0.384  | 8                              | -3.474 | -1.603 | 0.525  |
| 8                              | 4.318  | -0.876 | 0.487  | 8                              | 5.428  | -0.505 | 1.104  |
| 7                              | 0.239  | 0.026  | -1.123 | 7                              | 0.833  | -0.674 | -0.804 |
| 7                              | -0.690 | -2.004 | -0.859 | 7                              | -0.546 | -2.354 | -0.232 |
| 7                              | -1.486 | 1.445  | -0.201 | 7                              | -0.630 | 1.230  | -0.543 |
| 7                              | -3.345 | 0.172  | 0.497  | 7                              | -2.789 | 0.550  | 0.138  |
| 7                              | -3.360 | 2.501  | 0.653  | 7                              | -2.320 | 2.790  | -0.285 |
| 6                              | -0.991 | 0.238  | -0.545 | 6                              | -0.370 | -0.092 | -0.496 |
| 6                              | 1.298  | 0.986  | -1.240 | 6                              | 2.043  | 0.013  | -1.136 |
| 6                              | -1.550 | -1.027 | -0.404 | 6                              | -1.209 | -1.148 | -0.155 |
| 6                              | 0.359  | -1.348 | -1.267 | 6                              | 0.658  | -2.035 | -0.610 |
| 6                              | -2.861 | -1.144 | 0.164  | 6                              | -2.560 | -0.855 | 0.200  |
| 6                              | 3.459  | 1.271  | -0.240 | 6                              | 4.016  | 0.858  | -0.220 |
| 6                              | -2.687 | 1.354  | 0.318  | 6                              | -1.875 | 1.496  | -0.218 |
| 6                              | 4.287  | 0.501  | 0.765  | 6                              | 4.883  | 0.798  | 1.006  |
| 1                              | 0.849  | 1.982  | -1.331 | 1                              | 1.770  | 0.996  | -1.548 |
| 1                              | 1.892  | 0.765  | -2.137 | 1                              | 2.588  | -0.558 | -1.904 |
| 1                              | 1.263  | -1.781 | -1.676 | 1                              | 1.478  | -2.722 | -0.769 |
| 1                              | 3.558  | 2.357  | -0.092 | 1                              | 3.788  | 1.907  | -0.469 |
| 1                              | 3.796  | 1.028  | -1.258 | 1                              | 4.558  | 0.422  | -1.074 |
| 1                              | -4.290 | 0.174  | 0.860  | 1                              | -3.746 | 0.824  | 0.376  |
| 1                              | 5.315  | 0.877  | 0.722  | 1                              | 5.675  | 1.557  | 0.913  |
| 1                              | 3.911  | 0.703  | 1.778  | 1                              | 4.275  | 1.051  | 1.885  |
| 1                              | -2.762 | 3.314  | 0.689  | 1                              | -1.579 | 3.474  | -0.315 |
| 1                              | -4.014 | 2.447  | 1.420  | 1                              | -3.105 | 3.046  | 0.294  |
| 1                              | 3.522  | -1.271 | 0.880  | 1                              | 5.811  | -0.610 | 1.977  |
| 8                              | 1.761  | -1.384 | 1.658  | 8                              | -5.495 | 0.222  | 0.849  |
| 1                              | 1.539  | -0.573 | 1.178  | 1                              | -6.067 | 0.193  | 1.618  |
| 1                              | 1.114  | -2.029 | 1.357  | 1                              | -5.037 | -0.643 | 0.826  |
| Acyclovir                      |        |        |        | Acyclovir                      |        |        |        |
| motif 4, Eint = -10.8 kcal/mol |        |        |        | motif 5, Eint = -9.2 kcal/mol  |        |        |        |
| 8                              | 2.023  | 0.684  | 0.113  | 8                              | -2.646 | 0.077  | 0.006  |
| 8                              | -3.995 | -1.833 | 0.861  | 8                              | 3.845  | -0.697 | -0.610 |
| 8                              | 4.605  | -0.045 | 1.085  | 8                              | -5.100 | -1.228 | -0.773 |
| 7                              | 0.131  | -0.404 | -0.619 | 7                              | -0.521 | -0.287 | 0.805  |
| 7                              | -0.984 | -2.222 | 0.082  | 7                              | 1.070  | -1.793 | 0.330  |
| 7                              | -1.580 | 1.293  | -0.427 | 7                              | 0.635  | 1.776  | 0.300  |
| 7                              | -3.607 | 0.361  | 0.332  | 7                              | 2.850  | 1.351  | -0.396 |
| 7                              | -3.469 | 2.625  | -0.229 | 7                              | 2.064  | 3.537  | -0.171 |
| 6                              | -1.137 | 0.020  | -0.315 | 6                              | 0.573  | 0.430  | 0.392  |
| 6                              | 1.228  | 0.418  | -1.023 | 6                              | -1.815 | 0.244  | 1.121  |
| 6                              | -1.811 | -1.121 | 0.108  | 6                              | 1.548  | -0.519 | 0.112  |
| 6                              | 0.159  | -1.763 | -0.346 | 6                              | -0.158 | -1.618 | 0.731  |
| 6                              | -3.190 | -1.012 | 0.478  | 6                              | 2.837  | -0.080 | -0.322 |
| 6                              | 3.208  | 1.377  | -0.212 | 6                              | -3.952 | 0.574  | 0.239  |
| 6                              | -2.841 | 1.407  | -0.094 | 6                              | 1.813  | 2.191  | -0.098 |
| 6                              | 4.134  | 1.297  | 0.971  | 6                              | -4.842 | 0.158  | -0.898 |
| 1                              | 0.820  | 1.344  | -1.449 | 1                              | -1.686 | 1.305  | 1.381  |
| 1                              | 1.826  | -0.115 | -1.773 | 1                              | -2.224 | -0.290 | 1.993  |
| 1                              | 1.076  | -2.318 | -0.488 | 1                              | -0.860 | -2.399 | 0.986  |
| 1                              | 3.000  | 2.432  | -0.454 | 1                              | -3.933 | 1.672  | 0.323  |
| 1                              | 3.690  | 0.919  | -1.091 | 1                              | -4.351 | 0.172  | 1.184  |
| 1                              | -4.592 | 0.505  | 0.518  | 1                              | 3.752  | 1.736  | -0.646 |
| 1                              | 4.976  | 1.987  | 0.826  | 1                              | -5.771 | 0.746  | -0.848 |
| 1                              | 3.593  | 1.599  | 1.875  | 1                              | -4.343 | 0.395  | -1.847 |
| 1                              | -2.812 | 3.383  | -0.348 | 1                              | 1.224  | 4.097  | -0.135 |
| 1                              | -4.193 | 2.835  | 0.443  | 1                              | 2.726  | 3.847  | -0.866 |
| 1                              | 4.834  | -0.219 | 2.000  | 1                              | -5.498 | -1.539 | -1.589 |
| 8                              | 3.370  | -1.803 | -0.838 | 8                              | 3.389  | -3.647 | -0.270 |
| 1                              | 4.080  | -2.380 | -1.127 | 1                              | 2.509  | -3.329 | -0.027 |
| 1                              | 3.745  | -1.316 | -0.086 | 1                              | 3.838  | -2.816 | -0.466 |
| Acyclovir                      |        |        |        | Acyclovir                      |        |        |        |
| motif 6, Eint = -7.6 kcal/mol  |        |        |        | motif 7, Eint = -10.9 kcal/mol |        |        |        |
| 8                              | -2.452 | -0.299 | -0.046 | 8                              | 2.096  | -0.643 | -0.071 |
| 8                              | 3.938  | 0.727  | 0.890  | 8                              | -4.254 | -0.768 | 0.932  |
| 8                              | -5.028 | 0.581  | 0.935  | 8                              | 4.516  | -0.650 | 1.514  |
| 7                              | -0.354 | 0.341  | -0.743 | 7                              | 0.014  | -1.391 | -0.697 |
| 7                              | 1.167  | 1.831  | -0.049 | 7                              | -1.802 | -2.500 | 0.023  |
| 7                              | 0.851  | -1.729 | -0.415 | 7                              | -0.704 | 0.896  | -0.424 |
| 7                              | 3.022  | -1.320 | 0.414  | 7                              | -2.896 | 1.005  | 0.423  |
| 7                              | 2.318  | -3.490 | -0.081 | 7                              | -1.698 | 2.955  | -0.069 |
| 6                              | 0.750  | -0.383 | -0.365 | 6                              | -0.906 | -0.438 | -0.348 |

|                                |        |        |        |                                |        |        |        |
|--------------------------------|--------|--------|--------|--------------------------------|--------|--------|--------|
| 6                              | -1.614 | -0.196 | -1.164 | 6                              | 1.347  | -1.127 | -1.149 |
| 6                              | 1.681  | 0.558  | 0.054  | 6                              | -2.021 | -1.142 | 0.088  |
| 6                              | -0.041 | 1.666  | -0.515 | 6                              | -0.588 | -2.611 | -0.435 |
| 6                              | 2.968  | 0.116  | 0.495  | 6                              | -3.172 | -0.408 | 0.524  |
| 6                              | -3.703 | -0.874 | -0.377 | 6                              | 3.350  | -0.127 | -0.480 |
| 6                              | 2.027  | -2.150 | -0.017 | 6                              | -1.746 | 1.593  | -0.014 |
| 6                              | -4.619 | -0.767 | 0.810  | 6                              | 4.063  | 0.431  | 0.719  |
| 1                              | -1.426 | -1.180 | -1.619 | 1                              | 1.313  | -0.379 | -1.959 |
| 1                              | -2.053 | 0.470  | -1.922 | 1                              | 1.766  | -2.059 | -1.557 |
| 1                              | -0.749 | 2.458  | -0.717 | 1                              | -0.058 | -3.536 | -0.616 |
| 1                              | -3.572 | -1.930 | -0.661 | 1                              | 3.203  | 0.671  | -1.225 |
| 1                              | -4.152 | -0.348 | -1.234 | 1                              | 3.960  | -0.916 | -0.946 |
| 1                              | 3.925  | -1.706 | 0.658  | 1                              | -3.680 | 1.587  | 0.692  |
| 1                              | -5.479 | -1.435 | 0.650  | 1                              | 4.904  | 1.048  | 0.367  |
| 1                              | -4.084 | -1.115 | 1.705  | 1                              | 3.373  | 1.084  | 1.268  |
| 1                              | 1.497  | -4.063 | -0.210 | 1                              | -0.756 | 3.328  | -0.172 |
| 1                              | 2.956  | -3.855 | 0.610  | 1                              | -2.290 | 3.464  | 0.568  |
| 1                              | -5.432 | 0.699  | 1.797  | 1                              | 4.778  | -0.307 | 2.370  |
| 8                              | 1.224  | 4.713  | -0.129 | 8                              | 1.236  | 2.942  | -0.507 |
| 1                              | 1.457  | 3.779  | 0.005  | 1                              | 1.552  | 3.127  | -1.393 |
| 1                              | 1.925  | 5.196  | 0.312  | 1                              | 0.825  | 2.057  | -0.564 |
| Cefprozil                      |        |        |        | Cefprozil                      |        |        |        |
| motif 1, Eint = -7.4 kcal/mol  |        |        |        | motif 2, Eint = -11.2 kcal/mol |        |        |        |
| 16                             | 0.493  | 0.589  | -1.471 | 16                             | 0.197  | -0.524 | -1.862 |
| 8                              | 0.891  | -1.608 | 2.246  | 8                              | 0.884  | -1.584 | 2.499  |
| 8                              | -2.854 | -2.650 | -0.538 | 8                              | -2.772 | -3.078 | -0.631 |
| 8                              | 4.326  | 0.000  | 1.971  | 8                              | 2.952  | 0.870  | 1.895  |
| 8                              | 4.055  | -2.179 | 1.468  | 8                              | 4.139  | -1.049 | 1.903  |
| 8                              | -2.310 | 4.812  | 0.555  | 8                              | -2.514 | 4.377  | 0.182  |
| 7                              | 1.749  | -1.250 | 0.061  | 7                              | 1.603  | -1.538 | 0.242  |
| 7                              | -1.496 | -1.009 | 0.217  | 7                              | -1.576 | -1.519 | 0.495  |
| 7                              | -4.934 | -0.820 | -0.771 | 7                              | -4.848 | -1.422 | -1.032 |
| 6                              | 0.758  | -1.150 | -0.999 | 6                              | 0.620  | -1.916 | -0.773 |
| 6                              | -0.286 | -1.728 | -0.008 | 6                              | -0.363 | -2.262 | 0.386  |
| 6                              | 0.816  | -1.568 | 1.052  | 6                              | 0.744  | -1.769 | 1.323  |
| 6                              | 2.953  | -0.550 | 0.124  | 6                              | 2.616  | -0.599 | 0.097  |
| 6                              | 2.260  | 0.865  | -1.831 | 6                              | 1.955  | -0.205 | -2.271 |
| 6                              | 3.249  | 0.407  | -0.789 | 6                              | 2.842  | 0.035  | -1.078 |
| 6                              | -2.721 | -1.522 | -0.083 | 6                              | -2.719 | -1.992 | -0.077 |
| 6                              | 3.838  | -1.016 | 1.232  | 6                              | 3.346  | -0.317 | 1.376  |
| 6                              | -3.918 | -0.618 | 0.249  | 6                              | -3.961 | -1.102 | 0.076  |
| 6                              | 4.568  | 1.015  | -0.902 | 6                              | 3.932  | 0.984  | -1.263 |
| 6                              | -3.547 | 0.842  | 0.358  | 6                              | -3.637 | 0.371  | 0.122  |
| 6                              | 5.732  | 0.361  | -0.805 | 6                              | 5.171  | 0.873  | -0.763 |
| 6                              | -3.288 | 1.428  | 1.596  | 6                              | -3.637 | 1.074  | 1.324  |
| 6                              | -3.388 | 1.622  | -0.793 | 6                              | -3.271 | 1.049  | -1.046 |
| 6                              | 7.073  | 0.993  | -0.893 | 6                              | 6.246  | 1.883  | -0.945 |
| 6                              | -2.872 | 2.752  | 1.692  | 6                              | -3.275 | 2.416  | 1.372  |
| 6                              | -2.979 | 2.942  | -0.712 | 6                              | -2.903 | 2.383  | -1.012 |
| 6                              | -2.714 | 3.511  | 0.534  | 6                              | -2.897 | 3.069  | 0.203  |
| 1                              | 1.002  | -1.752 | -1.879 | 1                              | 0.954  | -2.762 | -1.379 |
| 1                              | -0.546 | -2.766 | -0.228 | 1                              | -0.587 | -3.331 | 0.435  |
| 1                              | -1.439 | -0.052 | 0.543  | 1                              | -1.509 | -0.560 | 0.829  |
| 1                              | 2.365  | 1.946  | -1.964 | 1                              | 1.952  | 0.683  | -2.908 |
| 1                              | 2.498  | 0.418  | -2.804 | 1                              | 2.324  | -1.028 | -2.893 |
| 1                              | -4.222 | -0.960 | 1.260  | 1                              | -4.369 | -1.385 | 1.066  |
| 1                              | 4.585  | 2.082  | -1.131 | 1                              | 3.705  | 1.843  | -1.898 |
| 1                              | 5.710  | -0.718 | -0.647 | 1                              | 5.429  | -0.018 | -0.192 |
| 1                              | -5.764 | -0.297 | -0.513 | 1                              | -5.802 | -1.169 | -0.801 |
| 1                              | -5.211 | -1.800 | -0.811 | 1                              | -4.815 | -2.425 | -1.192 |
| 1                              | 4.863  | -0.408 | 2.666  | 1                              | 3.412  | 0.973  | 2.741  |
| 1                              | -3.408 | 0.840  | 2.503  | 1                              | -3.918 | 0.564  | 2.243  |
| 1                              | -3.593 | 1.170  | -1.759 | 1                              | -3.290 | 0.508  | -1.988 |
| 1                              | 7.004  | 2.065  | -1.089 | 1                              | 5.913  | 2.727  | -1.553 |
| 1                              | 7.682  | 0.538  | -1.681 | 1                              | 7.129  | 1.444  | -1.421 |
| 1                              | 7.632  | 0.857  | 0.039  | 1                              | 6.587  | 2.276  | 0.019  |
| 1                              | -2.675 | 3.196  | 2.664  | 1                              | -3.272 | 2.950  | 2.318  |
| 1                              | -2.852 | 3.548  | -1.603 | 1                              | -2.615 | 2.912  | -1.914 |
| 1                              | -2.154 | 5.077  | 1.466  | 1                              | -2.513 | 4.713  | 1.083  |
| 8                              | -5.345 | -3.891 | -0.852 | 8                              | -0.154 | 1.061  | 1.068  |
| 1                              | -4.399 | -3.680 | -0.784 | 1                              | 0.048  | 1.089  | 0.122  |
| 1                              | -5.492 | -4.574 | -0.196 | 1                              | 0.709  | 1.109  | 1.497  |
| Cefprozil                      |        |        |        | Cefprozil                      |        |        |        |
| motif 3, Eint = -11.2 kcal/mol |        |        |        | motif 4, Eint = -12.2 kcal/mol |        |        |        |
| 16                             | 0.265  | -0.233 | -1.754 | 16                             | -0.250 | 0.940  | -1.353 |
| 8                              | 0.878  | -1.302 | 2.501  | 8                              | 0.912  | -2.207 | 1.415  |
| 8                              | -2.522 | -3.188 | -0.713 | 8                              | -2.912 | -2.927 | -1.470 |
| 8                              | 3.609  | 0.931  | 1.874  | 8                              | 3.963  | 0.063  | 1.544  |
| 8                              | 4.139  | -1.261 | 1.898  | 8                              | 3.976  | -1.869 | 0.381  |
| 8                              | -3.167 | 4.246  | 0.274  | 8                              | -3.617 | 3.907  | 1.541  |
| 7                              | 1.688  | -1.325 | 0.276  | 7                              | 1.454  | -1.001 | -0.558 |
| 7                              | -1.536 | -1.506 | 0.442  | 7                              | -1.745 | -1.464 | -0.182 |
| 7                              | -4.740 | -1.744 | -1.197 | 7                              | -5.266 | -1.741 | -0.925 |
| 6                              | 0.733  | -1.686 | -0.763 | 6                              | 0.356  | -0.772 | -1.484 |

|                               |        |        |        |                               |        |        |        |
|-------------------------------|--------|--------|--------|-------------------------------|--------|--------|--------|
| 6                             | -0.250 | -2.116 | 0.367  | 6                             | -0.465 | -1.825 | -0.692 |
| 6                             | 0.799  | -1.550 | 1.330  | 6                             | 0.702  | -1.799 | 0.308  |
| 6                             | 2.741  | -0.424 | 0.150  | 6                             | 2.520  | -0.134 | -0.318 |
| 6                             | 2.004  | 0.151  | -2.171 | 6                             | 1.399  | 1.652  | -1.680 |
| 6                             | 2.951  | 0.254  | -1.004 | 6                             | 2.552  | 1.097  | -0.884 |
| 6                             | -2.605 | -2.103 | -0.158 | 6                             | -2.897 | -2.037 | -0.638 |
| 6                             | 3.584  | -0.325 | 1.382  | 6                             | 3.571  | -0.734 | 0.557  |
| 6                             | -3.943 | -1.360 | -0.041 | 6                             | -4.188 | -1.528 | 0.025  |
| 6                             | 4.126  | 1.087  | -1.227 | 6                             | 3.726  | 1.959  | -0.841 |
| 6                             | -3.793 | 0.138  | 0.058  | 6                             | -4.100 | -0.085 | 0.466  |
| 6                             | 5.375  | 0.795  | -0.841 | 6                             | 4.992  | 1.549  | -0.993 |
| 6                             | -3.954 | 0.802  | 1.271  | 6                             | -3.766 | 0.245  | 1.778  |
| 6                             | -3.437 | 0.887  | -1.068 | 6                             | -4.276 | 0.951  | -0.456 |
| 6                             | 6.553  | 1.674  | -1.050 | 6                             | 6.186  | 2.426  | -0.907 |
| 6                             | -3.761 | 2.175  | 1.370  | 6                             | -3.596 | 1.571  | 2.166  |
| 6                             | -3.234 | 2.254  | -0.983 | 6                             | -4.115 | 2.275  | -0.084 |
| 6                             | -3.389 | 2.901  | 0.243  | 6                             | -3.767 | 2.589  | 1.231  |
| 1                             | 1.096  | -2.480 | -1.422 | 1                             | 0.609  | -1.009 | -2.521 |
| 1                             | -0.364 | -3.203 | 0.401  | 1                             | -0.570 | -2.768 | -1.234 |
| 1                             | -1.583 | -0.546 | 0.781  | 1                             | -1.813 | -0.672 | 0.444  |
| 1                             | 1.974  | 1.110  | -2.696 | 1                             | 1.302  | 2.720  | -1.463 |
| 1                             | 2.362  | -0.583 | -2.903 | 1                             | 1.608  | 1.582  | -2.754 |
| 1                             | -4.358 | -1.717 | 0.922  | 1                             | -4.272 | -2.150 | 0.938  |
| 1                             | 3.958  | 2.003  | -1.796 | 1                             | 3.533  | 3.026  | -0.718 |
| 1                             | 5.558  | -0.155 | -0.338 | 1                             | 5.176  | 0.491  | -1.184 |
| 1                             | -5.724 | -1.586 | -1.010 | 1                             | -6.154 | -1.809 | -0.440 |
| 1                             | -4.604 | -2.736 | -1.367 | 1                             | -5.101 | -2.620 | -1.407 |
| 1                             | 4.157  | 0.901  | 2.672  | 1                             | 4.629  | -0.434 | 2.079  |
| 1                             | -4.231 | 0.237  | 2.158  | 1                             | -3.633 | -0.546 | 2.513  |
| 1                             | -3.330 | 0.376  | -2.021 | 1                             | -4.550 | 0.696  | -1.475 |
| 1                             | 6.290  | 2.587  | -1.589 | 1                             | 5.912  | 3.472  | -0.754 |
| 1                             | 7.343  | 1.161  | -1.609 | 1                             | 6.802  | 2.360  | -1.810 |
| 1                             | 7.001  | 1.966  | -0.094 | 1                             | 6.832  | 2.123  | -0.076 |
| 1                             | -3.883 | 2.680  | 2.325  | 1                             | -3.338 | 1.814  | 3.193  |
| 1                             | -2.952 | 2.838  | -1.853 | 1                             | -4.249 | 3.081  | -0.797 |
| 1                             | -3.260 | 4.554  | 1.180  | 1                             | -3.371 | 3.984  | 2.467  |
| 8                             | -0.522 | 1.164  | 1.204  | 8                             | 5.657  | -1.808 | 2.562  |
| 1                             | 0.202  | 1.056  | 1.830  | 1                             | 5.489  | -2.329 | 3.351  |
| 1                             | -0.095 | 1.218  | 0.338  | 1                             | 5.228  | -2.291 | 1.834  |
| Cefprozil                     |        |        |        | Cefprozil                     |        |        |        |
| motif 5, Eint = -8.6 kcal/mol |        |        |        | motif 6, Eint = -7.2 kcal/mol |        |        |        |
| 16                            | -0.019 | 0.697  | -1.281 | 16                            | -0.026 | 0.531  | -1.102 |
| 8                             | 0.794  | -1.709 | 2.278  | 8                             | 0.881  | -2.706 | 1.675  |
| 8                             | -2.629 | -3.170 | -0.847 | 8                             | -2.995 | -2.978 | -1.318 |
| 8                             | 3.955  | 0.511  | 2.173  | 8                             | 4.033  | -0.614 | 1.923  |
| 8                             | 4.045  | -1.589 | 1.379  | 8                             | 4.035  | -2.512 | 0.712  |
| 8                             | -3.744 | 4.142  | 0.497  | 8                             | -2.269 | 3.905  | 1.109  |
| 7                             | 1.556  | -0.935 | 0.170  | 7                             | 1.539  | -1.515 | -0.270 |
| 7                             | -1.650 | -1.423 | 0.225  | 7                             | -1.672 | -1.741 | 0.057  |
| 7                             | -5.022 | -1.938 | -0.946 | 7                             | -5.166 | -1.470 | -0.863 |
| 6                             | 0.604  | -0.979 | -0.924 | 6                             | 0.480  | -1.213 | -1.223 |
| 6                             | -0.311 | -1.847 | -0.017 | 6                             | -0.427 | -2.215 | -0.452 |
| 6                             | 0.713  | -1.552 | 1.092  | 6                             | 0.722  | -2.275 | 0.568  |
| 6                             | 2.609  | -0.036 | 0.300  | 6                             | 2.644  | -0.710 | 0.010  |
| 6                             | 1.656  | 1.373  | -1.546 | 6                             | 1.663  | 1.165  | -1.349 |
| 6                             | 2.715  | 1.028  | -0.532 | 6                             | 2.757  | 0.528  | -0.532 |
| 6                             | -2.728 | -2.115 | -0.248 | 6                             | -2.873 | -2.107 | -0.477 |
| 6                             | 3.611  | -0.457 | 1.314  | 6                             | 3.646  | -1.384 | 0.886  |
| 6                             | -4.099 | -1.504 | 0.090  | 6                             | -4.093 | -1.363 | 0.109  |
| 6                             | 3.916  | 1.850  | -0.608 | 6                             | 3.975  | 1.323  | -0.441 |
| 6                             | -4.068 | 0.000  | 0.224  | 6                             | -3.756 | 0.075  | 0.430  |
| 6                             | 5.167  | 1.370  | -0.627 | 6                             | 5.221  | 0.851  | -0.576 |
| 6                             | -3.956 | 0.607  | 1.473  | 6                             | -3.397 | 0.460  | 1.721  |
| 6                             | -4.076 | 0.815  | -0.913 | 6                             | -3.666 | 1.019  | -0.597 |
| 6                             | 6.395  | 2.202  | -0.690 | 6                             | 6.456  | 1.666  | -0.456 |
| 6                             | -3.844 | 1.989  | 1.595  | 6                             | -2.915 | 1.739  | 1.981  |
| 6                             | -3.970 | 2.192  | -0.807 | 6                             | -3.193 | 2.296  | -0.353 |
| 6                             | -3.849 | 2.784  | 0.451  | 6                             | -2.796 | 2.647  | 0.935  |
| 1                             | 1.016  | -1.446 | -1.821 | 1                             | 0.743  | -1.470 | -2.253 |
| 1                             | -0.336 | -2.892 | -0.333 | 1                             | -0.605 | -3.143 | -1.000 |
| 1                             | -1.802 | -0.506 | 0.625  | 1                             | -1.648 | -0.925 | 0.655  |
| 1                             | 1.533  | 2.460  | -1.577 | 1                             | 1.588  | 2.227  | -1.100 |
| 1                             | 2.002  | 1.079  | -2.545 | 1                             | 1.911  | 1.113  | -2.417 |
| 1                             | -4.329 | -1.922 | 1.090  | 1                             | -4.301 | -1.884 | 1.062  |
| 1                             | 3.762  | 2.925  | -0.717 | 1                             | 3.833  | 2.396  | -0.302 |
| 1                             | 5.306  | 0.289  | -0.604 | 1                             | 5.354  | -0.211 | -0.787 |
| 1                             | -5.974 | -1.919 | -0.599 | 1                             | -6.068 | -1.413 | -0.404 |
| 1                             | -4.795 | -2.897 | -1.196 | 1                             | -5.098 | -2.375 | -1.320 |
| 1                             | 4.596  | 0.121  | 2.785  | 1                             | 4.661  | -1.148 | 2.431  |
| 1                             | -3.954 | -0.009 | 2.370  | 1                             | -3.471 | -0.258 | 2.535  |
| 1                             | -4.176 | 0.346  | -1.887 | 1                             | -3.960 | 0.723  | -1.599 |
| 1                             | 6.163  | 3.267  | -0.750 | 1                             | 6.230  | 2.721  | -0.285 |
| 1                             | 7.016  | 1.935  | -1.551 | 1                             | 7.079  | 1.589  | -1.353 |
| 1                             | 7.022  | 2.045  | 0.195  | 1                             | 7.077  | 1.316  | 0.376  |

|                                |        |        |        |                               |        |        |        |
|--------------------------------|--------|--------|--------|-------------------------------|--------|--------|--------|
| 1                              | -3.761 | 2.448  | 2.576  | 1                             | -2.620 | 2.022  | 2.988  |
| 1                              | -3.974 | 2.826  | -1.686 | 1                             | -3.094 | 3.021  | -1.154 |
| 1                              | -3.660 | 4.417  | 1.414  | 1                             | -2.068 | 4.035  | 2.041  |
| 8                              | 3.546  | -2.476 | -1.366 | 8                             | 0.066  | 3.967  | -0.685 |
| 1                              | 3.731  | -2.425 | -0.415 | 1                             | -0.045 | 4.718  | -1.272 |
| 1                              | 4.079  | -3.212 | -1.673 | 1                             | -0.693 | 4.019  | -0.088 |
| Cefprozil                      |        |        |        | Bumetanide                    |        |        |        |
| motif 7, Eint = -9.1 kcal/mol  |        |        |        | motif 1, Eint = -8.2 kcal/mol |        |        |        |
| 16                             | 0.235  | -0.072 | -1.551 | 16                            | 3.191  | -1.085 | -0.707 |
| 8                              | 0.751  | -0.566 | 2.721  | 8                             | 0.242  | -1.381 | -0.630 |
| 8                              | -2.605 | -2.962 | -0.232 | 8                             | 2.857  | -1.531 | -2.049 |
| 8                              | 3.931  | 1.339  | 1.777  | 8                             | 4.512  | -0.589 | -0.370 |
| 8                              | 4.001  | -0.870 | 2.211  | 8                             | 1.046  | 4.655  | 1.000  |
| 8                              | -3.120 | 4.534  | -0.141 | 8                             | 3.211  | 4.071  | 0.827  |
| 7                              | 1.663  | -0.952 | 0.561  | 7                             | -1.641 | 0.582  | -0.158 |
| 7                              | -1.577 | -1.155 | 0.682  | 7                             | 2.837  | -2.312 | 0.388  |
| 7                              | -4.831 | -1.568 | -0.808 | 6                             | -2.653 | 1.620  | -0.114 |
| 6                              | 0.723  | -1.432 | -0.445 | 6                             | -4.028 | 1.024  | -0.345 |
| 6                              | -0.268 | -1.733 | 0.709  | 6                             | -0.309 | 0.897  | -0.057 |
| 6                              | 0.742  | -1.006 | 1.605  | 6                             | 0.654  | -0.110 | -0.286 |
| 6                              | 2.751  | -0.113 | 0.328  | 6                             | 2.013  | 0.175  | -0.245 |
| 6                              | 1.963  | 0.274  | -2.024 | 6                             | -5.137 | 2.064  | -0.304 |
| 6                              | 2.955  | 0.426  | -0.899 | 6                             | 0.165  | 2.168  | 0.294  |
| 6                              | -2.655 | -1.812 | 0.190  | 6                             | 1.534  | 2.431  | 0.376  |
| 6                              | 3.633  | 0.048  | 1.521  | 6                             | 2.472  | 1.441  | 0.087  |
| 6                              | -3.989 | -1.054 | 0.259  | 6                             | -6.513 | 1.466  | -0.539 |
| 6                              | 4.179  | 1.128  | -1.262 | 6                             | -0.434 | -2.134 | 0.327  |
| 6                              | -3.824 | 0.445  | 0.170  | 6                             | 2.044  | 3.769  | 0.747  |
| 6                              | 5.418  | 0.753  | -0.919 | 6                             | -0.316 | -1.885 | 1.688  |
| 6                              | -3.793 | 1.233  | 1.319  | 6                             | -1.201 | -3.188 | -0.154 |
| 6                              | -3.621 | 1.064  | -1.068 | 6                             | -0.991 | -2.709 | 2.581  |
| 6                              | 6.658  | 1.490  | -1.271 | 6                             | -1.864 | -4.006 | 0.753  |
| 6                              | -3.558 | 2.602  | 1.246  | 6                             | -1.766 | -3.770 | 2.121  |
| 6                              | -3.390 | 2.426  | -1.156 | 1                             | -2.618 | 2.108  | 0.869  |
| 6                              | -3.353 | 3.201  | 0.005  | 1                             | -2.453 | 2.411  | -0.858 |
| 1                              | 1.076  | -2.295 | -1.012 | 1                             | -4.038 | 0.510  | -1.316 |
| 1                              | -0.340 | -2.807 | 0.896  | 1                             | -4.212 | 0.246  | 0.407  |
| 1                              | -1.676 | -0.171 | 0.899  | 1                             | -1.833 | -0.139 | -0.848 |
| 1                              | 1.932  | 1.208  | -2.594 | 1                             | -5.116 | 2.578  | 0.666  |
| 1                              | 2.300  | -0.497 | -2.727 | 1                             | -4.936 | 2.840  | -1.053 |
| 1                              | -4.366 | -1.288 | 1.274  | 1                             | -0.537 | 2.969  | 0.489  |
| 1                              | 4.058  | 2.000  | -1.907 | 1                             | 3.533  | 1.655  | 0.128  |
| 1                              | 5.541  | -0.160 | -0.334 | 1                             | -6.753 | 0.713  | 0.217  |
| 1                              | -5.806 | -1.377 | -0.606 | 1                             | -7.298 | 2.226  | -0.506 |
| 1                              | -4.711 | -2.575 | -0.861 | 1                             | -6.572 | 0.975  | -1.515 |
| 1                              | 4.484  | 1.332  | 2.571  | 1                             | 3.695  | -2.613 | 0.838  |
| 1                              | -3.953 | 0.771  | 2.291  | 1                             | 2.383  | -3.088 | -0.084 |
| 1                              | -3.653 | 0.453  | -1.965 | 1                             | 0.301  | -1.064 | 2.039  |
| 1                              | 6.448  | 2.368  | -1.886 | 1                             | -1.282 | -3.345 | -1.223 |
| 1                              | 7.366  | 0.853  | -1.811 | 1                             | -0.904 | -2.520 | 3.646  |
| 1                              | 7.181  | 1.829  | -0.370 | 1                             | -2.468 | -4.829 | 0.384  |
| 1                              | -3.540 | 3.205  | 2.150  | 1                             | -2.288 | -4.408 | 2.825  |
| 1                              | -3.230 | 2.910  | -2.113 | 1                             | 1.482  | 5.487  | 1.229  |
| 1                              | -3.103 | 4.946  | 0.728  | 8                             | -1.543 | -1.061 | -2.778 |
| 8                              | -0.261 | -4.274 | -1.124 | 1                             | -1.488 | -0.771 | -3.691 |
| 1                              | -0.417 | -5.138 | -1.508 | 1                             | -0.639 | -1.297 | -2.535 |
| 1                              | -1.144 | -3.941 | -0.891 |                               |        |        |        |
| Bumetanide                     |        |        |        | Bumetanide                    |        |        |        |
| motif 2, Eint = -11.4 kcal/mol |        |        |        | motif 3, Eint = -5.6 kcal/mol |        |        |        |
| 16                             | -3.221 | -0.369 | 0.436  | 16                            | 3.541  | 0.012  | -0.634 |
| 8                              | -0.375 | -1.200 | 0.637  | 8                             | 0.923  | -1.408 | -0.838 |
| 8                              | -3.153 | -0.843 | 1.817  | 8                             | 3.574  | -0.474 | -2.000 |
| 8                              | -4.380 | 0.363  | -0.039 | 8                             | 4.510  | 0.971  | -0.135 |
| 8                              | 0.079  | 4.948  | -0.673 | 8                             | -0.797 | 4.488  | 0.702  |
| 8                              | -2.161 | 4.770  | -0.716 | 8                             | 1.428  | 4.763  | 0.666  |
| 7                              | 1.873  | 0.389  | 0.321  | 7                             | -1.607 | -0.351 | -0.403 |
| 7                              | -2.958 | -1.647 | -0.601 | 7                             | 3.566  | -1.301 | 0.419  |
| 6                              | 3.075  | 1.190  | 0.405  | 6                             | -2.943 | 0.215  | -0.456 |
| 6                              | 4.289  | 0.306  | 0.615  | 6                             | -3.985 | -0.869 | -0.639 |
| 6                              | 0.627  | 0.945  | 0.185  | 6                             | -0.502 | 0.450  | -0.278 |
| 6                              | -0.516 | 0.125  | 0.302  | 6                             | 0.787  | -0.097 | -0.450 |
| 6                              | -1.790 | 0.664  | 0.168  | 6                             | 1.920  | 0.699  | -0.320 |
| 6                              | 5.589  | 1.092  | 0.683  | 6                             | -5.399 | -0.309 | -0.671 |
| 6                              | 0.428  | 2.301  | -0.101 | 6                             | -0.594 | 1.809  | 0.051  |
| 6                              | -0.858 | 2.822  | -0.257 | 6                             | 0.553  | 2.592  | 0.196  |
| 6                              | -1.981 | 2.009  | -0.116 | 6                             | 1.822  | 2.044  | 0.005  |
| 6                              | 6.802  | 0.206  | 0.904  | 6                             | -6.456 | -1.383 | -0.857 |
| 6                              | 0.221  | -2.056 | -0.283 | 6                             | 0.591  | -2.416 | 0.053  |
| 6                              | -1.081 | 4.251  | -0.567 | 6                             | 0.484  | 4.025  | 0.536  |
| 6                              | 0.373  | -1.731 | -1.625 | 6                             | 0.361  | -2.193 | 1.406  |
| 6                              | 0.642  | -3.283 | 0.216  | 6                             | 0.536  | -3.697 | -0.486 |
| 6                              | 0.975  | -2.651 | -2.475 | 6                             | 0.059  | -3.277 | 2.222  |
| 6                              | 1.238  | -4.192 | -0.649 | 6                             | 0.238  | -4.770 | 0.345  |
| 6                              | 1.413  | -3.880 | -1.994 | 6                             | -0.005 | -4.566 | 1.701  |

|                                |        |        |        |                               |        |        |        |
|--------------------------------|--------|--------|--------|-------------------------------|--------|--------|--------|
| 1                              | 3.189  | 1.759  | -0.528 | 1                             | -3.132 | 0.763  | 0.474  |
| 1                              | 3.004  | 1.937  | 1.214  | 1                             | -3.027 | 0.964  | -1.260 |
| 1                              | 4.160  | -0.270 | 1.543  | 1                             | -3.787 | -1.419 | -1.570 |
| 1                              | 4.338  | -0.434 | -0.194 | 1                             | -3.890 | -1.604 | 0.171  |
| 1                              | 1.903  | -0.502 | 0.794  | 1                             | -1.466 | -1.196 | -0.940 |
| 1                              | 5.712  | 1.667  | -0.243 | 1                             | -5.587 | 0.246  | 0.257  |
| 1                              | 5.521  | 1.837  | 1.486  | 1                             | -5.475 | 0.434  | -1.475 |
| 1                              | 1.280  | 2.963  | -0.193 | 1                             | -1.574 | 2.247  | 0.185  |
| 1                              | -2.977 | 2.418  | -0.230 | 1                             | 2.711  | 2.653  | 0.114  |
| 1                              | 6.911  | -0.526 | 0.099  | 1                             | -6.424 | -2.118 | -0.048 |
| 1                              | 7.726  | 0.786  | 0.948  | 1                             | -7.464 | -0.962 | -0.878 |
| 1                              | 6.721  | -0.353 | 1.841  | 1                             | -6.309 | -1.927 | -1.795 |
| 1                              | -3.773 | -1.772 | -1.191 | 1                             | 4.403  | -1.250 | 0.991  |
| 1                              | -2.721 | -2.498 | -0.081 | 1                             | 3.535  | -2.171 | -0.103 |
| 1                              | 0.018  | -0.775 | -1.996 | 1                             | 0.426  | -1.189 | 1.810  |
| 1                              | 0.471  | -3.514 | 1.261  | 1                             | 0.730  | -3.833 | -1.545 |
| 1                              | 1.096  | -2.402 | -3.525 | 1                             | -0.122 | -3.109 | 3.278  |
| 1                              | 1.566  | -5.154 | -0.265 | 1                             | 0.195  | -5.770 | -0.072 |
| 1                              | 1.880  | -4.594 | -2.664 | 1                             | -0.239 | -5.405 | 2.346  |
| 1                              | -0.176 | 5.859  | -0.872 | 1                             | -0.697 | 5.431  | 0.893  |
| 8                              | -2.266 | -3.497 | 1.628  | 8                             | -3.539 | 3.351  | 0.708  |
| 1                              | -2.878 | -4.114 | 2.036  | 1                             | -2.727 | 3.871  | 0.767  |
| 1                              | -2.477 | -2.641 | 2.035  | 1                             | -4.062 | 3.636  | 1.461  |
| Bumetanide                     |        |        |        | Bumetanide                    |        |        |        |
| motif 4, Eint = -6.7 kcal/mol  |        |        |        | motif 5, Eint = -9.8 kcal/mol |        |        |        |
| 16                             | 2.792  | -1.409 | -0.943 | 16                            | 2.973  | -0.387 | -0.951 |
| 8                              | -0.221 | -1.458 | -0.949 | 8                             | 0.109  | -1.220 | -0.975 |
| 8                              | 2.548  | -1.919 | -2.276 | 8                             | 2.807  | -0.775 | -2.338 |
| 8                              | 4.112  | -0.956 | -0.525 | 8                             | 4.155  | 0.353  | -0.514 |
| 8                              | 1.176  | 4.529  | 0.542  | 8                             | -0.231 | 4.770  | 0.948  |
| 8                              | 3.227  | 3.616  | 0.652  | 8                             | 2.002  | 4.623  | 0.737  |
| 7                              | -1.922 | 0.640  | -0.352 | 7                             | -2.092 | 0.287  | -0.263 |
| 7                              | 2.280  | -2.550 | 0.174  | 7                             | 2.831  | -1.722 | 0.033  |
| 6                              | -2.871 | 1.732  | -0.281 | 6                             | -3.298 | 1.083  | -0.171 |
| 6                              | -4.291 | 1.214  | -0.398 | 6                             | -4.527 | 0.212  | -0.346 |
| 6                              | -0.567 | 0.848  | -0.343 | 6                             | -0.842 | 0.852  | -0.209 |
| 6                              | 0.301  | -0.236 | -0.609 | 6                             | 0.287  | 0.066  | -0.523 |
| 6                              | 1.678  | -0.052 | -0.612 | 6                             | 1.566  | 0.607  | -0.470 |
| 6                              | -5.332 | 2.319  | -0.300 | 6                             | -5.827 | 0.995  | -0.234 |
| 6                              | 0.008  | 2.086  | -0.028 | 6                             | -0.624 | 2.179  | 0.179  |
| 6                              | 1.395  | 2.243  | -0.006 | 6                             | 0.668  | 2.704  | 0.246  |
| 6                              | 2.235  | 1.184  | -0.329 | 6                             | 1.774  | 1.923  | -0.085 |
| 6                              | -6.753 | 1.800  | -0.424 | 6                             | -7.056 | 0.124  | -0.417 |
| 6                              | -0.902 | -2.191 | 0.013  | 6                             | -0.336 | -2.189 | -0.089 |
| 6                              | 2.043  | 3.500  | 0.416  | 6                             | 0.915  | 4.103  | 0.657  |
| 6                              | -0.837 | -1.905 | 1.371  | 6                             | -0.341 | -2.015 | 1.290  |
| 6                              | -1.643 | -3.267 | -0.464 | 6                             | -0.755 | -3.383 | -0.667 |
| 6                              | -1.539 | -2.711 | 2.260  | 6                             | -0.785 | -3.057 | 2.095  |
| 6                              | -2.335 | -4.065 | 0.439  | 6                             | -1.192 | -4.416 | 0.154  |
| 6                              | -2.290 | -3.789 | 1.803  | 6                             | -1.213 | -4.257 | 1.536  |
| 1                              | -2.744 | 2.249  | 0.680  | 1                             | -3.327 | 1.569  | 0.813  |
| 1                              | -2.674 | 2.484  | -1.064 | 1                             | -3.299 | 1.897  | -0.917 |
| 1                              | -4.406 | 0.686  | -1.355 | 1                             | -4.483 | -0.284 | -1.326 |
| 1                              | -4.465 | 0.464  | 0.384  | 1                             | -4.507 | -0.591 | 0.401  |
| 1                              | -2.231 | -0.177 | -0.861 | 1                             | -2.162 | -0.541 | -0.839 |
| 1                              | -5.210 | 2.845  | 0.655  | 1                             | -5.865 | 1.493  | 0.743  |
| 1                              | -5.139 | 3.068  | -1.077 | 1                             | -5.829 | 1.803  | -0.977 |
| 1                              | -0.625 | 2.932  | 0.208  | 1                             | -1.465 | 2.816  | 0.421  |
| 1                              | 3.306  | 1.321  | -0.346 | 1                             | 2.774  | 2.336  | -0.035 |
| 1                              | -6.982 | 1.075  | 0.362  | 1                             | -7.095 | -0.670 | 0.335  |
| 1                              | -7.487 | 2.606  | -0.350 | 1                             | -7.979 | 0.701  | -0.332 |
| 1                              | -6.911 | 1.299  | -1.383 | 1                             | -7.060 | -0.359 | -1.398 |
| 1                              | 3.038  | -2.780 | 0.808  | 1                             | 3.686  | -1.859 | 0.580  |
| 1                              | 1.926  | -3.375 | -0.299 | 1                             | 2.581  | -2.539 | -0.514 |
| 1                              | -0.236 | -1.074 | 1.724  | 1                             | 0.010  | -1.084 | 1.720  |
| 1                              | -1.662 | -3.464 | -1.530 | 1                             | -0.728 | -3.485 | -1.746 |
| 1                              | -1.491 | -2.493 | 3.322  | 1                             | -0.790 | -2.927 | 3.173  |
| 1                              | -2.913 | -4.906 | 0.071  | 1                             | -1.518 | -5.349 | -0.293 |
| 1                              | -2.832 | -4.413 | 2.504  | 1                             | -1.555 | -5.065 | 2.174  |
| 1                              | 1.695  | 5.285  | 0.848  | 1                             | 0.039  | 5.663  | 1.200  |
| 8                              | 4.440  | 0.923  | 1.956  | 8                             | 5.378  | -1.294 | 1.378  |
| 1                              | 4.537  | 0.354  | 1.183  | 1                             | 6.273  | -1.622 | 1.266  |
| 1                              | 4.269  | 1.797  | 1.586  | 1                             | 5.322  | -0.510 | 0.811  |
| Bumetanide                     |        |        |        | Didanosine                    |        |        |        |
| motif 6, Eint = -12.0 kcal/mol |        |        |        | motif 1, Eint = -7.4 kcal/mol |        |        |        |
| 16                             | 1.376  | -3.043 | -0.746 | 8                             | 2.357  | -0.302 | 0.532  |
| 8                              | -1.099 | -1.367 | -0.808 | 8                             | 2.836  | 0.982  | -1.903 |
| 8                              | 0.890  | -3.285 | -2.090 | 8                             | -3.942 | 1.769  | -0.652 |
| 8                              | 2.697  | -3.467 | -0.318 | 7                             | 0.058  | 0.057  | 0.895  |
| 8                              | 3.388  | 2.837  | 0.558  | 7                             | -1.030 | 1.964  | 0.387  |
| 8                              | 4.677  | 0.994  | 0.433  | 7                             | -1.699 | -1.573 | 0.370  |
| 7                              | -1.304 | 1.349  | -0.352 | 7                             | -3.649 | -0.492 | -0.389 |
| 7                              | 0.277  | -3.681 | 0.359  | 6                             | 1.249  | -0.732 | 1.287  |
| 6                              | -1.448 | 2.790  | -0.398 | 6                             | 1.142  | -2.208 | 0.970  |

|                               |        |        |        |                                |        |        |        |
|-------------------------------|--------|--------|--------|--------------------------------|--------|--------|--------|
| 6                             | -2.906 | 3.174  | -0.560 | 6                              | 1.443  | -2.225 | -0.528 |
| 6                             | -0.072 | 0.745  | -0.289 | 6                              | 2.369  | -1.020 | -0.727 |
| 6                             | 0.025  | -0.650 | -0.474 | 6                              | 1.933  | -0.106 | -1.849 |
| 6                             | 1.257  | -1.290 | -0.410 | 6                              | -1.200 | -0.311 | 0.466  |
| 6                             | -3.120 | 4.680  | -0.589 | 6                              | 0.085  | 1.438  | 0.825  |
| 6                             | 1.107  | 1.448  | -0.012 | 6                              | -1.845 | 0.887  | 0.161  |
| 6                             | 2.334  | 0.789  | 0.071  | 6                              | -3.199 | 0.870  | -0.323 |
| 6                             | 2.421  | -0.586 | -0.136 | 6                              | -2.926 | -1.593 | -0.061 |
| 6                             | -4.579 | 5.063  | -0.762 | 1                              | 1.471  | -0.499 | 2.331  |
| 6                             | -2.089 | -1.551 | 0.145  | 1                              | 0.183  | -2.651 | 1.223  |
| 6                             | 3.582  | 1.528  | 0.367  | 1                              | 1.932  | -2.713 | 1.532  |
| 6                             | -1.909 | -1.274 | 1.495  | 1                              | 1.901  | -3.158 | -0.856 |
| 6                             | -3.289 | -2.071 | -0.331 | 1                              | 0.515  | -2.097 | -1.096 |
| 6                             | -2.957 | -1.516 | 2.375  | 1                              | 3.414  | -1.307 | -0.885 |
| 6                             | -4.325 | -2.311 | 0.564  | 1                              | 0.902  | 0.233  | -1.668 |
| 6                             | -4.166 | -2.032 | 1.918  | 1                              | 1.934  | -0.682 | -2.789 |
| 1                             | -1.055 | 3.214  | 0.536  | 1                              | 0.984  | 1.984  | 1.091  |
| 1                             | -0.847 | 3.227  | -1.212 | 1                              | 2.485  | 1.637  | -2.512 |
| 1                             | -3.296 | 2.731  | -1.487 | 1                              | -3.433 | -2.548 | -0.176 |
| 1                             | -3.488 | 2.727  | 0.256  | 1                              | -4.601 | -0.603 | -0.716 |
| 1                             | -2.007 | 0.828  | -0.859 | 8                              | 3.189  | 2.342  | 1.162  |
| 1                             | -2.728 | 5.118  | 0.337  | 1                              | 3.144  | 1.476  | 0.732  |
| 1                             | -2.522 | 5.116  | -1.399 | 1                              | 3.582  | 2.910  | 0.497  |
| 1                             | 1.077  | 2.521  | 0.131  |                                |        |        |        |
| 1                             | 3.376  | -1.094 | -0.078 |                                |        |        |        |
| 1                             | -5.193 | 4.668  | 0.052  |                                |        |        |        |
| 1                             | -4.715 | 6.146  | -0.779 |                                |        |        |        |
| 1                             | -4.986 | 4.666  | -1.697 |                                |        |        |        |
| 1                             | 0.738  | -4.400 | 0.906  |                                |        |        |        |
| 1                             | -0.530 | -4.059 | -0.129 |                                |        |        |        |
| 1                             | -0.959 | -0.887 | 1.848  |                                |        |        |        |
| 1                             | -3.389 | -2.282 | -1.390 |                                |        |        |        |
| 1                             | -2.822 | -1.302 | 3.430  |                                |        |        |        |
| 1                             | -5.261 | -2.717 | 0.196  |                                |        |        |        |
| 1                             | -4.977 | -2.218 | 2.613  |                                |        |        |        |
| 1                             | 4.265  | 3.247  | 0.745  |                                |        |        |        |
| 8                             | 6.039  | 3.327  | 0.916  |                                |        |        |        |
| 1                             | 6.020  | 2.360  | 0.803  |                                |        |        |        |
| 1                             | 6.544  | 3.490  | 1.715  |                                |        |        |        |
| Didanosine                    |        |        |        | Didanosine                     |        |        |        |
| motif 2, Eint = -9.1 kcal/mol |        |        |        | motif 3, Eint = -12.2 kcal/mol |        |        |        |
| 8                             | -2.623 | -0.263 | -0.980 | 8                              | 2.893  | 0.253  | -0.934 |
| 8                             | -3.960 | 2.100  | -0.166 | 8                              | 4.486  | -1.838 | 0.148  |
| 8                             | 4.045  | 0.859  | 0.208  | 8                              | -3.603 | -1.662 | 0.154  |
| 7                             | -0.317 | -0.402 | -0.610 | 7                              | 0.575  | 0.110  | -0.647 |
| 7                             | 1.070  | 1.364  | -0.541 | 7                              | -0.577 | -1.818 | -0.485 |
| 7                             | 1.239  | -2.196 | -0.072 | 7                              | -1.217 | 1.715  | -0.275 |
| 7                             | 3.403  | -1.340 | 0.305  | 7                              | -3.269 | 0.612  | 0.109  |
| 6                             | -1.571 | -1.166 | -0.860 | 6                              | 1.723  | 1.010  | -0.930 |
| 6                             | -1.920 | -2.075 | 0.305  | 6                              | 1.902  | 2.058  | 0.154  |
| 6                             | -2.622 | -1.106 | 1.245  | 6                              | 2.679  | 1.274  | 1.203  |
| 6                             | -3.321 | -0.142 | 0.289  | 6                              | 3.537  | 0.330  | 0.364  |
| 6                             | -3.301 | 1.285  | 0.778  | 6                              | 3.671  | -1.040 | 0.981  |
| 6                             | 0.921  | -0.892 | -0.284 | 6                              | -0.727 | 0.454  | -0.387 |
| 6                             | -0.156 | 0.954  | -0.768 | 6                              | 0.589  | -1.267 | -0.712 |
| 6                             | 1.759  | 0.220  | -0.235 | 6                              | -1.415 | -0.755 | -0.280 |
| 6                             | 3.145  | 0.049  | 0.096  | 6                              | -2.819 | -0.733 | 0.005  |
| 6                             | 2.498  | -2.352 | 0.216  | 6                              | -2.497 | 1.718  | -0.028 |
| 1                             | -1.447 | -1.688 | -1.814 | 1                              | 1.575  | 1.426  | -1.932 |
| 1                             | -1.053 | -2.578 | 0.729  | 1                              | 0.960  | 2.478  | 0.501  |
| 1                             | -2.614 | -2.838 | -0.061 | 1                              | 2.510  | 2.868  | -0.258 |
| 1                             | -3.319 | -1.595 | 1.926  | 1                              | 3.277  | 1.908  | 1.859  |
| 1                             | -1.889 | -0.566 | 1.855  | 1                              | 1.992  | 0.699  | 1.835  |
| 1                             | -4.358 | -0.437 | 0.088  | 1                              | 4.539  | 0.737  | 0.178  |
| 1                             | -2.257 | 1.600  | 0.935  | 1                              | 2.669  | -1.477 | 1.112  |
| 1                             | -3.800 | 1.311  | 1.761  | 1                              | 4.110  | -0.917 | 1.985  |
| 1                             | -0.988 | 1.575  | -1.063 | 1                              | 1.505  | -1.791 | -0.943 |
| 1                             | -3.932 | 3.009  | 0.144  | 1                              | 4.544  | -2.716 | 0.531  |
| 1                             | 2.883  | -3.350 | 0.404  | 1                              | -3.013 | 2.668  | 0.081  |
| 1                             | 4.365  | -1.557 | 0.538  | 1                              | -4.271 | 0.709  | 0.301  |
| 8                             | 2.839  | 3.606  | 0.421  | 8                              | -5.877 | -0.230 | 0.728  |
| 1                             | 2.108  | 3.129  | 0.007  | 1                              | -6.708 | -0.406 | 0.283  |
| 1                             | 3.526  | 2.929  | 0.422  | 1                              | -5.316 | -1.012 | 0.564  |
| Didanosine                    |        |        |        | Didanosine                     |        |        |        |
| motif 4, Eint = -7.8 kcal/mol |        |        |        | motif 5, Eint = -6.8 kcal/mol  |        |        |        |
| 8                             | 2.284  | 0.184  | -0.839 | 8                              | 1.848  | 0.285  | -1.055 |
| 8                             | 4.603  | -1.485 | -0.599 | 8                              | 3.691  | -1.682 | -0.101 |
| 8                             | -4.064 | -2.240 | 0.234  | 8                              | -4.512 | -1.803 | 0.503  |
| 7                             | 0.016  | -0.171 | -0.399 | 7                              | -0.434 | 0.067  | -0.589 |
| 7                             | -0.998 | -2.179 | -0.332 | 7                              | -1.502 | -1.892 | -0.291 |
| 7                             | -1.886 | 1.292  | -0.005 | 7                              | -2.258 | 1.625  | -0.181 |
| 7                             | -3.857 | 0.045  | 0.301  | 7                              | -4.240 | 0.471  | 0.357  |
| 6                             | 1.095  | 0.846  | -0.526 | 6                              | 0.657  | 1.003  | -0.965 |
| 6                             | 1.329  | 1.577  | 0.788  | 6                              | 0.881  | 2.066  | 0.096  |

|                                |        |        |        |                               |         |        |        |
|--------------------------------|--------|--------|--------|-------------------------------|---------|--------|--------|
| 6                              | 2.327  | 0.659  | 1.474  | 6                             | 1.771   | 1.324  | 1.083  |
| 6                              | 3.174  | 0.181  | 0.306  | 6                             | 2.608   | 0.428  | 0.177  |
| 6                              | 3.769  | -1.189 | 0.501  | 6                             | 2.885   | -0.921 | 0.792  |
| 6                              | -1.308 | 0.067  | -0.156 | 6                             | -1.732  | 0.374  | -0.269 |
| 6                              | 0.133  | -1.537 | -0.503 | 6                             | -0.370  | -1.308 | -0.603 |
| 6                              | -1.914 | -1.188 | -0.112 | 6                             | -2.367  | -0.853 | -0.079 |
| 6                              | -3.326 | -1.285 | 0.143  | 6                             | -3.759  | -0.880 | 0.280  |
| 6                              | -3.167 | 1.209  | 0.222  | 6                             | -3.520  | 1.602  | 0.134  |
| 1                              | 0.811  | 1.514  | -1.344 | 1                             | 0.415   | 1.405  | -1.954 |
| 1                              | 0.408  | 1.751  | 1.344  | 1                             | -0.048  | 2.450  | 0.514  |
| 1                              | 1.764  | 2.553  | 0.563  | 1                             | 1.420   | 2.898  | -0.366 |
| 1                              | 2.919  | 1.157  | 2.243  | 1                             | 2.387   | 1.985  | 1.693  |
| 1                              | 1.817  | -0.192 | 1.943  | 1                             | 1.162   | 0.717  | 1.764  |
| 1                              | 3.983  | 0.889  | 0.083  | 1                             | 3.560   | 0.896  | -0.098 |
| 1                              | 2.955  | -1.924 | 0.608  | 1                             | 1.938   | -1.436 | 1.001  |
| 1                              | 4.332  | -1.182 | 1.448  | 1                             | 3.404   | -0.760 | 1.749  |
| 1                              | 1.088  | -1.985 | -0.734 | 1                             | 0.549   | -1.807 | -0.870 |
| 1                              | 4.942  | -2.377 | -0.493 | 1                             | 3.770   | -2.574 | 0.248  |
| 1                              | -3.743 | 2.120  | 0.361  | 1                             | -4.062  | 2.539  | 0.233  |
| 1                              | -4.852 | 0.075  | 0.483  | 1                             | -5.220  | 0.550  | 0.598  |
| 8                              | -0.353 | 3.717  | -0.620 | 8                             | 5.906   | 0.050  | 0.271  |
| 1                              | -0.802 | 4.247  | -1.280 | 1                             | 5.337   | -0.658 | -0.066 |
| 1                              | -0.971 | 2.990  | -0.423 | 1                             | 6.643   | 0.086  | -0.341 |
| Didanosine                     |        |        |        | Buspirone                     |         |        |        |
| motif 6, Eint = -13.1 kcal/mol |        |        |        | motif 1, Eint = -8.3 kcal/mol |         |        |        |
| 8                              | -2.457 | -0.727 | -0.972 | 8                             | 3.630   | 2.270  | 0.374  |
| 8                              | -3.014 | 1.806  | 0.176  | 8                             | 3.370   | -2.240 | -0.168 |
| 8                              | 3.776  | 1.656  | 0.264  | 7                             | 3.514   | 0.005  | 0.180  |
| 7                              | -0.135 | -0.534 | -0.835 | 7                             | -2.732  | 0.577  | -0.017 |
| 7                              | 0.869  | 1.476  | -0.810 | 7                             | -5.519  | 0.021  | 0.090  |
| 7                              | 1.676  | -1.923 | 0.034  | 7                             | -7.211  | -1.493 | 0.557  |
| 7                              | 3.573  | -0.616 | 0.531  | 7                             | -7.665  | 0.570  | -0.592 |
| 6                              | -1.285 | -1.471 | -1.019 | 6                             | 6.299   | -0.091 | -0.388 |
| 6                              | -1.407 | -2.492 | 0.098  | 6                             | 6.719   | -0.360 | 1.067  |
| 6                              | -2.155 | -1.712 | 1.179  | 6                             | 7.656   | -0.105 | -1.097 |
| 6                              | -2.869 | -0.587 | 0.415  | 6                             | 7.825   | -1.418 | 0.967  |
| 6                              | -2.520 | 0.777  | 0.988  | 6                             | 8.429   | -1.259 | -0.448 |
| 6                              | 1.133  | -0.736 | -0.343 | 6                             | 5.543   | 1.213  | -0.570 |
| 6                              | -0.220 | 0.806  | -1.111 | 6                             | 5.392   | -1.205 | -0.908 |
| 6                              | 1.731  | 0.523  | -0.331 | 6                             | 4.163   | 1.227  | 0.034  |
| 6                              | 3.076  | 0.673  | 0.151  | 6                             | 4.025   | -1.227 | -0.276 |
| 6                              | 2.898  | -1.793 | 0.461  | 6                             | 2.169   | -0.002 | 0.780  |
| 1                              | -1.199 | -1.907 | -2.018 | 6                             | 1.074   | 0.222  | -0.248 |
| 1                              | -0.451 | -2.902 | 0.418  | 6                             | -0.305  | 0.180  | 0.392  |
| 1                              | -2.020 | -3.311 | -0.286 | 6                             | -1.391  | 0.579  | -0.590 |
| 1                              | -2.846 | -2.344 | 1.738  | 6                             | -3.219  | -0.772 | 0.238  |
| 1                              | -1.453 | -1.285 | 1.904  | 6                             | -3.670  | 1.259  | -0.898 |
| 1                              | -3.957 | -0.702 | 0.389  | 6                             | -4.583  | -0.746 | 0.896  |
| 1                              | -1.430 | 0.855  | 1.118  | 6                             | -5.045  | 1.348  | -0.270 |
| 1                              | -2.949 | 0.814  | 2.006  | 6                             | -6.842  | -0.309 | 0.022  |
| 1                              | -1.145 | 1.233  | -1.471 | 6                             | -8.492  | -1.812 | 0.434  |
| 1                              | -2.398 | 2.553  | 0.252  | 6                             | -8.936  | 0.204  | -0.689 |
| 1                              | 3.442  | -2.674 | 0.791  | 6                             | -9.428  | -0.998 | -0.193 |
| 1                              | 4.524  | -0.612 | 0.880  | 1                             | 5.889   | -0.668 | 1.710  |
| 8                              | -0.765 | 3.515  | 0.368  | 1                             | 7.116   | 0.571  | 1.491  |
| 1                              | 0.006  | 3.079  | -0.039 | 1                             | 8.160   | 0.850  | -0.902 |
| 1                              | -0.612 | 4.456  | 0.269  | 1                             | 7.565   | -0.198 | -2.184 |
|                                |        |        |        | 1                             | 7.412   | -2.422 | 1.099  |
|                                |        |        |        | 1                             | 8.571   | -1.294 | 1.754  |
|                                |        |        |        | 1                             | 9.503   | -1.064 | -0.425 |
|                                |        |        |        | 1                             | 8.302   | -2.179 | -1.026 |
|                                |        |        |        | 1                             | 5.421   | 1.430  | -1.641 |
|                                |        |        |        | 1                             | 6.082   | 2.066  | -0.149 |
|                                |        |        |        | 1                             | 5.819   | -2.200 | -0.765 |
|                                |        |        |        | 1                             | 5.246   | -1.089 | -1.991 |
|                                |        |        |        | 1                             | 2.144   | 0.779  | 1.541  |
|                                |        |        |        | 1                             | 2.050   | -0.972 | 1.266  |
|                                |        |        |        | 1                             | 1.154   | -0.542 | -1.032 |
|                                |        |        |        | 1                             | 1.226   | 1.195  | -0.730 |
|                                |        |        |        | 1                             | -0.486  | -0.827 | 0.787  |
|                                |        |        |        | 1                             | -0.335  | 0.870  | 1.242  |
|                                |        |        |        | 1                             | -1.346  | -0.070 | -1.491 |
|                                |        |        |        | 1                             | -1.185  | 1.599  | -0.935 |
|                                |        |        |        | 1                             | -2.520  | -1.291 | 0.899  |
|                                |        |        |        | 1                             | -3.275  | -1.355 | -0.705 |
|                                |        |        |        | 1                             | -3.747  | 0.743  | -1.877 |
|                                |        |        |        | 1                             | -3.294  | 2.269  | -1.092 |
|                                |        |        |        | 1                             | -4.976  | -1.753 | 1.021  |
|                                |        |        |        | 1                             | -4.498  | -0.289 | 1.894  |
|                                |        |        |        | 1                             | -4.996  | 1.977  | 0.632  |
|                                |        |        |        | 1                             | -5.761  | 1.798  | -0.955 |
|                                |        |        |        | 1                             | -8.786  | -2.769 | 0.865  |
|                                |        |        |        | 1                             | -9.596  | 0.914  | -1.186 |
|                                |        |        |        | 1                             | -10.470 | -1.275 | -0.280 |

|                               |         |        |        |                               |         |        |        |
|-------------------------------|---------|--------|--------|-------------------------------|---------|--------|--------|
|                               |         |        |        | 8                             | 0.967   | 3.092  | 1.026  |
|                               |         |        |        | 1                             | 1.899   | 2.921  | 0.823  |
|                               |         |        |        | 1                             | 0.965   | 3.963  | 1.427  |
| Buspirone                     |         |        |        | Buspirone                     |         |        |        |
| motif 2, Eint = -8.2 kcal/mol |         |        |        | motif 3, Eint = -9.0 kcal/mol |         |        |        |
| 8                             | 3.309   | -2.573 | -1.017 | 8                             | 3.880   | -2.515 | -1.034 |
| 8                             | 3.269   | 1.697  | 0.528  | 8                             | 3.135   | 1.684  | 0.548  |
| 7                             | 3.300   | -0.423 | -0.279 | 7                             | 3.523   | -0.384 | -0.317 |
| 7                             | -2.955  | -0.807 | -0.010 | 7                             | -2.704  | -1.012 | -0.061 |
| 7                             | -5.724  | -0.164 | -0.119 | 7                             | -5.441  | -0.243 | -0.123 |
| 7                             | -7.369  | 1.379  | -0.651 | 7                             | -7.023  | 1.383  | -0.595 |
| 7                             | -7.876  | -0.596 | 0.622  | 7                             | -7.612  | -0.621 | 0.596  |
| 6                             | 6.096   | -0.546 | 0.195  | 6                             | 6.289   | -0.129 | 0.289  |
| 6                             | 6.479   | 0.090  | -1.152 | 6                             | 6.667   | 0.482  | -1.072 |
| 6                             | 7.472   | -0.728 | 0.841  | 6                             | 7.643   | -0.119 | 1.005  |
| 6                             | 7.607   | 1.074  | -0.816 | 6                             | 7.656   | 1.605  | -0.737 |
| 6                             | 8.234   | 0.557  | 0.499  | 6                             | 8.281   | 1.222  | 0.625  |
| 6                             | 5.314   | -1.842 | 0.063  | 6                             | 5.677   | -1.515 | 0.183  |
| 6                             | 5.233   | 0.413  | 1.013  | 6                             | 5.275   | 0.750  | 1.018  |
| 6                             | 3.911   | -1.679 | -0.462 | 6                             | 4.310   | -1.546 | -0.449 |
| 6                             | 3.874   | 0.641  | 0.414  | 6                             | 3.899   | 0.743  | 0.406  |
| 6                             | 1.953   | -0.238 | -0.834 | 6                             | 2.177   | -0.404 | -0.913 |
| 6                             | 0.866   | -0.628 | 0.154  | 6                             | 1.117   | -0.869 | 0.069  |
| 6                             | -0.525  | -0.437 | -0.431 | 6                             | -0.273  | -0.827 | -0.547 |
| 6                             | -1.614  | -0.817 | 0.558  | 6                             | -1.354  | -1.103 | 0.482  |
| 6                             | -3.401  | 0.541  | -0.345 | 6                             | -3.090  | 0.371  | -0.320 |
| 6                             | -3.906  | -1.405 | 0.918  | 6                             | -3.673  | -1.604 | 0.852  |
| 6                             | -4.776  | 0.519  | -0.983 | 6                             | -4.463  | 0.442  | -0.955 |
| 6                             | -5.291  | -1.484 | 0.310  | 6                             | -5.064  | -1.597 | 0.252  |
| 6                             | -7.035  | 0.215  | -0.053 | 6                             | -6.735  | 0.184  | -0.044 |
| 6                             | -8.637  | 1.750  | -0.530 | 6                             | -8.276  | 1.798  | -0.460 |
| 6                             | -9.133  | -0.181 | 0.715  | 6                             | -8.851  | -0.160 | 0.704  |
| 6                             | -9.590  | 1.007  | 0.156  | 6                             | -9.260  | 1.066  | 0.194  |
| 1                             | 5.634   | 0.571  | -1.659 | 1                             | 5.803   | 0.829  | -1.648 |
| 1                             | 6.837   | -0.702 | -1.821 | 1                             | 7.155   | -0.292 | -1.676 |
| 1                             | 7.959   | -1.598 | 0.383  | 1                             | 8.245   | -0.951 | 0.620  |
| 1                             | 7.411   | -0.928 | 1.916  | 1                             | 7.552   | -0.268 | 2.085  |
| 1                             | 7.204   | 2.081  | -0.677 | 1                             | 7.140   | 2.567  | -0.667 |
| 1                             | 8.336   | 1.137  | -1.627 | 1                             | 8.407   | 1.725  | -1.521 |
| 1                             | 9.309   | 0.379  | 0.412  | 1                             | 9.370   | 1.155  | 0.581  |
| 1                             | 8.112   | 1.298  | 1.295  | 1                             | 8.055   | 1.981  | 1.379  |
| 1                             | 5.228   | -2.329 | 1.045  | 1                             | 5.576   | -1.957 | 1.184  |
| 1                             | 5.813   | -2.564 | -0.589 | 1                             | 6.307   | -2.202 | -0.389 |
| 1                             | 5.700   | 1.391  | 1.143  | 1                             | 5.585   | 1.796  | 1.077  |
| 1                             | 5.077   | 0.004  | 2.022  | 1                             | 5.164   | 0.409  | 2.056  |
| 1                             | 1.891   | -0.853 | -1.733 | 1                             | 2.226   | -1.068 | -1.777 |
| 1                             | 1.863   | 0.813  | -1.112 | 1                             | 1.958   | 0.607  | -1.262 |
| 1                             | 0.976   | -0.027 | 1.065  | 1                             | 1.140   | -0.220 | 0.953  |
| 1                             | 1.008   | -1.676 | 0.445  | 1                             | 1.359   | -1.883 | 0.411  |
| 1                             | -0.638  | 0.608  | -0.744 | 1                             | -0.423  | 0.164  | -0.986 |
| 1                             | -0.641  | -1.044 | -1.337 | 1                             | -0.354  | -1.555 | -1.363 |
| 1                             | -1.553  | -0.159 | 1.450  | 1                             | -1.225  | -0.413 | 1.341  |
| 1                             | -1.424  | -1.835 | 0.919  | 1                             | -1.227  | -2.118 | 0.880  |
| 1                             | -2.697  | 0.991  | -1.049 | 1                             | -2.361  | 0.833  | -0.990 |
| 1                             | -3.423  | 1.184  | 0.559  | 1                             | -3.084  | 0.960  | 0.619  |
| 1                             | -3.955  | -0.830 | 1.865  | 1                             | -3.690  | -1.067 | 1.822  |
| 1                             | -3.562  | -2.414 | 1.168  | 1                             | -3.375  | -2.638 | 1.058  |
| 1                             | -5.137  | 1.529  | -1.165 | 1                             | -4.782  | 1.474  | -1.084 |
| 1                             | -4.719  | -0.001 | -1.952 | 1                             | -4.433  | -0.030 | -1.949 |
| 1                             | -5.274  | -2.166 | -0.555 | 1                             | -5.081  | -2.243 | -0.639 |
| 1                             | -6.013  | -1.870 | 1.027  | 1                             | -5.799  | -1.979 | 0.958  |
| 1                             | -8.903  | 2.690  | -1.012 | 1                             | -8.504  | 2.767  | -0.904 |
| 1                             | -9.810  | -0.837 | 1.261  | 1                             | -9.555  | -0.811 | 1.222  |
| 1                             | -10.621 | 1.326  | 0.240  | 1                             | -10.278 | 1.422  | 0.289  |
| 8                             | 5.400   | 3.567  | 0.422  | 8                             | 0.332   | 2.225  | 0.181  |
| 1                             | 5.248   | 4.508  | 0.518  | 1                             | 1.284   | 2.120  | 0.333  |
| 1                             | 4.525   | 3.158  | 0.527  | 1                             | 0.152   | 3.134  | 0.430  |
| Buspirone                     |         |        |        | Buspirone                     |         |        |        |
| motif 4, Eint = -6.7 kcal/mol |         |        |        | motif 5, Eint = -6.9 kcal/mol |         |        |        |
| 8                             | -3.978  | -2.020 | 1.491  | 8                             | 3.975   | 2.030  | 1.439  |
| 8                             | -3.651  | 1.718  | -1.074 | 8                             | 3.812   | -1.823 | -0.968 |
| 7                             | -3.839  | -0.105 | 0.272  | 7                             | 3.920   | 0.065  | 0.296  |
| 7                             | 2.375   | -0.946 | 0.139  | 7                             | -2.343  | 0.461  | 0.208  |
| 7                             | 5.185   | -0.463 | 0.100  | 7                             | -5.109  | -0.228 | 0.185  |
| 7                             | 6.947   | 1.053  | 0.190  | 7                             | -6.708  | -1.895 | 0.342  |
| 7                             | 7.294   | -1.229 | -0.466 | 7                             | -7.315  | 0.342  | -0.278 |
| 6                             | -6.635  | -0.189 | -0.203 | 6                             | 6.697   | 0.285  | -0.241 |
| 6                             | -6.995  | 0.716  | 0.987  | 6                             | 7.131   | -0.549 | 0.976  |
| 6                             | -8.019  | -0.448 | -0.808 | 6                             | 8.052   | 0.597  | -0.885 |
| 6                             | -8.086  | 1.653  | 0.453  | 6                             | 8.262   | -1.445 | 0.456  |
| 6                             | -8.745  | 0.899  | -0.725 | 6                             | 8.856   | -0.702 | -0.764 |
| 6                             | -5.912  | -1.463 | 0.201  | 6                             | 5.911   | 1.532  | 0.127  |
| 6                             | -5.731  | 0.545  | -1.192 | 6                             | 5.817   | -0.537 | -1.181 |
| 6                             | -4.516  | -1.248 | 0.725  | 6                             | 4.539   | 1.260  | 0.690  |



|                               |        |        |        |                                |        |        |        |
|-------------------------------|--------|--------|--------|--------------------------------|--------|--------|--------|
| 6                             | -4.335 | 0.796  | -0.681 | 6                              | 4.449  | -0.846 | -0.630 |
| 6                             | -2.478 | 0.119  | 0.773  | 6                              | 2.583  | -0.216 | 0.833  |
| 6                             | -1.428 | -0.569 | -0.083 | 6                              | 1.480  | 0.370  | -0.031 |
| 6                             | -0.022 | -0.330 | 0.445  | 6                              | 0.098  | 0.051  | 0.519  |
| 6                             | 1.030  | -1.003 | -0.419 | 6                              | -1.006 | 0.632  | -0.348 |
| 6                             | 2.907  | 0.411  | 0.159  | 6                              | -2.767 | -0.933 | 0.201  |
| 6                             | 3.280  | -1.799 | -0.619 | 6                              | -3.310 | 1.247  | -0.545 |
| 6                             | 4.284  | 0.452  | 0.788  | 6                              | -4.131 | -1.088 | 0.839  |
| 6                             | 4.663  | -1.820 | -0.004 | 6                              | -4.695 | 1.162  | 0.065  |
| 6                             | 6.513  | -0.206 | -0.056 | 6                              | -6.416 | -0.602 | 0.085  |
| 6                             | 8.249  | 1.272  | 0.023  | 6                              | -7.970 | -2.258 | 0.162  |
| 6                             | 8.582  | -0.959 | -0.626 | 6                              | -8.568 | -0.073 | -0.453 |
| 6                             | 9.141  | 0.292  | -0.386 | 6                              | -8.968 | -1.386 | -0.259 |
| 1                             | -6.134 | 1.252  | 1.401  | 1                              | 6.310  | -1.114 | 1.429  |
| 1                             | -7.390 | 0.088  | 1.794  | 1                              | 7.506  | 0.133  | 1.748  |
| 1                             | -8.532 | -1.197 | -0.192 | 1                              | 8.533  | 1.398  | -0.311 |
| 1                             | -7.968 | -0.855 | -1.823 | 1                              | 7.959  | 0.958  | -1.914 |
| 1                             | -7.651 | 2.597  | 0.112  | 1                              | 7.873  | -2.424 | 0.159  |
| 1                             | -8.804 | 1.918  | 1.232  | 1                              | 9.008  | -1.640 | 1.229  |
| 1                             | -9.822 | 0.772  | -0.590 | 1                              | 9.925  | -0.509 | -0.654 |
| 1                             | -8.623 | 1.459  | -1.657 | 1                              | 8.750  | -1.306 | -1.670 |
| 1                             | -5.828 | -2.136 | -0.664 | 1                              | 5.771  | 2.163  | -0.762 |
| 1                             | -6.457 | -2.020 | 0.967  | 1                              | 6.438  | 2.151  | 0.858  |
| 1                             | -6.133 | 1.515  | -1.494 | 1                              | 6.268  | -1.495 | -1.453 |
| 1                             | -5.635 | -0.044 | -2.115 | 1                              | 5.670  | 0.007  | -2.123 |
| 1                             | -2.447 | -0.259 | 1.796  | 1                              | 2.547  | 0.206  | 1.839  |
| 1                             | -2.316 | 1.199  | 0.786  | 1                              | 2.485  | -1.301 | 0.895  |
| 1                             | -1.509 | -0.200 | -1.113 | 1                              | 1.577  | -0.025 | -1.050 |
| 1                             | -1.640 | -1.644 | -0.111 | 1                              | 1.616  | 1.457  | -0.097 |
| 1                             | 0.160  | 0.750  | 0.499  | 1                              | -0.009 | -1.037 | 0.599  |
| 1                             | 0.067  | -0.709 | 1.471  | 1                              | -0.005 | 0.446  | 1.537  |
| 1                             | 1.005  | -0.573 | -1.442 | 1                              | -0.942 | 0.203  | -1.370 |
| 1                             | 0.773  | -2.064 | -0.530 | 1                              | -0.838 | 1.710  | -0.461 |
| 1                             | 2.242  | 1.055  | 0.741  | 1                              | -2.050 | -1.535 | 0.764  |
| 1                             | 2.956  | 0.831  | -0.867 | 1                              | -2.793 | -1.332 | -0.834 |
| 1                             | 3.354  | -1.465 | -1.675 | 1                              | -3.358 | 0.913  | -1.602 |
| 1                             | 2.875  | -2.816 | -0.630 | 1                              | -2.987 | 2.293  | -0.551 |
| 1                             | 4.679  | 1.464  | 0.752  | 1                              | -4.477 | -2.117 | 0.774  |
| 1                             | 4.210  | 0.156  | 1.845  | 1                              | -4.067 | -0.819 | 1.905  |
| 1                             | 4.613  | -2.269 | 1.000  | 1                              | -4.692 | 1.636  | 1.059  |
| 1                             | 5.350  | -2.413 | -0.603 | 1                              | -5.405 | 1.700  | -0.560 |
| 1                             | 8.584  | 2.288  | 0.228  | 1                              | -8.195 | -3.304 | 0.370  |
| 1                             | 9.201  | -1.791 | -0.961 | 1                              | -9.279 | 0.697  | -0.752 |
| 1                             | 10.197 | 0.489  | -0.512 | 1                              | -9.992 | -1.704 | -0.403 |
| 8                             | 5.720  | 3.669  | 0.589  | 8                              | -7.499 | 3.225  | -0.637 |
| 1                             | 5.552  | 3.988  | -0.300 | 1                              | -7.371 | 2.275  | -0.461 |
| 1                             | 6.130  | 2.796  | 0.455  | 1                              | -7.458 | 3.633  | 0.229  |
| Buspirone                     |        |        |        | Aminophylline                  |        |        |        |
| motif 6, Eint = -7.4 kcal/mol |        |        |        | motif 1, Eint = -14.5 kcal/mol |        |        |        |
| 8                             | -3.477 | 2.023  | -0.761 | 8                              | -1.469 | -1.927 | -0.007 |
| 8                             | -3.081 | -2.325 | 0.467  | 8                              | 3.012  | -0.903 | 0.001  |
| 7                             | -3.313 | -0.172 | -0.225 | 7                              | 1.562  | 0.852  | 0.000  |
| 7                             | 2.904  | 0.623  | 0.076  | 7                              | 0.775  | -1.393 | -0.002 |
| 7                             | 5.707  | 0.175  | -0.099 | 7                              | -1.925 | 1.117  | -0.008 |
| 7                             | 7.442  | -1.189 | -0.805 | 7                              | -0.192 | 2.538  | -0.002 |
| 7                             | 7.829  | 0.636  | 0.712  | 6                              | 0.255  | 1.261  | -0.003 |
| 6                             | -6.093 | -0.287 | 0.328  | 6                              | -0.781 | 0.349  | -0.007 |
| 6                             | -6.487 | -0.806 | -1.066 | 6                              | -0.593 | -1.060 | -0.006 |
| 6                             | -7.457 | -0.239 | 1.023  | 6                              | 1.865  | -0.502 | 0.000  |
| 6                             | -7.551 | -1.878 | -0.799 | 6                              | 2.666  | 1.799  | 0.005  |
| 6                             | -8.179 | -1.512 | 0.567  | 6                              | 1.144  | -2.805 | 0.001  |
| 6                             | -5.397 | 1.063  | 0.297  | 6                              | -1.515 | 2.401  | -0.005 |
| 6                             | -5.152 | -1.266 | 1.027  | 1                              | -2.875 | 0.729  | -0.014 |
| 6                             | -4.007 | 1.036  | -0.275 | 1                              | 2.244  | 2.801  | 0.007  |
| 6                             | -3.779 | -1.336 | 0.413  | 1                              | 3.290  | 1.656  | -0.879 |
| 6                             | -1.960 | -0.210 | -0.798 | 1                              | 3.287  | 1.650  | 0.889  |
| 6                             | -0.895 | 0.174  | 0.216  | 1                              | 0.227  | -3.386 | 0.011  |
| 6                             | 0.502  | 0.128  | -0.384 | 1                              | 1.749  | -3.031 | 0.880  |
| 6                             | 1.569  | 0.475  | 0.640  | 1                              | 1.735  | -3.040 | -0.885 |
| 6                             | 3.433  | -0.641 | -0.424 | 1                              | -2.212 | 3.225  | -0.004 |
| 6                             | 3.819  | 1.161  | 1.075  | 8                              | -3.965 | -0.743 | 0.084  |
| 6                             | 4.802  | -0.451 | -1.047 | 1                              | -4.633 | -1.100 | -0.505 |
| 6                             | 5.194  | 1.402  | 0.489  | 1                              | -3.215 | -1.371 | 0.050  |
| 6                             | 7.038  | -0.132 | -0.068 |                                |        |        |        |
| 6                             | 8.730  | -1.497 | -0.719 |                                |        |        |        |
| 6                             | 9.107  | 0.286  | 0.764  |                                |        |        |        |
| 6                             | 9.636  | -0.792 | 0.065  |                                |        |        |        |
| 1                             | -5.638 | -1.181 | -1.646 |                                |        |        |        |
| 1                             | -6.915 | 0.026  | -1.637 |                                |        |        |        |
| 1                             | -7.993 | 0.652  | 0.674  |                                |        |        |        |
| 1                             | -7.374 | -0.151 | 2.111  |                                |        |        |        |
| 1                             | -7.096 | -2.872 | -0.760 |                                |        |        |        |
| 1                             | -8.291 | -1.918 | -1.601 |                                |        |        |        |
| 1                             | -9.259 | -1.364 | 0.502  |                                |        |        |        |

|                               |        |        |        |                               |        |        |        |
|-------------------------------|--------|--------|--------|-------------------------------|--------|--------|--------|
| 1                             | -8.028 | -2.320 | 1.288  |                               |        |        |        |
| 1                             | -5.309 | 1.469  | 1.315  |                               |        |        |        |
| 1                             | -5.965 | 1.812  | -0.262 |                               |        |        |        |
| 1                             | -5.540 | -2.288 | 1.047  |                               |        |        |        |
| 1                             | -5.021 | -0.970 | 2.077  |                               |        |        |        |
| 1                             | -1.951 | 0.477  | -1.645 |                               |        |        |        |
| 1                             | -1.797 | -1.227 | -1.159 |                               |        |        |        |
| 1                             | -0.957 | -0.508 | 1.073  |                               |        |        |        |
| 1                             | -1.107 | 1.181  | 0.594  |                               |        |        |        |
| 1                             | 0.678  | -0.873 | -0.797 |                               |        |        |        |
| 1                             | 0.576  | 0.826  | -1.226 |                               |        |        |        |
| 1                             | 1.561  | -0.279 | 1.455  |                               |        |        |        |
| 1                             | 1.311  | 1.432  | 1.111  |                               |        |        |        |
| 1                             | 2.757  | -1.041 | -1.183 |                               |        |        |        |
| 1                             | 3.498  | -1.391 | 0.390  |                               |        |        |        |
| 1                             | 3.907  | 0.477  | 1.944  |                               |        |        |        |
| 1                             | 3.412  | 2.106  | 1.447  |                               |        |        |        |
| 1                             | 5.225  | -1.405 | -1.355 |                               |        |        |        |
| 1                             | 4.710  | 0.184  | -1.942 |                               |        |        |        |
| 1                             | 5.132  | 2.183  | -0.285 |                               |        |        |        |
| 1                             | 5.892  | 1.741  | 1.252  |                               |        |        |        |
| 1                             | 9.053  | -2.352 | -1.313 |                               |        |        |        |
| 1                             | 9.743  | 0.907  | 1.395  |                               |        |        |        |
| 1                             | 10.683 | -1.058 | 0.118  |                               |        |        |        |
| 8                             | -5.358 | 4.132  | -0.554 |                               |        |        |        |
| 1                             | -5.183 | 4.934  | -1.050 |                               |        |        |        |
| 1                             | -4.583 | 3.569  | -0.712 |                               |        |        |        |
| Aminophylline                 |        |        |        | Aminophylline                 |        |        |        |
| motif 2, Eint = -6.5 kcal/mol |        |        |        | motif 3, Eint = -7.4 kcal/mol |        |        |        |
| 8                             | 1.884  | -1.311 | 0.002  | 8                             | -2.144 | 2.288  | 0.000  |
| 8                             | -0.106 | 2.843  | -0.004 | 8                             | 2.203  | 0.783  | 0.000  |
| 7                             | -1.488 | 1.028  | 0.004  | 7                             | 0.568  | -0.804 | 0.000  |
| 7                             | 0.878  | 0.765  | 0.004  | 7                             | 0.043  | 1.515  | 0.000  |
| 7                             | -0.972 | -2.424 | -0.001 | 7                             | -2.922 | -0.673 | 0.000  |
| 7                             | -2.741 | -1.056 | -0.001 | 7                             | -1.371 | -2.281 | 0.000  |
| 6                             | -1.590 | -0.336 | 0.001  | 6                             | -0.779 | -1.060 | 0.000  |
| 6                             | -0.474 | -1.140 | 0.001  | 6                             | -1.700 | -0.037 | 0.000  |
| 6                             | 0.855  | -0.640 | 0.003  | 6                             | -1.368 | 1.347  | 0.000  |
| 6                             | -0.234 | 1.637  | 0.000  | 6                             | 1.012  | 0.506  | 0.000  |
| 6                             | -2.690 | 1.848  | -0.003 | 6                             | 1.555  | -1.877 | 0.000  |
| 6                             | 2.205  | 1.381  | 0.004  | 6                             | 0.566  | 2.877  | 0.000  |
| 6                             | -2.322 | -2.312 | -0.002 | 6                             | -2.665 | -2.002 | 0.000  |
| 1                             | -0.419 | -3.268 | -0.001 | 1                             | -3.820 | -0.213 | 0.000  |
| 1                             | -3.247 | 1.695  | -0.929 | 1                             | 2.192  | -1.810 | 0.882  |
| 1                             | -2.383 | 2.887  | 0.079  | 1                             | 2.192  | -1.810 | -0.882 |
| 1                             | -3.330 | 1.573  | 0.837  | 1                             | 1.015  | -2.821 | 0.000  |
| 1                             | 2.765  | 1.064  | 0.883  | 1                             | -0.286 | 3.552  | 0.000  |
| 1                             | 2.075  | 2.458  | 0.007  | 1                             | 1.183  | 3.043  | -0.883 |
| 1                             | 2.763  | 1.069  | -0.880 | 1                             | 1.183  | 3.043  | 0.884  |
| 1                             | -2.970 | -3.177 | -0.004 | 1                             | -3.454 | -2.740 | 0.000  |
| 8                             | 4.669  | -0.625 | -0.005 | 8                             | 4.532  | -0.882 | 0.000  |
| 1                             | 3.750  | -0.936 | -0.003 | 1                             | 3.811  | -0.233 | 0.000  |
| 1                             | 5.190  | -1.429 | -0.006 | 1                             | 5.330  | -0.352 | -0.001 |
| Aminophylline                 |        |        |        | Aminophylline                 |        |        |        |
| motif 4, Eint = -7.1 kcal/mol |        |        |        | motif 5, Eint = -6.8 kcal/mol |        |        |        |
| 8                             | -0.447 | -2.785 | 0.001  | 8                             | 2.561  | 1.879  | -0.001 |
| 8                             | 2.035  | 1.104  | 0.003  | 8                             | 1.339  | -2.559 | -0.001 |
| 7                             | -0.221 | 1.317  | 0.001  | 7                             | -0.359 | -1.024 | 0.001  |
| 7                             | 0.803  | -0.830 | 0.002  | 7                             | 1.930  | -0.354 | 0.000  |
| 7                             | -2.884 | -0.939 | -0.002 | 7                             | -0.435 | 2.467  | 0.000  |
| 7                             | -2.659 | 1.284  | -0.001 | 7                             | -1.944 | 0.826  | 0.001  |
| 6                             | -1.440 | 0.689  | 0.000  | 6                             | -0.687 | 0.301  | 0.001  |
| 6                             | -1.531 | -0.683 | -0.001 | 6                             | 0.272  | 1.286  | 0.001  |
| 6                             | -0.413 | -1.566 | 0.000  | 6                             | 1.676  | 1.038  | 0.000  |
| 6                             | 0.940  | 0.560  | 0.002  | 6                             | 0.986  | -1.398 | 0.000  |
| 6                             | -0.102 | 2.767  | 0.001  | 6                             | -1.398 | -2.046 | 0.002  |
| 6                             | 2.055  | -1.584 | 0.003  | 6                             | 3.321  | -0.791 | -0.001 |
| 6                             | -3.505 | 0.265  | -0.002 | 6                             | -1.745 | 2.138  | 0.001  |
| 1                             | -3.305 | -1.856 | -0.002 | 1                             | -0.028 | 3.390  | 0.000  |
| 1                             | -1.108 | 3.182  | -0.001 | 1                             | -2.031 | -1.943 | 0.884  |
| 1                             | 0.444  | 3.101  | -0.881 | 1                             | -0.905 | -3.014 | 0.005  |
| 1                             | 0.439  | 3.101  | 0.887  | 1                             | -2.029 | -1.948 | -0.882 |
| 1                             | 1.797  | -2.639 | 0.004  | 1                             | 3.944  | 0.099  | 0.001  |
| 1                             | 2.647  | -1.338 | 0.884  | 1                             | 3.524  | -1.396 | -0.885 |
| 1                             | 2.647  | -1.341 | -0.880 | 1                             | 3.524  | -1.400 | 0.880  |
| 1                             | -4.580 | 0.357  | -0.003 | 1                             | -2.528 | 2.881  | 0.000  |
| 8                             | 4.729  | 0.122  | -0.006 | 8                             | -4.344 | -0.897 | -0.003 |
| 1                             | 5.340  | 0.860  | -0.004 | 1                             | -5.163 | -0.398 | -0.003 |
| 1                             | 3.853  | 0.536  | -0.003 | 1                             | -3.643 | -0.224 | -0.002 |
| Aminophylline                 |        |        |        | Atovaquone                    |        |        |        |
| motif 6, Eint = -6.3 kcal/mol |        |        |        | motif 1, Eint = -3.5 kcal/mol |        |        |        |
| 8                             | 1.887  | -2.441 | 0.009  | 17                            | -7.716 | -1.069 | 0.007  |
| 8                             | 2.225  | 2.150  | 0.005  | 8                             | 3.185  | -2.321 | -0.008 |
| 7                             | 0.113  | 1.270  | -0.008 | 8                             | 2.214  | 2.318  | 0.007  |

|                               |        |        |        |                               |        |        |        |
|-------------------------------|--------|--------|--------|-------------------------------|--------|--------|--------|
| 7                             | 2.040  | -0.127 | 0.008  | 8                             | 4.879  | 2.829  | 0.010  |
| 7                             | -1.140 | -1.989 | -0.017 | 6                             | 1.065  | -0.306 | 0.003  |
| 7                             | -2.003 | 0.066  | -0.029 | 6                             | -1.834 | 0.350  | 0.005  |
| 6                             | -0.646 | 0.132  | -0.016 | 6                             | 0.355  | 0.209  | -1.258 |
| 6                             | -0.074 | -1.117 | -0.009 | 6                             | 0.357  | 0.207  | 1.265  |
| 6                             | 1.331  | -1.355 | 0.003  | 6                             | -1.120 | -0.165 | -1.250 |
| 6                             | 1.505  | 1.172  | 0.001  | 6                             | -1.118 | -0.167 | 1.259  |
| 6                             | -0.520 | 2.578  | -0.014 | 6                             | 2.546  | -0.017 | 0.002  |
| 6                             | 3.498  | -0.185 | 0.020  | 6                             | -3.301 | 0.001  | 0.006  |
| 6                             | -2.262 | -1.237 | -0.028 | 6                             | 3.491  | -1.008 | -0.003 |
| 1                             | -1.072 | -2.996 | -0.014 | 6                             | 2.985  | 1.372  | 0.005  |
| 1                             | -1.098 | 2.717  | -0.930 | 6                             | -4.278 | 0.997  | 0.006  |
| 1                             | 0.267  | 3.326  | 0.043  | 6                             | -3.724 | -1.331 | 0.007  |
| 1                             | -1.191 | 2.674  | 0.842  | 6                             | 4.937  | -0.780 | -0.005 |
| 1                             | 3.782  | -1.234 | 0.022  | 6                             | 4.502  | 1.677  | 0.005  |
| 1                             | 3.888  | 0.317  | 0.906  | 6                             | 5.438  | 0.533  | -0.001 |
| 1                             | 3.902  | 0.317  | -0.860 | 6                             | -5.637 | 0.693  | 0.007  |
| 1                             | -3.259 | -1.653 | -0.035 | 6                             | -5.072 | -1.663 | 0.008  |
| 8                             | -4.854 | 0.338  | 0.095  | 6                             | 5.834  | -1.851 | -0.010 |
| 1                             | -3.946 | 0.672  | 0.030  | 6                             | -6.013 | -0.642 | 0.007  |
| 1                             | -5.399 | 1.022  | -0.296 | 6                             | 6.812  | 0.758  | -0.002 |
|                               |        |        |        | 6                             | 7.204  | -1.613 | -0.011 |
|                               |        |        |        | 6                             | 7.698  | -0.312 | -0.007 |
|                               |        |        |        | 1                             | 0.904  | -1.401 | 0.002  |
|                               |        |        |        | 1                             | -1.750 | 1.447  | 0.006  |
|                               |        |        |        | 1                             | 0.847  | -0.192 | -2.152 |
|                               |        |        |        | 1                             | 0.467  | 1.297  | -1.299 |
|                               |        |        |        | 1                             | 0.469  | 1.295  | 1.308  |
|                               |        |        |        | 1                             | 0.850  | -0.195 | 2.158  |
|                               |        |        |        | 1                             | -1.616 | 0.223  | -2.146 |
|                               |        |        |        | 1                             | -1.226 | -1.259 | -1.296 |
|                               |        |        |        | 1                             | -1.224 | -1.261 | 1.303  |
|                               |        |        |        | 1                             | -1.612 | 0.220  | 2.157  |
|                               |        |        |        | 1                             | -3.974 | 2.040  | 0.004  |
|                               |        |        |        | 1                             | -2.989 | -2.132 | 0.008  |
|                               |        |        |        | 1                             | -6.386 | 1.478  | 0.007  |
|                               |        |        |        | 1                             | -5.393 | -2.699 | 0.008  |
|                               |        |        |        | 1                             | 5.454  | -2.865 | -0.013 |
|                               |        |        |        | 1                             | 2.224  | -2.414 | -0.007 |
|                               |        |        |        | 1                             | 7.160  | 1.786  | 0.002  |
|                               |        |        |        | 1                             | 7.891  | -2.453 | -0.015 |
|                               |        |        |        | 1                             | 8.768  | -0.134 | -0.008 |
|                               |        |        |        | 8                             | -8.591 | 2.174  | -0.107 |
|                               |        |        |        | 1                             | -9.241 | 2.508  | 0.515  |
|                               |        |        |        | 1                             | -8.715 | 1.218  | -0.091 |
| Atovaquone                    |        |        |        | Atovaquone                    |        |        |        |
| motif 2, Eint = -3.6 kcal/mol |        |        |        | motif 3, Eint = -3.2 kcal/mol |        |        |        |
| 17                            | 7.833  | -0.190 | -0.007 | 17                            | -8.375 | 0.649  | 0.041  |
| 8                             | -2.891 | 2.353  | 0.000  | 8                             | 2.531  | 1.987  | 0.288  |
| 8                             | -2.401 | -2.362 | -0.001 | 8                             | 1.564  | -2.623 | -0.216 |
| 8                             | -5.104 | -2.596 | 0.005  | 8                             | 4.227  | -3.132 | -0.312 |
| 6                             | -0.988 | 0.131  | 0.006  | 6                             | 0.420  | -0.012 | 0.065  |
| 6                             | 1.818  | -0.849 | 0.005  | 6                             | -2.475 | -0.676 | -0.034 |
| 6                             | -0.337 | -0.449 | -1.258 | 6                             | -0.298 | -0.664 | 1.257  |
| 6                             | -0.340 | -0.460 | 1.267  | 6                             | -0.277 | -0.381 | -1.253 |
| 6                             | 1.171  | -0.245 | -1.247 | 6                             | -1.775 | -0.297 | 1.277  |
| 6                             | 1.168  | -0.255 | 1.261  | 6                             | -1.754 | -0.017 | -1.216 |
| 6                             | -2.492 | -0.004 | 0.003  | 6                             | 1.901  | -0.303 | 0.046  |
| 6                             | 3.316  | -0.681 | 0.006  | 6                             | -3.945 | -0.346 | -0.011 |
| 6                             | -3.330 | 1.079  | 0.001  | 6                             | 2.851  | 0.675  | 0.160  |
| 6                             | -3.071 | -1.341 | 0.001  | 6                             | 2.338  | -1.686 | -0.109 |
| 6                             | 4.164  | -1.789 | -0.013 | 6                             | -4.910 | -1.347 | -0.136 |
| 6                             | 3.900  | 0.589  | 0.022  | 6                             | -4.387 | 0.973  | 0.131  |
| 6                             | -4.792 | 1.000  | -0.002 | 6                             | 4.296  | 0.448  | 0.164  |
| 6                             | -4.611 | -1.489 | 0.002  | 6                             | 3.855  | -1.990 | -0.155 |
| 6                             | -5.424 | -0.255 | -0.002 | 6                             | 4.791  | -0.859 | 0.003  |
| 6                             | 5.547  | -1.647 | -0.016 | 6                             | -6.269 | -1.055 | -0.121 |
| 6                             | 5.279  | 0.762  | 0.020  | 6                             | -5.739 | 1.288  | 0.149  |
| 6                             | -5.575 | 2.157  | -0.006 | 6                             | 5.198  | 1.502  | 0.333  |
| 6                             | 6.086  | -0.369 | 0.000  | 6                             | -6.673 | 0.266  | 0.022  |
| 6                             | -6.814 | -0.338 | -0.004 | 6                             | 6.163  | -1.092 | 0.001  |
| 6                             | -6.962 | 2.061  | -0.008 | 6                             | 6.567  | 1.254  | 0.330  |
| 6                             | -7.586 | 0.816  | -0.008 | 6                             | 7.054  | -0.038 | 0.162  |
| 1                             | -0.714 | 1.203  | 0.011  | 1                             | 0.257  | 1.076  | 0.187  |
| 1                             | 1.602  | -1.927 | 0.001  | 1                             | -2.378 | -1.765 | -0.155 |
| 1                             | -0.779 | 0.012  | -2.149 | 1                             | 0.185  | -0.361 | 2.193  |
| 1                             | -0.570 | -1.518 | -1.309 | 1                             | -0.182 | -1.749 | 1.180  |
| 1                             | -0.573 | -1.529 | 1.308  | 1                             | -0.159 | -1.456 | -1.418 |
| 1                             | -0.784 | -0.007 | 2.160  | 1                             | 0.221  | 0.122  | -2.090 |
| 1                             | 1.620  | -0.680 | -2.146 | 1                             | -2.275 | -0.783 | 2.121  |
| 1                             | 1.402  | 0.830  | -1.283 | 1                             | -1.888 | 0.785  | 1.440  |
| 1                             | 1.398  | 0.820  | 1.306  | 1                             | -1.867 | 1.075  | -1.137 |
| 1                             | 1.615  | -0.697 | 2.157  | 1                             | -2.239 | -0.303 | -2.155 |
| 1                             | 3.734  | -2.787 | -0.026 | 1                             | -4.592 | -2.380 | -0.248 |

|                               |        |        |        |                               |        |        |        |
|-------------------------------|--------|--------|--------|-------------------------------|--------|--------|--------|
| 1                             | 3.268  | 1.473  | 0.036  | 1                             | -3.663 | 1.777  | 0.231  |
| 1                             | 6.197  | -2.513 | -0.032 | 1                             | -7.009 | -1.840 | -0.219 |
| 1                             | 5.720  | 1.753  | 0.034  | 1                             | -6.072 | 2.313  | 0.260  |
| 1                             | -5.093 | 3.127  | -0.006 | 1                             | 4.840  | 2.516  | 0.468  |
| 1                             | -1.925 | 2.348  | 0.001  | 1                             | 1.569  | 2.065  | 0.338  |
| 1                             | -7.265 | -1.325 | -0.004 | 1                             | 6.506  | -2.113 | -0.127 |
| 1                             | -7.560 | 2.966  | -0.011 | 1                             | 7.255  | 2.082  | 0.462  |
| 1                             | -8.668 | 0.749  | -0.010 | 1                             | 8.123  | -0.223 | 0.161  |
| 8                             | 7.567  | 3.160  | -0.073 | 8                             | 3.788  | 4.511  | -0.579 |
| 1                             | 7.985  | 2.291  | -0.088 | 1                             | 3.323  | 3.668  | -0.521 |
| 1                             | 8.096  | 3.666  | 0.547  | 1                             | 3.928  | 4.645  | -1.518 |
| Atovaquone                    |        |        |        | Atovaquone                    |        |        |        |
| motif 4, Eint = -8.8 kcal/mol |        |        |        | motif 5, Eint = -6.8 kcal/mol |        |        |        |
| 17                            | -8.188 | -0.707 | 0.000  | 17                            | -8.590 | -0.180 | -0.014 |
| 8                             | 2.686  | -2.495 | -0.002 | 8                             | 2.143  | -2.675 | -0.032 |
| 8                             | 1.905  | 2.181  | 0.002  | 8                             | 1.637  | 2.036  | 0.056  |
| 8                             | 4.567  | 2.578  | 0.004  | 8                             | 4.312  | 2.290  | -0.005 |
| 6                             | 0.639  | -0.419 | 0.002  | 6                             | 0.228  | -0.462 | -0.007 |
| 6                             | -2.230 | 0.331  | 0.000  | 6                             | -2.582 | 0.508  | 0.014  |
| 6                             | -0.055 | 0.103  | -1.266 | 6                             | -0.422 | 0.153  | -1.255 |
| 6                             | -0.055 | 0.106  | 1.267  | 6                             | -0.425 | 0.089  | 1.270  |
| 6                             | -1.542 | -0.225 | -1.252 | 6                             | -1.929 | -0.056 | -1.254 |
| 6                             | -1.542 | -0.222 | 1.254  | 6                             | -1.933 | -0.119 | 1.254  |
| 6                             | 2.130  | -0.172 | 0.001  | 6                             | 1.731  | -0.321 | -0.001 |
| 6                             | -3.712 | 0.064  | 0.000  | 6                             | -4.080 | 0.336  | 0.008  |
| 6                             | 3.042  | -1.199 | -0.001 | 6                             | 2.576  | -1.399 | -0.013 |
| 6                             | 2.626  | 1.190  | 0.002  | 6                             | 2.306  | 1.014  | 0.025  |
| 6                             | -4.625 | 1.120  | -0.002 | 6                             | -4.931 | 1.442  | 0.035  |
| 6                             | -4.221 | -1.239 | 0.002  | 6                             | -4.661 | -0.935 | -0.026 |
| 6                             | 4.496  | -1.028 | -0.001 | 6                             | 4.037  | -1.312 | -0.002 |
| 6                             | 4.152  | 1.440  | 0.002  | 6                             | 3.846  | 1.167  | 0.010  |
| 6                             | 5.046  | 0.265  | 0.001  | 6                             | 4.670  | -0.054 | 0.012  |
| 6                             | -5.997 | 0.897  | -0.002 | 6                             | -6.314 | 1.297  | 0.029  |
| 6                             | -5.588 | -1.485 | 0.002  | 6                             | -6.039 | -1.103 | -0.032 |
| 6                             | 5.351  | -2.132 | -0.002 | 6                             | 4.820  | -2.468 | -0.005 |
| 6                             | -6.467 | -0.409 | 0.000  | 6                             | -6.857 | 0.020  | -0.005 |
| 6                             | 6.427  | 0.439  | 0.001  | 6                             | 6.062  | 0.031  | 0.027  |
| 6                             | 6.730  | -1.946 | -0.002 | 6                             | 6.208  | -2.372 | 0.008  |
| 6                             | 7.271  | -0.663 | -0.001 | 6                             | 6.830  | -1.128 | 0.025  |
| 1                             | 0.451  | -1.509 | 0.003  | 1                             | -0.041 | -1.535 | -0.035 |
| 1                             | -2.080 | 1.417  | -0.001 | 1                             | -2.369 | 1.587  | 0.042  |
| 1                             | 0.426  | -0.326 | -2.152 | 1                             | 0.024  | -0.279 | -2.157 |
| 1                             | 0.078  | 1.187  | -1.329 | 1                             | -0.193 | 1.223  | -1.274 |
| 1                             | 0.077  | 1.190  | 1.327  | 1                             | -0.195 | 1.157  | 1.343  |
| 1                             | 0.425  | -0.320 | 2.155  | 1                             | 0.018  | -0.389 | 2.150  |
| 1                             | -2.022 | 0.176  | -2.151 | 1                             | -2.378 | 0.403  | -2.141 |
| 1                             | -1.684 | -1.316 | -1.291 | 1                             | -2.156 | -1.131 | -1.321 |
| 1                             | -1.684 | -1.313 | 1.295  | 1                             | -2.160 | -1.196 | 1.267  |
| 1                             | -2.023 | 0.181  | 2.151  | 1                             | -2.383 | 0.295  | 2.162  |
| 1                             | -4.250 | 2.140  | -0.003 | 1                             | -4.503 | 2.441  | 0.061  |
| 1                             | -3.538 | -2.084 | 0.004  | 1                             | -4.027 | -1.818 | -0.047 |
| 1                             | -6.697 | 1.725  | -0.003 | 1                             | -6.965 | 2.163  | 0.050  |
| 1                             | -5.973 | -2.498 | 0.004  | 1                             | -6.480 | -2.093 | -0.059 |
| 1                             | 4.933  | -3.131 | -0.003 | 1                             | 4.338  | -3.437 | -0.018 |
| 1                             | 1.721  | -2.552 | -0.002 | 1                             | 1.177  | -2.673 | -0.038 |
| 1                             | 6.813  | 1.453  | 0.002  | 1                             | 6.538  | 1.007  | 0.042  |
| 1                             | 7.385  | -2.811 | -0.003 | 1                             | 6.805  | -3.278 | 0.005  |
| 1                             | 8.347  | -0.526 | 0.000  | 1                             | 7.912  | -1.058 | 0.036  |
| 8                             | -0.703 | 3.329  | -0.008 | 8                             | 7.027  | 3.172  | -0.111 |
| 1                             | -0.631 | 4.285  | -0.005 | 1                             | 7.206  | 4.027  | 0.283  |
| 1                             | 0.216  | 3.020  | -0.005 | 1                             | 6.064  | 3.082  | -0.080 |
| Atovaquone                    |        |        |        | Methotrexate                  |        |        |        |
| motif 6, Eint = -7.7 kcal/mol |        |        |        | motif 1, Eint = -9.0 kcal/mol |        |        |        |
| 17                            | 8.371  | -0.448 | -0.002 | 8                             | -6.832 | -0.470 | 0.300  |
| 8                             | -2.439 | -2.688 | -0.005 | 8                             | -2.674 | -1.351 | 2.461  |
| 8                             | -1.781 | 2.000  | 0.007  | 8                             | -5.513 | -1.368 | -1.268 |
| 8                             | -4.462 | 2.333  | 0.007  | 8                             | -3.870 | 3.884  | -1.676 |
| 6                             | -0.455 | -0.538 | 0.000  | 8                             | -4.036 | 3.975  | 0.564  |
| 6                             | 2.378  | 0.358  | 0.002  | 7                             | 2.772  | -3.225 | -0.332 |
| 6                             | 0.213  | 0.021  | 1.266  | 7                             | -3.254 | -0.911 | 0.313  |
| 6                             | 0.212  | 0.027  | -1.262 | 7                             | 3.427  | -0.578 | -0.070 |
| 6                             | 1.714  | -0.228 | 1.254  | 7                             | 5.067  | 0.811  | -1.890 |
| 6                             | 1.714  | -0.222 | -1.253 | 7                             | 4.941  | 2.709  | -0.545 |
| 6                             | -1.953 | -0.350 | 0.001  | 7                             | 3.587  | 2.676  | 1.472  |
| 6                             | 3.872  | 0.155  | 0.001  | 7                             | 2.437  | 0.773  | 2.108  |
| 6                             | -2.833 | -1.402 | -0.001 | 7                             | 4.803  | 4.512  | 0.858  |
| 6                             | -2.487 | 0.998  | 0.004  | 6                             | -4.519 | -0.346 | 0.709  |
| 6                             | 4.744  | 1.245  | 0.003  | 6                             | -4.481 | 1.191  | 0.789  |
| 6                             | 4.428  | -1.127 | -0.002 | 6                             | 1.514  | -2.767 | 0.031  |
| 6                             | -4.291 | -1.271 | -0.001 | 6                             | -4.180 | 1.838  | -0.551 |
| 6                             | -4.018 | 1.204  | 0.005  | 6                             | 3.459  | -2.591 | -1.437 |
| 6                             | -4.877 | 0.007  | 0.002  | 6                             | -1.064 | -1.844 | 0.785  |
| 6                             | 6.124  | 1.073  | 0.002  | 6                             | -2.379 | -1.359 | 1.270  |
| 6                             | 5.803  | -1.322 | -0.002 | 6                             | 0.706  | -2.037 | -0.864 |

|                                |        |        |        |                                |        |        |        |
|--------------------------------|--------|--------|--------|--------------------------------|--------|--------|--------|
| 6                              | -5.116 | -2.397 | -0.004 | 6                              | 0.992  | -3.019 | 1.316  |
| 6                              | 6.642  | -0.214 | -0.001 | 6                              | -5.631 | -0.804 | -0.202 |
| 6                              | -6.263 | 0.144  | 0.002  | 6                              | -0.551 | -1.594 | -0.494 |
| 6                              | -6.500 | -2.248 | -0.004 | 6                              | -0.262 | -2.560 | 1.676  |
| 6                              | -7.077 | -0.982 | -0.001 | 6                              | 3.873  | -1.158 | -1.170 |
| 1                              | -0.221 | -1.619 | -0.002 | 6                              | 3.634  | -3.751 | 0.709  |
| 1                              | 2.188  | 1.441  | 0.005  | 6                              | -4.028 | 3.327  | -0.452 |
| 1                              | -0.243 | -0.427 | 2.155  | 6                              | 4.694  | -0.438 | -2.068 |
| 1                              | 0.014  | 1.096  | 1.319  | 6                              | 3.776  | 0.700  | 0.122  |
| 1                              | 0.014  | 1.102  | -1.310 | 6                              | 4.602  | 1.426  | -0.769 |
| 1                              | -0.244 | -0.417 | -2.154 | 6                              | 3.261  | 1.415  | 1.259  |
| 1                              | 2.175  | 0.194  | 2.154  | 6                              | 4.430  | 3.238  | 0.563  |
| 1                              | 1.914  | -1.309 | 1.290  | 1                              | -4.730 | -0.725 | 1.715  |
| 1                              | 1.914  | -1.303 | -1.294 | 1                              | -3.712 | 1.462  | 1.517  |
| 1                              | 2.174  | 0.205  | -2.150 | 1                              | -5.430 | 1.560  | 1.188  |
| 1                              | 4.336  | 2.252  | 0.005  | 1                              | -4.953 | 1.625  | -1.300 |
| 1                              | 3.777  | -1.998 | -0.003 | 1                              | -3.256 | 1.438  | -0.988 |
| 1                              | 6.791  | 1.927  | 0.004  | 1                              | -3.031 | -0.984 | -0.674 |
| 1                              | 6.225  | -2.321 | -0.005 | 1                              | 4.342  | -3.194 | -1.676 |
| 1                              | -4.671 | -3.384 | -0.006 | 1                              | 2.837  | -2.635 | -2.339 |
| 1                              | -1.473 | -2.718 | -0.005 | 1                              | 1.073  | -1.783 | -1.851 |
| 1                              | -6.678 | 1.146  | 0.004  | 1                              | 1.578  | -3.563 | 2.046  |
| 1                              | -7.131 | -3.131 | -0.006 | 1                              | -1.122 | -1.017 | -1.215 |
| 1                              | -8.156 | -0.874 | -0.001 | 1                              | -0.647 | -2.742 | 2.675  |
| 8                              | -2.675 | 4.805  | -0.014 | 1                              | 4.578  | -4.063 | 0.262  |
| 1                              | -2.363 | 3.889  | -0.003 | 1                              | 3.184  | -4.631 | 1.176  |
| 1                              | -3.627 | 4.684  | -0.009 | 1                              | 3.849  | -3.011 | 1.493  |
|                                |        |        |        | 1                              | 5.061  | -0.930 | -2.972 |
|                                |        |        |        | 1                              | -7.498 | -0.762 | -0.338 |
|                                |        |        |        | 1                              | -3.765 | 4.835  | -1.535 |
|                                |        |        |        | 1                              | 1.957  | 1.305  | 2.815  |
|                                |        |        |        | 1                              | 2.080  | -0.132 | 1.839  |
|                                |        |        |        | 1                              | 4.261  | 5.007  | 1.546  |
|                                |        |        |        | 1                              | 5.245  | 5.040  | 0.124  |
|                                |        |        |        | 8                              | -3.149 | -0.909 | -2.686 |
|                                |        |        |        | 1                              | -2.808 | -1.541 | -3.322 |
|                                |        |        |        | 1                              | -4.044 | -1.219 | -2.476 |
| Methotrexate                   |        |        |        | Methotrexate                   |        |        |        |
| motif 2, Eint = -11.8 kcal/mol |        |        |        | motif 3, Eint = -13.5 kcal/mol |        |        |        |
| 8                              | 6.553  | -0.423 | 0.370  | 8                              | 5.996  | -0.930 | 0.850  |
| 8                              | 2.523  | -1.031 | -2.504 | 8                              | 2.010  | -2.141 | -2.049 |
| 8                              | 4.877  | -1.308 | 1.586  | 8                              | 4.370  | -1.766 | 2.160  |
| 8                              | 3.691  | 4.173  | 0.801  | 8                              | 1.784  | 2.941  | 0.740  |
| 8                              | 4.232  | 3.837  | -1.355 | 8                              | 2.938  | 2.788  | -1.187 |
| 7                              | -2.956 | -3.267 | -0.041 | 7                              | -3.781 | -2.441 | 0.328  |
| 7                              | 3.061  | -0.868 | -0.310 | 7                              | 2.673  | -2.041 | 0.113  |
| 7                              | -3.604 | -0.611 | 0.112  | 7                              | -2.828 | 0.092  | -0.236 |
| 7                              | -5.243 | 0.482  | 2.125  | 7                              | -3.331 | 2.334  | 1.385  |
| 7                              | -5.113 | 2.565  | 1.090  | 7                              | -1.728 | 3.544  | 0.208  |
| 7                              | -3.758 | 2.843  | -0.907 | 7                              | -0.446 | 2.461  | -1.539 |
| 7                              | -2.611 | 1.060  | -1.829 | 7                              | -0.830 | 0.264  | -2.135 |
| 7                              | -4.971 | 4.564  | -0.015 | 7                              | 0.024  | 4.598  | -0.852 |
| 6                              | 4.412  | -0.450 | -0.618 | 6                              | 3.915  | -1.363 | -0.179 |
| 6                              | 4.494  | 1.034  | -0.996 | 6                              | 3.698  | 0.086  | -0.657 |
| 6                              | -1.698 | -2.762 | -0.329 | 6                              | -2.415 | -2.616 | 0.144  |
| 6                              | 4.072  | 1.945  | 0.140  | 6                              | 2.823  | 0.880  | 0.295  |
| 6                              | -3.642 | -2.812 | 1.150  | 6                              | -4.211 | -1.342 | 1.176  |
| 6                              | 0.882  | -1.738 | -0.933 | 6                              | 0.362  | -2.565 | -0.394 |
| 6                              | 2.204  | -1.198 | -1.332 | 6                              | 1.736  | -2.260 | -0.856 |
| 6                              | -0.889 | -2.178 | 0.668  | 6                              | -1.494 | -2.181 | 1.116  |
| 6                              | -1.175 | -2.815 | -1.638 | 6                              | -1.897 | -3.158 | -1.050 |
| 6                              | 5.290  | -0.782 | 0.566  | 6                              | 4.754  | -1.398 | 1.077  |
| 6                              | 0.367  | -1.685 | 0.367  | 6                              | -0.141 | -2.143 | 0.843  |
| 6                              | 0.081  | -2.310 | -1.923 | 6                              | -0.539 | -3.112 | -1.311 |
| 6                              | -4.052 | -1.354 | 1.109  | 6                              | -3.644 | 0.014  | 0.799  |
| 6                              | -3.818 | -3.629 | -1.150 | 6                              | -4.658 | -2.742 | -0.787 |
| 6                              | 4.020  | 3.391  | -0.256 | 6                              | 2.555  | 2.283  | -0.164 |
| 6                              | -4.873 | -0.780 | 2.108  | 6                              | -3.895 | 1.160  | 1.588  |
| 6                              | -3.950 | 0.682  | 0.121  | 6                              | -2.203 | 1.258  | -0.430 |
| 6                              | -4.776 | 1.263  | 1.113  | 6                              | -2.425 | 2.397  | 0.375  |
| 6                              | -3.434 | 1.564  | -0.892 | 6                              | -1.140 | 1.342  | -1.397 |
| 6                              | -4.600 | 3.259  | 0.078  | 6                              | -0.798 | 3.488  | -0.732 |
| 1                              | 4.778  | -1.027 | -1.479 | 1                              | 4.455  | -1.899 | -0.968 |
| 1                              | 3.850  | 1.187  | -1.866 | 1                              | 3.229  | 0.045  | -1.643 |
| 1                              | 5.512  | 1.267  | -1.315 | 1                              | 4.668  | 0.570  | -0.792 |
| 1                              | 4.741  | 1.862  | 1.006  | 1                              | 3.238  | 0.926  | 1.310  |
| 1                              | 3.081  | 1.666  | 0.518  | 1                              | 1.845  | 0.395  | 0.420  |
| 1                              | 2.934  | -1.273 | 0.608  | 1                              | 2.460  | -2.181 | 1.091  |
| 1                              | -4.525 | -3.443 | 1.292  | 1                              | -5.305 | -1.318 | 1.162  |
|                                |        |        |        | 1                              | -3.947 | -1.545 | 2.222  |
|                                |        |        |        | 1                              | -1.844 | -1.770 | 2.055  |
|                                |        |        |        | 1                              | -2.562 | -3.547 | -1.810 |
|                                |        |        |        | 1                              | 0.510  | -1.691 | 1.587  |
|                                |        |        |        | 1                              | -0.157 | -3.447 | -2.270 |

|                                |        |        |        |                                |        |        |        |
|--------------------------------|--------|--------|--------|--------------------------------|--------|--------|--------|
| 1                              | -3.020 | -2.997 | 2.034  | 1                              | -5.692 | -2.600 | -0.473 |
| 1                              | -1.255 | -2.079 | 1.682  | 1                              | -4.549 | -3.785 | -1.090 |
| 1                              | -1.760 | -3.243 | -2.442 | 1                              | -4.468 | -2.104 | -1.663 |
| 1                              | 0.933  | -1.215 | 1.166  | 1                              | -4.596 | 1.097  | 2.423  |
| 1                              | 0.468  | -2.342 | -2.936 | 1                              | 6.466  | -0.958 | 1.695  |
| 1                              | -4.763 | -4.002 | -0.755 | 1                              | 1.470  | 3.768  | 0.318  |
| 1                              | -3.370 | -4.429 | -1.743 | 1                              | 0.041  | 0.259  | -2.644 |
| 1                              | -4.031 | -2.779 | -1.814 | 1                              | -1.228 | -0.627 | -1.867 |
| 1                              | -5.241 | -1.406 | 2.924  | 1                              | 0.496  | 4.667  | -1.744 |
| 1                              | 7.070  | -0.665 | 1.177  | 1                              | -0.397 | 5.457  | -0.525 |
| 1                              | 3.673  | 5.083  | 0.473  | 8                              | -0.146 | 1.211  | 2.134  |
| 1                              | -2.136 | 1.692  | -2.452 | 1                              | 0.467  | 1.870  | 1.777  |
| 1                              | -2.260 | 0.121  | -1.708 | 1                              | -0.796 | 1.743  | 2.601  |
| 1                              | -4.429 | 5.159  | -0.619 |                                |        |        |        |
| 1                              | -5.414 | 4.973  | 0.791  |                                |        |        |        |
| 8                              | 7.345  | -1.228 | 2.826  |                                |        |        |        |
| 1                              | 6.421  | -1.524 | 2.856  |                                |        |        |        |
| 1                              | 7.876  | -1.971 | 3.121  |                                |        |        |        |
| Methotrexate                   |        |        |        | Methotrexate                   |        |        |        |
| motif 4, Eint = -11.5 kcal/mol |        |        |        | motif 5, Eint = -11.6 kcal/mol |        |        |        |
| 8                              | -6.428 | -1.818 | -1.086 | 8                              | 7.082  | -0.017 | 1.164  |
| 8                              | -2.602 | -1.844 | 2.109  | 8                              | 3.439  | -1.243 | -2.014 |
| 8                              | -4.539 | -2.328 | -2.194 | 8                              | 5.352  | -0.878 | 2.313  |
| 8                              | -4.417 | 3.222  | -1.111 | 8                              | 3.857  | 4.349  | 0.760  |
| 8                              | -5.000 | 2.672  | 0.994  | 8                              | 4.677  | 3.827  | -1.268 |
| 7                              | 3.359  | -3.062 | 0.092  | 7                              | -2.105 | -3.666 | 0.099  |
| 7                              | -2.972 | -1.684 | -0.119 | 7                              | 3.719  | -0.819 | 0.192  |
| 7                              | 3.592  | -0.335 | -0.010 | 7                              | -2.956 | -1.068 | -0.060 |
| 7                              | 5.201  | 1.023  | -1.882 | 7                              | -4.917 | 0.034  | 1.633  |
| 7                              | 4.666  | 3.048  | -0.863 | 7                              | -4.827 | 2.022  | 0.426  |
| 7                              | 3.129  | 3.090  | 1.017  | 7                              | -3.271 | 2.257  | -1.423 |
| 7                              | 2.203  | 1.140  | 1.848  | 7                              | -1.889 | 0.511  | -2.041 |
| 7                              | 4.124  | 4.989  | 0.222  | 7                              | -4.664 | 3.955  | -0.790 |
| 6                              | -4.395 | -1.519 | 0.079  | 6                              | 5.062  | -0.326 | -0.021 |
| 6                              | -4.766 | -0.090 | 0.496  | 6                              | 5.080  | 1.110  | -0.560 |
| 6                              | 2.017  | -2.773 | 0.279  | 6                              | -0.863 | -3.089 | -0.111 |
| 6                              | -4.419 | 0.934  | -0.566 | 6                              | 4.466  | 2.102  | 0.410  |
| 6                              | 4.053  | -2.489 | -1.043 | 6                              | -2.943 | -3.168 | 1.169  |
| 6                              | -0.737 | -2.202 | 0.677  | 6                              | 1.688  | -1.921 | -0.554 |
| 6                              | -2.159 | -1.907 | 0.967  | 6                              | 3.004  | -1.318 | -0.871 |
| 6                              | 1.207  | -2.302 | -0.774 | 6                              | -0.209 | -2.353 | 0.898  |
| 6                              | 1.407  | -2.943 | 1.539  | 6                              | -0.202 | -3.219 | -1.350 |
| 6                              | -5.091 | -1.940 | -1.192 | 6                              | 5.814  | -0.454 | 1.281  |
| 6                              | -0.133 | -2.029 | -0.575 | 6                              | 1.034  | -1.791 | 0.677  |
| 6                              | 0.066  | -2.659 | 1.724  | 6                              | 1.038  | -2.643 | -1.558 |
| 6                              | 4.228  | -0.987 | -0.967 | 6                              | -3.463 | -1.763 | 0.944  |
| 6                              | 4.179  | -3.299 | 1.264  | 6                              | -2.817 | -4.194 | -1.049 |
| 6                              | -4.648 | 2.350  | -0.126 | 6                              | 4.363  | 3.487  | -0.156 |
| 6                              | 5.030  | -0.282 | -1.894 | 6                              | -4.446 | -1.187 | 1.779  |
| 6                              | 3.734  | 0.996  | 0.009  | 6                              | -3.403 | 0.182  | -0.215 |
| 6                              | 4.538  | 1.710  | -0.912 | 6                              | -4.390 | 0.764  | 0.614  |
| 6                              | 3.010  | 1.777  | 0.977  | 6                              | -2.850 | 1.020  | -1.249 |
| 6                              | 3.971  | 3.642  | 0.102  | 6                              | -4.251 | 2.690  | -0.582 |
| 1                              | -4.727 | -2.190 | 0.884  | 1                              | 5.565  | -0.960 | -0.766 |
| 1                              | -4.233 | 0.129  | 1.424  | 1                              | 4.530  | 1.113  | -1.504 |
| 1                              | -5.833 | -0.051 | 0.733  | 1                              | 6.108  | 1.393  | -0.798 |
| 1                              | -4.985 | 0.779  | -1.493 | 1                              | 5.031  | 2.166  | 1.349  |
| 1                              | -3.366 | 0.847  | -0.861 | 1                              | 3.459  | 1.785  | 0.707  |
| 1                              | -2.699 | -2.021 | -1.033 | 1                              | 3.519  | -1.137 | 1.132  |
| 1                              | 5.032  | -2.975 | -1.118 | 1                              | -3.783 | -3.860 | 1.290  |
| 1                              | 3.535  | -2.757 | -1.971 | 1                              | -2.401 | -3.217 | 2.121  |
| 1                              | 1.633  | -2.117 | -1.752 | 1                              | -0.687 | -2.192 | 1.856  |
| 1                              | 1.988  | -3.289 | 2.385  | 1                              | -0.667 | -3.763 | -2.162 |
| 1                              | -0.702 | -1.638 | -1.414 | 1                              | 1.477  | -1.207 | 1.478  |
| 1                              | -0.392 | -2.782 | 2.700  | 1                              | 1.533  | -2.737 | -2.519 |
| 1                              | 5.201  | -3.503 | 0.944  | 1                              | -3.770 | -4.605 | -0.715 |
| 1                              | 3.826  | -4.175 | 1.814  | 1                              | -2.254 | -5.006 | -1.515 |
| 1                              | 4.195  | -2.439 | 1.949  | 1                              | -3.018 | -3.427 | -1.810 |
| 1                              | 5.556  | -0.833 | -2.677 | 1                              | -4.864 | -1.773 | 2.601  |
| 1                              | -6.803 | -2.106 | -1.930 | 1                              | 7.499  | -0.131 | 2.029  |
| 1                              | -4.571 | 4.129  | -0.758 | 1                              | 3.813  | 5.214  | 0.329  |
| 1                              | 1.586  | 1.685  | 2.426  | 1                              | -1.402 | 1.123  | -2.674 |
| 1                              | 2.010  | 0.161  | 1.697  | 1                              | -1.486 | -0.382 | -1.799 |
| 1                              | 3.445  | 5.485  | 0.775  | 1                              | -4.306 | 4.448  | -1.589 |
|                                |        |        |        | 1                              | -5.440 | 4.320  | -0.245 |
|                                |        |        |        | 8                              | -6.802 | 3.894  | 1.138  |
|                                |        |        |        | 1                              | -6.274 | 3.071  | 1.171  |
|                                |        |        |        | 1                              | -6.920 | 4.156  | 2.053  |

|                               |        |        |        |                               |        |        |        |
|-------------------------------|--------|--------|--------|-------------------------------|--------|--------|--------|
| 1                             | 4.557  | 5.469  | -0.548 |                               |        |        |        |
| 8                             | -4.909 | 5.373  | 0.496  |                               |        |        |        |
| 1                             | -5.099 | 4.621  | 1.082  |                               |        |        |        |
| 1                             | -5.665 | 5.960  | 0.564  |                               |        |        |        |
| Methotrexate                  |        |        |        | Anileridine                   |        |        |        |
| motif 6, Eint = -9.3 kcal/mol |        |        |        | motif 1, Eint = -7.6 kcal/mol |        |        |        |
| 8                             | -6.975 | -0.556 | -0.745 | 8                             | -2.484 | 2.030  | -0.127 |
| 8                             | -3.020 | -1.038 | 2.246  | 8                             | -2.357 | 1.013  | 1.861  |
| 8                             | -5.321 | -1.591 | -1.863 | 7                             | 0.810  | -0.757 | -0.246 |
| 8                             | -3.949 | 3.869  | -1.583 | 7                             | 8.580  | 0.135  | 0.550  |
| 8                             | -4.364 | 3.746  | 0.623  | 6                             | -2.111 | -0.320 | -0.176 |
| 7                             | 2.458  | -3.596 | 0.122  | 6                             | -1.238 | -0.042 | -1.406 |
| 7                             | -3.506 | -1.059 | 0.034  | 6                             | -1.391 | -1.389 | 0.663  |
| 7                             | 3.133  | -0.958 | -0.140 | 6                             | 0.186  | 0.312  | -1.012 |
| 7                             | 4.870  | 0.023  | -2.129 | 6                             | 0.043  | -1.006 | 0.971  |
| 7                             | 4.705  | 2.157  | -1.210 | 6                             | -3.528 | -0.783 | -0.529 |
| 7                             | 3.261  | 2.541  | 0.706  | 6                             | 2.197  | -0.460 | 0.084  |
| 7                             | 2.080  | 0.798  | 1.676  | 6                             | -2.307 | 0.954  | 0.649  |
| 7                             | 4.470  | 4.227  | -0.269 | 6                             | 3.133  | -0.445 | -1.123 |
| 6                             | -4.844 | -0.565 | 0.272  | 6                             | -4.012 | -0.768 | -1.838 |
| 6                             | -4.871 | 0.952  | 0.504  | 6                             | -4.378 | -1.222 | 0.493  |
| 6                             | 1.200  | -3.055 | 0.335  | 6                             | 4.568  | -0.292 | -0.707 |
| 6                             | -4.397 | 1.730  | -0.709 | 6                             | -5.305 | -1.198 | -2.123 |
| 6                             | 3.198  | -3.208 | -1.061 | 6                             | -5.670 | -1.647 | 0.207  |
| 6                             | -1.369 | -1.931 | 0.786  | 6                             | -6.139 | -1.639 | -1.103 |
| 6                             | -2.681 | -1.322 | 1.103  | 6                             | -2.763 | 3.268  | 0.564  |
| 6                             | 0.434  | -2.530 | -0.726 | 6                             | 5.139  | 0.968  | -0.517 |
| 6                             | 0.637  | -3.006 | 1.627  | 6                             | 5.366  | -1.406 | -0.436 |
| 6                             | -5.705 | -0.976 | -0.897 | 6                             | -2.937 | 4.338  | -0.477 |
| 6                             | -0.817 | -1.987 | -0.500 | 6                             | 6.449  | 1.116  | -0.082 |
| 6                             | -0.612 | -2.451 | 1.838  | 6                             | 6.677  | -1.274 | -0.002 |
| 6                             | 3.619  | -1.753 | -1.075 | 6                             | 7.241  | -0.006 | 0.183  |
| 6                             | 3.272  | -3.909 | 1.281  | 1                             | -1.659 | 0.762  | -2.014 |
| 6                             | -4.248 | 3.199  | -0.444 | 1                             | -1.219 | -0.949 | -2.021 |
| 6                             | 4.490  | -1.235 | -2.062 | 1                             | -1.924 | -1.588 | 1.594  |
| 6                             | 3.487  | 0.331  | -0.201 | 1                             | -1.402 | -2.318 | 0.083  |
| 6                             | 4.360  | 0.859  | -1.182 | 1                             | 0.192  | 1.265  | -0.436 |
| 6                             | 2.935  | 1.262  | 0.746  | 1                             | 0.774  | 0.495  | -1.915 |
| 6                             | 4.151  | 2.917  | -0.268 | 1                             | 0.531  | -1.815 | 1.525  |
| 1                             | -5.249 | -1.041 | 1.176  | 1                             | 0.058  | -0.118 | 1.637  |
| 1                             | -4.231 | 1.164  | 1.364  | 1                             | 2.286  | 0.503  | 0.630  |
| 1                             | -5.882 | 1.256  | 0.784  | 1                             | 2.541  | -1.233 | 0.782  |
| 1                             | -5.067 | 1.608  | -1.569 | 1                             | 2.861  | 0.371  | -1.801 |
| 1                             | -3.424 | 1.356  | -1.052 | 1                             | 2.991  | -1.377 | -1.682 |
| 1                             | -3.376 | -1.554 | -0.839 | 1                             | -3.381 | -0.425 | -2.650 |
| 1                             | 4.079  | -3.853 | -1.134 | 1                             | -4.031 | -1.235 | 1.523  |
| 1                             | 2.611  | -3.433 | -1.960 | 1                             | -5.660 | -1.185 | -3.149 |
| 1                             | 0.830  | -2.515 | -1.733 | 1                             | -6.311 | -1.987 | 1.014  |
| 1                             | 1.188  | -3.389 | 2.477  | 1                             | -7.147 | -1.974 | -1.326 |
| 1                             | -1.350 | -1.565 | -1.347 | 1                             | -1.934 | 3.477  | 1.248  |
| 1                             | -1.028 | -2.401 | 2.839  | 1                             | -3.659 | 3.127  | 1.177  |
| 1                             | 4.220  | -4.328 | 0.945  | 1                             | 4.544  | 1.856  | -0.717 |
| 1                             | 2.783  | -4.660 | 1.906  | 1                             | 4.951  | -2.402 | -0.572 |
| 1                             | 3.483  | -3.024 | 1.900  | 1                             | -3.764 | 4.103  | -1.150 |
| 1                             | 4.893  | -1.904 | -2.826 | 1                             | -2.032 | 4.457  | -1.077 |
| 1                             | -7.465 | -0.855 | -1.525 | 1                             | -3.152 | 5.294  | 0.004  |
| 1                             | -3.857 | 4.801  | -1.338 | 1                             | 6.870  | 2.110  | 0.047  |
| 1                             | 1.580  | 1.443  | 2.264  | 1                             | 7.279  | -2.158 | 0.189  |
| 1                             | 1.749  | -0.153 | 1.589  | 1                             | 8.955  | -0.648 | 1.067  |
| 1                             | 4.154  | 4.828  | 0.484  | 1                             | 8.797  | 1.006  | 1.012  |
| 1                             | 5.181  | 4.531  | -0.911 | 8                             | -2.866 | -1.086 | 3.688  |
| 8                             | 3.052  | 4.990  | 2.158  | 1                             | -2.625 | -0.281 | 3.204  |
| 1                             | 2.189  | 5.403  | 2.225  | 1                             | -3.111 | -0.781 | 4.564  |
| 1                             | 2.880  | 4.075  | 1.866  |                               |        |        |        |
| Anileridine                   |        |        |        | Anileridine                   |        |        |        |
| motif 2, Eint = -7.0 kcal/mol |        |        |        | motif 3, Eint = -9.1 kcal/mol |        |        |        |
| 8                             | -2.551 | 1.504  | -0.911 | 8                             | -2.721 | 2.072  | -0.351 |
| 8                             | -2.402 | 1.473  | 1.333  | 8                             | -2.439 | 1.643  | 1.837  |
| 7                             | 0.829  | -0.936 | 0.208  | 7                             | 0.645  | -0.612 | 0.206  |
| 7                             | 8.561  | 0.476  | 0.373  | 7                             | 8.429  | 0.424  | 0.512  |
| 6                             | -2.103 | -0.603 | 0.103  | 6                             | -2.281 | -0.192 | 0.241  |
| 6                             | -1.234 | -0.896 | -1.124 | 6                             | -1.451 | -0.277 | -1.043 |
| 6                             | -1.354 | -1.129 | 1.339  | 6                             | -1.524 | -0.963 | 1.336  |
| 6                             | 0.175  | -0.354 | -0.957 | 6                             | -0.022 | 0.190  | -0.824 |
|                               |        |        |        | 6                             | -0.084 | -0.500 | 1.472  |

|                               |        |        |        |                               |        |        |        |
|-------------------------------|--------|--------|--------|-------------------------------|--------|--------|--------|
| 6                             | 0.071  | -0.609 | 1.411  | 6                             | -3.694 | -0.758 | 0.087  |
| 6                             | -3.497 | -1.230 | 0.022  | 6                             | 2.040  | -0.215 | 0.396  |
| 6                             | 2.207  | -0.485 | 0.344  | 6                             | -2.465 | 1.261  | 0.691  |
| 6                             | -2.346 | 0.901  | 0.262  | 6                             | 2.930  | -0.464 | -0.820 |
| 6                             | 3.144  | -1.015 | -0.740 | 6                             | -4.161 | -1.295 | -1.113 |
| 6                             | -3.933 | -1.949 | -1.091 | 6                             | -4.557 | -0.741 | 1.188  |
| 6                             | -4.378 | -1.077 | 1.099  | 6                             | 4.378  | -0.234 | -0.490 |
| 6                             | 4.572  | -0.634 | -0.468 | 6                             | -5.450 | -1.814 | -1.205 |
| 6                             | -5.204 | -2.515 | -1.120 | 6                             | -5.844 | -1.255 | 1.096  |
| 6                             | -5.648 | -1.637 | 1.070  | 6                             | -6.295 | -1.798 | -0.103 |
| 6                             | -6.066 | -2.364 | -0.041 | 6                             | -2.995 | 3.449  | -0.013 |
| 6                             | -2.866 | 2.920  | -0.856 | 6                             | 4.955  | 1.033  | -0.595 |
| 6                             | 5.099  | 0.577  | -0.921 | 6                             | 5.184  | -1.269 | -0.012 |
| 6                             | 5.405  | -1.450 | 0.298  | 6                             | -3.260 | 4.186  | -1.296 |
| 6                             | -3.068 | 3.392  | -2.267 | 6                             | 6.278  | 1.262  | -0.246 |
| 6                             | 6.400  | 0.960  | -0.629 | 6                             | 6.509  | -1.056 | 0.340  |
| 6                             | 6.710  | -1.083 | 0.598  | 6                             | 7.078  | 0.218  | 0.229  |
| 6                             | 7.229  | 0.133  | 0.138  | 1                             | -1.909 | 0.311  | -1.841 |
| 1                             | -1.685 | -0.483 | -2.029 | 1                             | -1.421 | -1.321 | -1.374 |
| 1                             | -1.174 | -1.983 | -1.249 | 1                             | -2.031 | -0.849 | 2.297  |
| 1                             | -1.888 | -0.851 | 2.250  | 1                             | -1.550 | -2.027 | 1.074  |
| 1                             | -1.344 | -2.223 | 1.281  | 1                             | 0.001  | 1.265  | -0.551 |
| 1                             | 0.148  | 0.756  | -0.881 | 1                             | 0.535  | 0.086  | -1.758 |
| 1                             | 0.760  | -0.589 | -1.849 | 1                             | 0.437  | -1.110 | 2.217  |
| 1                             | 0.584  | -1.054 | 2.269  | 1                             | -0.061 | 0.541  | 1.843  |
| 1                             | 0.057  | 0.486  | 1.585  | 1                             | 2.109  | 0.849  | 0.697  |
| 1                             | 2.270  | 0.623  | 0.375  | 1                             | 2.428  | -0.794 | 1.242  |
| 1                             | 2.572  | -0.834 | 1.318  | 1                             | 2.636  | 0.196  | -1.643 |
| 1                             | 2.844  | -0.627 | -1.720 | 1                             | 2.770  | -1.490 | -1.170 |
| 1                             | 3.037  | -2.104 | -0.788 | 1                             | -3.522 | -1.317 | -1.988 |
| 1                             | -3.281 | -2.076 | -1.949 | 1                             | -4.217 | -0.308 | 2.125  |
| 1                             | -4.065 | -0.500 | 1.965  | 1                             | -5.791 | -2.232 | -2.147 |
| 1                             | -5.521 | -3.076 | -1.994 | 1                             | -6.496 | -1.231 | 1.963  |
| 1                             | -6.314 | -1.505 | 1.916  | 1                             | -7.300 | -2.202 | -0.178 |
| 1                             | -7.057 | -2.804 | -0.066 | 1                             | -2.136 | 3.850  | 0.533  |
| 1                             | -2.046 | 3.439  | -0.352 | 1                             | -3.850 | 3.473  | 0.670  |
| 1                             | -3.758 | 3.052  | -0.237 | 1                             | 4.354  | 1.862  | -0.964 |
| 1                             | 4.475  | 1.238  | -1.519 | 1                             | 4.765  | -2.268 | 0.080  |
| 1                             | 5.025  | -2.400 | 0.668  | 1                             | -4.117 | 3.764  | -1.824 |
| 1                             | -3.889 | 2.858  | -2.750 | 1                             | -2.396 | 4.145  | -1.962 |
| 1                             | -2.167 | 3.248  | -2.867 | 1                             | -3.476 | 5.236  | -1.085 |
| 1                             | -3.308 | 4.456  | -2.267 | 1                             | 6.704  | 2.257  | -0.349 |
| 1                             | 6.787  | 1.904  | -1.003 | 1                             | 7.117  | -1.884 | 0.696  |
| 1                             | 7.340  | -1.744 | 1.186  | 1                             | 8.824  | -0.233 | 1.170  |
| 1                             | 8.962  | 0.055  | 1.199  | 1                             | 8.664  | 1.372  | 0.767  |
| 1                             | 8.747  | 1.469  | 0.351  | 8                             | 0.516  | -3.092 | -1.254 |
| 8                             | -2.837 | 4.237  | 2.009  | 1                             | 0.577  | -2.349 | -0.618 |
| 1                             | -2.722 | 4.382  | 2.949  | 1                             | 0.375  | -3.869 | -0.710 |
| 1                             | -2.687 | 3.287  | 1.893  |                               |        |        |        |
| Anileridine                   |        |        |        | Anileridine                   |        |        |        |
| motif 4, Eint = -7.3 kcal/mol |        |        |        | motif 5, Eint = -9.1 kcal/mol |        |        |        |
| 8                             | -2.658 | 1.750  | -0.522 | 8                             | -2.721 | 2.072  | -0.351 |
| 8                             | -2.325 | 1.375  | 1.669  | 8                             | -2.439 | 1.643  | 1.837  |
| 7                             | 0.660  | -0.967 | 0.076  | 7                             | 0.645  | -0.612 | 0.206  |
| 7                             | 8.438  | 0.148  | 0.329  | 7                             | 8.429  | 0.424  | 0.512  |
| 6                             | -2.257 | -0.502 | 0.117  | 6                             | -2.281 | -0.192 | 0.241  |
| 6                             | -1.431 | -0.625 | -1.167 | 6                             | -1.451 | -0.277 | -1.043 |
| 6                             | -1.509 | -1.270 | 1.221  | 6                             | -1.524 | -0.963 | 1.336  |
| 6                             | 0.000  | -0.164 | -0.950 | 6                             | -0.022 | 0.190  | -0.824 |
| 6                             | -0.057 | -0.844 | 1.340  | 6                             | -0.084 | -0.500 | 1.472  |
| 6                             | -3.684 | -1.035 | -0.021 | 6                             | -3.694 | -0.758 | 0.087  |
| 6                             | 2.052  | -0.582 | 0.258  | 6                             | 2.040  | -0.215 | 0.396  |
| 6                             | -2.397 | 0.967  | 0.527  | 6                             | -2.465 | 1.261  | 0.691  |
| 6                             | 2.950  | -0.899 | -0.935 | 6                             | 2.930  | -0.464 | -0.820 |
| 6                             | -4.178 | -1.558 | -1.216 | 6                             | -4.161 | -1.295 | -1.113 |
| 6                             | -4.535 | -0.998 | 1.090  | 6                             | -4.557 | -0.741 | 1.188  |
| 6                             | 4.395  | -0.629 | -0.623 | 6                             | 4.378  | -0.234 | -0.490 |
| 6                             | -5.479 | -2.046 | -1.296 | 6                             | -5.450 | -1.814 | -1.205 |
| 6                             | -5.835 | -1.480 | 1.010  | 6                             | -5.844 | -1.255 | 1.096  |
| 6                             | -6.312 | -2.010 | -0.185 | 6                             | -6.295 | -1.798 | -0.103 |
| 6                             | -2.846 | 3.161  | -0.240 | 6                             | -2.995 | 3.449  | -0.013 |
| 6                             | 4.956  | 0.634  | -0.818 | 6                             | 4.955  | 1.033  | -0.595 |
| 6                             | 5.214  | -1.618 | -0.073 | 6                             | 5.184  | -1.269 | -0.012 |
| 6                             | -3.273 | 3.820  | -1.521 | 6                             | -3.260 | 4.186  | -1.296 |
|                               |        |        |        | 6                             | 6.278  | 1.262  | -0.246 |
|                               |        |        |        | 6                             | 6.509  | -1.056 | 0.340  |
|                               |        |        |        | 6                             | 7.078  | 0.218  | 0.229  |



|                               |        |        |        |                               |        |        |        |
|-------------------------------|--------|--------|--------|-------------------------------|--------|--------|--------|
| 6                             | 6.276  | 0.904  | -0.486 | 1                             | -1.909 | 0.311  | -1.841 |
| 6                             | 6.536  | -1.364 | 0.263  | 1                             | -1.421 | -1.321 | -1.374 |
| 6                             | 7.089  | -0.094 | 0.062  | 1                             | -2.031 | -0.849 | 2.297  |
| 1                             | -1.886 | -0.052 | -1.978 | 1                             | -1.550 | -2.027 | 1.074  |
| 1                             | -1.417 | -1.678 | -1.470 | 1                             | 0.001  | 1.265  | -0.551 |
| 1                             | -2.007 | -1.128 | 2.183  | 1                             | 0.535  | 0.086  | -1.758 |
| 1                             | -1.561 | -2.336 | 0.977  | 1                             | 0.437  | -1.110 | 2.217  |
| 1                             | 0.017  | 0.914  | -0.679 | 1                             | -0.061 | 0.541  | 1.843  |
| 1                             | 0.556  | -0.260 | -1.885 | 1                             | 2.109  | 0.849  | 0.697  |
| 1                             | 0.452  | -1.467 | 2.083  | 1                             | 2.428  | -0.794 | 1.242  |
| 1                             | -0.009 | 0.198  | 1.717  | 1                             | 2.636  | 0.196  | -1.643 |
| 1                             | 2.142  | 0.497  | 0.506  | 1                             | 2.770  | -1.490 | -1.170 |
| 1                             | 2.431  | -1.125 | 1.133  | 1                             | -3.522 | -1.317 | -1.988 |
| 1                             | 2.648  | -0.304 | -1.803 | 1                             | -4.217 | -0.308 | 2.125  |
| 1                             | 2.804  | -1.950 | -1.208 | 1                             | -5.791 | -2.232 | -2.147 |
| 1                             | -3.548 | -1.590 | -2.099 | 1                             | -6.496 | -1.231 | 1.963  |
| 1                             | -4.175 | -0.576 | 2.024  | 1                             | -7.300 | -2.202 | -0.178 |
| 1                             | -5.842 | -2.453 | -2.234 | 1                             | -2.136 | 3.850  | 0.533  |
| 1                             | -6.478 | -1.440 | 1.884  | 1                             | -3.850 | 3.473  | 0.670  |
| 1                             | -7.327 | -2.390 | -0.249 | 1                             | 4.354  | 1.862  | -0.964 |
| 1                             | -1.901 | 3.559  | 0.139  | 1                             | 4.765  | -2.268 | 0.080  |
| 1                             | -3.594 | 3.255  | 0.552  | 1                             | -4.117 | 3.764  | -1.824 |
| 1                             | 4.345  | 1.427  | -1.244 | 1                             | -2.396 | 4.145  | -1.962 |
| 1                             | 4.807  | -2.612 | 0.093  | 1                             | -3.476 | 5.236  | -1.085 |
| 1                             | -4.210 | 3.399  | -1.892 | 1                             | 6.704  | 2.257  | -0.349 |
| 1                             | -2.514 | 3.703  | -2.297 | 1                             | 7.117  | -1.884 | 0.696  |
| 1                             | -3.424 | 4.888  | -1.355 | 1                             | 8.824  | -0.233 | 1.170  |
| 1                             | 6.690  | 1.894  | -0.659 | 1                             | 8.664  | 1.372  | 0.767  |
| 1                             | 7.153  | -2.156 | 0.679  | 8                             | 0.516  | -3.092 | -1.254 |
| 1                             | 8.839  | -0.454 | 1.033  | 1                             | 0.577  | -2.349 | -0.618 |
| 1                             | 8.659  | 1.116  | 0.516  | 1                             | 0.375  | -3.869 | -0.710 |
| 8                             | 0.043  | 3.017  | 1.465  |                               |        |        |        |
| 1                             | -0.697 | 2.515  | 1.835  |                               |        |        |        |
| 1                             | 0.823  | 2.594  | 1.830  |                               |        |        |        |
| Anileridine                   |        |        |        | Bupropion                     |        |        |        |
| motif 6, Eint = -4.9 kcal/mol |        |        |        | motif 1, Eint = -4.9 kcal/mol |        |        |        |
| 8                             | -2.670 | 1.761  | 0.271  | 17                            | 2.914  | -2.109 | 0.089  |
| 8                             | -2.338 | 0.709  | 2.235  | 8                             | -0.478 | 3.156  | -0.629 |
| 7                             | 0.762  | -0.934 | 0.006  | 7                             | -1.753 | 0.354  | 0.659  |
| 7                             | 8.536  | 0.131  | 0.516  | 6                             | -2.572 | -0.889 | 0.725  |
| 6                             | -2.165 | -0.574 | 0.174  | 6                             | -1.502 | 0.980  | -0.645 |
| 6                             | -1.336 | -0.273 | -1.079 | 6                             | -2.047 | -1.664 | 1.932  |
| 6                             | -1.391 | -1.621 | 0.994  | 6                             | -4.035 | -0.518 | 0.974  |
| 6                             | 0.086  | 0.129  | -0.724 | 6                             | -2.453 | -1.763 | -0.524 |
| 6                             | 0.046  | -1.206 | 1.250  | 6                             | -2.722 | 1.689  | -1.198 |
| 6                             | -3.572 | -1.085 | -0.140 | 6                             | -0.347 | 1.962  | -0.454 |
| 6                             | 2.154  | -0.608 | 0.287  | 6                             | 0.982  | 1.406  | -0.034 |
| 6                             | -2.368 | 0.682  | 1.029  | 6                             | 1.281  | 0.044  | -0.147 |
| 6                             | 3.043  | -0.557 | -0.953 | 6                             | 1.950  | 2.286  | 0.454  |
| 6                             | -4.051 | -1.219 | -1.444 | 6                             | 2.537  | -0.404 | 0.234  |
| 6                             | -4.420 | -1.433 | 0.918  | 6                             | 3.196  | 1.815  | 0.840  |
| 6                             | 4.489  | -0.376 | -0.589 | 6                             | 3.503  | 0.461  | 0.732  |
| 6                             | -5.334 | -1.703 | -1.684 | 1                             | -0.861 | 0.152  | 1.097  |
| 6                             | -5.702 | -1.912 | 0.679  | 1                             | -1.152 | 0.246  | -1.400 |
| 6                             | -6.163 | -2.053 | -0.627 | 1                             | -2.073 | -1.042 | 2.831  |
| 6                             | -3.015 | 2.972  | 0.999  | 1                             | -2.652 | -2.554 | 2.120  |
| 6                             | 5.034  | 0.895  | -0.392 | 1                             | -1.013 | -1.990 | 1.769  |
| 6                             | 5.326  | -1.473 | -0.378 | 1                             | -4.464 | 0.039  | 0.139  |
| 6                             | -3.769 | 3.876  | 0.064  | 1                             | -4.123 | 0.102  | 1.868  |
| 6                             | 6.355  | 1.069  | -0.006 | 1                             | -4.641 | -1.419 | 1.115  |
| 6                             | 6.650  | -1.316 | 0.007  | 1                             | -1.414 | -2.028 | -0.743 |
| 6                             | 7.187  | -0.038 | 0.200  | 1                             | -3.014 | -2.692 | -0.386 |
| 1                             | -1.813 | 0.502  | -1.687 | 1                             | -2.864 | -1.270 | -1.410 |
| 1                             | -1.295 | -1.180 | -1.691 | 1                             | -2.452 | 2.284  | -2.072 |
| 1                             | -1.894 | -1.793 | 1.949  | 1                             | -3.490 | 0.975  | -1.501 |
| 1                             | -1.410 | -2.562 | 0.435  | 1                             | -3.147 | 2.361  | -0.450 |
| 1                             | 0.082  | 1.074  | -0.134 | 1                             | 0.560  | -0.658 | -0.552 |
| 1                             | 0.642  | 0.339  | -1.642 | 1                             | 1.698  | 3.339  | 0.522  |
| 1                             | 0.574  | -2.006 | 1.777  | 1                             | 3.944  | 2.499  | 1.227  |
| 1                             | 0.063  | -0.322 | 1.918  | 1                             | 4.474  | 0.080  | 1.027  |
| 1                             | 2.242  | 0.349  | 0.843  | 8                             | 0.591  | -2.186 | -2.323 |
| 1                             | 2.540  | -1.382 | 0.961  | 1                             | 0.457  | -2.752 | -3.086 |
| 1                             | 2.729  | 0.261  | -1.610 | 1                             | 1.430  | -2.476 | -1.948 |
| 1                             | 2.901  | -1.485 | -1.519 |                               |        |        |        |

|                               |        |        |        |
|-------------------------------|--------|--------|--------|
| 1                             | -3.426 | -0.948 | -2.287 |
| 1                             | -4.073 | -1.315 | 1.940  |
| 1                             | -5.684 | -1.804 | -2.707 |
| 1                             | -6.342 | -2.175 | 1.515  |
| 1                             | -7.163 | -2.429 | -0.816 |
| 1                             | -2.082 | 3.423  | 1.353  |
| 1                             | -3.599 | 2.684  | 1.875  |
| 1                             | 4.408  | 1.771  | -0.545 |
| 1                             | 4.932  | -2.477 | -0.521 |
| 1                             | -4.687 | 3.398  | -0.285 |
| 1                             | -3.167 | 4.152  | -0.803 |
| 1                             | -4.045 | 4.793  | 0.589  |
| 1                             | 6.755  | 2.070  | 0.131  |
| 1                             | 7.282  | -2.188 | 0.152  |
| 1                             | 8.954  | -0.653 | 0.997  |
| 1                             | 8.750  | 0.998  | 0.988  |
| 8                             | -0.987 | 3.285  | -1.629 |
| 1                             | -0.348 | 2.842  | -2.191 |
| 1                             | -1.448 | 2.568  | -1.176 |
| Bupropion                     |        |        |        |
| motif 2, Eint = -3.6 kcal/mol |        |        |        |
| 17                            | 2.703  | -1.699 | -0.782 |
| 8                             | -1.331 | 3.093  | -0.103 |
| 7                             | -2.119 | -0.079 | 0.574  |
| 6                             | -2.730 | -1.423 | 0.394  |
| 6                             | -2.068 | 0.851  | -0.558 |
| 6                             | -2.027 | -2.332 | 1.400  |
| 6                             | -4.218 | -1.360 | 0.740  |
| 6                             | -2.545 | -1.992 | -1.014 |
| 6                             | -3.412 | 1.477  | -0.868 |
| 6                             | -1.031 | 1.923  | -0.217 |
| 6                             | 0.388  | 1.484  | -0.024 |
| 6                             | 0.843  | 0.231  | -0.450 |
| 6                             | 1.285  | 2.364  | 0.588  |
| 6                             | 2.170  | -0.116 | -0.246 |
| 6                             | 2.607  | 1.993  | 0.784  |
| 6                             | 3.069  | 0.745  | 0.370  |
| 1                             | -1.179 | -0.214 | 0.930  |
| 1                             | -1.695 | 0.362  | -1.482 |
| 1                             | -2.107 | -1.922 | 2.411  |
| 1                             | -2.471 | -3.330 | 1.405  |
| 1                             | -0.963 | -2.440 | 1.158  |
| 1                             | -4.776 | -0.734 | 0.042  |
| 1                             | -4.357 | -0.947 | 1.742  |
| 1                             | -4.662 | -2.360 | 0.713  |
| 1                             | -1.486 | -2.052 | -1.290 |
| 1                             | -2.953 | -3.005 | -1.069 |
| 1                             | -3.061 | -1.396 | -1.772 |
| 1                             | -3.296 | 2.290  | -1.587 |
| 1                             | -4.100 | 0.745  | -1.296 |
| 1                             | -3.861 | 1.889  | 0.038  |
| 1                             | 0.177  | -0.468 | -0.944 |
| 1                             | 0.916  | 3.334  | 0.903  |
| 1                             | 3.298  | 2.676  | 1.267  |
| 1                             | 4.101  | 0.446  | 0.520  |
| 8                             | 5.781  | -1.055 | 0.394  |
| 1                             | 5.155  | -1.617 | -0.074 |
| 1                             | 6.618  | -1.203 | -0.052 |
| Bupropion                     |        |        |        |
| motif 3, Eint = -6.0 kcal/mol |        |        |        |
| 17                            | 3.786  | -1.306 | -0.736 |
| 8                             | -1.207 | 2.458  | 0.033  |
| 7                             | -1.297 | -0.821 | 0.593  |
| 6                             | -1.611 | -2.260 | 0.371  |
| 6                             | -1.436 | 0.126  | -0.518 |
| 6                             | -0.736 | -3.027 | 1.361  |
| 6                             | -3.080 | -2.521 | 0.704  |
| 6                             | -1.301 | -2.737 | -1.048 |
| 6                             | -2.880 | 0.445  | -0.847 |
| 6                             | -0.661 | 1.381  | -0.128 |
| 6                             | 0.817  | 1.263  | 0.066  |
| 6                             | 1.535  | 0.150  | -0.386 |
| 6                             | 1.494  | 2.304  | 0.708  |
| 6                             | 2.906  | 0.090  | -0.179 |
| 6                             | 2.865  | 2.226  | 0.908  |
| 6                             | 3.583  | 1.119  | 0.468  |
| 1                             | -0.351 | -0.769 | 0.953  |
| 1                             | -0.947 | -0.244 | -1.444 |
| 1                             | -0.906 | -2.671 | 2.381  |
| 1                             | -0.959 | -4.096 | 1.335  |
| 1                             | 0.328  | -2.901 | 1.127  |
| 1                             | -3.756 | -2.007 | 0.020  |
| 1                             | -3.306 | -2.177 | 1.716  |
| 1                             | -3.303 | -3.591 | 0.645  |
| 1                             | -0.252 | -2.566 | -1.313 |
| 1                             | -1.487 | -3.811 | -1.136 |
| 1                             | -1.926 | -2.242 | -1.797 |
| 1                             | -2.944 | 1.268  | -1.561 |
| 1                             | -3.377 | -0.417 | -1.294 |
| 1                             | -3.431 | 0.733  | 0.050  |
| 1                             | 1.041  | -0.664 | -0.903 |
| 1                             | 0.922  | 3.160  | 1.044  |
| 1                             | 3.388  | 3.032  | 1.413  |
| 1                             | 4.653  | 1.048  | 0.621  |
| 8                             | -3.896 | 3.528  | -0.301 |
| 1                             | -3.014 | 3.158  | -0.148 |
| 1                             | -3.797 | 4.457  | -0.086 |
| Bupropion                     |        |        |        |
| motif 4, Eint = -6.6 kcal/mol |        |        |        |
| 17                            | 1.740  | -3.439 | -0.547 |
| 8                             | 0.412  | 2.721  | -0.422 |
| 7                             | -1.738 | 0.353  | 0.525  |
| 6                             | -2.913 | -0.557 | 0.446  |
| 6                             | -1.274 | 1.041  | -0.684 |
| 6                             | -2.701 | -1.596 | 1.544  |
| 6                             | -4.190 | 0.229  | 0.748  |
| 6                             | -3.042 | -1.268 | -0.903 |
| 6                             | -2.178 | 2.187  | -1.093 |
| 6                             | 0.146  | 1.532  | -0.408 |
| 6                             | 1.197  | 0.511  | -0.118 |
| 6                             | 1.003  | -0.840 | -0.435 |
| 6                             | 2.399  | 0.913  | 0.474  |
| 6                             | 1.999  | -1.761 | -0.152 |
| 6                             | 3.382  | -0.027 | 0.752  |
| 6                             | 3.193  | -1.370 | 0.444  |
| Bupropion                     |        |        |        |
| motif 5, Eint = -9.1 kcal/mol |        |        |        |
| 17                            | 3.435  | -2.169 | -0.194 |
| 8                             | -0.474 | 2.763  | -0.711 |
| 7                             | -1.521 | -0.158 | 0.236  |
| 6                             | -2.334 | -1.412 | 0.246  |
| 6                             | -1.211 | 0.504  | -1.045 |
| 6                             | -1.993 | -2.086 | 1.573  |
| 6                             | -3.826 | -1.077 | 0.236  |
| 6                             | -1.985 | -2.343 | -0.914 |
| 6                             | -2.428 | 1.118  | -1.709 |
| 6                             | -0.184 | 1.584  | -0.691 |
| 6                             | 1.181  | 1.144  | -0.264 |
| 6                             | 1.623  | -0.174 | -0.420 |
| 6                             | 2.035  | 2.091  | 0.310  |
| 6                             | 2.898  | -0.524 | 0.001  |
| 6                             | 3.306  | 1.724  | 0.726  |
| 6                             | 3.749  | 0.413  | 0.576  |

|                               |        |        |        |                                |        |        |        |
|-------------------------------|--------|--------|--------|--------------------------------|--------|--------|--------|
| 1                             | -0.967 | -0.177 | 0.915  | 1                              | -0.640 | -0.381 | 0.691  |
| 1                             | -1.184 | 0.351  | -1.549 | 1                              | -0.734 | -0.190 | -1.761 |
| 1                             | -2.561 | -1.110 | 2.513  | 1                              | -2.203 | -1.416 | 2.410  |
| 1                             | -3.562 | -2.265 | 1.623  | 1                              | -2.583 | -2.996 | 1.710  |
| 1                             | -1.818 | -2.212 | 1.339  | 1                              | -0.934 | -2.367 | 1.614  |
| 1                             | -4.403 | 0.979  | -0.015 | 1                              | -4.156 | -0.662 | -0.716 |
| 1                             | -4.100 | 0.744  | 1.706  | 1                              | -4.067 | -0.355 | 1.019  |
| 1                             | -5.052 | -0.444 | 0.796  | 1                              | -4.410 | -1.985 | 0.414  |
| 1                             | -2.141 | -1.842 | -1.144 | 1                              | -0.919 | -2.596 | -0.918 |
| 1                             | -3.880 | -1.970 | -0.882 | 1                              | -2.544 | -3.279 | -0.832 |
| 1                             | -3.229 | -0.569 | -1.723 | 1                              | -2.235 | -1.903 | -1.884 |
| 1                             | -1.711 | 2.778  | -1.883 | 1                              | -2.116 | 1.811  | -2.491 |
| 1                             | -3.133 | 1.817  | -1.470 | 1                              | -3.057 | 0.355  | -2.169 |
| 1                             | -2.371 | 2.845  | -0.244 | 1                              | -3.028 | 1.675  | -0.987 |
| 1                             | 0.089  | -1.178 | -0.911 | 1                              | 0.992  | -0.929 | -0.877 |
| 1                             | 2.557  | 1.958  | 0.717  | 1                              | 1.675  | 3.107  | 0.420  |
| 1                             | 4.312  | 0.287  | 1.215  | 1                              | 3.966  | 2.459  | 1.175  |
| 1                             | 3.957  | -2.108 | 0.658  | 1                              | 4.740  | 0.116  | 0.899  |
| 8                             | 2.742  | 4.189  | 0.364  | 8                              | -2.745 | 1.954  | 1.879  |
| 1                             | 2.502  | 5.037  | 0.741  | 1                              | -2.318 | 1.244  | 1.364  |
| 1                             | 1.914  | 3.840  | 0.002  | 1                              | -2.419 | 2.759  | 1.468  |
| Aspirin                       |        |        |        | Aspirin                        |        |        |        |
| motif 1, Eint = -4.8 kcal/mol |        |        |        | motif 2, Eint = -3.5 kcal/mol  |        |        |        |
| 8                             | 1.156  | -0.222 | -0.115 | 8                              | -1.787 | 0.347  | -0.753 |
| 8                             | -2.250 | 2.280  | -0.506 | 8                              | 1.626  | -1.953 | 0.258  |
| 8                             | -0.031 | 2.158  | -0.798 | 8                              | -0.568 | -2.029 | -0.175 |
| 8                             | 0.996  | 1.011  | 1.782  | 8                              | -2.348 | -0.121 | 1.393  |
| 6                             | -0.146 | -0.668 | 0.015  | 6                              | -0.594 | 0.906  | -0.348 |
| 6                             | -1.246 | 0.184  | -0.163 | 6                              | 0.507  | 0.114  | 0.021  |
| 6                             | -0.319 | -2.019 | 0.275  | 6                              | -0.494 | 2.288  | -0.387 |
| 6                             | -2.527 | -0.369 | -0.051 | 6                              | 1.699  | 0.763  | 0.371  |
| 6                             | -1.600 | -2.547 | 0.366  | 6                              | 0.701  | 2.908  | -0.046 |
| 6                             | -2.708 | -1.719 | 0.209  | 6                              | 1.798  | 2.145  | 0.340  |
| 6                             | -1.071 | 1.611  | -0.511 | 6                              | 0.417  | -1.357 | 0.019  |
| 6                             | 1.624  | 0.707  | 0.812  | 6                              | -2.573 | -0.241 | 0.223  |
| 6                             | 2.963  | 1.194  | 0.386  | 6                              | -3.682 | -0.997 | -0.419 |
| 1                             | 0.562  | -2.639 | 0.405  | 1                              | -1.365 | 2.861  | -0.683 |
| 1                             | -3.383 | 0.281  | -0.182 | 1                              | 2.559  | 0.174  | 0.667  |
| 1                             | -1.732 | -3.604 | 0.568  | 1                              | 0.771  | 3.991  | -0.075 |
| 1                             | -3.710 | -2.125 | 0.286  | 1                              | 2.731  | 2.623  | 0.616  |
| 1                             | 3.609  | 0.362  | 0.101  | 1                              | -4.106 | -0.445 | -1.258 |
| 1                             | 3.417  | 1.775  | 1.185  | 1                              | -4.450 | -1.229 | 0.315  |
| 1                             | 2.829  | 1.828  | -0.494 | 1                              | -3.267 | -1.929 | -0.812 |
| 1                             | -2.036 | 3.191  | -0.751 | 1                              | 1.445  | -2.903 | 0.280  |
| 8                             | 3.230  | -1.962 | -1.120 | 8                              | 4.434  | -1.209 | -0.255 |
| 1                             | 2.468  | -1.377 | -1.027 | 1                              | 3.522  | -1.524 | -0.250 |
| 1                             | 3.349  | -2.056 | -2.067 | 1                              | 4.630  | -1.064 | -1.183 |
| Aspirin                       |        |        |        | Aspirin                        |        |        |        |
| motif 3, Eint = -6.9 kcal/mol |        |        |        | motif 4, Eint = -11.5 kcal/mol |        |        |        |
| 8                             | 0.822  | -1.116 | -0.117 | 8                              | 0.471  | 1.612  | -0.611 |
| 8                             | -0.685 | 2.771  | 0.508  | 8                              | -1.261 | -2.177 | 0.228  |
| 8                             | 1.081  | 1.675  | -0.317 | 8                              | -1.678 | -0.092 | -0.493 |
| 8                             | 1.089  | -0.289 | 1.980  | 8                              | -0.375 | 1.728  | 1.489  |
| 6                             | -0.523 | -0.809 | -0.119 | 6                              | 1.195  | 0.477  | -0.311 |
| 6                             | -0.999 | 0.509  | -0.028 | 6                              | 0.585  | -0.766 | -0.081 |
| 6                             | -1.403 | -1.873 | -0.252 | 6                              | 2.576  | 0.605  | -0.308 |
| 6                             | -2.384 | 0.715  | -0.053 | 6                              | 1.416  | -1.867 | 0.166  |
| 6                             | -2.772 | -1.642 | -0.300 | 6                              | 3.378  | -0.504 | -0.073 |
| 6                             | -3.265 | -0.345 | -0.194 | 6                              | 2.796  | -1.744 | 0.170  |
| 6                             | -0.081 | 1.663  | 0.034  | 6                              | -0.883 | -0.949 | -0.136 |
| 6                             | 1.578  | -0.762 | 0.995  | 6                              | -0.372 | 2.117  | 0.356  |
| 6                             | 3.008  | -1.075 | 0.737  | 6                              | -1.223 | 3.186  | -0.239 |
| 1                             | -0.997 | -2.875 | -0.312 | 1                              | 3.004  | 1.584  | -0.491 |
| 1                             | -2.755 | 1.729  | 0.027  | 1                              | 0.951  | -2.828 | 0.347  |
| 1                             | -3.453 | -2.479 | -0.410 | 1                              | 4.457  | -0.395 | -0.073 |
| 1                             | -4.333 | -0.161 | -0.222 | 1                              | 3.416  | -2.613 | 0.360  |
| 1                             | 3.126  | -2.131 | 0.487  | 1                              | -0.636 | 3.854  | -0.869 |
| 1                             | 3.604  | -0.832 | 1.613  | 1                              | -1.723 | 3.746  | 0.548  |
| 1                             | 3.348  | -0.504 | -0.131 | 1                              | -1.970 | 2.707  | -0.876 |
| 1                             | -0.018 | 3.471  | 0.488  | 1                              | -2.244 | -2.221 | 0.163  |
| 8                             | 2.502  | 0.140  | -2.358 | 8                              | -3.906 | -1.677 | -0.176 |
| 1                             | 2.005  | -0.679 | -2.291 | 1                              | -3.492 | -0.819 | -0.372 |
| 1                             | 2.037  | 0.720  | -1.739 | 1                              | -4.567 | -1.501 | 0.497  |
| Aspirin                       |        |        |        | Dantrolene                     |        |        |        |
| motif 5, Eint = -6.4 kcal/mol |        |        |        | motif 1, Eint = -8.1 kcal/mol  |        |        |        |
| 8                             | 0.457  | -0.832 | -1.119 | 8                              | -0.538 | -0.426 | 0.000  |
| 8                             | -1.253 | 2.794  | 0.290  | 8                              | 6.384  | 2.148  | -0.001 |
| 8                             | 0.468  | 1.895  | -0.828 | 8                              | 5.501  | -2.360 | 0.000  |
| 8                             | 1.582  | -0.383 | 0.783  | 8                              | -7.756 | 0.333  | 0.000  |
| 6                             | -0.754 | -0.756 | -0.460 | 8                              | -6.864 | 2.315  | 0.000  |
| 6                             | -1.293 | 0.467  | -0.030 | 7                              | 4.085  | -0.496 | 0.001  |
| 6                             | -1.455 | -1.941 | -0.299 | 7                              | 6.269  | -0.158 | 0.000  |
| 6                             | -2.555 | 0.450  | 0.578  | 7                              | 2.931  | -1.184 | 0.001  |
| 6                             | -2.708 | -1.931 | 0.299  | 7                              | -6.793 | 1.091  | 0.000  |

|                               |        |        |        |                                |        |        |        |
|-------------------------------|--------|--------|--------|--------------------------------|--------|--------|--------|
| 6                             | -3.258 | -0.733 | 0.744  | 6                              | 4.250  | 0.947  | 0.000  |
| 6                             | -0.580 | 1.744  | -0.243 | 6                              | -1.618 | -1.259 | 0.000  |
| 6                             | 1.592  | -0.532 | -0.413 | 6                              | -2.924 | -0.654 | 0.000  |
| 6                             | 2.762  | -0.435 | -1.324 | 6                              | 0.581  | -1.205 | 0.000  |
| 1                             | -1.002 | -2.862 | -0.648 | 6                              | 5.756  | 1.111  | -0.001 |
| 1                             | -2.977 | 1.388  | 0.914  | 6                              | 5.297  | -1.179 | 0.000  |
| 1                             | -3.251 | -2.862 | 0.423  | 6                              | -1.181 | -2.565 | 0.000  |
| 1                             | -4.234 | -0.720 | 1.216  | 6                              | 0.224  | -2.532 | 0.000  |
| 1                             | 2.741  | -1.226 | -2.074 | 6                              | -4.076 | -1.462 | 0.000  |
| 1                             | 3.688  | -0.462 | -0.753 | 6                              | -3.078 | 0.744  | 0.000  |
| 1                             | 2.688  | 0.520  | -1.851 | 6                              | 1.830  | -0.507 | 0.001  |
| 1                             | -0.717 | 3.575  | 0.096  | 6                              | -5.455 | 0.488  | 0.000  |
| 8                             | 4.324  | -0.375 | 1.585  | 6                              | -5.336 | -0.899 | 0.000  |
| 1                             | 4.569  | 0.166  | 2.337  | 6                              | -4.337 | 1.315  | 0.000  |
| 1                             | 3.358  | -0.306 | 1.538  | 1                              | 3.811  | 1.428  | 0.881  |
|                               |        |        |        | 1                              | 3.810  | 1.427  | -0.881 |
|                               |        |        |        | 1                              | -1.809 | -3.443 | 0.000  |
|                               |        |        |        | 1                              | 7.256  | -0.369 | -0.001 |
|                               |        |        |        | 1                              | 0.913  | -3.361 | 0.000  |
|                               |        |        |        | 1                              | -3.976 | -2.542 | -0.001 |
|                               |        |        |        | 1                              | -2.197 | 1.376  | 0.001  |
|                               |        |        |        | 1                              | 1.783  | 0.585  | 0.001  |
|                               |        |        |        | 1                              | -6.232 | -1.506 | -0.001 |
|                               |        |        |        | 1                              | -4.474 | 2.389  | 0.000  |
|                               |        |        |        | 8                              | 4.133  | 3.838  | 0.000  |
|                               |        |        |        | 1                              | 5.072  | 3.595  | 0.000  |
|                               |        |        |        | 1                              | 4.121  | 4.797  | 0.005  |
| Dantrolene                    |        |        |        | Dantrolene                     |        |        |        |
| motif 2, Eint = -5.7 kcal/mol |        |        |        | motif 3, Eint = -5.7 kcal/mol  |        |        |        |
| 8                             | 0.061  | -0.452 | 0.006  | 8                              | 0.187  | -0.053 | 0.016  |
| 8                             | 6.638  | 2.917  | 0.052  | 8                              | 7.111  | 2.529  | -0.056 |
| 8                             | 6.275  | -1.665 | -0.038 | 8                              | 6.218  | -1.980 | 0.017  |
| 8                             | -7.189 | -0.588 | 0.065  | 8                              | -7.048 | 0.710  | -0.008 |
| 8                             | -6.582 | 1.492  | 0.019  | 8                              | -6.132 | 2.672  | 0.043  |
| 7                             | 4.661  | 0.027  | -0.001 | 7                              | 4.811  | -0.111 | -0.005 |
| 7                             | 6.795  | 0.607  | 0.005  | 7                              | 6.999  | 0.217  | -0.021 |
| 7                             | 3.596  | -0.789 | -0.014 | 7                              | 3.659  | -0.798 | 0.010  |
| 7                             | -6.331 | 0.285  | 0.038  | 7                              | -6.064 | 1.451  | 0.019  |
| 6                             | 4.663  | 1.479  | 0.027  | 6                              | 4.982  | 1.331  | -0.028 |
| 6                             | -0.912 | -1.407 | -0.010 | 6                              | -0.891 | -0.890 | 0.032  |
| 6                             | -2.280 | -0.964 | 0.004  | 6                              | -2.199 | -0.291 | 0.030  |
| 6                             | 1.265  | -1.092 | -0.012 | 6                              | 1.308  | -0.828 | 0.021  |
| 6                             | 6.144  | 1.820  | 0.031  | 6                              | 6.493  | 1.497  | -0.038 |
| 6                             | 5.948  | -0.513 | -0.015 | 6                              | 6.028  | -0.797 | 0.000  |
| 6                             | -0.322 | -2.652 | -0.038 | 6                              | -0.449 | -2.194 | 0.048  |
| 6                             | 1.069  | -2.452 | -0.039 | 6                              | 0.956  | -2.157 | 0.041  |
| 6                             | -3.326 | -1.905 | -0.010 | 6                              | -3.347 | -1.103 | 0.047  |
| 6                             | -2.603 | 0.404  | 0.031  | 6                              | -2.358 | 1.107  | 0.010  |
| 6                             | 2.422  | -0.251 | 0.000  | 6                              | 2.556  | -0.128 | 0.005  |
| 6                             | -4.929 | -0.132 | 0.027  | 6                              | -4.735 | 0.837  | 0.024  |
| 6                             | -4.643 | -1.497 | 0.002  | 6                              | -4.613 | -0.551 | 0.044  |
| 6                             | -3.920 | 0.826  | 0.042  | 6                              | -3.619 | 1.670  | 0.008  |
| 1                             | 4.175  | 1.878  | 0.924  | 1                              | 4.549  | 1.815  | 0.854  |
| 1                             | 4.171  | 1.913  | -0.851 | 1                              | 4.541  | 1.788  | -0.921 |
| 1                             | -0.841 | -3.598 | -0.056 | 1                              | -1.074 | -3.074 | 0.062  |
| 1                             | 7.800  | 0.508  | 0.001  | 1                              | 7.985  | 0.001  | -0.022 |
| 1                             | 1.852  | -3.193 | -0.058 | 1                              | 1.648  | -2.984 | 0.049  |
| 1                             | -3.098 | -2.965 | -0.031 | 1                              | -3.244 | -2.182 | 0.063  |
| 1                             | -1.807 | 1.139  | 0.043  | 1                              | -1.482 | 1.743  | -0.005 |
| 1                             | 2.242  | 0.828  | 0.021  | 1                              | 2.503  | 0.965  | -0.011 |
| 1                             | -5.459 | -2.209 | -0.008 | 1                              | -5.490 | -1.188 | 0.060  |
| 1                             | -4.157 | 1.884  | 0.064  | 1                              | -3.760 | 2.743  | -0.007 |
| 8                             | -4.995 | 3.914  | -0.182 | 8                              | -7.447 | -2.158 | -0.217 |
| 1                             | -5.327 | 4.686  | 0.280  | 1                              | -7.586 | -1.203 | -0.194 |
| 1                             | -5.724 | 3.281  | -0.153 | 1                              | -8.206 | -2.524 | 0.241  |
| Dantrolene                    |        |        |        | Dantrolene                     |        |        |        |
| motif 4, Eint = -9.3 kcal/mol |        |        |        | motif 5, Eint = -10.1 kcal/mol |        |        |        |
| 8                             | -0.471 | 0.014  | -0.005 | 8                              | -0.807 | 0.263  | 0.003  |
| 8                             | 6.196  | -3.201 | 0.007  | 8                              | 6.073  | -2.432 | 0.020  |
| 8                             | 5.683  | 1.369  | -0.024 | 8                              | 5.254  | 2.088  | 0.006  |
| 8                             | -7.726 | -0.109 | -0.002 | 8                              | -8.038 | -0.352 | -0.006 |
| 8                             | -7.008 | -2.160 | 0.026  | 8                              | -7.185 | -2.351 | -0.001 |
| 7                             | 4.138  | -0.374 | -0.003 | 7                              | 3.819  | 0.242  | 0.010  |
| 7                             | 6.287  | -0.887 | -0.009 | 7                              | 6.005  | -0.121 | 0.008  |
| 7                             | 3.059  | 0.432  | -0.007 | 7                              | 2.679  | 0.947  | 0.007  |
| 7                             | -6.832 | -0.947 | 0.010  | 7                              | -7.090 | -1.129 | -0.003 |
| 6                             | 4.177  | -1.823 | 0.005  | 6                              | 3.967  | -1.201 | 0.013  |
| 6                             | -1.471 | 0.939  | -0.015 | 6                              | -1.870 | 1.119  | -0.001 |
| 6                             | -2.825 | 0.452  | -0.009 | 6                              | -3.188 | 0.540  | -0.001 |
| 6                             | 0.713  | 0.696  | -0.013 | 6                              | 0.328  | 1.019  | 0.003  |
| 6                             | 5.669  | -2.120 | 0.002  | 6                              | 5.472  | -1.378 | 0.014  |
| 6                             | 5.403  | 0.199  | -0.013 | 6                              | 5.050  | 0.908  | 0.007  |
| 6                             | -0.919 | 2.202  | -0.030 | 6                              | -1.406 | 2.415  | -0.003 |
| 6                             | 0.479  | 2.051  | -0.029 | 6                              | -0.001 | 2.353  | -0.001 |

|                                |        |        |        |                                |        |        |        |
|--------------------------------|--------|--------|--------|--------------------------------|--------|--------|--------|
| 6                              | -3.901 | 1.359  | -0.021 | 6                              | -4.323 | 1.371  | -0.004 |
| 6                              | -3.101 | -0.926 | 0.009  | 6                              | -3.369 | -0.854 | 0.001  |
| 6                              | 1.889  | -0.116 | -0.006 | 6                              | 1.563  | 0.296  | 0.007  |
| 6                              | -5.446 | -0.463 | 0.003  | 6                              | -5.740 | -0.552 | -0.003 |
| 6                              | -5.206 | 0.908  | -0.015 | 6                              | -5.594 | 0.832  | -0.005 |
| 6                              | -4.405 | -1.385 | 0.016  | 6                              | -4.639 | -1.401 | 0.001  |
| 1                              | 3.698  | -2.259 | -0.880 | 1                              | 3.525  | -1.668 | -0.875 |
| 1                              | 3.703  | -2.249 | 0.896  | 1                              | 3.523  | -1.665 | 0.900  |
| 1                              | -1.467 | 3.132  | -0.040 | 1                              | -2.014 | 3.306  | -0.006 |
| 1                              | 7.288  | -0.758 | -0.014 | 1                              | 7.014  | 0.035  | 0.007  |
| 1                              | 1.240  | 2.820  | -0.036 | 1                              | 0.706  | 3.168  | -0.002 |
| 1                              | -3.706 | 2.425  | -0.036 | 1                              | -4.202 | 2.449  | -0.006 |
| 1                              | -2.279 | -1.632 | 0.019  | 1                              | -2.501 | -1.503 | 0.004  |
| 1                              | 1.733  | -1.199 | 0.000  | 1                              | 1.491  | -0.796 | 0.009  |
| 1                              | -6.045 | 1.592  | -0.025 | 1                              | -6.479 | 1.457  | -0.008 |
| 1                              | -4.637 | -2.443 | 0.030  | 1                              | -4.797 | -2.472 | 0.002  |
| 8                              | 3.310  | 3.433  | 0.097  | 8                              | 8.564  | -1.142 | -0.096 |
| 1                              | 4.138  | 3.908  | 0.007  | 1                              | 8.020  | -1.941 | -0.025 |
| 1                              | 3.576  | 2.503  | 0.063  | 1                              | 9.418  | -1.360 | 0.280  |
| Dantrolene                     |        |        |        | Cycloserine                    |        |        |        |
| motif 6, Eint = -10.5 kcal/mol |        |        |        | motif 1, Eint = -5.8 kcal/mol  |        |        |        |
| 8                              | -0.766 | -0.141 | 0.004  | 8                              | -1.065 | -0.087 | 1.174  |
| 8                              | 5.917  | 3.012  | 0.004  | 8                              | 1.453  | -1.559 | -0.706 |
| 8                              | 5.397  | -1.551 | 0.019  | 7                              | -0.206 | -1.184 | 0.854  |
| 8                              | -8.021 | 0.017  | -0.008 | 7                              | 1.934  | 1.285  | -0.316 |
| 8                              | -7.293 | 2.065  | -0.007 | 6                              | 0.612  | 0.697  | -0.249 |
| 7                              | 3.845  | 0.192  | 0.013  | 6                              | -0.192 | 1.048  | 0.993  |
| 7                              | 6.003  | 0.697  | 0.009  | 6                              | 0.695  | -0.817 | -0.126 |
| 7                              | 2.757  | -0.594 | 0.013  | 1                              | -0.011 | 0.872  | -1.141 |
| 7                              | -7.122 | 0.851  | -0.006 | 1                              | 0.471  | 1.154  | 1.861  |
| 6                              | 3.897  | 1.643  | 0.004  | 1                              | -0.845 | 1.916  | 0.903  |
| 6                              | -1.771 | -1.064 | 0.003  | 1                              | -0.745 | -2.037 | 0.769  |
| 6                              | -3.124 | -0.571 | 0.000  | 1                              | 1.930  | 2.105  | -0.911 |
| 6                              | 0.416  | -0.822 | 0.007  | 1                              | 2.557  | 0.613  | -0.760 |
| 6                              | 5.391  | 1.929  | 0.005  | 8                              | -2.442 | 0.241  | -1.274 |
| 6                              | 5.115  | -0.377 | 0.014  | 1                              | -2.328 | 0.094  | -0.325 |
| 6                              | -1.225 | -2.328 | 0.005  | 1                              | -3.390 | 0.240  | -1.417 |
| 6                              | 0.174  | -2.175 | 0.007  |                                |        |        |        |
| 6                              | -4.205 | -1.471 | -0.001 |                                |        |        |        |
| 6                              | -3.392 | 0.810  | 0.000  |                                |        |        |        |
| 6                              | 1.600  | -0.020 | 0.008  |                                |        |        |        |
| 6                              | -5.739 | 0.359  | -0.004 |                                |        |        |        |
| 6                              | -5.507 | -1.013 | -0.004 |                                |        |        |        |
| 6                              | -4.694 | 1.276  | -0.003 |                                |        |        |        |
| 1                              | 3.420  | 2.080  | 0.889  |                                |        |        |        |
| 1                              | 3.424  | 2.069  | -0.887 |                                |        |        |        |
| 1                              | -1.775 | -3.256 | 0.005  |                                |        |        |        |
| 1                              | 7.008  | 0.515  | 0.008  |                                |        |        |        |
| 1                              | 0.931  | -2.943 | 0.009  |                                |        |        |        |
| 1                              | -4.016 | -2.539 | -0.001 |                                |        |        |        |
| 1                              | -2.567 | 1.511  | 0.001  |                                |        |        |        |
| 1                              | 1.455  | 1.065  | 0.004  |                                |        |        |        |
| 1                              | -6.350 | -1.693 | -0.005 |                                |        |        |        |
| 1                              | -4.919 | 2.335  | -0.003 |                                |        |        |        |
| 8                              | 8.156  | -1.042 | -0.113 |                                |        |        |        |
| 1                              | 8.867  | -1.466 | 0.370  |                                |        |        |        |
| 1                              | 7.391  | -1.634 | -0.041 |                                |        |        |        |
| Cycloserine                    |        |        |        | Cycloserine                    |        |        |        |
| motif 2, Eint = -6.8 kcal/mol  |        |        |        | motif 3, Eint = -10.4 kcal/mol |        |        |        |
| 8                              | -0.888 | -0.975 | -0.143 | 8                              | -0.388 | 1.814  | 0.107  |
| 8                              | 0.913  | 1.990  | -0.026 | 8                              | 0.808  | -1.452 | 0.060  |
| 7                              | -0.700 | 0.401  | -0.485 | 7                              | 0.592  | 0.833  | -0.159 |
| 7                              | 2.659  | -0.315 | -0.026 | 7                              | -2.068 | -1.359 | -0.299 |
| 6                              | 1.288  | -0.387 | 0.427  | 6                              | -1.340 | -0.303 | 0.370  |
| 6                              | 0.449  | -1.495 | -0.186 | 6                              | -1.612 | 1.102  | -0.145 |
| 6                              | 0.508  | 0.847  | -0.018 | 6                              | 0.153  | -0.417 | 0.093  |
| 1                              | 1.176  | -0.411 | 1.526  | 1                              | -1.431 | -0.320 | 1.471  |
| 1                              | 0.760  | -1.667 | -1.225 | 1                              | -1.817 | 1.065  | -1.223 |
| 1                              | 0.429  | -2.437 | 0.362  | 1                              | -2.397 | 1.656  | 0.371  |
| 1                              | -1.581 | 0.892  | -0.343 | 1                              | 1.558  | 1.140  | -0.067 |
| 1                              | 3.285  | -0.762 | 0.633  | 1                              | -2.899 | -1.613 | 0.221  |
| 1                              | 2.928  | 0.667  | -0.060 | 1                              | -1.475 | -2.186 | -0.325 |
| 8                              | -3.388 | 0.216  | 0.311  | 8                              | 3.202  | -0.025 | -0.104 |
| 1                              | -4.256 | 0.150  | -0.092 | 1                              | 2.629  | -0.811 | -0.060 |
| 1                              | -3.032 | -0.679 | 0.293  | 1                              | 3.984  | -0.243 | 0.405  |
| Cycloserine                    |        |        |        | Cycloserine                    |        |        |        |
| motif 4, Eint = -8.7 kcal/mol  |        |        |        | motif 5, Eint = -7.7 kcal/mol  |        |        |        |
| 8                              | 2.341  | -0.189 | 0.288  | 8                              | -1.734 | -0.976 | -0.293 |
| 8                              | -0.847 | -1.451 | -0.226 | 8                              | -0.066 | 2.070  | -0.207 |
| 7                              | 1.426  | -1.153 | -0.207 | 7                              | -1.331 | 0.254  | -0.875 |
| 7                              | -0.722 | 1.532  | -0.508 | 7                              | 1.323  | 0.082  | 1.326  |
| 6                              | 0.190  | 0.739  | 0.288  | 6                              | -0.100 | -0.029 | 1.058  |
| 6                              | 1.655  | 1.042  | 0.015  | 6                              | -0.568 | -1.349 | 0.465  |
| 6                              | 0.132  | -0.743 | -0.066 | 6                              | -0.486 | 0.942  | -0.053 |

|                                                    |        |        |        |                                                    |        |        |        |
|----------------------------------------------------|--------|--------|--------|----------------------------------------------------|--------|--------|--------|
| 1                                                  | 0.001  | 0.770  | 1.379  | 1                                                  | -0.738 | 0.238  | 1.919  |
| 1                                                  | 1.781  | 1.322  | -1.039 | 1                                                  | 0.200  | -1.761 | -0.201 |
| 1                                                  | 2.110  | 1.792  | 0.662  | 1                                                  | -0.905 | -2.096 | 1.183  |
| 1                                                  | 1.732  | -2.094 | 0.002  | 1                                                  | -2.083 | 0.681  | -1.398 |
| 1                                                  | -0.730 | 2.484  | -0.157 | 1                                                  | 1.558  | -0.326 | 2.224  |
| 1                                                  | -1.674 | 1.184  | -0.375 | 1                                                  | 1.550  | 1.073  | 1.386  |
| 8                                                  | -3.178 | -0.023 | 0.323  | 8                                                  | 2.197  | -0.740 | -1.352 |
| 1                                                  | -3.997 | -0.302 | -0.091 | 1                                                  | 2.126  | -0.462 | -0.422 |
| 1                                                  | -2.537 | -0.725 | 0.117  | 1                                                  | 2.098  | 0.077  | -1.847 |
| Aminoglutethimide<br>motif 1, Eint = -9.1 kcal/mol |        |        |        | Aminoglutethimide<br>motif 2, Eint = -7.4 kcal/mol |        |        |        |
| 8                                                  | -1.769 | 0.137  | -1.743 | 8                                                  | 0.630  | 2.281  | 1.713  |
| 8                                                  | -2.156 | -2.120 | 2.156  | 8                                                  | 2.973  | -1.541 | 1.273  |
| 7                                                  | -1.957 | -0.916 | 0.249  | 7                                                  | 1.775  | 0.364  | 1.398  |
| 7                                                  | 4.908  | -1.062 | -0.493 | 7                                                  | -4.681 | -1.764 | 0.201  |
| 6                                                  | -0.430 | 1.028  | 0.060  | 6                                                  | 0.253  | 1.142  | -0.401 |
| 6                                                  | -0.796 | 1.195  | 1.545  | 6                                                  | 1.291  | 0.440  | -1.288 |
| 6                                                  | -0.472 | 2.373  | -0.693 | 6                                                  | -0.157 | 2.510  | -0.984 |
| 6                                                  | 0.972  | 0.424  | -0.084 | 6                                                  | -1.018 | 0.305  | -0.208 |
| 6                                                  | -0.794 | -0.140 | 2.266  | 6                                                  | 1.762  | -0.881 | -0.704 |
| 6                                                  | -1.440 | 0.072  | -0.567 | 6                                                  | 0.880  | 1.353  | 0.975  |
| 6                                                  | -1.685 | -1.154 | 1.601  | 6                                                  | 2.233  | -0.750 | 0.713  |
| 6                                                  | -1.787 | 3.130  | -0.609 | 6                                                  | 0.982  | 3.477  | -1.265 |
| 6                                                  | 1.248  | -0.695 | -0.872 | 6                                                  | -1.849 | 0.506  | 0.899  |
| 6                                                  | 2.051  | 1.022  | 0.574  | 6                                                  | -1.448 | -0.613 | -1.170 |
| 6                                                  | 2.535  | -1.201 | -0.992 | 6                                                  | -3.041 | -0.186 | 1.049  |
| 6                                                  | 3.340  | 0.528  | 0.462  | 6                                                  | -2.639 | -1.310 | -1.032 |
| 6                                                  | 3.606  | -0.600 | -0.325 | 6                                                  | -3.457 | -1.112 | 0.086  |
| 1                                                  | -1.789 | 1.650  | 1.622  | 1                                                  | 2.154  | 1.105  | -1.404 |
| 1                                                  | -0.103 | 1.894  | 2.023  | 1                                                  | 0.892  | 0.298  | -2.296 |
| 1                                                  | -0.227 | 2.171  | -1.739 | 1                                                  | -0.863 | 2.967  | -0.284 |
| 1                                                  | 0.344  | 2.992  | -0.301 | 1                                                  | -0.723 | 2.312  | -1.902 |
| 1                                                  | -1.111 | -0.060 | 3.307  | 1                                                  | 2.568  | -1.338 | -1.282 |
| 1                                                  | 0.218  | -0.564 | 2.282  | 1                                                  | 0.953  | -1.622 | -0.694 |
| 1                                                  | -2.594 | -1.576 | -0.208 | 1                                                  | 2.123  | 0.474  | 2.345  |
| 1                                                  | -2.627 | 2.516  | -0.945 | 1                                                  | 1.593  | 3.646  | -0.374 |
| 1                                                  | -2.005 | 3.477  | 0.404  | 1                                                  | 1.638  | 3.128  | -2.066 |
| 1                                                  | -1.760 | 4.015  | -1.249 | 1                                                  | 0.591  | 4.448  | -1.575 |
| 1                                                  | 0.450  | -1.189 | -1.418 | 1                                                  | -1.564 | 1.225  | 1.661  |
| 1                                                  | 1.887  | 1.900  | 1.193  | 1                                                  | -0.850 | -0.796 | -2.058 |
| 1                                                  | 2.715  | -2.072 | -1.616 | 1                                                  | -3.662 | -0.006 | 1.921  |
| 1                                                  | 4.156  | 1.020  | 0.984  | 1                                                  | -2.943 | -2.015 | -1.800 |
| 1                                                  | 5.541  | -0.837 | 0.260  | 1                                                  | -4.749 | -2.636 | -0.302 |
| 1                                                  | 4.983  | -2.033 | -0.758 | 1                                                  | -5.027 | -1.855 | 1.144  |
| 8                                                  | -3.597 | -1.951 | -1.860 | 8                                                  | 3.598  | -3.470 | -0.711 |
| 1                                                  | -3.053 | -1.231 | -2.219 | 1                                                  | 3.506  | -2.951 | 0.105  |
| 1                                                  | -3.592 | -2.641 | -2.526 | 1                                                  | 4.349  | -4.044 | -0.551 |
| Aminoglutethimide<br>motif 3, Eint = -9.4 kcal/mol |        |        |        | Abacavir<br>motif 1, Eint = -6.6 kcal/mol          |        |        |        |
| 8                                                  | -1.458 | 0.794  | -2.000 | 8                                                  | -4.517 | 1.942  | 0.340  |
| 8                                                  | -2.616 | -2.009 | 1.353  | 7                                                  | 4.002  | -0.362 | -0.367 |
| 7                                                  | -2.014 | -0.552 | -0.277 | 7                                                  | -0.350 | -1.799 | 0.031  |
| 7                                                  | 4.807  | -1.518 | -0.297 | 7                                                  | 1.791  | -2.443 | -0.278 |
| 6                                                  | -0.267 | 1.179  | 0.075  | 7                                                  | 2.316  | 1.219  | -0.071 |
| 6                                                  | -0.835 | 1.159  | 1.503  | 7                                                  | -0.021 | 0.616  | 0.175  |
| 6                                                  | -0.023 | 2.618  | -0.422 | 7                                                  | 0.680  | 2.813  | 0.190  |
| 6                                                  | 1.053  | 0.404  | -0.012 | 6                                                  | 5.012  | 0.622  | -0.592 |
| 6                                                  | -1.099 | -0.259 | 1.975  | 6                                                  | 5.559  | 1.368  | 0.584  |
| 6                                                  | -1.286 | 0.498  | -0.838 | 6                                                  | 6.389  | 0.317  | -0.092 |
| 6                                                  | -1.971 | -1.027 | 1.022  | 6                                                  | -1.802 | -1.912 | 0.196  |
| 6                                                  | -1.225 | 3.546  | -0.361 | 6                                                  | -2.600 | -1.088 | -0.839 |
| 6                                                  | 1.363  | -0.430 | -1.089 | 6                                                  | -3.612 | -0.237 | -0.044 |
| 6                                                  | 2.033  | 0.567  | 0.971  | 6                                                  | -2.285 | -1.400 | 1.524  |
| 6                                                  | 2.585  | -1.082 | -1.175 | 6                                                  | -3.262 | -0.509 | 1.389  |
| 6                                                  | 3.258  | -0.077 | 0.895  | 6                                                  | 2.688  | -0.058 | -0.205 |
| 6                                                  | 3.556  | -0.920 | -0.183 | 6                                                  | 0.401  | -0.645 | 0.033  |
| 1                                                  | -1.772 | 1.727  | 1.520  | 6                                                  | 1.713  | -1.072 | -0.159 |
| 1                                                  | -0.159 | 1.677  | 2.189  | 6                                                  | -3.522 | 1.233  | -0.412 |
| 1                                                  | 0.340  | 2.551  | -1.451 | 6                                                  | 0.547  | -2.830 | -0.159 |
| 1                                                  | 0.804  | 3.030  | 0.169  | 6                                                  | 1.005  | 1.476  | 0.109  |
| 1                                                  | -1.574 | -0.299 | 2.956  | 1                                                  | 4.923  | 1.176  | -1.524 |
| 1                                                  | -0.157 | -0.816 | 2.064  | 1                                                  | 5.132  | 1.129  | 1.550  |
| 1                                                  | -2.643 | -1.057 | -0.911 | 1                                                  | 5.819  | 2.410  | 0.444  |
| 1                                                  | -2.079 | 3.131  | -0.903 | 1                                                  | 7.230  | 0.624  | -0.702 |
| 1                                                  | -1.542 | 3.753  | 0.664  | 1                                                  | 6.530  | -0.623 | 0.429  |
| 1                                                  | -0.989 | 4.508  | -0.821 | 1                                                  | -2.004 | -2.986 | 0.095  |
| 1                                                  | 0.644  | -0.572 | -1.890 | 1                                                  | -3.092 | -1.733 | -1.569 |
| 1                                                  | 1.846  | 1.216  | 1.822  | 1                                                  | -1.914 | -0.444 | -1.394 |
| 1                                                  | 2.794  | -1.722 | -2.028 | 1                                                  | -4.642 | -0.559 | -0.248 |
| 1                                                  | 3.999  | 0.076  | 1.675  | 1                                                  | 4.198  | -1.323 | -0.608 |
| 1                                                  | 5.295  | -1.657 | 0.576  | 1                                                  | -1.861 | -1.750 | 2.458  |
| 1                                                  | 4.831  | -2.350 | -0.868 | 1                                                  | -3.772 | -0.011 | 2.206  |
| 8                                                  | -3.971 | -2.502 | -1.022 | 1                                                  | -3.702 | 1.357  | -1.489 |
| 1                                                  | -3.987 | -3.355 | -1.460 | 1                                                  | -2.516 | 1.607  | -0.181 |

|                                |        |        |        |                                |        |        |        |
|--------------------------------|--------|--------|--------|--------------------------------|--------|--------|--------|
| 1                              | -3.685 | -2.678 | -0.110 | 1                              | 0.200  | -3.855 | -0.201 |
|                                |        |        |        | 1                              | -4.394 | 2.882  | 0.188  |
|                                |        |        |        | 1                              | 1.450  | 3.412  | 0.445  |
|                                |        |        |        | 1                              | -0.186 | 3.006  | 0.667  |
|                                |        |        |        | 8                              | -6.733 | 0.780  | -1.009 |
|                                |        |        |        | 1                              | -6.138 | 1.261  | -0.413 |
|                                |        |        |        | 1                              | -7.572 | 0.753  | -0.545 |
| Abacavir                       |        |        |        | Abacavir                       |        |        |        |
| motif 2, Eint = -11.8 kcal/mol |        |        |        | motif 3, Eint = -12.4 kcal/mol |        |        |        |
| 8                              | 5.366  | -1.897 | -0.081 | 8                              | 5.578  | -1.298 | -0.393 |
| 7                              | -3.346 | -0.071 | -0.238 | 7                              | -3.815 | 0.551  | -0.297 |
| 7                              | 0.957  | 1.595  | 0.062  | 7                              | 0.602  | 1.745  | 0.145  |
| 7                              | -1.214 | 2.156  | -0.090 | 7                              | -1.511 | 2.508  | -0.072 |
| 7                              | -1.558 | -1.543 | -0.119 | 7                              | -2.207 | -1.129 | -0.189 |
| 7                              | 0.752  | -0.830 | 0.046  | 7                              | 0.160  | -0.658 | 0.071  |
| 7                              | 0.169  | -3.057 | -0.058 | 7                              | -0.651 | -2.812 | -0.107 |
| 6                              | -4.287 | -1.136 | -0.376 | 6                              | -4.881 | -0.358 | -0.576 |
| 6                              | -4.799 | -1.826 | 0.852  | 6                              | -5.431 | -1.181 | 0.546  |
| 6                              | -5.680 | -0.875 | 0.095  | 6                              | -6.225 | -0.034 | -0.004 |
| 6                              | 2.409  | 1.759  | 0.172  | 6                              | 2.055  | 1.791  | 0.275  |
| 6                              | 3.191  | 1.049  | -0.956 | 6                              | 2.807  | 1.192  | -0.927 |
| 6                              | 4.294  | 0.217  | -0.273 | 6                              | 4.065  | 0.533  | -0.340 |
| 6                              | 2.976  | 1.174  | 1.434  | 6                              | 2.602  | 1.016  | 1.444  |
| 6                              | 3.996  | 0.357  | 1.191  | 6                              | 3.704  | 0.351  | 1.108  |
| 6                              | -2.017 | -0.284 | -0.148 | 6                              | -2.516 | 0.169  | -0.196 |
| 6                              | 0.254  | 0.409  | 0.016  | 6                              | -0.201 | 0.631  | 0.049  |
| 6                              | -1.084 | 0.779  | -0.079 | 6                              | -1.492 | 1.130  | -0.082 |
| 6                              | 4.300  | -1.228 | -0.741 | 6                              | 4.441  | -0.754 | -1.051 |
| 6                              | 0.018  | 2.595  | -0.005 | 6                              | -0.252 | 2.830  | 0.063  |
| 6                              | -0.231 | -1.739 | -0.028 | 6                              | -0.908 | -1.473 | -0.060 |
| 1                              | -4.154 | -1.751 | -1.262 | 1                              | -4.847 | -0.827 | -1.557 |
| 1                              | -4.396 | -1.494 | 1.801  | 1                              | -4.964 | -1.054 | 1.514  |
| 1                              | -5.003 | -2.888 | 0.790  | 1                              | -5.748 | -2.192 | 0.320  |
| 1                              | -6.500 | -1.272 | -0.491 | 1                              | -7.098 | -0.242 | -0.610 |
| 1                              | -5.877 | 0.094  | 0.540  | 1                              | -6.303 | 0.860  | 0.605  |
| 1                              | 2.563  | 2.846  | 0.143  | 1                              | 2.289  | 2.859  | 0.395  |
| 1                              | 3.594  | 1.764  | -1.674 | 1                              | 3.018  | 1.931  | -1.703 |
| 1                              | 2.511  | 0.392  | -1.505 | 1                              | 2.172  | 0.418  | -1.373 |
| 1                              | 5.291  | 0.630  | -0.485 | 1                              | 4.930  | 1.212  | -0.404 |
| 1                              | -3.678 | 0.889  | -0.324 | 1                              | -3.968 | 1.539  | -0.439 |
| 1                              | 2.574  | 1.425  | 2.410  | 1                              | 2.154  | 1.069  | 2.430  |
| 1                              | 4.572  | -0.172 | 1.942  | 1                              | 4.322  | -0.236 | 1.780  |
| 1                              | 4.432  | -1.258 | -1.834 | 1                              | 4.662  | -0.540 | -2.109 |
| 1                              | 3.325  | -1.681 | -0.508 | 1                              | 3.595  | -1.452 | -1.011 |
| 1                              | 0.314  | 3.635  | 0.011  | 1                              | 0.141  | 3.837  | 0.113  |
| 1                              | 5.350  | -2.820 | -0.341 | 1                              | 5.711  | -2.191 | -0.719 |
| 1                              | -0.551 | -3.717 | 0.192  | 1                              | -1.447 | -3.412 | 0.029  |
| 1                              | 1.074  | -3.234 | 0.350  | 1                              | 0.249  | -3.128 | 0.235  |
| 8                              | -3.932 | 2.796  | -0.409 | 8                              | 2.180  | -2.553 | 0.663  |
| 1                              | -2.961 | 2.846  | -0.284 | 1                              | 2.707  | -2.420 | 1.453  |
| 1                              | -4.304 | 3.333  | 0.293  | 1                              | 1.707  | -1.704 | 0.533  |
| Abacavir                       |        |        |        | diazepam                       |        |        |        |
| motif 4, Eint = -11.2 kcal/mol |        |        |        | motif 1, Eint = -5.4 kcal/mol  |        |        |        |
| 8                              | -4.957 | 2.401  | 0.088  | 17                             | -0.648 | 4.083  | -0.317 |
| 7                              | 3.290  | -1.002 | -0.312 | 8                              | 3.670  | -2.675 | -0.321 |
| 7                              | -1.225 | -1.813 | -0.046 | 7                              | 2.718  | -0.757 | 0.449  |
| 7                              | 0.817  | -2.754 | -0.257 | 7                              | 0.467  | -2.033 | -1.024 |
| 7                              | 1.828  | 0.807  | -0.152 | 6                              | 0.548  | 0.251  | -0.154 |
| 7                              | -0.576 | 0.537  | 0.026  | 6                              | 1.899  | 0.371  | 0.234  |
| 7                              | 0.412  | 2.618  | -0.010 | 6                              | -0.086 | -1.064 | -0.385 |
| 6                              | 4.458  | -0.187 | -0.405 | 6                              | 1.792  | -1.810 | -1.561 |
| 6                              | 4.977  | 0.471  | 0.840  | 6                              | 2.822  | -1.817 | -0.449 |
| 6                              | 5.704  | -0.697 | 0.247  | 6                              | -1.461 | -1.281 | 0.129  |
| 6                              | -2.681 | -1.723 | 0.094  | 6                              | -0.225 | 1.409  | -0.322 |
| 6                              | -3.344 | -0.830 | -0.978 | 6                              | 2.422  | 1.648  | 0.482  |
| 6                              | -4.272 | 0.146  | -0.228 | 6                              | 3.739  | -0.695 | 1.488  |
| 6                              | -3.113 | -1.112 | 1.397  | 6                              | 0.328  | 2.656  | -0.095 |
| 6                              | -3.976 | -0.118 | 1.219  | 6                              | 1.650  | 2.785  | 0.321  |
| 6                              | 2.028  | -0.515 | -0.225 | 6                              | -1.925 | -0.629 | 1.276  |
| 6                              | -0.324 | -0.772 | -0.060 | 6                              | -2.316 | -2.168 | -0.536 |
| 6                              | 0.921  | -1.381 | -0.193 | 6                              | -3.214 | -0.852 | 1.745  |
| 6                              | -4.033 | 1.592  | -0.628 | 6                              | -3.609 | -2.378 | -0.077 |
| 6                              | -0.471 | -2.964 | -0.166 | 6                              | -4.064 | -1.720 | 1.066  |
| 6                              | 0.552  | 1.258  | -0.032 | 1                              | 1.862  | -0.853 | -2.102 |
| 1                              | 4.569  | 0.366  | -1.337 | 1                              | 2.049  | -2.618 | -2.245 |
| 1                              | 4.406  | 0.304  | 1.746  | 1                              | -1.262 | 1.319  | -0.634 |
| 1                              | 5.400  | 1.463  | 0.749  | 1                              | 3.454  | 1.750  | 0.794  |
| 1                              | 6.647  | -0.525 | -0.258 | 1                              | 3.357  | -0.129 | 2.337  |
| 1                              | 5.638  | -1.647 | 0.764  | 1                              | 4.666  | -0.231 | 1.131  |
| 1                              | -3.026 | -2.763 | 0.018  | 1                              | 3.976  | -1.712 | 1.793  |
| 1                              | -3.879 | -1.425 | -1.720 | 1                              | 2.071  | 3.767  | 0.505  |
| 1                              | -2.569 | -0.274 | -1.513 | 1                              | -1.270 | 0.055  | 1.806  |
| 1                              | -5.329 | -0.076 | -0.432 | 1                              | -1.945 | -2.676 | -1.420 |
| 1                              | 3.367  | -1.996 | -0.476 | 1                              | -3.556 | -0.346 | 2.642  |

|                                           |        |        |        |                                           |        |        |        |
|-------------------------------------------|--------|--------|--------|-------------------------------------------|--------|--------|--------|
| 1                                         | -2.743 | -1.479 | 2.348  | 1                                         | -4.267 | -3.058 | -0.609 |
| 1                                         | -4.435 | 0.466  | 2.009  | 1                                         | -5.074 | -1.888 | 1.426  |
| 1                                         | -4.173 | 1.700  | -1.715 | 8                                         | -3.360 | 1.017  | -1.311 |
| 1                                         | -2.991 | 1.858  | -0.395 | 1                                         | -3.632 | 0.155  | -0.976 |
| 1                                         | -0.953 | -3.932 | -0.181 | 1                                         | -4.012 | 1.624  | -0.951 |
| 1                                         | -4.779 | 3.320  | -0.122 |                                           |        |        |        |
| 1                                         | 1.244  | 3.163  | 0.186  |                                           |        |        |        |
| 1                                         | -0.463 | 2.955  | 0.354  |                                           |        |        |        |
| 8                                         | 3.334  | 3.221  | 0.022  |                                           |        |        |        |
| 1                                         | 3.605  | 3.499  | -0.855 |                                           |        |        |        |
| 1                                         | 3.060  | 2.287  | -0.090 |                                           |        |        |        |
| diazepam<br>motif 2, Eint = -3.7 kcal/mol |        |        |        | diazepam<br>motif 3, Eint = -6.8 kcal/mol |        |        |        |
| 17                                        | -2.951 | -2.495 | -0.734 | 17                                        | 3.333  | -2.979 | -1.012 |
| 8                                         | 1.210  | 4.322  | -0.070 | 8                                         | -3.907 | 0.050  | 0.591  |
| 7                                         | -0.090 | 2.558  | 0.545  | 7                                         | -1.914 | -0.976 | 0.927  |
| 7                                         | 2.056  | 1.237  | -1.027 | 7                                         | -1.152 | 1.371  | -0.719 |
| 6                                         | -0.035 | 0.231  | -0.269 | 6                                         | 0.263  | -0.534 | -0.147 |
| 6                                         | -0.741 | 1.353  | 0.215  | 6                                         | -0.666 | -1.419 | 0.438  |
| 6                                         | 1.431  | 0.258  | -0.474 | 6                                         | -0.026 | 0.911  | -0.303 |
| 6                                         | 1.275  | 2.366  | -1.480 | 6                                         | -2.187 | 0.418  | -1.067 |
| 6                                         | 0.819  | 3.197  | -0.297 | 6                                         | -2.772 | -0.169 | 0.199  |
| 6                                         | 2.234  | -0.908 | -0.033 | 6                                         | 1.039  | 1.889  | 0.025  |
| 6                                         | -0.743 | -0.944 | -0.551 | 6                                         | 1.493  | -1.038 | -0.587 |
| 6                                         | -2.121 | 1.243  | 0.438  | 6                                         | -0.317 | -2.766 | 0.599  |
| 6                                         | -0.605 | 3.354  | 1.653  | 6                                         | -2.466 | -1.606 | 2.121  |
| 6                                         | -2.109 | -1.009 | -0.349 | 6                                         | 1.803  | -2.379 | -0.443 |
| 6                                         | -2.813 | 0.076  | 0.162  | 6                                         | 0.904  | -3.251 | 0.165  |
| 6                                         | 1.809  | -1.739 | 1.010  | 6                                         | 2.049  | 1.595  | 0.949  |
| 6                                         | 3.470  | -1.166 | -0.638 | 6                                         | 1.015  | 3.159  | -0.565 |
| 6                                         | 2.600  | -2.800 | 1.437  | 6                                         | 3.010  | 2.545  | 1.273  |
| 6                                         | 4.253  | -2.230 | -0.217 | 6                                         | 1.980  | 4.102  | -0.248 |
| 6                                         | 3.821  | -3.052 | 0.822  | 6                                         | 2.982  | 3.798  | 0.672  |
| 1                                         | 0.390  | 2.055  | -2.057 | 1                                         | -1.802 | -0.404 | -1.691 |
| 1                                         | 1.893  | 3.008  | -2.107 | 1                                         | -2.989 | 0.923  | -1.604 |
| 1                                         | -0.207 | -1.809 | -0.925 | 1                                         | 2.211  | -0.364 | -1.041 |
| 1                                         | -2.667 | 2.096  | 0.824  | 1                                         | -1.023 | -3.447 | 1.060  |
| 1                                         | -0.956 | 2.690  | 2.442  | 1                                         | -1.654 | -1.858 | 2.803  |
| 1                                         | -1.423 | 4.014  | 1.344  | 1                                         | -3.035 | -2.511 | 1.883  |
| 1                                         | 0.203  | 3.981  | 2.025  | 1                                         | -3.146 | -0.903 | 2.596  |
| 1                                         | -3.883 | 0.010  | 0.332  | 1                                         | 1.155  | -4.298 | 0.283  |
| 1                                         | 0.863  | -1.543 | 1.505  | 1                                         | 2.072  | 0.622  | 1.431  |
| 1                                         | 3.798  | -0.512 | -1.439 | 1                                         | 0.224  | 3.382  | -1.273 |
| 1                                         | 2.262  | -3.429 | 2.255  | 1                                         | 3.781  | 2.305  | 1.998  |
| 1                                         | 5.205  | -2.423 | -0.701 | 1                                         | 1.955  | 5.078  | -0.720 |
| 1                                         | 4.435  | -3.884 | 1.150  | 1                                         | 3.736  | 4.538  | 0.920  |
| 8                                         | -5.829 | -1.122 | 0.299  | 8                                         | -5.389 | 1.247  | -1.519 |
| 1                                         | -5.312 | -1.866 | -0.027 | 1                                         | -5.047 | 0.899  | -0.680 |
| 1                                         | -6.516 | -1.521 | 0.837  | 1                                         | -5.889 | 2.026  | -1.271 |
| diazepam<br>motif 4, Eint = -7.3 kcal/mol |        |        |        | diazepam<br>motif 5, Eint = -7.4 kcal/mol |        |        |        |
| 17                                        | -2.093 | 3.995  | -0.423 | 17                                        | -3.348 | -2.909 | -0.942 |
| 8                                         | 3.487  | -1.745 | -0.474 | 8                                         | 0.225  | 4.165  | 0.275  |
| 7                                         | 2.145  | -0.098 | 0.339  | 7                                         | -0.987 | 2.289  | 0.711  |
| 7                                         | 0.233  | -1.758 | -1.207 | 7                                         | 1.363  | 1.200  | -0.729 |
| 6                                         | -0.174 | 0.467  | -0.290 | 6                                         | -0.687 | 0.005  | -0.179 |
| 6                                         | 1.118  | 0.847  | 0.128  | 6                                         | -1.512 | 1.052  | 0.287  |
| 6                                         | -0.523 | -0.948 | -0.553 | 6                                         | 0.782  | 0.145  | -0.271 |
| 6                                         | 1.488  | -1.247 | -1.717 | 6                                         | 0.534  | 2.287  | -1.206 |
| 6                                         | 2.477  | -1.070 | -0.586 | 6                                         | -0.068 | 3.029  | -0.030 |
| 6                                         | -1.817 | -1.468 | -0.051 | 6                                         | 1.633  | -0.982 | 0.175  |
| 6                                         | -1.152 | 1.457  | -0.453 | 6                                         | -1.277 | -1.211 | -0.551 |
| 6                                         | 1.377  | 2.195  | 0.405  | 6                                         | -2.892 | 0.828  | 0.399  |
| 6                                         | 3.091  | 0.122  | 1.432  | 6                                         | -1.643 | 2.991  | 1.808  |
| 6                                         | -0.863 | 2.786  | -0.199 | 6                                         | -2.644 | -1.394 | -0.458 |
| 6                                         | 0.401  | 3.163  | 0.245  | 6                                         | -3.460 | -0.378 | 0.031  |
| 6                                         | -2.446 | -0.910 | 1.068  | 6                                         | 1.209  | -1.848 | 1.192  |
| 6                                         | -2.408 | -2.575 | -0.674 | 6                                         | 2.901  | -1.172 | -0.390 |
| 6                                         | -3.636 | -1.442 | 1.551  | 6                                         | 2.033  | -2.874 | 1.636  |
| 6                                         | -3.599 | -3.098 | -0.196 | 6                                         | 3.716  | -2.204 | 0.050  |
| 6                                         | -4.218 | -2.533 | 0.917  | 6                                         | 3.287  | -3.058 | 1.063  |
| 1                                         | 1.366  | -0.282 | -2.235 | 1                                         | -0.276 | 1.931  | -1.861 |
| 1                                         | 1.916  | -1.965 | -2.415 | 1                                         | 1.150  | 2.993  | -1.763 |
| 1                                         | -2.146 | 1.172  | -0.776 | 1                                         | -0.646 | -2.017 | -0.911 |
| 1                                         | 2.366  | 2.489  | 0.738  | 1                                         | -3.530 | 1.621  | 0.769  |
| 1                                         | 2.579  | 0.633  | 2.246  | 1                                         | -1.991 | 2.267  | 2.544  |
| 1                                         | 3.963  | 0.702  | 1.119  | 1                                         | -2.489 | 3.597  | 1.465  |
| 1                                         | 3.453  | -0.844 | 1.781  | 1                                         | -0.917 | 3.664  | 2.261  |
| 1                                         | 0.618  | 4.205  | 0.450  | 1                                         | -4.530 | -0.530 | 0.111  |
| 1                                         | -1.992 | -0.065 | 1.576  | 1                                         | 0.236  | -1.704 | 1.651  |
| 1                                         | -1.909 | -3.009 | -1.533 | 1                                         | 3.240  | -0.506 | -1.176 |
| 1                                         | -4.106 | -1.004 | 2.425  | 1                                         | 1.695  | -3.530 | 2.432  |
| 1                                         | -4.051 | -3.950 | -0.694 | 1                                         | 4.692  | -2.344 | -0.403 |
| 1                                         | -5.151 | -2.945 | 1.289  | 1                                         | 3.928  | -3.864 | 1.405  |



|                                              |        |        |        |                                              |        |        |        |
|----------------------------------------------|--------|--------|--------|----------------------------------------------|--------|--------|--------|
| 8                                            | 5.946  | -0.966 | 0.768  | 8                                            | 4.090  | 1.844  | -1.494 |
| 1                                            | 6.686  | -1.503 | 0.481  | 1                                            | 3.224  | 1.653  | -1.092 |
| 1                                            | 5.180  | -1.345 | 0.309  | 1                                            | 4.516  | 2.441  | -0.876 |
| Anisindione<br>motif 1, Eint = -7.9 kcal/mol |        |        |        | Anisindione<br>motif 2, Eint = -7.9 kcal/mol |        |        |        |
| 8                                            | 0.945  | 2.014  | -0.612 | 8                                            | -0.582 | -2.689 | -1.096 |
| 8                                            | 0.585  | -2.687 | -1.108 | 8                                            | -0.945 | 2.011  | -0.596 |
| 8                                            | -5.101 | 0.429  | 0.489  | 8                                            | 5.105  | 0.447  | 0.490  |
| 6                                            | 0.268  | -0.260 | -1.186 | 6                                            | -0.267 | -0.262 | -1.173 |
| 6                                            | 1.175  | 0.821  | -0.586 | 6                                            | -0.980 | -1.574 | -0.842 |
| 6                                            | 0.981  | -1.572 | -0.853 | 6                                            | -1.177 | 0.818  | -0.575 |
| 6                                            | 2.353  | 0.154  | 0.003  | 6                                            | -2.248 | -1.234 | -0.159 |
| 6                                            | 2.244  | -1.231 | -0.161 | 6                                            | -2.359 | 0.151  | 0.005  |
| 6                                            | -1.166 | -0.145 | -0.739 | 6                                            | 1.168  | -0.142 | -0.728 |
| 6                                            | 3.458  | 0.722  | 0.637  | 6                                            | -3.242 | -2.093 | 0.296  |
| 6                                            | 3.236  | -2.090 | 0.301  | 6                                            | -3.468 | 0.718  | 0.631  |
| 6                                            | -1.995 | 0.825  | -1.314 | 6                                            | 1.975  | 0.867  | -1.267 |
| 6                                            | -1.684 | -0.933 | 0.284  | 6                                            | 1.710  | -0.966 | 0.253  |
| 6                                            | 4.445  | -0.140 | 1.099  | 6                                            | -4.348 | -1.532 | 0.921  |
| 6                                            | 4.338  | -1.528 | 0.933  | 6                                            | -4.458 | -0.145 | 1.086  |
| 6                                            | -3.299 | 0.995  | -0.886 | 6                                            | 3.279  | 1.041  | -0.843 |
| 6                                            | -2.996 | -0.775 | 0.725  | 6                                            | 3.023  | -0.805 | 0.690  |
| 6                                            | -3.809 | 0.193  | 0.139  | 6                                            | 3.813  | 0.204  | 0.141  |
| 6                                            | -5.649 | -0.367 | 1.520  | 6                                            | 5.676  | -0.384 | 1.479  |
| 1                                            | 0.312  | -0.135 | -2.278 | 1                                            | -0.312 | -0.136 | -2.265 |
| 1                                            | 3.537  | 1.798  | 0.765  | 1                                            | -3.143 | -3.165 | 0.162  |
| 1                                            | 3.138  | -3.162 | 0.166  | 1                                            | -3.548 | 1.794  | 0.759  |
| 1                                            | -1.607 | 1.458  | -2.106 | 1                                            | 1.567  | 1.527  | -2.025 |
| 1                                            | -1.070 | -1.701 | 0.744  | 1                                            | 1.116  | -1.767 | 0.682  |
| 1                                            | 5.319  | 0.266  | 1.599  | 1                                            | -5.142 | -2.173 | 1.289  |
| 1                                            | 5.130  | -2.169 | 1.307  | 1                                            | -5.335 | 0.261  | 1.580  |
| 1                                            | -3.945 | 1.742  | -1.333 | 1                                            | 3.908  | 1.819  | -1.262 |
| 1                                            | -3.369 | -1.413 | 1.517  | 1                                            | 3.416  | -1.470 | 1.448  |
| 1                                            | -5.648 | -1.430 | 1.252  | 1                                            | 5.138  | -0.307 | 2.431  |
| 1                                            | -6.676 | -0.031 | 1.650  | 1                                            | 6.698  | -0.035 | 1.616  |
| 1                                            | -5.104 | -0.237 | 2.462  | 1                                            | 5.693  | -1.434 | 1.163  |
| 8                                            | 2.827  | 3.863  | 0.466  | 8                                            | -2.840 | 3.861  | 0.459  |
| 1                                            | 2.074  | 3.387  | 0.079  | 1                                            | -2.473 | 4.677  | 0.802  |
| 1                                            | 2.454  | 4.678  | 0.806  | 1                                            | -2.083 | 3.385  | 0.082  |
| Anisindione<br>motif 3, Eint = -5.1 kcal/mol |        |        |        | Anisindione<br>motif 4, Eint = -5.1 kcal/mol |        |        |        |
| 8                                            | 1.103  | 2.379  | -0.091 | 8                                            | 1.124  | 2.367  | -0.321 |
| 8                                            | 1.699  | -2.173 | -1.287 | 8                                            | 1.746  | -2.270 | -1.111 |
| 8                                            | -4.528 | -0.480 | 0.446  | 8                                            | -4.522 | -0.434 | 0.316  |
| 6                                            | 0.903  | 0.132  | -1.057 | 6                                            | 0.946  | 0.046  | -1.095 |
| 6                                            | 1.574  | 1.283  | -0.284 | 6                                            | 1.597  | 1.258  | -0.404 |
| 6                                            | 1.873  | -1.039 | -0.901 | 6                                            | 1.910  | -1.108 | -0.813 |
| 6                                            | 2.899  | 0.801  | 0.168  | 6                                            | 2.906  | 0.816  | 0.127  |
| 6                                            | 3.074  | -0.536 | -0.194 | 6                                            | 3.089  | -0.546 | -0.115 |
| 6                                            | -0.531 | -0.103 | -0.667 | 6                                            | -0.498 | -0.156 | -0.724 |
| 6                                            | 3.889  | 1.496  | 0.856  | 6                                            | 3.877  | 1.567  | 0.784  |
| 6                                            | 4.247  | -1.217 | 0.120  | 6                                            | 4.250  | -1.198 | 0.291  |
| 6                                            | -1.505 | 0.823  | -1.057 | 6                                            | -1.457 | 0.747  | -1.200 |
| 6                                            | -0.922 | -1.181 | 0.121  | 6                                            | -0.916 | -1.177 | 0.124  |
| 6                                            | 5.059  | 0.817  | 1.171  | 6                                            | 5.036  | 0.917  | 1.190  |
| 6                                            | 5.236  | -0.525 | 0.806  | 6                                            | 5.220  | -0.451 | 0.946  |
| 6                                            | -2.827 | 0.677  | -0.677 | 6                                            | -2.788 | 0.632  | -0.841 |
| 6                                            | -2.249 | -1.344 | 0.513  | 6                                            | -2.253 | -1.307 | 0.495  |
| 6                                            | -3.201 | -0.411 | 0.114  | 6                                            | -3.190 | -0.397 | 0.012  |
| 6                                            | -4.959 | -1.588 | 1.214  | 6                                            | -4.979 | -1.465 | 1.174  |
| 1                                            | 0.939  | 0.425  | -2.117 | 1                                            | 1.011  | 0.248  | -2.175 |
| 1                                            | 3.739  | 2.534  | 1.133  | 1                                            | 3.722  | 2.625  | 0.967  |
| 1                                            | 4.371  | -2.256 | -0.167 | 1                                            | 4.380  | -2.258 | 0.097  |
| 1                                            | -1.218 | 1.676  | -1.665 | 1                                            | -1.150 | 1.555  | -1.855 |
| 1                                            | -0.195 | -1.925 | 0.428  | 1                                            | -0.202 | -1.903 | 0.497  |
| 1                                            | 5.851  | 1.328  | 1.708  | 1                                            | 5.813  | 1.472  | 1.706  |
| 1                                            | 6.163  | -1.026 | 1.068  | 1                                            | 6.137  | -0.928 | 1.277  |
| 1                                            | -3.585 | 1.389  | -0.987 | 1                                            | -3.532 | 1.325  | -1.218 |
| 1                                            | -2.523 | -2.199 | 1.119  | 1                                            | -2.548 | -2.118 | 1.150  |
| 1                                            | -4.772 | -2.531 | 0.690  | 1                                            | -4.809 | -2.452 | 0.732  |
| 1                                            | -6.030 | -1.461 | 1.356  | 1                                            | -6.048 | -1.301 | 1.299  |
| 1                                            | -4.463 | -1.615 | 2.191  | 1                                            | -4.487 | -1.417 | 2.152  |
| 8                                            | -6.064 | 1.960  | 0.040  | 8                                            | -6.272 | 1.881  | 0.424  |
| 1                                            | -5.609 | 1.122  | 0.196  | 1                                            | -5.767 | 2.569  | 0.860  |
| 1                                            | -5.702 | 2.547  | 0.707  | 1                                            | -5.643 | 1.153  | 0.331  |
| Ethinamate<br>motif 1, Eint = -8.0 kcal/mol  |        |        |        | Ethinamate<br>motif 2, Eint = -6.6 kcal/mol  |        |        |        |
| 8                                            | 0.691  | 0.224  | -0.063 | 8                                            | 0.164  | 0.585  | 0.979  |
| 8                                            | 1.760  | -1.273 | 1.296  | 8                                            | 2.170  | 0.393  | -0.095 |
| 7                                            | 2.555  | 0.850  | 0.979  | 7                                            | 2.002  | 0.301  | 2.178  |
| 6                                            | -0.407 | -0.705 | -0.355 | 6                                            | -0.611 | 0.712  | -0.268 |
| 6                                            | -1.305 | 0.103  | -1.304 | 6                                            | -2.051 | 0.852  | 0.243  |
| 6                                            | -1.182 | -1.065 | 0.920  | 6                                            | -0.485 | -0.544 | -1.140 |
| 6                                            | -1.907 | 1.330  | -0.629 | 6                                            | -2.522 | -0.402 | 0.970  |

|                                              |        |        |        |                                              |        |        |        |
|----------------------------------------------|--------|--------|--------|----------------------------------------------|--------|--------|--------|
| 6                                            | -1.762 | 0.171  | 1.596  | 6                                            | -0.936 | -1.795 | -0.399 |
| 6                                            | -2.657 | 0.955  | 0.643  | 6                                            | -2.366 | -1.649 | 0.107  |
| 6                                            | 0.108  | -1.889 | -1.033 | 6                                            | -0.199 | 1.915  | -0.981 |
| 6                                            | 1.694  | -0.181 | 0.786  | 6                                            | 1.501  | 0.437  | 0.918  |
| 6                                            | 0.469  | -2.860 | -1.646 | 6                                            | 0.070  | 2.920  | -1.585 |
| 1                                            | -2.098 | -0.571 | -1.646 | 1                                            | -2.684 | 1.048  | -0.631 |
| 1                                            | -0.726 | 0.374  | -2.194 | 1                                            | -2.115 | 1.735  | 0.885  |
| 1                                            | -0.536 | -1.632 | 1.589  | 1                                            | 0.530  | -0.646 | -1.518 |
| 1                                            | -1.992 | -1.737 | 0.610  | 1                                            | -1.131 | -0.373 | -2.011 |
| 1                                            | -2.571 | 1.839  | -1.334 | 1                                            | -3.565 | -0.271 | 1.277  |
| 1                                            | -1.113 | 2.045  | -0.385 | 1                                            | -1.942 | -0.521 | 1.893  |
| 1                                            | -0.946 | 0.813  | 1.949  | 1                                            | -0.255 | -1.988 | 0.440  |
| 1                                            | -2.319 | -0.132 | 2.488  | 1                                            | -0.837 | -2.658 | -1.062 |
| 1                                            | -3.049 | 1.852  | 1.132  | 1                                            | -2.671 | -2.539 | 0.667  |
| 1                                            | -3.530 | 0.340  | 0.382  | 1                                            | -3.046 | -1.580 | -0.754 |
| 1                                            | 0.811  | -3.726 | -2.158 | 1                                            | 0.336  | 3.798  | -2.121 |
| 1                                            | 2.537  | 1.647  | 0.352  | 1                                            | 1.428  | 0.564  | 2.962  |
| 1                                            | 3.418  | 0.618  | 1.442  | 1                                            | 2.999  | 0.385  | 2.275  |
| 8                                            | 1.656  | 2.629  | -1.194 | 8                                            | 2.505  | -2.236 | -1.152 |
| 1                                            | 1.118  | 1.825  | -1.168 | 1                                            | 3.256  | -2.359 | -1.735 |
| 1                                            | 1.946  | 2.709  | -2.105 | 1                                            | 2.576  | -1.315 | -0.863 |
| Ethinamate<br>motif 3, Eint = -10.2 kcal/mol |        |        |        | Fenoprofen<br>motif 1, Eint = -4.9 kcal/mol  |        |        |        |
| 8                                            | -0.155 | -0.197 | -0.783 | 8                                            | -1.724 | 0.956  | 0.321  |
| 8                                            | -1.849 | 0.134  | 0.705  | 8                                            | 4.366  | -1.721 | -0.552 |
| 7                                            | -2.097 | -1.223 | -1.116 | 8                                            | 2.138  | -1.803 | -0.829 |
| 6                                            | 0.765  | 0.682  | -0.049 | 6                                            | 3.125  | 0.009  | 0.469  |
| 6                                            | 2.029  | 0.665  | -0.919 | 6                                            | 1.958  | 0.914  | 0.160  |
| 6                                            | 1.072  | 0.113  | 1.344  | 6                                            | 0.652  | 0.488  | 0.399  |
| 6                                            | 2.661  | -0.720 | -0.987 | 6                                            | 3.173  | -0.413 | 1.945  |
| 6                                            | 1.694  | -1.274 | 1.264  | 6                                            | 2.174  | 2.186  | -0.368 |
| 6                                            | 2.952  | -1.272 | 0.403  | 6                                            | -0.412 | 1.318  | 0.076  |
| 6                                            | 0.223  | 2.033  | 0.020  | 6                                            | 3.109  | -1.246 | -0.383 |
| 6                                            | -1.411 | -0.372 | -0.314 | 6                                            | 1.098  | 3.021  | -0.655 |
| 6                                            | -0.146 | 3.178  | 0.056  | 6                                            | -0.205 | 2.592  | -0.443 |
| 1                                            | 2.731  | 1.383  | -0.480 | 6                                            | -2.152 | -0.346 | 0.140  |
| 1                                            | 1.775  | 1.039  | -1.914 | 6                                            | -1.581 | -1.215 | -0.786 |
| 1                                            | 0.163  | 0.121  | 1.945  | 6                                            | -3.260 | -0.727 | 0.891  |
| 1                                            | 1.774  | 0.812  | 1.816  | 6                                            | -2.127 | -2.484 | -0.941 |
| 1                                            | 3.578  | -0.670 | -1.583 | 6                                            | -3.798 | -1.996 | 0.717  |
| 1                                            | 1.984  | -1.399 | -1.517 | 6                                            | -3.232 | -2.882 | -0.195 |
| 1                                            | 0.963  | -1.979 | 0.847  | 1                                            | 4.054  | 0.540  | 0.239  |
| 1                                            | 1.917  | -1.629 | 2.275  | 1                                            | 0.463  | -0.499 | 0.807  |
| 1                                            | 3.373  | -2.279 | 0.334  | 1                                            | 3.214  | 0.470  | 2.585  |
| 1                                            | 3.718  | -0.650 | 0.888  | 1                                            | 2.283  | -0.985 | 2.219  |
| 1                                            | -0.503 | 4.178  | 0.101  | 1                                            | 4.051  | -1.030 | 2.149  |
| 1                                            | -1.733 | -1.414 | -2.035 | 1                                            | 3.189  | 2.523  | -0.557 |
| 1                                            | -3.097 | -1.274 | -0.958 | 1                                            | 1.274  | 4.012  | -1.059 |
| 8                                            | -4.521 | -0.538 | 0.267  | 1                                            | -1.059 | 3.222  | -0.669 |
| 1                                            | -3.740 | -0.161 | 0.710  | 1                                            | -0.718 | -0.912 | -1.368 |
| 1                                            | -5.052 | -0.916 | 0.970  | 1                                            | -3.683 | -0.024 | 1.601  |
| Fenoprofen<br>motif 2, Eint = -4.9 kcal/mol  |        |        |        | Fenoprofen<br>motif 3, Eint = -10.3 kcal/mol |        |        |        |
| 8                                            | -2.262 | 1.551  | 0.254  | 8                                            | -1.408 | 2.007  | 0.246  |
| 8                                            | 3.341  | -2.056 | -0.659 | 8                                            | 3.226  | -1.620 | -1.539 |
| 8                                            | 1.150  | -1.732 | -1.014 | 8                                            | 1.318  | -2.329 | -0.605 |
| 6                                            | 2.394  | -0.118 | 0.331  | 6                                            | 2.691  | -0.713 | 0.585  |
| 6                                            | 1.370  | 0.952  | 0.046  | 6                                            | 1.995  | 0.609  | 0.309  |
| 6                                            | 0.018  | 0.720  | 0.292  | 6                                            | 0.609  | 0.687  | 0.428  |
| 6                                            | 2.408  | -0.549 | 1.806  | 6                                            | 2.321  | -1.312 | 1.938  |
| 6                                            | 1.772  | 2.188  | -0.459 | 6                                            | 2.719  | 1.732  | -0.092 |
| 6                                            | -0.919 | 1.706  | 0.002  | 6                                            | -0.042 | 1.877  | 0.123  |
| 6                                            | 2.178  | -1.347 | -0.524 | 6                                            | 2.319  | -1.650 | -0.543 |
| 6                                            | 0.829  | 3.180  | -0.716 | 6                                            | 2.056  | 2.927  | -0.358 |
| 6                                            | -0.520 | 2.944  | -0.495 | 6                                            | 0.673  | 3.008  | -0.260 |
| 6                                            | -2.861 | 0.316  | 0.134  | 6                                            | -2.206 | 0.922  | -0.039 |
| 6                                            | -2.479 | -0.624 | -0.820 | 6                                            | -1.966 | 0.096  | -1.136 |
| 6                                            | -3.946 | 0.077  | 0.973  | 6                                            | -3.311 | 0.713  | 0.779  |
| 6                                            | -3.188 | -1.816 | -0.916 | 6                                            | -2.839 | -0.952 | -1.403 |
| 6                                            | -4.649 | -1.115 | 0.859  | 6                                            | -4.178 | -0.337 | 0.500  |
| 6                                            | -4.273 | -2.069 | -0.082 | 6                                            | -3.945 | -1.178 | -0.586 |
| 1                                            | 3.392  | 0.268  | 0.096  | 1                                            | 3.771  | -0.545 | 0.526  |
| 1                                            | -0.312 | -0.235 | 0.683  | 1                                            | 0.034  | -0.177 | 0.750  |
| 1                                            | 2.598  | 0.321  | 2.438  | 1                                            | 2.590  | -0.619 | 2.737  |
| 1                                            | 1.447  | -0.979 | 2.101  | 1                                            | 1.250  | -1.512 | 2.007  |
| 1                                            | 3.194  | -1.281 | 1.997  | 1                                            | 2.848  | -2.253 | 2.109  |
| 1                                            | 2.825  | 2.373  | -0.648 | 1                                            | 3.798  | 1.670  | -0.194 |

|                                                 |        |        |        |                                                 |        |        |        |
|-------------------------------------------------|--------|--------|--------|-------------------------------------------------|--------|--------|--------|
| 1                                               | 1.147  | 4.142  | -1.103 | 1                                               | 2.622  | 3.803  | -0.659 |
| 1                                               | -1.272 | 3.697  | -0.699 | 1                                               | 0.139  | 3.926  | -0.477 |
| 1                                               | -1.633 | -0.433 | -1.471 | 1                                               | -1.100 | 0.271  | -1.765 |
| 1                                               | -4.223 | 0.832  | 1.700  | 1                                               | -3.471 | 1.371  | 1.625  |
| 1                                               | -2.887 | -2.550 | -1.657 | 1                                               | -2.652 | -1.595 | -2.256 |
| 1                                               | -5.494 | -1.300 | 1.514  | 1                                               | -5.036 | -0.505 | 1.143  |
| 1                                               | 3.120  | -2.851 | -1.164 | 1                                               | 2.892  | -2.199 | -2.240 |
| 1                                               | -4.820 | -3.002 | -0.165 | 1                                               | -4.621 | -1.999 | -0.796 |
| 8                                               | 5.589  | -0.708 | 0.600  | 8                                               | -0.935 | -2.270 | 1.238  |
| 1                                               | 6.486  | -0.773 | 0.267  | 1                                               | -0.289 | -2.432 | 0.536  |
| 1                                               | 5.085  | -1.343 | 0.078  | 1                                               | -1.757 | -2.093 | 0.770  |
| Fenoprofen<br>motif 4, Eint = -11.5 kcal/mol    |        |        |        | Acetazolamide<br>motif 1, Eint = -11.9 kcal/mol |        |        |        |
| 8                                               | -2.265 | 1.505  | -0.038 | 16                                              | 2.584  | -0.563 | -0.001 |
| 8                                               | 3.873  | -1.220 | 0.069  | 16                                              | -0.367 | -1.503 | 0.026  |
| 8                                               | 1.659  | -1.408 | -0.288 | 8                                               | 2.676  | -1.933 | 0.457  |
| 6                                               | 2.538  | 0.608  | 0.736  | 8                                               | 3.131  | -0.109 | -1.259 |
| 6                                               | 1.416  | 1.440  | 0.167  | 8                                               | -3.697 | 1.370  | 0.746  |
| 6                                               | 0.087  | 1.053  | 0.343  | 7                                               | -2.895 | -0.509 | -0.298 |
| 6                                               | 2.423  | 0.420  | 2.255  | 7                                               | 0.312  | 0.949  | -0.262 |
| 6                                               | 1.698  | 2.609  | -0.539 | 7                                               | 3.188  | 0.415  | 1.164  |
| 6                                               | -0.936 | 1.815  | -0.209 | 7                                               | -1.037 | 0.967  | -0.369 |
| 6                                               | 2.618  | -0.768 | 0.100  | 6                                               | 0.808  | -0.238 | -0.076 |
| 6                                               | 0.665  | 3.382  | -1.061 | 6                                               | -1.546 | -0.232 | -0.245 |
| 6                                               | -0.656 | 2.988  | -0.907 | 6                                               | -3.919 | 0.332  | 0.183  |
| 6                                               | -2.678 | 0.192  | 0.001  | 6                                               | -5.294 | -0.206 | -0.109 |
| 6                                               | -2.063 | -0.822 | -0.731 | 1                                               | -3.162 | -1.424 | -0.629 |
| 6                                               | -3.816 | -0.070 | 0.759  | 1                                               | 3.081  | 1.411  | 0.915  |
| 6                                               | -2.595 | -2.105 | -0.687 | 1                                               | 2.858  | 0.179  | 2.092  |
| 6                                               | -4.339 | -1.356 | 0.787  | 1                                               | -5.608 | 0.139  | -1.097 |
| 6                                               | -3.731 | -2.381 | 0.068  | 1                                               | -5.995 | 0.189  | 0.623  |
| 1                                               | 3.489  | 1.109  | 0.527  | 1                                               | -5.341 | -1.297 | -0.106 |
| 1                                               | -0.151 | 0.145  | 0.884  | 8                                               | 2.494  | 2.892  | -0.086 |
| 1                                               | 2.398  | 1.392  | 2.752  | 1                                               | 2.960  | 2.892  | -0.927 |
| 1                                               | 1.507  | -0.114 | 2.517  | 1                                               | 1.623  | 2.516  | -0.296 |
| 1                                               | 3.272  | -0.145 | 2.647  |                                                 |        |        |        |
| 1                                               | 2.731  | 2.914  | -0.679 |                                                 |        |        |        |
| 1                                               | 0.892  | 4.293  | -1.604 |                                                 |        |        |        |
| 1                                               | -1.476 | 3.568  | -1.314 |                                                 |        |        |        |
| 1                                               | -1.175 | -0.613 | -1.317 |                                                 |        |        |        |
| 1                                               | -4.276 | 0.742  | 1.311  |                                                 |        |        |        |
| 1                                               | -2.116 | -2.895 | -1.257 |                                                 |        |        |        |
| 1                                               | -5.227 | -1.558 | 1.378  |                                                 |        |        |        |
| 1                                               | 3.859  | -2.135 | -0.300 |                                                 |        |        |        |
| 1                                               | -4.139 | -3.386 | 0.095  |                                                 |        |        |        |
| 8                                               | 3.145  | -3.592 | -1.057 |                                                 |        |        |        |
| 1                                               | 3.053  | -4.469 | -0.680 |                                                 |        |        |        |
| 1                                               | 2.287  | -3.152 | -0.929 |                                                 |        |        |        |
| Acetazolamide<br>motif 2, Eint = -11.8 kcal/mol |        |        |        | Acetazolamide<br>motif 3, Eint = -8.8 kcal/mol  |        |        |        |
| 16                                              | -2.582 | -0.550 | -0.197 | 16                                              | -3.072 | 0.001  | 0.004  |
| 16                                              | 0.355  | -1.504 | 0.039  | 16                                              | -0.348 | -1.450 | 0.302  |
| 8                                               | -2.992 | 0.101  | -1.419 | 8                                               | -3.503 | -1.012 | -0.930 |
| 8                                               | -2.707 | -1.975 | 0.029  | 8                                               | -3.475 | 0.004  | 1.390  |
| 8                                               | 3.761  | 1.364  | -0.712 | 8                                               | 3.263  | 0.206  | -1.468 |
| 7                                               | 2.881  | -0.501 | 0.300  | 7                                               | 2.335  | -0.859 | 0.335  |
| 7                                               | -0.310 | 0.969  | 0.041  | 7                                               | -0.578 | 1.061  | -0.189 |
| 7                                               | -3.324 | 0.234  | 1.034  | 7                                               | -3.461 | 1.474  | -0.634 |
| 7                                               | 1.036  | 0.992  | 0.178  | 7                                               | 0.753  | 0.855  | -0.065 |
| 6                                               | -0.812 | -0.228 | -0.028 | 6                                               | -1.273 | -0.023 | -0.008 |
| 6                                               | 1.538  | -0.216 | 0.189  | 6                                               | 1.048  | -0.394 | 0.193  |
| 6                                               | 3.940  | 0.321  | -0.142 | 6                                               | 3.421  | -0.425 | -0.455 |
| 6                                               | 5.290  | -0.245 | 0.205  | 6                                               | 4.748  | -0.824 | 0.117  |
| 1                                               | 3.124  | -1.415 | 0.652  | 1                                               | 2.529  | -1.464 | 1.119  |
| 1                                               | -3.100 | -0.155 | 1.943  | 1                                               | -3.085 | 2.237  | -0.079 |
| 1                                               | -3.194 | 1.255  | 0.969  | 1                                               | -3.168 | 1.555  | -1.602 |
| 1                                               | 5.557  | 0.061  | 1.220  | 1                                               | 5.015  | -0.086 | 0.880  |
| 1                                               | 6.034  | 0.163  | -0.475 | 1                                               | 5.503  | -0.808 | -0.665 |
| 1                                               | 5.322  | -1.336 | 0.168  | 1                                               | 4.730  | -1.808 | 0.589  |
| 8                                               | -2.482 | 2.885  | 0.371  | 8                                               | 3.231  | 2.205  | 0.884  |
| 1                                               | -1.604 | 2.527  | 0.152  | 1                                               | 2.359  | 2.012  | 0.506  |
| 1                                               | -2.854 | 3.140  | -0.478 | 1                                               | 3.706  | 2.591  | 0.144  |
| Acetazolamide<br>motif 4, Eint = -7.2 kcal/mol  |        |        |        | Acetazolamide<br>motif 5, Eint = -8.1 kcal/mol  |        |        |        |
| 16                                              | 3.310  | 0.142  | 0.133  | 16                                              | 2.590  | -0.417 | -0.010 |
| 16                                              | 0.606  | -1.356 | 0.369  | 16                                              | -0.140 | 1.091  | 0.031  |
| 8                                               | 3.585  | -0.067 | 1.536  | 8                                               | 2.998  | 0.053  | -1.318 |
| 8                                               | 3.889  | -0.684 | -0.902 | 8                                               | 3.090  | 0.199  | 1.203  |
| 8                                               | -3.248 | 0.877  | 0.060  | 8                                               | -3.991 | -1.268 | -0.581 |
| 7                                               | -2.026 | -1.022 | -0.292 | 7                                               | -2.795 | 0.519  | 0.228  |
| 7                                               | 0.845  | 1.009  | -0.604 | 7                                               | 0.117  | -1.466 | 0.145  |
| 7                                               | 3.668  | 1.715  | -0.222 | 7                                               | 2.950  | -2.027 | 0.067  |
| 7                                               | -0.472 | 0.721  | -0.743 | 7                                               | -1.221 | -1.266 | 0.220  |
| 6                                               | 1.527  | 0.043  | -0.067 | 6                                               | 0.799  | -0.363 | 0.056  |

|                                                 |        |        |        |                                                |        |        |        |
|-------------------------------------------------|--------|--------|--------|------------------------------------------------|--------|--------|--------|
| 6                                               | -0.761 | -0.468 | -0.290 | 6                                              | -1.517 | 0.007  | 0.173  |
| 6                                               | -3.226 | -0.317 | -0.132 | 6                                              | -3.981 | -0.153 | -0.133 |
| 6                                               | -4.450 | -1.179 | -0.231 | 6                                              | -5.211 | 0.673  | 0.132  |
| 1                                               | -2.086 | -2.028 | -0.337 | 1                                              | -2.879 | 1.492  | 0.482  |
| 1                                               | 3.389  | 1.957  | -1.168 | 1                                              | 2.612  | -2.437 | 0.933  |
| 1                                               | 3.247  | 2.353  | 0.446  | 1                                              | 2.559  | -2.527 | -0.726 |
| 1                                               | -4.970 | -0.937 | -1.161 | 1                                              | -5.526 | 0.524  | 1.169  |
| 1                                               | -5.137 | -0.920 | 0.576  | 1                                              | -6.016 | 0.332  | -0.515 |
| 1                                               | -4.239 | -2.249 | -0.217 | 1                                              | -5.053 | 1.743  | -0.017 |
| 8                                               | -5.998 | 1.384  | 0.547  | 8                                              | 2.346  | 2.762  | -0.209 |
| 1                                               | -6.294 | 2.237  | 0.869  | 1                                              | 2.795  | 2.352  | -0.956 |
| 1                                               | -5.046 | 1.492  | 0.398  | 1                                              | 2.867  | 2.466  | 0.545  |
| Acetazolamide<br>motif 6, Eint = -9.7 kcal/mol  |        |        |        | Carbamazepine<br>motif 1, Eint = -8.1 kcal/mol |        |        |        |
| 16                                              | -3.032 | 0.132  | 0.001  | 8                                              | -1.440 | 1.954  | 1.163  |
| 16                                              | -0.072 | 1.035  | 0.007  | 7                                              | 0.078  | 0.567  | 0.151  |
| 8                                               | -3.340 | 0.760  | 1.266  | 7                                              | 0.755  | 2.536  | 1.207  |
| 8                                               | -3.342 | 0.760  | -1.264 | 6                                              | -0.930 | -0.387 | -0.188 |
| 8                                               | 3.328  | -2.132 | 0.010  | 6                                              | 1.422  | 0.288  | -0.237 |
| 7                                               | 2.427  | -0.013 | -0.003 | 6                                              | -0.897 | -1.661 | 0.408  |
| 7                                               | -0.813 | -1.426 | -0.008 | 6                                              | 2.112  | -0.782 | 0.363  |
| 7                                               | -3.735 | -1.366 | 0.000  | 6                                              | 0.179  | -2.107 | 1.273  |
| 7                                               | 0.543  | -1.488 | -0.010 | 6                                              | 1.475  | -1.726 | 1.264  |
| 6                                               | -1.273 | -0.213 | 0.000  | 6                                              | -1.963 | -0.022 | -1.041 |
| 6                                               | 1.087  | -0.300 | -0.003 | 6                                              | 2.054  | 1.110  | -1.169 |
| 6                                               | 3.484  | -0.938 | 0.003  | 6                                              | -1.964 | -2.534 | 0.137  |
| 6                                               | 4.837  | -0.272 | -0.001 | 6                                              | 3.470  | -0.946 | 0.039  |
| 1                                               | 2.665  | 0.975  | -0.005 | 6                                              | -0.281 | 1.696  | 0.870  |
| 1                                               | -3.479 | -1.891 | -0.831 | 6                                              | -3.005 | -0.903 | -1.292 |
| 1                                               | -3.481 | -1.890 | 0.832  | 6                                              | 3.392  | 0.916  | -1.484 |
| 1                                               | 5.390  | -0.609 | -0.880 | 6                                              | -3.004 | -2.164 | -0.701 |
| 1                                               | 5.396  | -0.610 | 0.873  | 6                                              | 4.103  | -0.113 | -0.869 |
| 1                                               | 4.798  | 0.818  | -0.001 | 1                                              | -0.084 | -2.924 | 1.942  |
| 8                                               | 2.775  | 2.869  | -0.004 | 1                                              | 2.153  | -2.264 | 1.922  |
| 1                                               | 2.626  | 3.435  | -0.766 | 1                                              | -1.976 | 0.976  | -1.464 |
| 1                                               | 2.632  | 3.435  | 0.759  | 1                                              | 1.488  | 1.921  | -1.615 |
|                                                 |        |        |        | 1                                              | -1.960 | -3.516 | 0.601  |
|                                                 |        |        |        | 1                                              | 4.020  | -1.757 | 0.508  |
|                                                 |        |        |        | 1                                              | -3.830 | -0.588 | -1.921 |
|                                                 |        |        |        | 1                                              | 3.880  | 1.569  | -2.200 |
|                                                 |        |        |        | 1                                              | -3.820 | -2.854 | -0.885 |
|                                                 |        |        |        | 1                                              | 5.152  | -0.266 | -1.102 |
|                                                 |        |        |        | 1                                              | 0.506  | 3.203  | 1.920  |
|                                                 |        |        |        | 1                                              | 1.692  | 2.164  | 1.265  |
|                                                 |        |        |        | 8                                              | -3.893 | 2.234  | -0.294 |
|                                                 |        |        |        | 1                                              | -3.117 | 2.067  | 0.265  |
|                                                 |        |        |        | 1                                              | -4.254 | 3.050  | 0.058  |
| Carbamazepine<br>motif 2, Eint = -10.6 kcal/mol |        |        |        | Acetaminophen<br>motif 1, Eint = -5.0 kcal/mol |        |        |        |
| 8                                               | -1.308 | 2.274  | 0.008  | 8                                              | 3.252  | 1.044  | -0.063 |
| 7                                               | -0.028 | 0.400  | -0.230 | 8                                              | -3.326 | 1.156  | 0.045  |
| 7                                               | 0.958  | 2.491  | 0.120  | 7                                              | -2.028 | -0.730 | -0.012 |
| 6                                               | -1.187 | -0.426 | -0.332 | 6                                              | -0.721 | -0.209 | -0.021 |
| 6                                               | 1.250  | -0.224 | -0.334 | 6                                              | -0.434 | 1.158  | 0.021  |
| 6                                               | -1.437 | -1.390 | 0.660  | 6                                              | 0.337  | -1.124 | -0.073 |
| 6                                               | 1.682  | -1.103 | 0.677  | 6                                              | 0.891  | 1.581  | 0.008  |
| 6                                               | -0.520 | -1.661 | 1.753  | 6                                              | 1.655  | -0.703 | -0.082 |
| 6                                               | 0.824  | -1.531 | 1.767  | 6                                              | 1.930  | 0.661  | -0.044 |
| 6                                               | -2.082 | -0.232 | -1.379 | 6                                              | -3.228 | -0.057 | 0.019  |
| 6                                               | 2.082  | 0.083  | -1.410 | 6                                              | -4.440 | -0.958 | 0.020  |
| 6                                               | -2.633 | -2.122 | 0.574  | 1                                              | -1.242 | 1.873  | 0.062  |
| 6                                               | 2.992  | -1.603 | 0.594  | 1                                              | 0.121  | -2.189 | -0.101 |
| 6                                               | -0.191 | 1.765  | -0.019 | 1                                              | -2.082 | -1.737 | -0.034 |
| 6                                               | -3.250 | -0.978 | -1.448 | 1                                              | 1.109  | 2.645  | 0.038  |
| 6                                               | 3.368  | -0.436 | -1.476 | 1                                              | 2.474  | -1.414 | -0.114 |
| 6                                               | -3.527 | -1.925 | -0.464 | 1                                              | -5.066 | -0.708 | -0.838 |
| 6                                               | 3.826  | -1.277 | -0.463 | 1                                              | -5.031 | -0.754 | 0.915  |
| 1                                               | -0.977 | -2.118 | 2.628  | 1                                              | -4.210 | -2.024 | -0.012 |
| 1                                               | 1.346  | -1.895 | 2.650  | 1                                              | 3.306  | 1.997  | 0.047  |
| 1                                               | -1.867 | 0.535  | -2.114 | 8                                              | 4.911  | -1.315 | 0.187  |
| 1                                               | 1.716  | 0.763  | -2.173 | 1                                              | 4.559  | -0.417 | 0.124  |
| 1                                               | -2.845 | -2.859 | 1.344  | 1                                              | 5.629  | -1.335 | -0.448 |
| 1                                               | 3.343  | -2.268 | 1.378  |                                                |        |        |        |
| 1                                               | -3.951 | -0.809 | -2.258 |                                                |        |        |        |
| 1                                               | 4.013  | -0.179 | -2.309 |                                                |        |        |        |
| 1                                               | -4.443 | -2.504 | -0.507 |                                                |        |        |        |
| 1                                               | 4.833  | -1.679 | -0.503 |                                                |        |        |        |
| 1                                               | 0.813  | 3.430  | 0.478  |                                                |        |        |        |
| 1                                               | 1.810  | 2.022  | 0.385  |                                                |        |        |        |
| 8                                               | -0.615 | 4.745  | 1.028  |                                                |        |        |        |
| 1                                               | -1.153 | 4.007  | 0.682  |                                                |        |        |        |
| 1                                               | -0.963 | 5.531  | 0.604  |                                                |        |        |        |
| Acetaminophen<br>motif 2, Eint = -6.8 kcal/mol  |        |        |        | Acetaminophen<br>motif 3, Eint = -7.9 kcal/mol |        |        |        |

|                                            |        |        |        |                                            |        |        |        |
|--------------------------------------------|--------|--------|--------|--------------------------------------------|--------|--------|--------|
| 8                                          | 4.023  | 0.192  | -0.087 | 8                                          | 4.458  | -0.768 | 0.000  |
| 8                                          | -2.418 | 0.804  | -0.214 | 8                                          | -2.116 | -0.786 | -0.001 |
| 7                                          | -1.363 | -1.183 | 0.202  | 7                                          | -0.796 | 1.075  | 0.000  |
| 6                                          | -0.006 | -0.786 | 0.149  | 6                                          | 0.505  | 0.532  | 0.000  |
| 6                                          | 0.413  | 0.480  | 0.553  | 6                                          | 0.773  | -0.839 | 0.000  |
| 6                                          | 0.941  | -1.708 | -0.302 | 6                                          | 1.576  | 1.433  | 0.000  |
| 6                                          | 1.754  | 0.824  | 0.468  | 6                                          | 2.090  | -1.281 | 0.000  |
| 6                                          | 2.285  | -1.375 | -0.362 | 6                                          | 2.886  | 0.988  | 0.001  |
| 6                                          | 2.695  | -0.096 | 0.013  | 6                                          | 3.151  | -0.380 | 0.000  |
| 6                                          | -2.466 | -0.400 | -0.007 | 6                                          | -2.004 | 0.435  | 0.000  |
| 6                                          | -3.780 | -1.134 | 0.050  | 6                                          | -3.202 | 1.346  | 0.000  |
| 1                                          | -0.296 | 1.205  | 0.926  | 1                                          | -0.045 | -1.544 | -0.001 |
| 1                                          | 0.621  | -2.698 | -0.617 | 1                                          | 1.377  | 2.501  | 0.001  |
| 1                                          | -1.527 | -2.177 | 0.266  | 1                                          | -0.833 | 2.084  | 0.000  |
| 1                                          | 2.062  | 1.825  | 0.759  | 1                                          | 2.291  | -2.350 | -0.001 |
| 1                                          | 3.023  | -2.087 | -0.712 | 1                                          | 3.713  | 1.689  | 0.001  |
| 1                                          | -4.325 | -0.957 | -0.878 | 1                                          | -3.821 | 1.122  | 0.871  |
| 1                                          | -4.384 | -0.719 | 0.858  | 1                                          | -3.821 | 1.123  | -0.872 |
| 1                                          | -3.683 | -2.210 | 0.205  | 1                                          | -2.951 | 2.407  | 0.000  |
| 1                                          | 4.163  | 1.105  | 0.182  | 1                                          | 4.498  | -1.729 | 0.000  |
| 8                                          | -0.879 | 3.233  | -0.327 | 8                                          | -4.894 | -1.286 | 0.001  |
| 1                                          | -1.544 | 3.923  | -0.344 | 1                                          | -5.153 | -2.209 | 0.002  |
| 1                                          | -1.392 | 2.416  | -0.421 | 1                                          | -3.921 | -1.305 | 0.000  |
| Clonidine<br>motif 1, Eint = -8.4 kcal/mol |        |        |        | Clonidine<br>motif 2, Eint = -3.4 kcal/mol |        |        |        |
| 17                                         | -0.259 | 2.451  | -0.100 | 17                                         | -0.785 | -1.908 | -0.758 |
| 17                                         | 1.842  | -2.523 | -0.502 | 17                                         | 0.370  | 3.348  | -0.119 |
| 7                                          | -2.615 | -1.044 | -0.263 | 7                                          | 3.173  | -0.389 | -0.659 |
| 7                                          | -0.350 | -0.476 | -0.678 | 7                                          | 0.991  | 0.510  | -0.833 |
| 7                                          | -1.332 | -0.260 | 1.474  | 7                                          | 1.670  | -0.803 | 1.023  |
| 6                                          | -3.590 | -0.735 | 0.790  | 6                                          | 3.800  | -1.466 | 0.118  |
| 6                                          | -2.675 | -0.489 | 2.008  | 6                                          | 2.904  | -1.504 | 1.373  |
| 6                                          | -1.412 | -0.569 | 0.237  | 6                                          | 1.901  | -0.252 | -0.105 |
| 6                                          | 0.888  | -0.005 | -0.210 | 6                                          | -0.298 | 0.728  | -0.326 |
| 6                                          | 1.068  | 1.347  | 0.112  | 6                                          | -1.232 | -0.311 | -0.214 |
| 6                                          | 2.008  | -0.836 | -0.095 | 6                                          | -0.740 | 2.008  | 0.031  |
| 6                                          | 2.284  | 1.837  | 0.561  | 6                                          | -2.515 | -0.103 | 0.271  |
| 6                                          | 3.242  | -0.361 | 0.328  | 6                                          | -2.025 | 2.248  | 0.494  |
| 6                                          | 3.370  | 0.978  | 0.668  | 6                                          | -2.905 | 1.183  | 0.626  |
| 1                                          | -4.294 | -1.558 | 0.936  | 1                                          | 4.846  | -1.239 | 0.338  |
| 1                                          | -4.167 | 0.161  | 0.529  | 1                                          | 3.767  | -2.416 | -0.432 |
| 1                                          | -3.003 | 0.358  | 2.618  | 1                                          | 2.693  | -2.525 | 1.706  |
| 1                                          | -2.649 | -1.363 | 2.671  | 1                                          | 3.380  | -0.990 | 2.217  |
| 1                                          | -2.840 | -0.697 | -1.192 | 1                                          | 3.189  | -0.502 | -1.665 |
| 1                                          | -0.267 | -1.320 | -1.236 | 1                                          | 1.412  | 1.346  | -1.223 |
| 1                                          | 2.375  | 2.888  | 0.806  | 1                                          | -3.202 | -0.938 | 0.347  |
| 1                                          | 4.080  | -1.043 | 0.402  | 1                                          | -2.317 | 3.257  | 0.758  |
| 1                                          | 4.326  | 1.358  | 1.011  | 1                                          | -3.908 | 1.355  | 0.999  |
| 8                                          | -2.205 | 0.692  | -2.672 | 8                                          | -3.745 | -3.169 | 0.248  |
| 1                                          | -2.454 | 1.588  | -2.908 | 1                                          | -2.825 | -3.183 | -0.041 |
| 1                                          | -1.398 | 0.790  | -2.147 | 1                                          | -4.202 | -3.720 | -0.392 |
| Clonidine<br>motif 3, Eint = -8.4 kcal/mol |        |        |        | Clonidine<br>motif 4, Eint = -3.2 kcal/mol |        |        |        |
| 17                                         | -0.254 | -2.556 | -0.946 | 17                                         | -1.526 | 2.402  | -0.430 |
| 17                                         | -1.339 | 2.610  | 0.316  | 17                                         | 1.935  | -1.763 | -0.640 |
| 7                                          | 2.771  | 0.293  | -0.359 | 7                                          | -2.783 | -1.616 | -0.687 |
| 7                                          | 0.416  | 0.356  | -0.612 | 7                                          | -0.734 | -0.457 | -0.927 |
| 7                                          | 1.453  | -0.796 | 1.182  | 7                                          | -1.968 | -0.428 | 1.098  |
| 6                                          | 3.706  | -0.575 | 0.377  | 6                                          | -3.922 | -1.541 | 0.238  |
| 6                                          | 2.840  | -1.042 | 1.563  | 6                                          | -3.250 | -0.994 | 1.514  |
| 6                                          | 1.500  | -0.093 | 0.117  | 6                                          | -1.814 | -0.792 | -0.116 |
| 6                                          | -0.880 | -0.008 | -0.233 | 6                                          | 0.279  | 0.372  | -0.427 |
| 6                                          | -1.320 | -1.339 | -0.318 | 6                                          | 0.043  | 1.723  | -0.135 |
| 6                                          | -1.820 | 0.937  | 0.198  | 6                                          | 1.592  | -0.085 | -0.254 |
| 6                                          | -2.608 | -1.707 | 0.045  | 6                                          | 1.050  | 2.548  | 0.345  |
| 6                                          | -3.121 | 0.592  | 0.538  | 6                                          | 2.622  | 0.725  | 0.198  |
| 6                                          | -3.507 | -0.739 | 0.472  | 6                                          | 2.334  | 2.047  | 0.511  |
| 1                                          | 4.600  | -0.026 | 0.679  | 1                                          | -4.386 | -2.520 | 0.377  |
| 1                                          | 4.022  | -1.419 | -0.247 | 1                                          | -4.689 | -0.854 | -0.142 |
| 1                                          | 2.999  | -2.098 | 1.804  | 1                                          | -3.864 | -0.242 | 2.020  |
| 1                                          | 3.069  | -0.475 | 2.474  | 1                                          | -3.068 | -1.794 | 2.242  |
| 1                                          | 2.846  | 0.228  | -1.369 | 1                                          | -2.989 | -1.416 | -1.658 |
| 1                                          | 0.538  | 1.304  | -0.971 | 1                                          | -0.389 | -1.244 | -1.463 |
| 1                                          | -2.900 | -2.747 | -0.031 | 1                                          | 0.821  | 3.584  | 0.567  |
| 1                                          | -3.808 | 1.362  | 0.866  | 1                                          | 3.618  | 0.315  | 0.324  |
| 1                                          | -4.516 | -1.023 | 0.748  | 1                                          | 3.122  | 2.694  | 0.879  |
| 8                                          | 1.857  | 2.852  | -1.231 | 8                                          | 5.013  | -1.496 | 0.684  |
| 1                                          | 1.670  | 3.669  | -0.763 | 1                                          | 5.344  | -1.925 | 1.477  |
| 1                                          | 2.474  | 2.365  | -0.664 | 1                                          | 4.228  | -2.002 | 0.449  |
| Clonidine<br>motif 5, Eint = -6.4 kcal/mol |        |        |        | Clonidine<br>motif 6, Eint = -9.8 kcal/mol |        |        |        |
| 17                                         | -0.746 | -2.695 | -0.520 | 17                                         | -0.275 | 2.160  | -1.291 |
| 17                                         | -0.988 | 2.714  | -0.371 | 17                                         | 1.610  | -2.728 | 0.101  |
| 7                                          | 2.662  | -0.132 | -0.854 | 7                                          | -2.765 | -1.219 | -0.703 |

|                                                         |        |        |        |                                                        |        |        |        |
|---------------------------------------------------------|--------|--------|--------|--------------------------------------------------------|--------|--------|--------|
| 7                                                       | 0.303  | 0.084  | -0.958 | 7                                                      | -0.446 | -0.823 | -0.940 |
| 7                                                       | 1.410  | -0.722 | 0.978  | 7                                                      | -1.726 | 0.138  | 0.813  |
| 6                                                       | 3.602  | -0.882 | -0.004 | 6                                                      | -3.873 | -0.557 | -0.004 |
| 6                                                       | 2.807  | -1.000 | 1.311  | 6                                                      | -3.143 | 0.111  | 1.177  |
| 6                                                       | 1.419  | -0.294 | -0.224 | 6                                                      | -1.618 | -0.589 | -0.237 |
| 6                                                       | -0.966 | 0.006  | -0.361 | 6                                                      | 0.756  | -0.230 | -0.520 |
| 6                                                       | -1.569 | -1.230 | -0.091 | 6                                                      | 0.967  | 1.152  | -0.627 |
| 6                                                       | -1.705 | 1.155  | -0.054 | 6                                                      | 1.818  | -1.000 | -0.028 |
| 6                                                       | -2.830 | -1.312 | 0.485  | 6                                                      | 2.160  | 1.736  | -0.224 |
| 6                                                       | -2.976 | 1.093  | 0.498  | 6                                                      | 3.027  | -0.436 | 0.353  |
| 6                                                       | -3.530 | -0.148 | 0.776  | 6                                                      | 3.187  | 0.941  | 0.263  |
| 1                                                       | 4.545  | -0.341 | 0.107  | 1                                                      | -4.632 | -1.278 | 0.309  |
| 1                                                       | 3.819  | -1.865 | -0.439 | 1                                                      | -4.356 | 0.185  | -0.652 |
| 1                                                       | 2.909  | -1.984 | 1.775  | 1                                                      | -3.511 | 1.119  | 1.385  |
| 1                                                       | 3.149  | -0.263 | 2.049  | 1                                                      | -3.263 | -0.468 | 2.101  |
| 1                                                       | 2.670  | -0.377 | -1.838 | 1                                                      | -2.842 | -1.278 | -1.711 |
| 1                                                       | 0.450  | 0.940  | -1.482 | 1                                                      | -0.346 | -1.789 | -1.225 |
| 1                                                       | -3.257 | -2.286 | 0.685  | 1                                                      | 2.269  | 2.811  | -0.297 |
| 1                                                       | -3.509 | 2.010  | 0.718  | 1                                                      | 3.820  | -1.073 | 0.725  |
| 1                                                       | -4.518 | -0.211 | 1.217  | 1                                                      | 4.121  | 1.396  | 0.571  |
| 8                                                       | 2.775  | 2.612  | 0.419  | 8                                                      | 0.075  | 1.773  | 2.427  |
| 1                                                       | 2.033  | 2.380  | 0.984  | 1                                                      | -0.512 | 1.213  | 1.885  |
| 1                                                       | 2.867  | 1.843  | -0.161 | 1                                                      | 0.813  | 1.194  | 2.630  |
| 4-aminosalicylic acid<br>motif 1, Eint = -6.0 kcal/mol  |        |        |        | 4-aminosalicylic acid<br>motif 2, Eint = -3.9 kcal/mol |        |        |        |
| 8                                                       | 0.070  | 1.840  | -0.128 | 8                                                      | -0.741 | -2.524 | -0.299 |
| 8                                                       | -3.330 | -0.582 | 0.072  | 8                                                      | 2.626  | -0.097 | 0.343  |
| 8                                                       | -2.511 | 1.501  | -0.028 | 8                                                      | 1.841  | -2.170 | 0.030  |
| 7                                                       | 2.840  | -2.012 | -0.087 | 7                                                      | -3.558 | 1.277  | -0.071 |
| 6                                                       | -0.992 | -0.325 | -0.007 | 6                                                      | 0.288  | -0.373 | 0.115  |
| 6                                                       | 0.161  | 0.496  | -0.075 | 6                                                      | -0.843 | -1.202 | -0.117 |
| 6                                                       | 1.585  | -1.452 | -0.027 | 6                                                      | -2.303 | 0.722  | 0.027  |
| 6                                                       | 1.430  | -0.066 | -0.084 | 6                                                      | -2.117 | -0.647 | -0.160 |
| 6                                                       | -0.810 | -1.718 | 0.047  | 6                                                      | 0.075  | 1.006  | 0.308  |
| 6                                                       | 0.443  | -2.281 | 0.038  | 6                                                      | -1.185 | 1.551  | 0.265  |
| 6                                                       | -2.300 | 0.289  | 0.009  | 6                                                      | 1.598  | -0.973 | 0.153  |
| 1                                                       | 2.292  | 0.593  | -0.131 | 1                                                      | -2.960 | -1.305 | -0.344 |
| 1                                                       | -1.688 | -2.351 | 0.100  | 1                                                      | 0.924  | 1.653  | 0.494  |
| 1                                                       | 0.565  | -3.359 | 0.076  | 1                                                      | -1.327 | 2.617  | 0.411  |
| 1                                                       | 2.938  | -2.953 | 0.258  | 1                                                      | -3.692 | 2.180  | 0.356  |
| 1                                                       | 3.618  | -1.412 | 0.142  | 1                                                      | -4.345 | 0.657  | 0.042  |
| 1                                                       | -0.889 | 2.067  | -0.097 | 1                                                      | 0.210  | -2.756 | -0.225 |
| 1                                                       | -4.133 | -0.045 | 0.078  | 1                                                      | 3.426  | -0.639 | 0.381  |
| 8                                                       | 2.724  | 2.914  | 0.204  | 8                                                      | 2.998  | 2.731  | -0.394 |
| 1                                                       | 2.913  | 3.715  | -0.289 | 1                                                      | 2.935  | 1.776  | -0.266 |
| 1                                                       | 1.769  | 2.793  | 0.111  | 1                                                      | 2.861  | 2.851  | -1.336 |
| 4-aminosalicylic acid<br>motif 3, Eint = -11.5 kcal/mol |        |        |        | Clomiphene<br>motif 1, Eint = -4.7 kcal/mol            |        |        |        |
| 8                                                       | 0.106  | 2.231  | -0.001 | 17                                                     | -4.720 | 0.918  | 1.096  |
| 8                                                       | -2.099 | -1.333 | 0.003  | 8                                                      | 2.968  | -1.123 | -0.876 |
| 8                                                       | -2.155 | 0.914  | 0.000  | 7                                                      | 6.393  | -0.273 | 0.095  |
| 7                                                       | 4.138  | -0.263 | -0.057 | 6                                                      | 5.312  | -0.845 | -0.698 |
| 6                                                       | -0.054 | -0.182 | -0.003 | 6                                                      | 6.705  | -1.122 | 1.247  |
| 6                                                       | 0.691  | 1.026  | -0.003 | 6                                                      | 7.581  | -0.007 | -0.717 |
| 6                                                       | 2.761  | -0.229 | -0.001 | 6                                                      | 3.968  | -0.447 | -0.126 |
| 6                                                       | 2.081  | 0.989  | 0.000  | 6                                                      | 7.411  | -0.375 | 2.360  |
| 6                                                       | 0.654  | -1.397 | -0.004 | 6                                                      | 7.423  | 1.209  | -1.607 |
| 6                                                       | 2.027  | -1.435 | -0.003 | 6                                                      | -1.075 | -0.560 | -0.033 |
| 6                                                       | -1.501 | -0.142 | -0.001 | 6                                                      | 1.670  | -0.899 | -0.550 |
| 1                                                       | 2.623  | 1.929  | -0.003 | 6                                                      | -2.524 | -0.407 | 0.226  |
| 1                                                       | 0.085  | -2.320 | -0.004 | 6                                                      | -0.628 | -1.417 | -1.052 |
| 1                                                       | 2.555  | -2.383 | -0.010 | 6                                                      | -0.109 | 0.096  | 0.733  |
| 1                                                       | 4.580  | -1.113 | 0.255  | 6                                                      | 0.718  | -1.578 | -1.317 |
| 1                                                       | 4.624  | 0.570  | 0.236  | 6                                                      | 1.249  | -0.063 | 0.487  |
| 1                                                       | -0.864 | 2.076  | -0.004 | 6                                                      | -3.320 | -1.656 | 0.197  |
| 1                                                       | -3.074 | -1.185 | 0.001  | 6                                                      | -3.056 | 0.809  | 0.491  |
| 8                                                       | -4.618 | -0.289 | -0.076 | 6                                                      | -2.419 | 2.124  | 0.330  |
| 1                                                       | -4.060 | 0.506  | -0.026 | 6                                                      | -2.895 | -2.771 | 0.927  |
| 1                                                       | -5.260 | -0.206 | 0.633  | 6                                                      | -4.460 | -1.770 | -0.608 |
|                                                         |        |        |        | 6                                                      | -3.610 | -3.961 | 0.885  |
|                                                         |        |        |        | 6                                                      | -5.163 | -2.968 | -0.662 |
|                                                         |        |        |        | 6                                                      | -1.696 | 2.408  | -0.837 |
|                                                         |        |        |        | 6                                                      | -2.533 | 3.119  | 1.308  |
|                                                         |        |        |        | 6                                                      | -4.747 | -4.063 | 0.089  |
|                                                         |        |        |        | 6                                                      | -1.078 | 3.640  | -1.001 |
|                                                         |        |        |        | 6                                                      | -1.908 | 4.348  | 1.144  |
|                                                         |        |        |        | 6                                                      | -1.174 | 4.612  | -0.009 |
|                                                         |        |        |        | 1                                                      | 5.377  | -1.946 | -0.762 |
|                                                         |        |        |        | 1                                                      | 5.374  | -0.476 | -1.724 |
|                                                         |        |        |        | 1                                                      | 5.762  | -1.523 | 1.631  |
|                                                         |        |        |        | 1                                                      | 7.299  | -2.003 | 0.935  |
|                                                         |        |        |        | 1                                                      | 8.418  | 0.161  | -0.034 |
|                                                         |        |        |        | 1                                                      | 7.856  | -0.895 | -1.319 |
|                                                         |        |        |        | 1                                                      | 3.834  | 0.641  | -0.196 |

|    |                                             |        |        |    |                                             |        |        |  |
|----|---------------------------------------------|--------|--------|----|---------------------------------------------|--------|--------|--|
|    |                                             |        |        | 1  | 3.892                                       | -0.720 | 0.936  |  |
|    |                                             |        |        | 1  | 8.379                                       | 0.023  | 2.045  |  |
|    |                                             |        |        | 1  | 6.805                                       | 0.466  | 2.705  |  |
|    |                                             |        |        | 1  | 7.596                                       | -1.036 | 3.210  |  |
|    |                                             |        |        | 1  | 6.608                                       | 1.093  | -2.327 |  |
|    |                                             |        |        | 1  | 7.211                                       | 2.099  | -1.010 |  |
|    |                                             |        |        | 1  | 8.335                                       | 1.389  | -2.180 |  |
|    |                                             |        |        | 1  | -1.359                                      | -1.954 | -1.650 |  |
|    |                                             |        |        | 1  | -0.424                                      | 0.743  | 1.546  |  |
|    |                                             |        |        | 1  | 1.061                                       | -2.231 | -2.112 |  |
|    |                                             |        |        | 1  | 1.967                                       | 0.457  | 1.109  |  |
|    |                                             |        |        | 1  | -1.997                                      | -2.696 | 1.534  |  |
|    |                                             |        |        | 1  | -4.776                                      | -0.924 | -1.210 |  |
|    |                                             |        |        | 1  | -3.276                                      | -4.813 | 1.469  |  |
|    |                                             |        |        | 1  | -6.037                                      | -3.046 | -1.301 |  |
|    |                                             |        |        | 1  | -1.633                                      | 1.655  | -1.615 |  |
|    |                                             |        |        | 1  | -3.113                                      | 2.918  | 2.204  |  |
|    |                                             |        |        | 1  | -5.302                                      | -4.995 | 0.047  |  |
|    |                                             |        |        | 1  | -0.528                                      | 3.845  | -1.914 |  |
|    |                                             |        |        | 1  | -1.996                                      | 5.104  | 1.917  |  |
|    |                                             |        |        | 1  | -0.691                                      | 5.575  | -0.140 |  |
|    |                                             |        |        | 8  | -5.006                                      | 1.275  | -2.175 |  |
|    |                                             |        |        | 1  | -5.151                                      | 1.518  | -1.253 |  |
|    |                                             |        |        | 1  | -5.547                                      | 1.894  | -2.670 |  |
|    | Clomiphene<br>motif 2, Eint = -5.9 kcal/mol |        |        |    | Clomiphene<br>motif 3, Eint = -5.9 kcal/mol |        |        |  |
| 17 | -4.825                                      | 1.148  | 0.561  | 17 | -5.137                                      | 1.031  | 0.870  |  |
| 8  | 2.875                                       | -1.142 | -0.961 | 8  | 2.625                                       | -0.756 | -1.037 |  |
| 7  | 6.250                                       | -0.374 | 0.228  | 7  | 5.992                                       | -0.001 | 0.160  |  |
| 6  | 5.209                                       | -0.917 | -0.636 | 6  | 4.968                                       | -0.428 | -0.783 |  |
| 6  | 6.466                                       | -1.234 | 1.393  | 6  | 6.224                                       | -1.031 | 1.178  |  |
| 6  | 7.493                                       | -0.130 | -0.503 | 6  | 7.231                                       | 0.391  | -0.510 |  |
| 6  | 3.842                                       | -0.484 | -0.152 | 6  | 3.600                                       | -0.083 | -0.234 |  |
| 6  | 7.115                                       | -0.509 | 2.554  | 6  | 6.811                                       | -0.470 | 2.457  |  |
| 6  | 7.420                                       | 1.094  | -1.393 | 6  | 7.125                                       | 1.735  | -1.201 |  |
| 6  | -1.197                                      | -0.472 | -0.393 | 6  | -1.448                                      | -0.343 | -0.232 |  |
| 6  | 1.565                                       | -0.883 | -0.721 | 6  | 1.311                                       | -0.575 | -0.724 |  |
| 6  | -2.656                                      | -0.282 | -0.216 | 6  | -2.906                                      | -0.240 | 0.015  |  |
| 6  | -0.707                                      | -1.355 | -1.368 | 6  | -0.963                                      | -1.156 | -1.268 |  |
| 6  | -0.269                                      | 0.174  | 0.429  | 6  | -0.513                                      | 0.320  | 0.566  |  |
| 6  | 0.649                                       | -1.552 | -1.541 | 6  | 0.393                                       | -1.265 | -1.521 |  |
| 6  | 1.099                                       | -0.023 | 0.275  | 6  | 0.853                                       | 0.212  | 0.334  |  |
| 6  | -3.472                                      | -1.516 | -0.195 | 6  | -3.650                                      | -1.519 | -0.004 |  |
| 6  | -3.163                                      | 0.960  | -0.021 | 6  | -3.481                                      | 0.961  | 0.272  |  |
| 6  | -2.462                                      | 2.242  | -0.183 | 6  | -2.863                                      | 2.289  | 0.122  |  |
| 6  | -3.025                                      | -2.632 | 0.526  | 6  | -3.138                                      | -2.632 | 0.675  |  |
| 6  | -4.665                                      | -1.629 | -0.920 | 6  | -4.830                                      | -1.675 | -0.740 |  |
| 6  | -3.764                                      | -3.808 | 0.553  | 6  | -3.801                                      | -3.852 | 0.647  |  |
| 6  | -5.393                                      | -2.811 | -0.909 | 6  | -5.484                                      | -2.899 | -0.783 |  |
| 6  | -1.691                                      | 2.475  | -1.330 | 6  | -2.109                                      | 2.587  | -1.021 |  |
| 6  | -2.545                                      | 3.246  | 0.788  | 6  | -3.026                                      | 3.283  | 1.093  |  |
| 6  | -4.952                                      | -3.901 | -0.165 | 6  | -4.977                                      | -3.990 | -0.083 |  |
| 6  | -1.007                                      | 3.672  | -1.489 | 6  | -1.511                                      | 3.830  | -1.170 |  |
| 6  | -1.853                                      | 4.439  | 0.630  | 6  | -2.419                                      | 4.523  | 0.946  |  |
| 6  | -1.081                                      | 4.656  | -0.508 | 6  | -1.656                                      | 4.801  | -0.184 |  |
| 1  | 5.250                                       | -2.020 | -0.698 | 1  | 5.022                                       | -1.511 | -0.993 |  |
| 1  | 5.349                                       | -0.550 | -1.656 | 1  | 5.108                                       | 0.079  | -1.741 |  |
| 1  | 5.490                                       | -1.613 | 1.713  | 1  | 5.265                                       | -1.513 | 1.396  |  |
| 1  | 7.058                                       | -2.128 | 1.115  | 1  | 6.869                                       | -1.835 | 0.775  |  |
| 1  | 8.288                                       | 0.015  | 0.234  | 1  | 8.014                                       | 0.444  | 0.252  |  |
| 1  | 7.787                                       | -1.021 | -1.092 | 1  | 7.559                                       | -0.389 | -1.225 |  |
| 1  | 3.739                                       | 0.606  | -0.237 | 1  | 3.430                                       | 1.001  | -0.264 |  |
| 1  | 3.693                                       | -0.748 | 0.904  | 1  | 3.507                                       | -0.416 | 0.809  |  |
| 1  | 8.111                                       | -0.134 | 2.306  | 1  | 7.784                                       | 0.002  | 2.296  |  |
| 1  | 6.508                                       | 0.345  | 2.864  | 1  | 6.147                                       | 0.282  | 2.889  |  |
| 1  | 7.228                                       | -1.178 | 3.411  | 1  | 6.956                                       | -1.263 | 3.194  |  |
| 1  | 6.651                                       | 1.001  | -2.165 | 1  | 6.364                                       | 1.738  | -1.986 |  |
| 1  | 7.191                                       | 1.985  | -0.804 | 1  | 6.864                                       | 2.517  | -0.485 |  |
| 1  | 8.371                                       | 1.257  | -1.906 | 1  | 8.073                                       | 2.004  | -1.673 |  |
| 1  | -1.410                                      | -1.887 | -2.003 | 1  | -1.667                                      | -1.701 | -1.889 |  |
| 1  | -0.622                                      | 0.843  | 1.208  | 1  | -0.859                                      | 0.933  | 1.392  |  |
| 1  | 1.028                                       | -2.224 | -2.302 | 1  | 0.765                                       | -1.879 | -2.334 |  |
| 1  | 1.787                                       | 0.489  | 0.937  | 1  | 1.548                                       | 0.732  | 0.981  |  |
| 1  | -2.085                                      | -2.571 | 1.068  | 1  | -2.212                                      | -2.529 | 1.234  |  |
| 1  | -5.012                                      | -0.784 | -1.506 | 1  | -5.228                                      | -0.828 | -1.291 |  |
| 1  | -3.408                                      | -4.654 | 1.131  | 1  | -3.397                                      | -4.698 | 1.193  |  |
| 1  | -6.309                                      | -2.882 | -1.486 | 1  | -6.393                                      | -3.002 | -1.367 |  |
| 1  | -1.632                                      | 1.706  | -2.094 | 1  | -1.994                                      | 1.832  | -1.793 |  |
| 1  | -3.142                                      | 3.075  | 1.678  | 1  | -3.630                                      | 3.073  | 1.970  |  |
| 1  | -5.526                                      | -4.822 | -0.153 | 1  | -5.493                                      | -4.945 | -0.113 |  |
| 1  | -0.420                                      | 3.839  | -2.386 | 1  | -0.936                                      | 4.044  | -2.066 |  |
| 1  | -1.916                                      | 5.201  | 1.399  | 1  | -2.546                                      | 5.277  | 1.716  |  |
| 1  | -0.545                                      | 5.592  | -0.633 | 1  | -1.188                                      | 5.773  | -0.302 |  |
| 8  | -2.756                                      | 0.313  | 3.165  | 8  | 3.331                                       | -3.139 | 0.514  |  |

|                                             |        |        |        |                                             |        |        |        |
|---------------------------------------------|--------|--------|--------|---------------------------------------------|--------|--------|--------|
| 1                                           | -2.337 | -0.389 | 2.658  | 1                                           | 3.000  | -2.633 | -0.239 |
| 1                                           | -3.593 | 0.442  | 2.704  | 1                                           | 2.553  | -3.591 | 0.850  |
| Clomiphene<br>motif 4, Eint = -5.3 kcal/mol |        |        |        | Angrelide<br>motif 1, Eint = -3.5 kcal/mol  |        |        |        |
| 17                                          | -5.141 | 1.260  | 0.665  | 17                                          | 1.406  | 2.589  | 0.040  |
| 8                                           | 2.616  | -1.069 | -0.501 | 17                                          | 3.956  | 0.728  | -0.032 |
| 7                                           | 5.979  | -0.036 | 0.514  | 8                                           | -5.866 | -0.318 | -0.025 |
| 6                                           | 4.948  | -0.723 | -0.251 | 7                                           | -2.449 | 0.436  | -0.177 |
| 6                                           | 6.257  | -0.737 | 1.769  | 7                                           | -3.777 | -1.318 | 0.039  |
| 6                                           | 7.195  | 0.172  | -0.274 | 7                                           | -1.451 | -1.715 | 0.105  |
| 6                                           | 3.573  | -0.287 | 0.208  | 6                                           | -1.253 | 1.214  | 0.074  |
| 6                                           | 6.901  | 0.150  | 2.816  | 6                                           | -3.783 | 0.980  | -0.094 |
| 6                                           | 7.043  | 1.265  | -1.312 | 6                                           | -2.453 | -0.917 | 0.003  |
| 6                                           | -1.475 | -0.408 | -0.021 | 6                                           | -0.050 | 0.313  | 0.034  |
| 6                                           | 1.290  | -0.809 | -0.299 | 6                                           | -0.204 | -1.088 | 0.051  |
| 6                                           | -2.937 | -0.215 | 0.119  | 6                                           | -4.663 | -0.261 | -0.027 |
| 6                                           | -0.967 | -1.359 | -0.919 | 6                                           | 1.232  | 0.858  | 0.016  |
| 6                                           | -0.559 | 0.312  | 0.750  | 6                                           | 0.937  | -1.896 | 0.027  |
| 6                                           | 0.394  | -1.554 | -1.070 | 6                                           | 2.360  | 0.033  | -0.007 |
| 6                                           | 0.811  | 0.123  | 0.621  | 6                                           | 2.207  | -1.348 | -0.005 |
| 6                                           | -3.741 | -1.453 | 0.225  | 1                                           | -1.323 | 1.733  | 1.047  |
| 6                                           | -3.463 | 1.034  | 0.178  | 1                                           | -1.169 | 2.005  | -0.682 |
| 6                                           | -2.770 | 2.299  | -0.116 | 1                                           | -4.048 | 1.598  | -0.959 |
| 6                                           | -3.309 | -2.493 | 1.058  | 1                                           | -3.929 | 1.590  | 0.808  |
| 6                                           | -4.899 | -1.648 | -0.537 | 1                                           | -4.046 | -2.289 | 0.095  |
| 6                                           | -4.029 | -3.676 | 1.153  | 1                                           | 0.802  | -2.972 | 0.038  |
| 6                                           | -5.609 | -2.838 | -0.455 | 1                                           | 3.088  | -1.982 | -0.024 |
| 6                                           | -1.940 | 2.399  | -1.241 | 8                                           | 5.343  | -2.337 | 0.017  |
| 6                                           | -2.934 | 3.428  | 0.696  | 1                                           | 6.028  | -2.609 | -0.597 |
| 6                                           | -5.183 | -3.854 | 0.396  | 1                                           | 5.369  | -1.374 | -0.005 |
| 6                                           | -1.272 | 3.581  | -1.526 |                                             |        |        |        |
| 6                                           | -2.257 | 4.607  | 0.414  |                                             |        |        |        |
| 6                                           | -1.421 | 4.688  | -0.695 |                                             |        |        |        |
| 1                                           | 5.036  | -1.824 | -0.173 |                                             |        |        |        |
| 1                                           | 5.052  | -0.485 | -1.313 |                                             |        |        |        |
| 1                                           | 5.305  | -1.111 | 2.159  |                                             |        |        |        |
| 1                                           | 6.879  | -1.634 | 1.586  |                                             |        |        |        |
| 1                                           | 7.994  | 0.450  | 0.420  |                                             |        |        |        |
| 1                                           | 7.523  | -0.772 | -0.750 |                                             |        |        |        |
| 1                                           | 3.423  | 0.780  | -0.001 |                                             |        |        |        |
| 1                                           | 3.447  | -0.436 | 1.290  |                                             |        |        |        |
| 1                                           | 7.876  | 0.527  | 2.498  |                                             |        |        |        |
| 1                                           | 6.267  | 1.012  | 3.035  |                                             |        |        |        |
| 1                                           | 7.059  | -0.405 | 3.744  |                                             |        |        |        |
| 1                                           | 6.272  | 1.031  | -2.051 |                                             |        |        |        |
| 1                                           | 6.772  | 2.211  | -0.838 |                                             |        |        |        |
| 1                                           | 7.977  | 1.410  | -1.859 |                                             |        |        |        |
| 1                                           | -1.658 | -1.946 | -1.517 |                                             |        |        |        |
| 1                                           | -0.926 | 1.039  | 1.468  |                                             |        |        |        |
| 1                                           | 0.784  | -2.272 | -1.785 |                                             |        |        |        |
| 1                                           | 1.490  | 0.696  | 1.240  |                                             |        |        |        |
| 1                                           | -2.400 | -2.362 | 1.638  |                                             |        |        |        |
| 1                                           | -5.233 | -0.862 | -1.206 |                                             |        |        |        |
| 1                                           | -3.686 | -4.465 | 1.815  |                                             |        |        |        |
| 1                                           | -6.499 | -2.975 | -1.062 |                                             |        |        |        |
| 1                                           | -1.823 | 1.538  | -1.892 |                                             |        |        |        |
| 1                                           | -3.595 | 3.370  | 1.554  |                                             |        |        |        |
| 1                                           | -5.742 | -4.781 | 0.462  |                                             |        |        |        |
| 1                                           | -0.639 | 3.641  | -2.406 |                                             |        |        |        |
| 1                                           | -2.387 | 5.468  | 1.061  |                                             |        |        |        |
| 1                                           | -0.899 | 5.613  | -0.919 |                                             |        |        |        |
| 8                                           | 3.277  | -2.679 | -2.831 |                                             |        |        |        |
| 1                                           | 3.730  | -3.471 | -2.535 |                                             |        |        |        |
| 1                                           | 3.117  | -2.180 | -2.019 |                                             |        |        |        |
| Angrelide<br>motif 2, Eint = -5.1 kcal/mol  |        |        |        | Angrelide<br>motif 3, Eint = -10.3 kcal/mol |        |        |        |
| 17                                          | 2.101  | 1.995  | -0.518 | 17                                          | -2.825 | -1.989 | 0.085  |
| 17                                          | 4.332  | -0.245 | -0.306 | 17                                          | -4.811 | 0.478  | -0.032 |
| 8                                           | -5.532 | 0.300  | -0.088 | 8                                           | 4.944  | -1.050 | -0.057 |
| 7                                           | -2.048 | 0.472  | -0.412 | 7                                           | 1.450  | -0.901 | -0.196 |
| 7                                           | -3.624 | -1.006 | 0.053  | 7                                           | 3.190  | 0.458  | -0.005 |
| 7                                           | -1.388 | -1.758 | 0.127  | 7                                           | 1.042  | 1.437  | 0.054  |
| 6                                           | -0.735 | 1.074  | -0.299 | 6                                           | 0.100  | -1.341 | 0.084  |
| 6                                           | -3.276 | 1.230  | -0.367 | 6                                           | 2.600  | -1.767 | -0.101 |
| 6                                           | -2.257 | -0.827 | -0.060 | 6                                           | 1.807  | 0.409  | -0.034 |
| 6                                           | 0.308  | -0.007 | -0.242 | 6                                           | -0.834 | -0.164 | 0.024  |
| 6                                           | -0.063 | -1.349 | -0.021 | 6                                           | -0.323 | 1.150  | 0.011  |
| 6                                           | -4.335 | 0.164  | -0.124 | 6                                           | 3.758  | -0.787 | -0.055 |
| 6                                           | 1.659  | 0.321  | -0.331 | 6                                           | -2.213 | -0.362 | 0.020  |
| 6                                           | 0.940  | -2.320 | 0.084  | 6                                           | -1.218 | 2.224  | -0.032 |
| 6                                           | 2.651  | -0.657 | -0.216 | 6                                           | -3.096 | 0.720  | -0.022 |
| 6                                           | 2.278  | -1.981 | -0.013 | 6                                           | -2.585 | 2.014  | -0.051 |
| 1                                           | -0.667 | 1.704  | 0.605  | 1                                           | 0.045  | -1.835 | 1.072  |
| 1                                           | -0.563 | 1.735  | -1.158 | 1                                           | -0.193 | -2.104 | -0.647 |



|                                              |        |        |        |                                              |        |        |        |
|----------------------------------------------|--------|--------|--------|----------------------------------------------|--------|--------|--------|
| 1                                            | -3.477 | 1.774  | -1.296 | 1                                            | 2.696  | -2.450 | -0.952 |
| 1                                            | -3.284 | 1.959  | 0.455  | 1                                            | 2.590  | -2.378 | 0.814  |
| 1                                            | -4.037 | -1.906 | 0.245  | 1                                            | 3.748  | 1.310  | 0.037  |
| 1                                            | 0.640  | -3.348 | 0.251  | 1                                            | -0.811 | 3.228  | -0.045 |
| 1                                            | 3.049  | -2.737 | 0.071  | 1                                            | -3.274 | 2.849  | -0.084 |
| 8                                            | 0.865  | 1.132  | 2.714  | 8                                            | 5.679  | 1.642  | 0.186  |
| 1                                            | 1.085  | 0.198  | 2.655  | 1                                            | 6.400  | 2.105  | -0.244 |
| 1                                            | 1.637  | 1.569  | 2.340  | 1                                            | 5.863  | 0.695  | 0.077  |
| Angrelide<br>motif 4, Eint = -11.6 kcal/mol  |        |        |        | Diclofenac<br>motif 1, Eint = -3.6 kcal/mol  |        |        |        |
| 17                                           | -2.668 | -2.067 | 0.076  | 17                                           | -1.730 | -1.642 | -1.017 |
| 17                                           | -4.618 | 0.429  | -0.041 | 17                                           | -0.045 | 3.209  | 0.725  |
| 8                                            | 5.119  | -1.251 | -0.024 | 8                                            | 4.824  | 0.627  | -1.030 |
| 7                                            | 1.626  | -1.050 | -0.149 | 8                                            | 2.920  | 1.761  | -0.676 |
| 7                                            | 3.385  | 0.288  | 0.003  | 7                                            | 0.333  | 0.418  | -0.274 |
| 7                                            | 1.250  | 1.294  | 0.048  | 6                                            | 2.155  | -1.168 | -0.103 |
| 6                                            | 0.260  | -1.468 | 0.082  | 6                                            | 0.929  | -0.676 | 0.383  |
| 6                                            | 2.764  | -1.934 | -0.071 | 6                                            | 2.790  | -0.558 | -1.327 |
| 6                                            | 2.009  | 0.248  | -0.021 | 6                                            | -0.989 | 0.794  | -0.064 |
| 6                                            | -0.651 | -0.273 | 0.023  | 6                                            | 2.764  | -2.236 | 0.550  |
| 6                                            | -0.121 | 1.033  | 0.008  | 6                                            | 0.337  | -1.289 | 1.490  |
| 6                                            | 3.947  | -0.972 | -0.030 | 6                                            | 2.172  | -2.843 | 1.651  |
| 6                                            | -2.034 | -0.450 | 0.015  | 6                                            | 0.950  | -2.365 | 2.113  |
| 6                                            | -1.000 | 2.119  | -0.039 | 6                                            | -2.070 | -0.061 | -0.348 |
| 6                                            | -2.901 | 0.645  | -0.028 | 6                                            | -1.330 | 2.086  | 0.378  |
| 6                                            | -2.370 | 1.930  | -0.059 | 6                                            | 3.482  | 0.734  | -0.988 |
| 1                                            | 0.170  | -1.982 | 1.055  | 6                                            | -3.392 | 0.314  | -0.162 |
| 1                                            | -0.028 | -2.209 | -0.675 | 6                                            | -2.645 | 2.493  | 0.543  |
| 1                                            | 2.840  | -2.608 | -0.931 | 6                                            | -3.675 | 1.598  | 0.287  |
| 1                                            | 2.749  | -2.551 | 0.837  | 1                                            | 2.012  | -0.326 | -2.063 |
| 1                                            | 3.877  | 1.184  | 0.035  | 1                                            | 3.502  | -1.253 | -1.773 |
| 1                                            | -0.583 | 3.120  | -0.059 | 1                                            | 0.975  | 1.195  | -0.419 |
| 1                                            | -3.046 | 2.776  | -0.095 | 1                                            | 3.713  | -2.606 | 0.170  |
| 8                                            | 3.450  | 3.070  | 0.011  | 1                                            | -0.609 | -0.908 | 1.862  |
| 1                                            | 2.510  | 2.815  | 0.072  | 1                                            | 2.657  | -3.681 | 2.139  |
| 1                                            | 3.579  | 3.763  | 0.662  | 1                                            | 0.474  | -2.825 | 2.973  |
|                                              |        |        |        | 1                                            | -4.186 | -0.390 | -0.387 |
|                                              |        |        |        | 1                                            | -2.849 | 3.500  | 0.886  |
|                                              |        |        |        | 1                                            | -4.706 | 1.903  | 0.428  |
|                                              |        |        |        | 1                                            | 5.181  | 1.486  | -0.761 |
|                                              |        |        |        | 8                                            | -4.966 | -2.511 | -0.807 |
|                                              |        |        |        | 1                                            | -5.389 | -2.984 | -1.527 |
|                                              |        |        |        | 1                                            | -4.023 | -2.638 | -0.961 |
| Diclofenac<br>motif 2, Eint = -11.7 kcal/mol |        |        |        | Diclofenac<br>motif 3, Eint = -3.4 kcal/mol  |        |        |        |
| 17                                           | 2.318  | 1.891  | -1.317 | 17                                           | -0.082 | -2.853 | -1.231 |
| 17                                           | 0.680  | -2.819 | 0.831  | 17                                           | -1.856 | 1.997  | 0.424  |
| 8                                            | -4.264 | -0.282 | -0.814 | 8                                            | 3.702  | 2.959  | -0.773 |
| 8                                            | -2.347 | -1.397 | -0.449 | 8                                            | 1.478  | 2.685  | -0.655 |
| 7                                            | 0.266  | -0.088 | -0.313 | 7                                            | 0.225  | 0.036  | -0.409 |
| 6                                            | -1.522 | 1.536  | -0.160 | 6                                            | 2.605  | -0.107 | 0.008  |
| 6                                            | -0.275 | 1.065  | 0.289  | 6                                            | 1.293  | -0.476 | 0.353  |
| 6                                            | -2.238 | 0.848  | -1.295 | 6                                            | 2.860  | 0.780  | -1.185 |
| 6                                            | 1.594  | -0.468 | -0.168 | 6                                            | -1.066 | -0.478 | -0.340 |
| 6                                            | -2.080 | 2.659  | 0.446  | 6                                            | 3.668  | -0.588 | 0.769  |
| 6                                            | 0.390  | 1.749  | 1.309  | 6                                            | 1.086  | -1.341 | 1.431  |
| 6                                            | -1.416 | 3.337  | 1.462  | 6                                            | 3.459  | -1.446 | 1.842  |
| 6                                            | -0.174 | 2.878  | 1.886  | 6                                            | 2.160  | -1.825 | 2.163  |
| 6                                            | 2.661  | 0.354  | -0.578 | 6                                            | -1.361 | -1.811 | -0.682 |
| 6                                            | 1.950  | -1.736 | 0.328  | 6                                            | -2.168 | 0.324  | 0.006  |
| 6                                            | -2.942 | -0.394 | -0.820 | 6                                            | 2.578  | 2.221  | -0.857 |
| 6                                            | 3.986  | -0.039 | -0.455 | 6                                            | -2.654 | -2.313 | -0.637 |
| 6                                            | 3.268  | -2.157 | 0.430  | 6                                            | -3.472 | -0.147 | 0.029  |
| 6                                            | 4.290  | -1.297 | 0.050  | 6                                            | -3.707 | -1.480 | -0.282 |
| 1                                            | -1.508 | 0.541  | -2.052 | 1                                            | 2.185  | 0.494  | -2.000 |
| 1                                            | -2.960 | 1.525  | -1.755 | 1                                            | 3.890  | 0.672  | -1.526 |
| 1                                            | -0.397 | -0.858 | -0.367 | 1                                            | 0.276  | 1.043  | -0.542 |
| 1                                            | -3.045 | 3.014  | 0.096  | 1                                            | 4.678  | -0.294 | 0.497  |
| 1                                            | 1.352  | 1.382  | 1.652  | 1                                            | 0.072  | -1.625 | 1.694  |
| 1                                            | -1.862 | 4.217  | 1.913  | 1                                            | 4.300  | -1.820 | 2.414  |
| 1                                            | 0.358  | 3.394  | 2.679  | 1                                            | 1.977  | -2.494 | 2.998  |
| 1                                            | 4.768  | 0.636  | -0.782 | 1                                            | -2.825 | -3.349 | -0.905 |
| 1                                            | 3.480  | -3.145 | 0.819  | 1                                            | -4.282 | 0.521  | 0.302  |
| 1                                            | 5.323  | -1.611 | 0.137  | 1                                            | -4.718 | -1.868 | -0.255 |
| 1                                            | -4.643 | -1.123 | -0.457 | 1                                            | 3.430  | 3.854  | -0.521 |
| 8                                            | -4.647 | -2.791 | 0.144  | 8                                            | -5.121 | 2.514  | 1.056  |
| 1                                            | -4.906 | -3.095 | 1.016  | 1                                            | -4.191 | 2.757  | 0.997  |
| 1                                            | -3.677 | -2.746 | 0.151  | 1                                            | -5.587 | 3.266  | 0.684  |
| Diclofenac<br>motif 4, Eint = -5.2 kcal/mol  |        |        |        | Allopurinol<br>motif 1, Eint = -7.8 kcal/mol |        |        |        |
| 17                                           | -1.589 | -2.275 | -1.374 | 8                                            | 1.470  | -1.723 | -0.028 |
| 17                                           | -1.818 | 2.679  | 0.834  | 7                                            | -1.287 | 1.962  | 0.001  |
| 8                                            | 3.784  | 2.019  | -0.301 | 7                                            | -0.803 | -1.937 | -0.001 |
| 8                                            | 1.590  | 2.471  | -0.279 | 7                                            | -2.384 | -0.186 | 0.016  |

|                               |        |        |        |                               |        |        |        |
|-------------------------------|--------|--------|--------|-------------------------------|--------|--------|--------|
| 7                             | -0.415 | 0.284  | -0.268 | 7                             | -0.035 | 2.489  | -0.013 |
| 6                             | 1.820  | -0.613 | 0.011  | 6                             | 0.064  | 0.235  | -0.010 |
| 6                             | 0.461  | -0.614 | 0.376  | 6                             | -1.285 | 0.613  | 0.004  |
| 6                             | 2.315  | 0.309  | -1.078 | 6                             | 0.385  | -1.159 | -0.015 |
| 6                             | -1.799 | 0.171  | -0.198 | 6                             | 0.786  | 1.451  | -0.020 |
| 6                             | 2.703  | -1.480 | 0.651  | 6                             | -2.074 | -1.446 | 0.014  |
| 6                             | 0.019  | -1.504 | 1.358  | 1                             | 1.859  | 1.590  | -0.031 |
| 6                             | 2.254  | -2.364 | 1.626  | 1                             | -2.088 | 2.574  | 0.009  |
| 6                             | 0.907  | -2.375 | 1.971  | 1                             | -0.657 | -2.938 | -0.001 |
| 6                             | -2.486 | -0.967 | -0.662 | 1                             | -2.865 | -2.191 | 0.023  |
| 6                             | -2.601 | 1.228  | 0.272  | 8                             | 3.607  | 0.139  | 0.073  |
| 6                             | 2.483  | 1.699  | -0.537 | 1                             | 3.002  | -0.620 | 0.030  |
| 6                             | -3.870 | -1.064 | -0.611 | 1                             | 4.444  | -0.196 | -0.254 |
| 6                             | -3.986 | 1.158  | 0.301  |                               |        |        |        |
| 6                             | -4.620 | 0.000  | -0.128 |                               |        |        |        |
| 1                             | 1.570  | 0.362  | -1.879 |                               |        |        |        |
| 1                             | 3.258  | -0.059 | -1.483 |                               |        |        |        |
| 1                             | -0.073 | 1.241  | -0.282 |                               |        |        |        |
| 1                             | 3.749  | -1.463 | 0.357  |                               |        |        |        |
| 1                             | -1.030 | -1.503 | 1.640  |                               |        |        |        |
| 1                             | 2.951  | -3.043 | 2.106  |                               |        |        |        |
| 1                             | 0.543  | -3.058 | 2.732  |                               |        |        |        |
| 1                             | -4.346 | -1.965 | -0.976 |                               |        |        |        |
| 1                             | -4.552 | 2.003  | 0.673  |                               |        |        |        |
| 1                             | -5.702 | -0.069 | -0.098 |                               |        |        |        |
| 1                             | 3.784  | 2.902  | 0.097  |                               |        |        |        |
| 8                             | 5.540  | -0.259 | -0.741 |                               |        |        |        |
| 1                             | 6.491  | -0.205 | -0.849 |                               |        |        |        |
| 1                             | 5.260  | 0.637  | -0.521 |                               |        |        |        |
| Allopurinol                   |        |        |        | Allopurinol                   |        |        |        |
| motif 2, Eint = -9.9 kcal/mol |        |        |        | motif 3, Eint = -6.0 kcal/mol |        |        |        |
| 8                             | 3.132  | 0.221  | -0.007 | 8                             | 1.901  | 2.332  | -0.023 |
| 7                             | -1.399 | 1.041  | 0.009  | 7                             | 0.512  | -2.051 | 0.014  |
| 7                             | 1.610  | -1.495 | -0.001 | 7                             | -0.330 | 1.794  | 0.020  |
| 7                             | -0.737 | -1.282 | 0.011  | 7                             | -1.237 | -0.382 | 0.046  |
| 7                             | -0.840 | 2.273  | 0.005  | 7                             | 1.867  | -2.132 | -0.013 |
| 6                             | 0.772  | 0.691  | 0.003  | 6                             | 1.207  | 0.030  | -0.003 |
| 6                             | -0.477 | 0.059  | 0.008  | 6                             | 0.065  | -0.776 | 0.021  |
| 6                             | 1.964  | -0.105 | -0.002 | 6                             | 1.061  | 1.457  | -0.005 |
| 6                             | 0.470  | 2.068  | 0.001  | 6                             | 2.288  | -0.877 | -0.023 |
| 6                             | 0.348  | -1.999 | 0.005  | 6                             | -1.365 | 0.916  | 0.044  |
| 1                             | 1.149  | 2.908  | -0.003 | 1                             | 3.347  | -0.664 | -0.045 |
| 1                             | -2.408 | 0.904  | 0.010  | 1                             | -0.036 | -2.897 | 0.021  |
| 1                             | 2.396  | -2.133 | -0.006 | 1                             | -0.529 | 2.787  | 0.018  |
| 1                             | 0.269  | -3.082 | 0.005  | 1                             | -2.368 | 1.336  | 0.060  |
| 8                             | -3.546 | -0.741 | -0.081 | 8                             | -4.107 | -0.332 | -0.108 |
| 1                             | -4.233 | -1.150 | 0.448  | 1                             | -3.254 | -0.786 | -0.029 |
| 1                             | -2.775 | -1.329 | -0.016 | 1                             | -4.731 | -0.893 | 0.356  |
| Allopurinol                   |        |        |        | Flurbiprofen                  |        |        |        |
| motif 4, Eint = -8.6 kcal/mol |        |        |        | motif 1, Eint = -7.6 kcal/mol |        |        |        |
| 8                             | 2.675  | -1.656 | -0.017 | 9                             | -0.861 | 1.986  | -0.304 |
| 7                             | -1.472 | 0.340  | 0.030  | 8                             | 3.582  | -1.622 | 1.667  |
| 7                             | 2.451  | 0.628  | -0.012 | 8                             | 4.121  | 0.462  | 1.053  |
| 7                             | 0.420  | 1.835  | 0.013  | 6                             | 2.981  | -0.991 | -0.534 |
| 7                             | -1.734 | -0.992 | 0.028  | 6                             | 1.486  | -0.756 | -0.397 |
| 6                             | 0.492  | -0.646 | 0.006  | 6                             | -1.306 | -0.331 | -0.115 |
| 6                             | -0.150 | 0.600  | 0.016  | 6                             | 0.968  | 0.539  | -0.405 |
| 6                             | 1.926  | -0.701 | -0.008 | 6                             | 0.612  | -1.831 | -0.241 |
| 6                             | -0.552 | -1.591 | 0.014  | 6                             | -0.396 | 0.719  | -0.264 |
| 6                             | 1.717  | 1.776  | -0.001 | 6                             | -0.752 | -1.618 | -0.109 |
| 1                             | -0.490 | -2.669 | 0.009  | 6                             | 3.605  | -0.241 | -1.703 |
| 1                             | -2.266 | 0.974  | 0.032  | 6                             | -2.762 | -0.130 | 0.015  |
| 1                             | 3.461  | 0.687  | -0.023 | 6                             | 3.632  | -0.612 | 0.779  |
| 1                             | 2.289  | 2.700  | -0.006 | 6                             | -3.301 | 0.907  | 0.787  |
| 8                             | -4.230 | 0.318  | -0.107 | 6                             | -3.645 | -1.012 | -0.621 |
| 1                             | -3.807 | -0.552 | -0.056 | 6                             | -4.676 | 1.049  | 0.921  |
| 1                             | -5.000 | 0.259  | 0.462  | 6                             | -5.020 | -0.866 | -0.490 |
|                               |        |        |        | 6                             | -5.542 | 0.166  | 0.283  |
|                               |        |        |        | 1                             | 3.130  | -2.069 | -0.655 |
|                               |        |        |        | 1                             | 1.604  | 1.413  | -0.520 |
|                               |        |        |        | 1                             | 1.006  | -2.843 | -0.214 |
|                               |        |        |        | 1                             | -1.418 | -2.465 | 0.025  |
|                               |        |        |        | 1                             | 3.138  | -0.558 | -2.637 |
|                               |        |        |        | 1                             | 3.475  | 0.838  | -1.610 |
|                               |        |        |        | 1                             | 4.677  | -0.442 | -1.771 |
|                               |        |        |        | 1                             | -2.638 | 1.597  | 1.297  |
|                               |        |        |        | 1                             | -3.245 | -1.808 | -1.242 |
|                               |        |        |        | 1                             | -5.074 | 1.855  | 1.529  |
|                               |        |        |        | 1                             | -5.685 | -1.555 | -1.000 |
|                               |        |        |        | 1                             | -6.615 | 0.284  | 0.385  |
|                               |        |        |        | 1                             | 3.960  | -1.291 | 2.494  |
|                               |        |        |        | 8                             | 3.405  | 2.834  | -0.361 |
|                               |        |        |        | 1                             | 3.808  | 2.165  | 0.213  |
|                               |        |        |        | 1                             | 3.456  | 3.653  | 0.135  |

|                                                                                   |        |        |        |                                                                                   |        |        |        |
|-----------------------------------------------------------------------------------|--------|--------|--------|-----------------------------------------------------------------------------------|--------|--------|--------|
| <p style="text-align: center;">Flurbiprofen<br/>motif 2, Eint = -4.9 kcal/mol</p> |        |        |        | <p style="text-align: center;">Flurbiprofen<br/>motif 3, Eint = -5.8 kcal/mol</p> |        |        |        |
| 9                                                                                 | -0.634 | 1.772  | 0.785  | 9                                                                                 | -1.222 | -2.301 | 0.111  |
| 8                                                                                 | 4.342  | -1.387 | 1.193  | 8                                                                                 | 3.735  | 0.339  | -1.565 |
| 8                                                                                 | 4.539  | 0.854  | 1.169  | 8                                                                                 | 4.018  | -1.740 | -0.764 |
| 6                                                                                 | 3.517  | -0.265 | -0.723 | 6                                                                                 | 3.047  | -0.045 | 0.680  |
| 6                                                                                 | 2.020  | -0.329 | -0.495 | 6                                                                                 | 1.540  | 0.000  | 0.493  |
| 6                                                                                 | -0.786 | -0.434 | -0.070 | 6                                                                                 | -1.279 | 0.069  | 0.159  |
| 6                                                                                 | 1.348  | 0.757  | 0.068  | 6                                                                                 | 0.813  | -1.183 | 0.366  |
| 6                                                                                 | 1.285  | -1.463 | -0.839 | 6                                                                                 | 0.859  | 1.216  | 0.444  |
| 6                                                                                 | -0.016 | 0.682  | 0.265  | 6                                                                                 | -0.558 | -1.128 | 0.202  |
| 6                                                                                 | -0.086 | -1.507 | -0.635 | 6                                                                                 | -0.519 | 1.239  | 0.286  |
| 6                                                                                 | 3.922  | 0.901  | -1.615 | 6                                                                                 | 3.465  | -0.868 | 1.892  |
| 6                                                                                 | -2.246 | -0.489 | 0.127  | 6                                                                                 | -2.745 | 0.127  | 0.004  |
| 6                                                                                 | 4.197  | -0.167 | 0.629  | 6                                                                                 | 3.659  | -0.607 | -0.582 |
| 6                                                                                 | -2.854 | 0.003  | 1.289  | 6                                                                                 | -3.433 | -0.722 | -0.871 |
| 6                                                                                 | -3.061 | -1.050 | -0.865 | 6                                                                                 | -3.481 | 1.077  | 0.724  |
| 6                                                                                 | -4.233 | -0.062 | 1.449  | 6                                                                                 | -4.810 | -0.617 | -1.023 |
| 6                                                                                 | -4.440 | -1.110 | -0.705 | 6                                                                                 | -4.858 | 1.177  | 0.575  |
| 6                                                                                 | -5.032 | -0.613 | 0.453  | 6                                                                                 | -5.529 | 0.330  | -0.302 |
| 1                                                                                 | 3.822  | -1.214 | -1.174 | 1                                                                                 | 3.393  | 0.988  | 0.783  |
| 1                                                                                 | 1.874  | 1.662  | 0.354  | 1                                                                                 | 1.297  | -2.154 | 0.395  |
| 1                                                                                 | 1.796  | -2.322 | -1.265 | 1                                                                                 | 1.418  | 2.144  | 0.511  |
| 1                                                                                 | -0.641 | -2.403 | -0.897 | 1                                                                                 | -1.034 | 2.194  | 0.233  |
| 1                                                                                 | 3.406  | 0.844  | -2.575 | 1                                                                                 | 3.002  | -0.468 | 2.796  |
| 1                                                                                 | 3.674  | 1.855  | -1.147 | 1                                                                                 | 3.165  | -1.911 | 1.784  |
| 1                                                                                 | 4.999  | 0.899  | -1.800 | 1                                                                                 | 4.549  | -0.852 | 2.023  |
| 1                                                                                 | -2.242 | 0.429  | 2.076  | 1                                                                                 | -2.885 | -1.458 | -1.448 |
| 1                                                                                 | -2.606 | -1.414 | -1.781 | 1                                                                                 | -2.967 | 1.727  | 1.425  |
| 1                                                                                 | -4.685 | 0.322  | 2.358  | 1                                                                                 | -5.324 | -1.279 | -1.713 |
| 1                                                                                 | -5.054 | -1.537 | -1.491 | 1                                                                                 | -5.410 | 1.914  | 1.150  |
| 1                                                                                 | -6.109 | -0.655 | 0.577  | 1                                                                                 | -6.605 | 0.406  | -0.420 |
| 1                                                                                 | 4.729  | -1.245 | 2.069  | 1                                                                                 | 4.071  | -0.109 | -2.355 |
| 8                                                                                 | -2.958 | 2.486  | -1.205 | 8                                                                                 | 3.457  | 3.043  | -0.489 |
| 1                                                                                 | -2.384 | 2.398  | -0.438 | 1                                                                                 | 4.038  | 3.737  | -0.809 |
| 1                                                                                 | -3.480 | 1.679  | -1.183 | 1                                                                                 | 3.586  | 2.308  | -1.102 |
| <p style="text-align: center;">Amoxapine<br/>motif 1, Eint = -4.7 kcal/mol</p>    |        |        |        | <p style="text-align: center;">Amoxapine<br/>motif 2, Eint = -3.6 kcal/mol</p>    |        |        |        |
| 17                                                                                | 2.360  | 3.539  | 0.694  | 17                                                                                | 4.013  | 0.289  | -1.112 |
| 8                                                                                 | -2.236 | 0.571  | -1.474 | 8                                                                                 | -0.839 | -1.781 | 1.495  |
| 7                                                                                 | 1.053  | -1.579 | -0.326 | 7                                                                                 | -0.921 | 2.059  | 0.088  |
| 7                                                                                 | 3.460  | -3.015 | -0.643 | 7                                                                                 | -0.895 | 4.870  | 0.363  |
| 7                                                                                 | -1.204 | -1.610 | 0.121  | 7                                                                                 | -2.197 | 0.159  | -0.153 |
| 6                                                                                 | 1.129  | -2.985 | 0.055  | 6                                                                                 | -2.112 | 2.845  | -0.223 |
| 6                                                                                 | 1.997  | -1.244 | -1.397 | 6                                                                                 | -0.078 | 2.716  | 1.093  |
| 6                                                                                 | 2.554  | -3.312 | 0.460  | 6                                                                                 | -1.698 | 4.233  | -0.673 |
| 6                                                                                 | 3.409  | -1.593 | -0.972 | 6                                                                                 | 0.314  | 4.099  | 0.615  |
| 6                                                                                 | -0.160 | -0.930 | -0.225 | 6                                                                                 | -1.037 | 0.679  | 0.081  |
| 6                                                                                 | -0.107 | 0.546  | -0.361 | 6                                                                                 | 0.235  | -0.073 | 0.190  |
| 6                                                                                 | -1.157 | 1.250  | -0.956 | 6                                                                                 | 0.288  | -1.289 | 0.876  |
| 6                                                                                 | -2.459 | -1.057 | 0.312  | 6                                                                                 | -2.427 | -1.205 | -0.244 |
| 6                                                                                 | 0.975  | 1.265  | 0.160  | 6                                                                                 | 1.400  | 0.394  | -0.430 |
| 6                                                                                 | -3.005 | -0.025 | -0.473 | 6                                                                                 | -1.811 | -2.169 | 0.573  |
| 6                                                                                 | -1.117 | 2.635  | -1.070 | 6                                                                                 | 1.477  | -2.002 | 0.980  |
| 6                                                                                 | 0.998  | 2.644  | 0.046  | 6                                                                                 | 2.574  | -0.332 | -0.325 |
| 6                                                                                 | -0.030 | 3.344  | -0.577 | 6                                                                                 | 2.638  | -1.525 | 0.388  |
| 6                                                                                 | -3.310 | -1.644 | 1.263  | 6                                                                                 | -3.435 | -1.657 | -1.110 |
| 6                                                                                 | -4.317 | 0.396  | -0.326 | 6                                                                                 | -2.176 | -3.505 | 0.535  |
| 6                                                                                 | -4.619 | -1.219 | 1.428  | 6                                                                                 | -3.795 | -2.994 | -1.167 |
| 6                                                                                 | -5.133 | -0.202 | 0.627  | 6                                                                                 | -3.174 | -3.925 | -0.337 |
| 1                                                                                 | 0.812  | -3.625 | -0.782 | 1                                                                                 | -2.768 | 2.908  | 0.658  |
| 1                                                                                 | 0.432  | -3.153 | 0.876  | 1                                                                                 | -2.669 | 2.326  | -1.003 |
| 1                                                                                 | 1.918  | -0.186 | -1.643 | 1                                                                                 | 0.807  | 2.111  | 1.288  |
| 1                                                                                 | 1.734  | -1.820 | -2.298 | 1                                                                                 | -0.640 | 2.806  | 2.036  |
| 1                                                                                 | 2.797  | -2.738 | 1.374  | 1                                                                                 | -1.155 | 4.143  | -1.632 |
| 1                                                                                 | 2.626  | -4.376 | 0.704  | 1                                                                                 | -2.592 | 4.836  | -0.854 |
| 1                                                                                 | 4.095  | -1.395 | -1.800 | 1                                                                                 | 0.905  | 4.598  | 1.388  |
| 1                                                                                 | 3.697  | -0.945 | -0.126 | 1                                                                                 | 0.952  | 3.996  | -0.284 |
| 1                                                                                 | 4.407  | -3.268 | -0.382 | 1                                                                                 | -0.651 | 5.813  | 0.080  |
| 1                                                                                 | 1.787  | 0.733  | 0.648  | 1                                                                                 | 1.372  | 1.324  | -0.986 |
| 1                                                                                 | -1.944 | 3.145  | -1.551 | 1                                                                                 | 1.480  | -2.933 | 1.535  |
| 1                                                                                 | 0.016  | 4.423  | -0.664 | 1                                                                                 | 3.572  | -2.071 | 0.466  |
| 1                                                                                 | -2.907 | -2.456 | 1.860  | 1                                                                                 | -3.933 | -0.918 | -1.729 |
| 1                                                                                 | -4.682 | 1.187  | -0.972 | 1                                                                                 | -1.672 | -4.199 | 1.200  |
| 1                                                                                 | -5.247 | -1.694 | 2.174  | 1                                                                                 | -4.577 | -3.311 | -1.850 |
| 1                                                                                 | -6.162 | 0.122  | 0.739  | 1                                                                                 | -3.465 | -4.969 | -0.365 |
| 8                                                                                 | 3.745  | 0.670  | 1.897  | 8                                                                                 | 5.803  | -2.275 | 0.102  |
| 1                                                                                 | 3.729  | 0.553  | 2.849  | 1                                                                                 | 5.682  | -1.473 | -0.418 |
| 1                                                                                 | 3.635  | 1.620  | 1.773  | 1                                                                                 | 6.402  | -2.812 | -0.422 |
| <p style="text-align: center;">Amoxapine<br/>motif 3, Eint = -6.4 kcal/mol</p>    |        |        |        | <p style="text-align: center;">Amoxapine<br/>motif 4, Eint = -8.1 kcal/mol</p>    |        |        |        |
| 17                                                                                | -1.738 | 3.968  | -1.406 | 17                                                                                | 3.205  | 3.321  | 1.117  |
| 8                                                                                 | 1.874  | 0.078  | 1.128  | 8                                                                                 | -1.616 | 1.193  | -1.495 |
| 7                                                                                 | -1.887 | -1.183 | 0.201  | 7                                                                                 | 1.153  | -1.490 | -0.113 |

|                                             |        |        |        |                                             |        |        |        |
|---------------------------------------------|--------|--------|--------|---------------------------------------------|--------|--------|--------|
| 7                                           | -4.543 | -1.936 | 0.797  | 7                                           | 3.274  | -3.340 | -0.356 |
| 7                                           | 0.265  | -1.872 | -0.229 | 7                                           | -1.114 | -1.144 | 0.115  |
| 6                                           | -2.319 | -2.568 | 0.033  | 6                                           | 0.949  | -2.899 | 0.225  |
| 6                                           | -2.660 | -0.486 | 1.235  | 6                                           | 2.217  | -1.304 | -1.107 |
| 6                                           | -3.805 | -2.600 | -0.270 | 6                                           | 2.262  | -3.506 | 0.680  |
| 6                                           | -4.137 | -0.542 | 0.903  | 6                                           | 3.506  | -1.928 | -0.613 |
| 6                                           | -0.545 | -0.898 | 0.027  | 6                                           | 0.064  | -0.646 | -0.102 |
| 6                                           | -0.191 | 0.542  | -0.003 | 6                                           | 0.369  | 0.802  | -0.194 |
| 6                                           | 1.021  | 0.989  | 0.527  | 6                                           | -0.485 | 1.674  | -0.875 |
| 6                                           | 1.616  | -1.704 | -0.487 | 6                                           | -2.270 | -0.377 | 0.229  |
| 6                                           | -1.034 | 1.478  | -0.613 | 6                                           | 1.504  | 1.330  | 0.431  |
| 6                                           | 2.443  | -0.785 | 0.181  | 6                                           | -2.558 | 0.738  | -0.574 |
| 6                                           | 1.380  | 2.330  | 0.494  | 6                                           | -0.195 | 3.030  | -0.971 |
| 6                                           | -0.671 | 2.815  | -0.649 | 6                                           | 1.782  | 2.685  | 0.338  |
| 6                                           | 0.524  | 3.255  | -0.088 | 6                                           | 0.948  | 3.542  | -0.373 |
| 6                                           | 2.246  | -2.584 | -1.382 | 6                                           | -3.280 | -0.821 | 1.097  |
| 6                                           | 3.811  | -0.727 | -0.026 | 6                                           | -3.785 | 1.381  | -0.519 |
| 6                                           | 3.613  | -2.530 | -1.606 | 6                                           | -4.505 | -0.174 | 1.167  |
| 6                                           | 4.403  | -1.607 | -0.925 | 6                                           | -4.767 | 0.924  | 0.352  |
| 1                                           | -2.102 | -3.147 | 0.944  | 1                                           | 0.549  | -3.448 | -0.639 |
| 1                                           | -1.740 | -3.010 | -0.776 | 1                                           | 0.206  | -2.960 | 1.020  |
| 1                                           | -2.322 | 0.547  | 1.318  | 1                                           | 2.352  | -0.243 | -1.312 |
| 1                                           | -2.490 | -0.976 | 2.207  | 1                                           | 1.918  | -1.794 | -2.047 |
| 1                                           | -3.972 | -2.128 | -1.256 | 1                                           | 2.557  | -3.032 | 1.635  |
| 1                                           | -4.136 | -3.640 | -0.340 | 1                                           | 2.114  | -4.572 | 0.871  |
| 1                                           | -4.708 | -0.059 | 1.700  | 1                                           | 4.278  | -1.821 | -1.381 |
| 1                                           | -4.312 | 0.028  | -0.030 | 1                                           | 3.847  | -1.376 | 0.285  |
| 1                                           | -5.539 | -1.994 | 0.616  | 1                                           | 4.138  | -3.788 | -0.071 |
| 1                                           | -1.968 | 1.148  | -1.053 | 1                                           | 2.164  | 0.670  | 0.984  |
| 1                                           | 2.323  | 2.635  | 0.937  | 1                                           | -0.873 | 3.672  | -1.520 |
| 1                                           | 0.784  | 4.307  | -0.119 | 1                                           | 1.186  | 4.597  | -0.445 |
| 1                                           | 1.624  | -3.315 | -1.889 | 1                                           | -3.073 | -1.693 | 1.709  |
| 1                                           | 4.393  | 0.006  | 0.525  | 1                                           | -3.954 | 2.230  | -1.173 |
| 1                                           | 4.068  | -3.221 | -2.308 | 1                                           | -5.265 | -0.537 | 1.852  |
| 1                                           | 5.474  | -1.571 | -1.089 | 1                                           | -5.729 | 1.423  | 0.391  |
| 8                                           | 3.869  | 1.574  | 2.527  | 8                                           | -2.116 | -3.922 | 0.054  |
| 1                                           | 3.178  | 0.931  | 2.317  | 1                                           | -2.999 | -3.840 | -0.310 |
| 1                                           | 4.044  | 1.453  | 3.462  | 1                                           | -1.762 | -3.016 | 0.020  |
| Alprazolam<br>motif 1, Eint = -9.0 kcal/mol |        |        |        | Alprazolam<br>motif 2, Eint = -7.3 kcal/mol |        |        |        |
| 17                                          | 2.706  | 3.843  | -0.078 | 17                                          | -0.293 | 4.556  | -0.883 |
| 7                                           | -1.878 | 0.102  | -0.352 | 7                                           | -2.049 | -1.005 | 0.160  |
| 7                                           | 0.207  | -1.698 | -1.550 | 7                                           | 0.653  | -1.630 | -0.972 |
| 7                                           | -3.181 | -1.465 | -1.200 | 7                                           | -2.282 | -3.174 | -0.181 |
| 7                                           | -3.814 | -0.894 | -0.118 | 7                                           | -3.103 | -2.802 | 0.865  |
| 6                                           | -0.773 | 0.977  | -0.261 | 6                                           | -1.610 | 0.316  | -0.069 |
| 6                                           | 0.534  | 0.486  | -0.450 | 6                                           | -0.255 | 0.575  | -0.356 |
| 6                                           | -2.032 | -0.865 | -1.327 | 6                                           | -1.665 | -2.101 | -0.588 |
| 6                                           | 0.840  | -0.950 | -0.720 | 6                                           | 0.793  | -0.486 | -0.402 |
| 6                                           | -0.927 | -1.138 | -2.274 | 6                                           | -0.616 | -1.950 | -1.620 |
| 6                                           | -3.044 | 0.042  | 0.383  | 6                                           | -2.969 | -1.514 | 1.059  |
| 6                                           | -0.988 | 2.331  | -0.001 | 6                                           | -2.531 | 1.364  | -0.022 |
| 6                                           | 1.595  | 1.397  | -0.385 | 6                                           | 0.127  | 1.899  | -0.602 |
| 6                                           | 1.989  | -1.555 | 0.001  | 6                                           | 2.097  | -0.187 | 0.237  |
| 6                                           | 0.074  | 3.217  | 0.068  | 6                                           | -2.135 | 2.669  | -0.260 |
| 6                                           | 1.365  | 2.740  | -0.137 | 6                                           | -0.801 | 2.927  | -0.560 |
| 6                                           | -3.360 | 0.862  | 1.573  | 6                                           | -3.654 | -0.734 | 2.114  |
| 6                                           | 2.401  | -1.091 | 1.255  | 6                                           | 2.180  | 0.659  | 1.350  |
| 6                                           | 2.650  | -2.654 | -0.562 | 6                                           | 3.265  | -0.793 | -0.241 |
| 6                                           | 3.447  | -1.710 | 1.930  | 6                                           | 3.399  | 0.889  | 1.974  |
| 6                                           | 3.701  | -3.262 | 0.107  | 6                                           | 4.483  | -0.552 | 0.378  |
| 6                                           | 4.103  | -2.792 | 1.355  | 6                                           | 4.554  | 0.288  | 1.486  |
| 1                                           | -1.269 | -1.857 | -3.018 | 1                                           | -0.510 | -2.888 | -2.166 |
| 1                                           | -0.646 | -0.210 | -2.796 | 1                                           | -0.899 | -1.166 | -2.338 |
| 1                                           | -2.001 | 2.694  | 0.124  | 1                                           | -3.573 | 1.147  | 0.179  |
| 1                                           | 2.609  | 1.043  | -0.531 | 1                                           | 1.165  | 2.120  | -0.824 |
| 1                                           | -0.096 | 4.269  | 0.260  | 1                                           | -2.854 | 3.479  | -0.232 |
| 1                                           | -3.753 | 1.846  | 1.299  | 1                                           | -4.537 | -0.210 | 1.736  |
| 1                                           | -4.133 | 0.354  | 2.151  | 1                                           | -3.989 | -1.422 | 2.890  |
| 1                                           | -2.478 | 1.019  | 2.198  | 1                                           | -2.993 | 0.012  | 2.562  |
| 1                                           | 1.888  | -0.253 | 1.716  | 1                                           | 1.281  | 1.125  | 1.742  |
| 1                                           | 2.318  | -3.015 | -1.529 | 1                                           | 3.211  | -1.454 | -1.099 |
| 1                                           | 3.747  | -1.346 | 2.907  | 1                                           | 3.446  | 1.537  | 2.843  |
| 1                                           | 4.211  | -4.106 | -0.346 | 1                                           | 5.382  | -1.022 | -0.009 |
| 1                                           | 4.925  | -3.270 | 1.879  | 1                                           | 5.509  | 0.473  | 1.969  |
| 8                                           | -6.026 | -1.003 | 1.685  | 8                                           | 2.460  | -3.842 | -1.550 |
| 1                                           | -5.422 | -1.163 | 0.936  | 1                                           | 2.282  | -4.610 | -1.004 |
| 1                                           | -6.474 | -1.840 | 1.819  | 1                                           | 1.859  | -3.156 | -1.209 |
| Alprazolam<br>motif 3, Eint = -8.4 kcal/mol |        |        |        | Alprazolam<br>motif 4, Eint = -3.9 kcal/mol |        |        |        |
| 17                                          | 3.261  | 3.232  | -1.062 | 17                                          | 2.586  | -3.148 | -0.549 |
| 7                                           | -1.882 | 0.683  | 0.396  | 7                                           | 0.313  | 2.293  | 0.042  |
| 7                                           | -0.606 | -1.686 | -0.935 | 7                                           | -2.040 | 0.993  | -1.303 |
| 7                                           | -3.649 | -0.606 | 0.172  | 7                                           | -0.839 | 4.094  | -0.507 |

|                                              |        |        |        |                                              |        |        |        |
|----------------------------------------------|--------|--------|--------|----------------------------------------------|--------|--------|--------|
| 7                                            | -3.848 | 0.211  | 1.263  | 7                                            | -0.083 | 4.381  | 0.611  |
| 6                                            | -0.641 | 1.274  | 0.072  | 6                                            | 0.838  | 0.989  | -0.076 |
| 6                                            | 0.439  | 0.469  | -0.337 | 6                                            | -0.008 | -0.086 | -0.409 |
| 6                                            | -2.480 | -0.320 | -0.335 | 6                                            | -0.597 | 2.855  | -0.831 |
| 6                                            | 0.364  | -1.021 | -0.423 | 6                                            | -1.478 | 0.061  | -0.622 |
| 6                                            | -1.760 | -0.961 | -1.459 | 6                                            | -1.201 | 2.026  | -1.900 |
| 6                                            | -2.797 | 0.982  | 1.389  | 6                                            | 0.606  | 3.313  | 0.929  |
| 6                                            | -0.502 | 2.661  | 0.141  | 6                                            | 2.203  | 0.776  | 0.124  |
| 6                                            | 1.638  | 1.102  | -0.682 | 6                                            | 0.565  | -1.356 | -0.545 |
| 6                                            | 1.519  | -1.795 | 0.100  | 6                                            | -2.365 | -0.969 | -0.022 |
| 6                                            | 0.695  | 3.271  | -0.194 | 6                                            | 2.759  | -0.487 | -0.004 |
| 6                                            | 1.759  | 2.481  | -0.616 | 6                                            | 1.923  | -1.542 | -0.351 |
| 6                                            | -2.598 | 1.981  | 2.462  | 6                                            | 1.514  | 3.199  | 2.092  |
| 6                                            | 2.332  | -1.302 | 1.127  | 6                                            | -2.005 | -1.662 | 1.139  |
| 6                                            | 1.776  | -3.074 | -0.409 | 6                                            | -3.617 | -1.221 | -0.596 |
| 6                                            | 3.376  | -2.068 | 1.632  | 6                                            | -2.874 | -2.584 | 1.712  |
| 6                                            | 2.826  | -3.831 | 0.087  | 6                                            | -4.477 | -2.149 | -0.031 |
| 6                                            | 3.629  | -3.332 | 1.110  | 6                                            | -4.109 | -2.834 | 1.126  |
| 1                                            | -2.436 | -1.656 | -1.959 | 1                                            | -1.813 | 2.663  | -2.537 |
| 1                                            | -1.450 | -0.193 | -2.185 | 1                                            | -0.406 | 1.581  | -2.521 |
| 1                                            | -1.349 | 3.267  | 0.437  | 1                                            | 2.844  | 1.618  | 0.359  |
| 1                                            | 2.483  | 0.502  | -1.003 | 1                                            | -0.066 | -2.199 | -0.802 |
| 1                                            | 0.799  | 4.348  | -0.148 | 1                                            | 3.821  | -0.649 | 0.144  |
| 1                                            | -2.846 | 2.996  | 2.136  | 1                                            | 2.564  | 3.342  | 1.816  |
| 1                                            | -3.257 | 1.734  | 3.293  | 1                                            | 1.256  | 3.977  | 2.809  |
| 1                                            | -1.565 | 1.991  | 2.819  | 1                                            | 1.430  | 2.225  | 2.579  |
| 1                                            | 2.137  | -0.320 | 1.546  | 1                                            | -1.046 | -1.467 | 1.609  |
| 1                                            | 1.134  | -3.453 | -1.197 | 1                                            | -3.894 | -0.671 | -1.489 |
| 1                                            | 3.991  | -1.678 | 2.436  | 1                                            | -2.585 | -3.104 | 2.619  |
| 1                                            | 3.021  | -4.817 | -0.324 | 1                                            | -5.440 | -2.342 | -0.492 |
| 1                                            | 4.450  | -3.927 | 1.498  | 1                                            | -4.785 | -3.558 | 1.568  |
| 8                                            | -4.778 | -2.275 | -1.865 | 8                                            | 5.638  | -1.909 | 0.112  |
| 1                                            | -4.643 | -1.780 | -1.037 | 1                                            | 6.418  | -2.243 | 0.559  |
| 1                                            | -5.249 | -3.066 | -1.598 | 1                                            | 5.115  | -2.692 | -0.086 |
| Amodiaquine<br>motif 1, Eint = -2.7 kcal/mol |        |        |        | Amodiaquine<br>motif 2, Eint = -8.2 kcal/mol |        |        |        |
| 17                                           | -6.571 | -0.526 | 1.014  | 17                                           | -6.688 | -0.640 | 1.129  |
| 8                                            | 5.559  | -2.114 | -0.484 | 8                                            | 5.399  | -2.144 | -0.741 |
| 7                                            | 3.883  | 1.622  | 0.414  | 7                                            | 3.782  | 1.495  | 0.568  |
| 7                                            | 0.039  | -1.671 | 0.049  | 7                                            | -0.104 | -1.711 | -0.053 |
| 7                                            | -2.512 | 1.394  | -1.364 | 7                                            | -2.645 | 1.503  | -1.060 |
| 6                                            | 4.578  | 0.352  | 0.273  | 6                                            | 4.461  | 0.239  | 0.290  |
| 6                                            | 3.657  | -0.807 | 0.001  | 6                                            | 3.523  | -0.878 | -0.082 |
| 6                                            | 3.451  | 2.124  | -0.893 | 6                                            | 3.336  | 2.129  | -0.676 |
| 6                                            | 4.701  | 2.605  | 1.123  | 6                                            | 4.623  | 2.394  | 1.357  |
| 6                                            | 2.280  | -0.703 | 0.145  | 6                                            | 2.150  | -0.778 | 0.101  |
| 6                                            | 1.434  | -1.782 | -0.122 | 6                                            | 1.288  | -1.816 | -0.261 |
| 6                                            | 4.197  | -2.044 | -0.378 | 6                                            | 4.041  | -2.073 | -0.600 |
| 6                                            | 2.317  | 3.125  | -0.795 | 6                                            | 2.217  | 3.128  | -0.460 |
| 6                                            | 4.785  | 2.344  | 2.614  | 6                                            | 4.728  | 1.985  | 2.812  |
| 6                                            | 1.989  | -3.002 | -0.502 | 6                                            | 1.821  | -2.994 | -0.778 |
| 6                                            | -0.768 | -0.651 | -0.402 | 6                                            | -0.910 | -0.647 | -0.370 |
| 6                                            | 3.368  | -3.134 | -0.615 | 6                                            | 3.195  | -3.125 | -0.933 |
| 6                                            | -2.152 | -0.638 | -0.027 | 6                                            | -2.288 | -0.669 | 0.027  |
| 6                                            | -2.975 | 0.401  | -0.557 | 6                                            | -3.113 | 0.428  | -0.363 |
| 6                                            | -0.321 | 0.375  | -1.221 | 6                                            | -0.465 | 0.463  | -1.078 |
| 6                                            | -2.732 | -1.589 | 0.839  | 6                                            | -2.865 | -1.712 | 0.783  |
| 6                                            | -4.353 | 0.425  | -0.231 | 6                                            | -4.485 | 0.423  | -0.016 |
| 6                                            | -1.228 | 1.351  | -1.656 | 6                                            | -1.366 | 1.486  | -1.384 |
| 6                                            | -4.069 | -1.552 | 1.155  | 6                                            | -4.197 | -1.702 | 1.119  |
| 6                                            | -4.867 | -0.538 | 0.598  | 6                                            | -5.001 | -0.627 | 0.701  |
| 1                                            | 5.134  | 0.146  | 1.195  | 1                                            | 5.027  | -0.064 | 1.178  |
| 1                                            | 5.352  | 0.392  | -0.519 | 1                                            | 5.224  | 0.349  | -0.505 |
| 1                                            | 4.306  | 2.556  | -1.449 | 1                                            | 4.187  | 2.603  | -1.202 |
| 1                                            | 3.118  | 1.263  | -1.483 | 1                                            | 2.982  | 1.334  | -1.342 |
| 1                                            | 5.716  | 2.664  | 0.684  | 1                                            | 5.631  | 2.488  | 0.907  |
| 1                                            | 4.249  | 3.587  | 0.962  | 1                                            | 4.179  | 3.392  | 1.302  |
| 1                                            | 1.874  | 0.243  | 0.485  | 1                                            | 1.762  | 0.131  | 0.548  |
| 1                                            | 1.459  | 2.688  | -0.277 | 1                                            | 1.365  | 2.653  | 0.033  |
| 1                                            | 2.604  | 4.030  | -0.254 | 1                                            | 2.527  | 3.974  | 0.158  |
| 1                                            | 1.990  | 3.435  | -1.791 | 1                                            | 1.875  | 3.536  | -1.415 |
| 1                                            | 3.787  | 2.327  | 3.059  | 1                                            | 3.739  | 1.935  | 3.272  |
| 1                                            | 5.267  | 1.391  | 2.845  | 1                                            | 5.202  | 1.008  | 2.938  |
| 1                                            | 5.367  | 3.125  | 3.108  | 1                                            | 5.329  | 2.707  | 3.371  |
| 1                                            | -0.433 | -2.526 | 0.297  | 1                                            | -0.577 | -2.578 | 0.150  |
| 1                                            | 1.345  | -3.850 | -0.715 | 1                                            | 1.163  | -3.809 | -1.065 |
| 1                                            | 3.800  | -4.088 | -0.905 | 1                                            | 3.611  | -4.048 | -1.330 |
| 1                                            | 0.708  | 0.412  | -1.556 | 1                                            | 0.558  | 0.529  | -1.425 |
| 1                                            | -2.120 | -2.358 | 1.303  | 1                                            | -2.255 | -2.535 | 1.141  |
| 1                                            | -4.972 | 1.213  | -0.649 | 1                                            | -5.100 | 1.260  | -0.331 |
| 1                                            | 5.805  | -3.000 | -0.765 | 1                                            | 5.631  | -2.998 | -1.117 |
| 1                                            | -0.861 | 2.145  | -2.306 | 1                                            | -1.007 | 2.346  | -1.950 |
| 1                                            | -4.507 | -2.278 | 1.828  | 1                                            | -4.632 | -2.502 | 1.706  |
| 8                                            | -7.104 | 2.285  | -0.737 | 8                                            | -4.832 | 3.302  | -1.611 |

|                                              |        |        |        |                                                     |        |        |        |
|----------------------------------------------|--------|--------|--------|-----------------------------------------------------|--------|--------|--------|
| 1                                            | -7.281 | 1.587  | -0.096 | 1                                                   | -4.659 | 4.161  | -1.222 |
| 1                                            | -7.263 | 3.098  | -0.252 | 1                                                   | -3.999 | 2.806  | -1.490 |
| Amodiaquine<br>motif 3, Eint = -5.0 kcal/mol |        |        |        | Estradiol<br>motif 1, Eint = -6.8 kcal/mol          |        |        |        |
| 17                                           | 7.241  | -0.153 | 0.624  | 8                                                   | 4.706  | 0.420  | -0.040 |
| 8                                            | -4.838 | 2.257  | 0.215  | 8                                                   | -6.192 | 0.672  | 0.444  |
| 7                                            | -3.320 | -1.639 | 0.561  | 6                                                   | 2.282  | 0.071  | -0.007 |
| 7                                            | 0.672  | 1.474  | 0.281  | 6                                                   | 1.443  | -1.170 | -0.364 |
| 7                                            | 2.914  | -1.588 | -1.590 | 6                                                   | -0.010 | -1.041 | 0.053  |
| 6                                            | -3.946 | -0.330 | 0.661  | 6                                                   | -0.618 | 0.190  | -0.644 |
| 6                                            | -2.984 | 0.808  | 0.441  | 6                                                   | 3.641  | -0.406 | -0.523 |
| 6                                            | -3.055 | -1.976 | -0.842 | 6                                                   | 1.690  | 1.283  | -0.720 |
| 6                                            | -4.127 | -2.666 | 1.220  | 6                                                   | 2.281  | -2.346 | 0.143  |
| 6                                            | -1.608 | 0.618  | 0.456  | 6                                                   | 0.208  | 1.457  | -0.381 |
| 6                                            | -0.720 | 1.676  | 0.243  | 6                                                   | 3.738  | -1.873 | -0.060 |
| 6                                            | -3.471 | 2.107  | 0.245  | 6                                                   | -0.849 | -2.268 | -0.273 |
| 6                                            | -2.004 | -3.057 | -0.998 | 6                                                   | 2.368  | 0.321  | 1.502  |
| 6                                            | -4.049 | -2.604 | 2.732  | 6                                                   | -2.096 | 0.335  | -0.325 |
| 6                                            | -1.227 | 2.960  | 0.051  | 6                                                   | -2.242 | -2.128 | 0.316  |
| 6                                            | 1.378  | 0.453  | -0.320 | 6                                                   | -2.861 | -0.770 | 0.092  |
| 6                                            | -2.600 | 3.174  | 0.062  | 6                                                   | -2.753 | 1.559  | -0.479 |
| 6                                            | 2.779  | 0.328  | -0.053 | 6                                                   | -4.225 | -0.621 | 0.340  |
| 6                                            | 3.495  | -0.704 | -0.734 | 6                                                   | -4.110 | 1.708  | -0.231 |
| 6                                            | 0.809  | -0.463 | -1.192 | 6                                                   | -4.854 | 0.606  | 0.183  |
| 6                                            | 3.481  | 1.158  | 0.848  | 1                                                   | 1.446  | -1.225 | -1.468 |
| 6                                            | 4.886  | -0.835 | -0.512 | 1                                                   | -0.057 | -0.884 | 1.143  |
| 6                                            | 1.618  | -1.444 | -1.780 | 1                                                   | -0.534 | -0.017 | -1.727 |
| 6                                            | 4.832  | 1.014  | 1.055  | 1                                                   | 3.625  | -0.355 | -1.623 |
| 6                                            | 5.527  | 0.012  | 0.355  | 1                                                   | 1.794  | 1.136  | -1.805 |
| 1                                            | -4.386 | -0.220 | 1.658  | 1                                                   | 2.244  | 2.194  | -0.471 |
| 1                                            | -4.796 | -0.231 | -0.040 | 1                                                   | 2.063  | -3.276 | -0.388 |
| 1                                            | -3.990 | -2.256 | -1.362 | 1                                                   | 2.074  | -2.536 | 1.202  |
| 1                                            | -2.711 | -1.064 | -1.340 | 1                                                   | 0.087  | 1.755  | 0.668  |
| 1                                            | -5.181 | -2.614 | 0.884  | 1                                                   | -0.185 | 2.290  | -0.970 |
| 1                                            | -3.755 | -3.639 | 0.887  | 1                                                   | 4.309  | -1.912 | 0.873  |
| 1                                            | -1.239 | -0.383 | 0.652  | 1                                                   | 4.280  | -2.489 | -0.783 |
| 1                                            | -1.077 | -2.772 | -0.492 | 1                                                   | -0.373 | -3.179 | 0.106  |
| 1                                            | -2.324 | -4.017 | -0.585 | 1                                                   | -0.904 | -2.380 | -1.366 |
| 1                                            | -1.778 | -3.222 | -2.055 | 1                                                   | 2.980  | 1.206  | 1.697  |
| 1                                            | -3.014 | -2.697 | 3.069  | 1                                                   | 1.386  | 0.502  | 1.942  |
| 1                                            | -4.445 | -1.668 | 3.134  | 1                                                   | 2.820  | -0.516 | 2.039  |
| 1                                            | -4.628 | -3.415 | 3.179  | 1                                                   | -2.190 | -2.306 | 1.400  |
| 1                                            | 1.215  | 2.278  | 0.553  | 1                                                   | -2.912 | -2.903 | -0.071 |
| 1                                            | -0.551 | 3.793  | -0.117 | 1                                                   | 5.521  | 0.145  | -0.468 |
| 1                                            | -2.995 | 4.175  | -0.091 | 1                                                   | -2.195 | 2.430  | -0.805 |
| 1                                            | -0.241 | -0.410 | -1.452 | 1                                                   | -4.817 | -1.473 | 0.663  |
| 1                                            | 2.954  | 1.914  | 1.422  | 1                                                   | -4.590 | 2.675  | -0.360 |
| 1                                            | 5.415  | -1.617 | -1.042 | 1                                                   | -6.493 | 1.571  | 0.288  |
| 1                                            | -5.049 | 3.192  | 0.133  | 8                                                   | 4.380  | 3.220  | 0.461  |
| 1                                            | 1.156  | -2.151 | -2.469 | 1                                                   | 4.710  | 3.345  | 1.353  |
| 1                                            | 5.362  | 1.649  | 1.754  | 1                                                   | 4.537  | 2.279  | 0.281  |
| 8                                            | -4.477 | 1.026  | -2.594 |                                                     |        |        |        |
| 1                                            | -4.918 | 1.322  | -1.790 |                                                     |        |        |        |
| 1                                            | -3.560 | 1.273  | -2.444 |                                                     |        |        |        |
| Estradiol<br>motif 2, Eint = -5.0 kcal/mol   |        |        |        | Diethylstilbestrol<br>motif 1, Eint = -4.7 kcal/mol |        |        |        |
| 8                                            | -5.409 | -0.846 | 0.311  | 8                                                   | 5.538  | 0.590  | -0.525 |
| 8                                            | 5.480  | -0.843 | 0.299  | 8                                                   | -6.498 | -0.547 | 0.178  |
| 6                                            | -3.016 | -0.430 | 0.172  | 6                                                   | 0.002  | -0.465 | 0.064  |
| 6                                            | -2.224 | 0.756  | -0.405 | 6                                                   | -0.932 | 0.501  | 0.240  |
| 6                                            | -0.752 | 0.712  | -0.041 | 6                                                   | -0.322 | -1.938 | 0.014  |
| 6                                            | -0.148 | -0.597 | -0.585 | 6                                                   | -0.594 | 1.957  | 0.449  |
| 6                                            | -4.413 | -0.062 | -0.331 | 6                                                   | 1.446  | -0.154 | -0.081 |
| 6                                            | -2.433 | -1.723 | -0.388 | 6                                                   | -2.386 | 0.206  | 0.256  |
| 6                                            | -3.066 | 1.980  | -0.038 | 6                                                   | -0.009 | -2.581 | -1.333 |
| 6                                            | -0.932 | -1.828 | -0.109 | 6                                                   | -1.101 | 2.862  | -0.669 |
| 6                                            | -4.519 | 1.455  | -0.070 | 6                                                   | 2.410  | -0.778 | 0.724  |
| 6                                            | 0.046  | 1.892  | -0.574 | 6                                                   | -3.207 | 0.643  | 1.301  |
| 6                                            | -3.021 | -0.459 | 1.703  | 6                                                   | 1.905  | 0.727  | -1.065 |
| 6                                            | 1.346  | -0.673 | -0.322 | 6                                                   | -3.006 | -0.468 | -0.806 |
| 6                                            | 1.466  | 1.858  | -0.035 | 6                                                   | 3.765  | -0.519 | 0.581  |
| 6                                            | 2.103  | 0.492  | -0.095 | 6                                                   | -4.574 | 0.398  | 1.303  |
| 6                                            | 2.021  | -1.896 | -0.341 | 6                                                   | 3.258  | 0.993  | -1.231 |
| 6                                            | 3.480  | 0.403  | 0.107  | 6                                                   | -4.370 | -0.714 | -0.823 |
| 6                                            | 3.392  | -1.988 | -0.139 | 6                                                   | 4.186  | 0.370  | -0.404 |
| 6                                            | 4.120  | -0.827 | 0.088  | 6                                                   | -5.162 | -0.282 | 0.239  |
| 1                                            | -2.277 | 0.646  | -1.503 | 1                                                   | 0.271  | -2.447 | 0.786  |
| 1                                            | -0.655 | 0.710  | 1.058  | 1                                                   | -1.367 | -2.108 | 0.282  |
| 1                                            | -0.285 | -0.546 | -1.682 | 1                                                   | 0.483  | 2.085  | 0.582  |
| 1                                            | -4.440 | -0.254 | -1.418 | 1                                                   | -1.052 | 2.285  | 1.392  |
| 1                                            | -2.597 | -1.739 | -1.475 | 1                                                   | -0.598 | -2.129 | -2.137 |
| 1                                            | -2.957 | -2.595 | 0.018  | 1                                                   | -0.225 | -3.652 | -1.324 |
| 1                                            | -2.905 | 2.816  | -0.724 | 1                                                   | 1.046  | -2.456 | -1.596 |
| 1                                            | -2.801 | 2.344  | 0.961  | 1                                                   | -0.869 | 3.911  | -0.470 |

|                               |        |        |        |                               |        |        |        |
|-------------------------------|--------|--------|--------|-------------------------------|--------|--------|--------|
| 1                             | -0.750 | -1.977 | 0.964  | 1                             | -2.185 | 2.777  | -0.787 |
| 1                             | -0.550 | -2.728 | -0.599 | 1                             | -0.651 | 2.598  | -1.631 |
| 1                             | -5.025 | 1.612  | 0.888  | 1                             | 2.092  | -1.467 | 1.500  |
| 1                             | -5.127 | 1.955  | -0.830 | 1                             | -2.769 | 1.170  | 2.143  |
| 1                             | -0.433 | 2.840  | -0.305 | 1                             | 1.184  | 1.204  | -1.723 |
| 1                             | 0.052  | 1.851  | -1.673 | 1                             | -2.398 | -0.793 | -1.645 |
| 1                             | -3.676 | -1.258 | 2.055  | 1                             | 4.503  | -0.988 | 1.224  |
| 1                             | -2.025 | -0.634 | 2.114  | 1                             | -5.188 | 0.736  | 2.135  |
| 1                             | -3.392 | 0.474  | 2.134  | 1                             | 3.592  | 1.676  | -2.008 |
| 1                             | 1.458  | 2.185  | 1.014  | 1                             | -4.839 | -1.230 | -1.654 |
| 1                             | 2.104  | 2.579  | -0.555 | 1                             | 5.690  | 1.267  | -1.190 |
| 1                             | -6.261 | -0.618 | -0.069 | 1                             | -6.921 | -0.196 | 0.968  |
| 1                             | 1.469  | -2.812 | -0.521 | 8                             | 6.963  | -0.709 | 1.648  |
| 1                             | 4.070  | 1.301  | 0.273  | 1                             | 6.675  | -0.196 | 0.881  |
| 1                             | 3.888  | -2.955 | -0.157 | 1                             | 7.653  | -1.280 | 1.305  |
| 1                             | 5.806  | -1.740 | 0.178  |                               |        |        |        |
| 8                             | 6.575  | 1.847  | 0.259  |                               |        |        |        |
| 1                             | 7.075  | 1.981  | 1.066  |                               |        |        |        |
| 1                             | 6.379  | 0.901  | 0.258  |                               |        |        |        |
| Diethylstilbestrol            |        |        |        | Doxepin                       |        |        |        |
| motif 2, Eint = -4.7 kcal/mol |        |        |        | motif 1, Eint = -6.0 kcal/mol |        |        |        |
| 8                             | 6.489  | 0.056  | 0.368  | 8                             | 2.604  | -0.027 | 1.237  |
| 8                             | -5.588 | -0.183 | -0.497 | 7                             | -4.765 | -0.032 | 0.557  |
| 6                             | 0.893  | 0.356  | -0.449 | 6                             | 0.014  | -0.530 | -0.372 |
| 6                             | 0.051  | -0.691 | -0.275 | 6                             | 0.258  | 0.923  | -0.537 |
| 6                             | 0.436  | 1.725  | -0.891 | 6                             | 1.203  | -1.417 | -0.268 |
| 6                             | 0.519  | -2.096 | 0.016  | 6                             | 0.995  | 1.606  | 0.440  |
| 6                             | 2.356  | 0.243  | -0.230 | 6                             | -2.522 | -0.320 | -0.492 |
| 6                             | -1.423 | -0.548 | -0.368 | 6                             | -1.227 | -1.051 | -0.371 |
| 6                             | 0.670  | 2.809  | 0.157  | 6                             | -3.521 | -0.787 | 0.562  |
| 6                             | 0.078  | -2.609 | 1.384  | 6                             | 1.503  | 0.822  | 1.604  |
| 6                             | 3.274  | 0.646  | -1.210 | 6                             | 2.380  | -1.131 | 0.455  |
| 6                             | -2.182 | -1.376 | -1.201 | 6                             | -0.212 | 1.629  | -1.646 |
| 6                             | 2.877  | -0.214 | 0.985  | 6                             | 1.242  | 2.970  | 0.307  |
| 6                             | -2.117 | 0.378  | 0.423  | 6                             | 1.189  | -2.626 | -0.988 |
| 6                             | 4.643  | 0.572  | -1.005 | 6                             | 3.463  | -2.013 | 0.433  |
| 6                             | -3.566 | -1.268 | -1.266 | 6                             | 0.038  | 2.991  | -1.776 |
| 6                             | 4.246  | -0.287 | 1.210  | 6                             | 0.763  | 3.665  | -0.799 |
| 6                             | -3.499 | 0.496  | 0.380  | 6                             | 2.256  | -3.507 | -1.002 |
| 6                             | 5.135  | 0.103  | 0.212  | 6                             | 3.409  | -3.192 | -0.287 |
| 6                             | -4.221 | -0.331 | -0.474 | 6                             | -5.566 | -0.370 | 1.717  |
| 1                             | 0.993  | 1.997  | -1.798 | 6                             | -5.528 | -0.238 | -0.659 |
| 1                             | -0.616 | 1.702  | -1.184 | 1                             | -2.942 | -0.495 | -1.492 |
| 1                             | 1.604  | -2.166 | -0.083 | 1                             | -2.382 | 0.761  | -0.404 |
| 1                             | 0.105  | -2.764 | -0.752 | 1                             | -1.314 | -2.129 | -0.226 |
| 1                             | 0.111  | 2.601  | 1.075  | 1                             | -3.709 | -1.875 | 0.437  |
| 1                             | 0.357  | 3.790  | -0.207 | 1                             | -3.070 | -0.669 | 1.554  |
| 1                             | 1.727  | 2.875  | 0.430  | 1                             | 1.913  | 1.472  | 2.379  |
| 1                             | 0.403  | -3.639 | 1.548  | 1                             | 0.714  | 0.199  | 2.047  |
| 1                             | -1.011 | -2.583 | 1.485  | 1                             | -0.770 | 1.101  | -2.413 |
| 1                             | 0.491  | -1.996 | 2.191  | 1                             | 1.816  | 3.482  | 1.073  |
| 1                             | 2.909  | 1.009  | -2.166 | 1                             | 0.308  | -2.844 | -1.583 |
| 1                             | -1.684 | -2.109 | -1.829 | 1                             | 4.340  | -1.747 | 1.013  |
| 1                             | 2.192  | -0.505 | 1.775  | 1                             | -0.333 | 3.526  | -2.644 |
| 1                             | -1.554 | 1.011  | 1.103  | 1                             | 0.957  | 4.728  | -0.899 |
| 1                             | 5.344  | 0.872  | -1.775 | 1                             | 2.198  | -4.420 | -1.585 |
| 1                             | -4.135 | -1.911 | -1.933 | 1                             | 4.263  | -3.861 | -0.291 |
| 1                             | 4.625  | -0.639 | 2.167  | 1                             | -5.874 | -1.433 | 1.734  |
| 1                             | -4.028 | 1.204  | 1.009  | 1                             | -6.472 | 0.241  | 1.734  |
| 1                             | 6.689  | -0.283 | 1.245  | 1                             | -5.002 | -0.169 | 2.631  |
| 1                             | -5.970 | -0.856 | -1.067 | 1                             | -6.461 | 0.328  | -0.605 |
| 8                             | -6.429 | 1.587  | 1.646  | 1                             | -5.785 | -1.302 | -0.828 |
| 1                             | -6.352 | 0.971  | 0.906  | 1                             | -4.977 | 0.120  | -1.531 |
| 1                             | -7.001 | 2.283  | 1.317  | 8                             | 4.494  | 2.146  | 0.899  |
|                               |        |        |        | 1                             | 4.055  | 1.288  | 0.975  |
|                               |        |        |        | 1                             | 4.279  | 2.426  | 0.006  |

| Doxepin                        |        |        |        |
|--------------------------------|--------|--------|--------|
| motif 2, Eint = -10.3 kcal/mol |        |        |        |
| 8                              | 2.541  | 0.768  | 1.542  |
| 7                              | -3.914 | -1.049 | 0.312  |
| 6                              | 0.644  | -0.489 | -0.532 |
| 6                              | 0.367  | 0.962  | -0.652 |
| 6                              | 2.044  | -0.887 | -0.236 |
| 6                              | 0.630  | 1.789  | 0.449  |
| 6                              | -1.764 | -1.172 | -0.936 |
| 6                              | -0.312 | -1.421 | -0.705 |
| 6                              | -2.597 | -1.681 | 0.243  |
| 6                              | 1.166  | 1.144  | 1.684  |
| 6                              | 2.882  | -0.255 | 0.707  |
| 6                              | -0.141 | 1.530  | -1.822 |
| 6                              | 0.371  | 3.154  | 0.373  |
| 6                              | 2.598  | -1.950 | -0.970 |
| 6                              | 4.204  | -0.681 | 0.869  |
| 6                              | -0.401 | 2.895  | -1.891 |
| 6                              | -0.148 | 3.711  | -0.792 |
| 6                              | 3.904  | -2.379 | -0.801 |
| 6                              | 4.715  | -1.730 | 0.126  |
| 6                              | -4.595 | -1.439 | 1.538  |
| 6                              | -4.732 | -1.358 | -0.849 |
| 1                              | -2.092 | -1.659 | -1.865 |
| 1                              | -1.958 | -0.102 | -1.056 |
| 1                              | -0.025 | -2.464 | -0.567 |
| 1                              | -2.683 | -2.785 | 0.208  |
| 1                              | -2.076 | -1.432 | 1.174  |
| 1                              | 1.156  | 1.830  | 2.532  |
| 1                              | 0.570  | 0.261  | 1.950  |
| 1                              | -0.329 | 0.893  | -2.681 |
| 1                              | 0.567  | 3.782  | 1.238  |
| 1                              | 1.971  | -2.420 | -1.721 |
| 1                              | 4.808  | -0.167 | 1.609  |
| 1                              | -0.797 | 3.323  | -2.807 |
| 1                              | -0.350 | 4.776  | -0.844 |
| 1                              | 4.290  | -3.195 | -1.401 |
| 1                              | 5.745  | -2.040 | 0.271  |
| 1                              | -4.778 | -2.526 | 1.595  |
| 1                              | -5.558 | -0.928 | 1.605  |
| 1                              | -3.992 | -1.146 | 2.401  |
| 1                              | -5.705 | -0.872 | -0.751 |
| 1                              | -4.901 | -2.443 | -0.970 |
| 1                              | -4.262 | -0.983 | -1.760 |
| 8                              | -2.531 | 1.299  | 1.366  |
| 1                              | -2.175 | 1.917  | 0.722  |
| 1                              | -3.127 | 0.724  | 0.853  |

## 5. The Python script for calculating the four Lipinski's parameters with description.

```
import pandas as pd
from rdkit import Chem
from rdkit.Chem import rdMolDescriptors, Lipinski
```

This imports necessary libraries for working with chemical structures and data analysis. pandas is for data manipulation, and rdkit is a cheminformatics toolkit.



|                                                                                                                                                                                                                                                                                                                                                                                                                                                                                                                                                                                                                                                                                                                                                   |                                                                                                                                                                                                                                                                                                                                                                                      |
|---------------------------------------------------------------------------------------------------------------------------------------------------------------------------------------------------------------------------------------------------------------------------------------------------------------------------------------------------------------------------------------------------------------------------------------------------------------------------------------------------------------------------------------------------------------------------------------------------------------------------------------------------------------------------------------------------------------------------------------------------|--------------------------------------------------------------------------------------------------------------------------------------------------------------------------------------------------------------------------------------------------------------------------------------------------------------------------------------------------------------------------------------|
| <pre> csv_file_path = r"Path/to/input.csv" data = pd.read_csv(csv_file_path) </pre>                                                                                                                                                                                                                                                                                                                                                                                                                                                                                                                                                                                                                                                               | <p>This reads the CSV file containing chemical information (SMILES representations) into a Pandas DataFrame.</p>                                                                                                                                                                                                                                                                     |
| <pre> def validate_lipinski_rule_of_five(molecule_smiles):     molecule = Chem.MolFromSmiles(molecule_smiles)     if molecule is None:         return False, "Invalid SMILES representation of the molecule."      mw = rdMolDescriptors.CalcExactMolWt(molecule)     logp = rdMolDescriptors.CalcCrippenDescriptors(molecule)[0]     hbd = Lipinski.NumHDonors(molecule)     hba = Lipinski.NumHAcceptors(molecule)      criteria_violated = 0     if mw &gt; 500:         criteria_violated += 1     if logp &gt;= 5:         criteria_violated += 1     if hbd &gt;= 5:         criteria_violated += 1     if hba &gt;= 10:         criteria_violated += 1      return criteria_violated &lt;= 1, criteria_violated, mw, logp, hbd, hba </pre> | <p>The function, <b>validate_lipinski_rule_of_five</b>, takes SMILES representation of a molecule as input, converts it to an RDKit molecule object, and calculates various molecular descriptors. It checks if the molecule violates Lipinski's Rule of Five and returns a tuple with a boolean indicating pass/fail, the number of violations, and the calculated descriptors.</p> |

|                                                                                                                                                                                                                                                                                                                                                                                                                                                                                                  |                                                                                                                                                                                                                                        |
|--------------------------------------------------------------------------------------------------------------------------------------------------------------------------------------------------------------------------------------------------------------------------------------------------------------------------------------------------------------------------------------------------------------------------------------------------------------------------------------------------|----------------------------------------------------------------------------------------------------------------------------------------------------------------------------------------------------------------------------------------|
| <pre> pass_results = [] violations_results = [] mw_results = [] logp_results = [] hbd_results = [] hba_results = []  for index, row in data.iterrows():     compound_smiles = row['SMILES']      is_pass, violations, mw, logp, hbd, hba =     validate_lipinski_rule_of_five(compound_smiles)     pass_results.append(is_pass)     violations_results.append(violations)     mw_results.append(mw)     logp_results.append(logp)     hbd_results.append(hbd)     hba_results.append(hba) </pre> | <p>This loop iterates through each row of the DataFrame (<b>data</b>), extracts the SMILES string for each compound, and applies the <code>validate_lipinski_rule_of_five</code> function. The results are then appended to lists.</p> |
| <pre> data['Pass_Lipinski'] = pass_results data['Violations'] = violations_results data['MW'] = mw_results data['LogP'] = logp_results data['HBD'] = hbd_results data['HBA'] = hba_results </pre>                                                                                                                                                                                                                                                                                                | <p>These lines add new columns to the original DataFrame (<b>data</b>) to store the results.</p>                                                                                                                                       |
| <pre> output_csv_path = r"Path/to/output.csv" data.to_csv(output_csv_path, index=False) print(f"Results saved to {output_csv_path}") </pre>                                                                                                                                                                                                                                                                                                                                                      | <p>The final DataFrame, now containing the results, is saved as a new CSV file at the specified path and prints a message indicating where the results are saved.</p>                                                                  |

6. Table S5. Cartesian coordinates of optimized geometry of 193 FDA approved oral drugs at M06L/6-311++G(d,p) level. Atomic number followed by X, Y, Z coordinates in Å.

|    |                    |        |        |  |   |           |        |        |  |
|----|--------------------|--------|--------|--|---|-----------|--------|--------|--|
|    | cefditoren pivoxil |        |        |  |   | etoposide |        |        |  |
| 16 | 0.883              | -2.629 | 1.182  |  | 8 | -1.589    | 0.468  | -0.738 |  |
| 16 | -3.926             | -2.873 | -1.598 |  | 8 | 0.505     | -2.971 | -1.362 |  |
| 16 | 7.872              | 1.276  | -2.002 |  | 8 | -3.125    | -0.940 | 0.201  |  |
| 8  | 0.042              | 1.393  | -0.258 |  | 8 | -6.748    | -0.692 | 0.431  |  |

|   |                       |        |        |   |              |        |        |
|---|-----------------------|--------|--------|---|--------------|--------|--------|
| 8 | -2.792                | 0.360  | -1.105 | 8 | 2.192        | -2.526 | -2.770 |
| 8 | -3.468                | 0.415  | 1.056  | 8 | -3.537       | 2.415  | -1.227 |
| 8 | 4.007                 | -1.136 | -1.761 | 8 | -6.029       | -2.503 | 1.723  |
| 8 | -3.225                | 2.602  | -0.840 | 8 | -6.157       | 1.314  | -1.531 |
| 8 | 4.027                 | -1.296 | 2.034  | 8 | 0.402        | 5.155  | 0.809  |
| 8 | -5.197                | 2.968  | 0.214  | 8 | 2.407        | 5.135  | -0.327 |
| 7 | -0.552                | -0.905 | -0.322 | 8 | 6.331        | -2.481 | -0.799 |
| 7 | 2.669                 | -0.403 | -0.081 | 8 | 4.552        | -0.202 | 2.971  |
| 7 | 5.186                 | -0.723 | 1.512  | 8 | 6.525        | -1.893 | 1.742  |
| 7 | 7.326                 | 0.538  | 0.423  | 6 | 0.331        | -0.936 | -0.217 |
| 7 | -5.864                | -1.232 | -2.017 | 6 | 1.099        | -0.725 | -1.507 |
| 7 | 9.405                 | 1.628  | 0.234  | 6 | -0.439       | 0.318  | 0.137  |
| 6 | 0.553                 | -1.846 | -0.427 | 6 | 2.239        | 0.274  | -1.316 |
| 6 | 1.465                 | -0.646 | -0.804 | 6 | 0.429        | 1.549  | -0.022 |
| 6 | 0.257                 | 0.229  | -0.442 | 6 | 1.642        | 1.540  | -0.724 |
| 6 | -1.748                | -1.116 | 0.359  | 6 | -0.407       | -2.228 | -0.516 |
| 6 | -0.832                | -3.238 | 1.333  | 6 | 1.384        | -2.133 | -1.972 |
| 6 | -1.932                | -2.234 | 1.104  | 6 | -2.822       | 0.416  | -0.117 |
| 6 | -2.769                | -0.040 | 0.189  | 6 | 3.384        | -0.275 | -0.477 |
| 6 | -3.208                | -2.585 | 1.719  | 6 | -3.832       | 1.045  | -1.077 |
| 6 | 3.884                 | -0.710 | -0.625 | 6 | -5.461       | -0.548 | -0.150 |
| 6 | 5.081                 | -0.431 | 0.255  | 6 | -5.244       | 0.900  | -0.540 |
| 6 | -4.428                | -2.551 | 1.154  | 6 | -4.395       | -1.022 | 0.826  |
| 6 | -3.706                | 1.409  | -1.403 | 6 | -0.068       | 2.746  | 0.539  |
| 6 | -3.252                | 4.295  | 0.827  | 6 | 2.390        | 2.727  | -0.858 |
| 6 | -4.763                | -2.217 | -0.221 | 6 | -4.705       | -2.452 | 1.215  |
| 6 | 6.246                 | 0.198  | -0.364 | 6 | 0.679        | 3.884  | 0.389  |
| 6 | -4.037                | 3.243  | 0.063  | 6 | 1.889        | 3.873  | -0.296 |
| 6 | -4.235                | 5.227  | 1.529  | 6 | 3.491        | -0.017 | 0.885  |
| 6 | -2.403                | 3.544  | 1.865  | 6 | 4.332        | -1.105 | -1.088 |
| 6 | -2.334                | 5.086  | -0.108 | 6 | -6.979       | -2.047 | 0.782  |
| 6 | -5.763                | -1.372 | -0.654 | 6 | 5.347        | -1.656 | -0.325 |
| 6 | 6.361                 | 0.509  | -1.694 | 6 | 4.521        | -0.564 | 1.656  |
| 6 | -6.668                | -0.589 | 0.231  | 6 | 1.585        | 5.905  | 0.548  |
| 6 | 8.247                 | 1.104  | -0.289 | 6 | 5.471        | -1.383 | 1.046  |
| 6 | -4.975                | -1.957 | -2.625 | 6 | -8.343       | -2.157 | 1.394  |
| 6 | 4.268                 | -1.656 | 3.390  | 6 | 6.239        | -2.875 | -2.158 |
| 1 | 0.396                 | -2.610 | -1.194 | 6 | 4.943        | -1.177 | 3.931  |
| 1 | 1.703                 | -0.646 | -1.870 | 1 | 1.060        | -1.115 | 0.585  |
| 1 | -0.962                | -4.100 | 0.667  | 1 | 0.402        | -0.311 | -2.254 |
| 1 | -0.916                | -3.631 | 2.351  | 1 | -0.819       | 0.264  | 1.167  |
| 1 | 2.619                 | -0.241 | 0.916  | 1 | 2.648        | 0.519  | -2.304 |
| 1 | -3.145                | -2.934 | 2.749  | 1 | -1.334       | -2.053 | -1.067 |
| 1 | -5.278                | -2.778 | 1.795  | 1 | -0.623       | -2.849 | 0.354  |
| 1 | -4.703                | 1.180  | -1.023 | 1 | -2.814       | 0.998  | 0.828  |
| 1 | -3.696                | 1.490  | -2.489 | 1 | -3.765       | 0.510  | -2.039 |
| 1 | -3.688                | 5.964  | 2.122  | 1 | -5.399       | -1.176 | -1.058 |
| 1 | -4.859                | 5.765  | 0.811  | 1 | -5.339       | 1.527  | 0.365  |
| 1 | -4.901                | 4.674  | 2.194  | 1 | -4.422       | -0.384 | 1.727  |
| 1 | -1.845                | 4.267  | 2.466  | 1 | -1.016       | 2.762  | 1.068  |
| 1 | -1.687                | 2.874  | 1.383  | 1 | 3.336        | 2.725  | -1.387 |
| 1 | -3.030                | 2.952  | 2.537  | 1 | -4.044       | -2.823 | 2.001  |
| 1 | -1.810                | 5.857  | 0.465  | 1 | -4.598       | -3.104 | 0.333  |
| 1 | -2.898                | 5.588  | -0.899 | 1 | 2.783        | 0.631  | 1.391  |
| 1 | -1.586                | 4.444  | -0.576 | 1 | 4.247        | -1.329 | -2.143 |
| 1 | 5.670                 | 0.297  | -2.493 | 1 | -6.874       | -2.655 | -0.138 |
| 1 | -6.449                | 0.482  | 0.170  | 1 | -2.631       | 2.470  | -1.551 |
| 1 | -7.710                | -0.724 | -0.066 | 1 | -7.039       | 1.155  | -1.180 |
| 1 | -6.554                | -0.878 | 1.277  | 1 | 1.319        | 6.848  | 0.063  |
| 1 | -4.874                | -2.016 | -3.703 | 1 | 2.122        | 6.084  | 1.491  |
| 1 | 5.057                 | -2.409 | 3.455  | 1 | -9.101       | -1.813 | 0.690  |
| 1 | 4.548                 | -0.780 | 3.981  | 1 | -8.393       | -1.543 | 2.295  |
| 1 | 3.326                 | -2.068 | 3.751  | 1 | -8.551       | -3.192 | 1.663  |
| 1 | 9.600                 | 1.281  | 1.163  | 1 | 7.030        | -2.428 | 1.115  |
| 1 | 10.214                | 1.613  | -0.369 | 1 | 7.057        | -3.572 | -2.330 |
|   |                       |        |        | 1 | 6.347        | -2.015 | -2.826 |
|   |                       |        |        | 1 | 5.283        | -3.369 | -2.362 |
|   |                       |        |        | 1 | 4.519        | -2.158 | 3.693  |
|   |                       |        |        | 1 | 4.540        | -0.834 | 4.885  |
|   |                       |        |        | 1 | 6.028        | -1.270 | 4.003  |
|   | candesartan cilexetil |        |        |   | dipyridamole |        |        |
| 8 | 2.564                 | -1.930 | -0.115 | 8 | -5.738       | 1.219  | -1.641 |
| 8 | 0.571                 | -2.742 | -0.161 | 8 | -4.942       | -0.945 | 2.535  |
| 8 | 1.928                 | -3.122 | -1.942 | 8 | 5.738        | -1.219 | -1.641 |
| 8 | -1.622                | -3.239 | -0.101 | 8 | 4.941        | 0.945  | 2.535  |
| 8 | -5.219                | 2.454  | -0.719 | 7 | -0.079       | 3.054  | -0.302 |
| 8 | -2.133                | -1.778 | -1.754 | 7 | 0.079        | -3.054 | -0.303 |
| 7 | -4.113                | 0.426  | -0.617 | 7 | -1.868       | 1.614  | -0.102 |
| 7 | -6.023                | 0.672  | 0.586  | 7 | 1.868        | -1.614 | -0.103 |
| 7 | 4.034                 | 3.067  | -0.723 | 7 | -1.668       | -0.774 | -0.086 |
| 7 | 2.003                 | 3.745  | -0.071 | 7 | 1.668        | 0.774  | -0.086 |
| 7 | 3.538                 | 4.046  | -1.465 | 7 | -3.712       | 0.262  | 0.201  |
| 7 | 2.332                 | 4.472  | -1.101 | 7 | 3.712        | -0.262 | 0.201  |
| 6 | 3.912                 | -1.781 | -0.648 | 6 | -1.003       | 4.166  | -0.099 |

|                      |        |        |        |           |        |        |        |
|----------------------|--------|--------|--------|-----------|--------|--------|--------|
| 6                    | 4.817  | -1.618 | 0.554  | 6         | 1.048  | 3.408  | -1.169 |
| 6                    | 3.990  | -0.583 | -1.575 | 6         | 1.003  | -4.166 | -0.101 |
| 6                    | 6.256  | -1.352 | 0.125  | 6         | -1.048 | -3.408 | -1.170 |
| 6                    | 5.428  | -0.350 | -2.025 | 6         | -0.267 | 5.352  | 0.509  |
| 6                    | 6.343  | -0.159 | -0.820 | 6         | 1.843  | 4.553  | -0.566 |
| 6                    | 1.715  | -2.637 | -0.857 | 6         | 0.267  | -5.352 | 0.507  |
| 6                    | -4.305 | -0.778 | 0.051  | 6         | -1.843 | -4.553 | -0.567 |
| 6                    | -2.960 | 0.923  | -1.356 | 6         | 0.943  | 5.757  | -0.324 |
| 6                    | -0.430 | -3.586 | -0.767 | 6         | -0.943 | -5.757 | -0.325 |
| 6                    | -5.497 | -0.590 | 0.794  | 6         | -0.559 | 1.769  | -0.228 |
| 6                    | -3.579 | -1.978 | 0.142  | 6         | 0.559  | -1.770 | -0.229 |
| 6                    | -5.170 | 1.222  | -0.231 | 6         | -0.326 | -0.623 | -0.206 |
| 6                    | -1.684 | 0.938  | -0.557 | 6         | 0.326  | 0.623  | -0.206 |
| 6                    | -5.986 | -1.592 | 1.623  | 6         | -2.359 | 0.357  | 0.007  |
| 6                    | -2.396 | -2.270 | -0.681 | 6         | 2.359  | -0.357 | 0.007  |
| 6                    | -4.084 | -2.956 | 1.014  | 6         | -4.523 | 1.453  | 0.386  |
| 6                    | -1.671 | 1.010  | 0.833  | 6         | -4.352 | -1.040 | 0.237  |
| 6                    | -0.464 | 0.904  | -1.235 | 6         | 4.524  | -1.453 | 0.386  |
| 6                    | -0.139 | -5.035 | -0.502 | 6         | 4.352  | 1.040  | 0.237  |
| 6                    | -5.263 | -2.775 | 1.728  | 6         | -4.913 | 2.123  | -0.913 |
| 6                    | 0.756  | 1.060  | 0.852  | 6         | -4.234 | -1.728 | 1.580  |
| 6                    | -0.467 | 1.060  | 1.527  | 6         | 4.913  | -2.123 | -0.913 |
| 6                    | 0.733  | 0.976  | -0.545 | 6         | 4.234  | 1.728  | 1.580  |
| 6                    | 2.023  | 1.104  | 1.613  | 1         | -1.815 | 3.827  | 0.543  |
| 6                    | -6.341 | 3.244  | -0.264 | 1         | -1.461 | 4.452  | -1.063 |
| 6                    | 3.111  | 1.927  | 1.256  | 1         | 0.643  | 3.720  | -2.148 |
| 6                    | 2.168  | 0.279  | 2.735  | 1         | 1.669  | 2.530  | -1.318 |
| 6                    | 4.295  | 1.885  | 2.003  | 1         | 1.815  | -3.828 | 0.541  |
| 6                    | -6.231 | 4.595  | -0.912 | 1         | 1.461  | -4.452 | -1.064 |
| 6                    | 3.336  | 0.261  | 3.484  | 1         | -0.644 | -3.719 | -2.149 |
| 6                    | 3.042  | 2.889  | 0.153  | 1         | -1.669 | -2.530 | -1.319 |
| 6                    | 4.411  | 1.064  | 3.114  | 1         | -0.964 | 6.189  | 0.617  |
| 1                    | 4.150  | -2.696 | -1.204 | 1         | 0.059  | 5.079  | 1.520  |
| 1                    | 4.443  | -0.773 | 1.143  | 1         | 2.283  | 4.213  | 0.379  |
| 1                    | 4.749  | -2.503 | 1.194  | 1         | 2.672  | 4.811  | -1.233 |
| 1                    | 3.317  | -0.725 | -2.426 | 1         | 0.964  | -6.189 | 0.616  |
| 1                    | 3.648  | 0.300  | -1.019 | 1         | -0.059 | -5.080 | 1.519  |
| 1                    | 6.660  | -2.243 | -0.377 | 1         | -2.283 | -4.213 | 0.379  |
| 1                    | 6.880  | -1.192 | 1.010  | 1         | -2.673 | -4.811 | -1.233 |
| 1                    | 5.475  | 0.520  | -2.688 | 1         | 0.601  | 6.149  | -1.292 |
| 1                    | 5.773  | -1.208 | -2.618 | 1         | 1.492  | 6.569  | 0.161  |
| 1                    | 7.377  | -0.001 | -1.142 | 1         | -0.601 | -6.149 | -1.294 |
| 1                    | 6.038  | 0.752  | -0.286 | 1         | -1.492 | -6.570 | 0.160  |
| 1                    | -2.824 | 0.328  | -2.261 | 1         | -3.984 | 2.171  | 1.009  |
| 1                    | -3.223 | 1.938  | -1.663 | 1         | -5.421 | 1.154  | 0.933  |
| 1                    | -0.496 | -3.338 | -1.828 | 1         | -3.914 | -1.683 | -0.531 |
| 1                    | -6.904 | -1.433 | 2.177  | 1         | -5.406 | -0.896 | -0.015 |
| 1                    | -3.537 | -3.886 | 1.103  | 1         | 5.421  | -1.154 | 0.933  |
| 1                    | -2.606 | 1.028  | 1.386  | 1         | 3.984  | -2.171 | 1.008  |
| 1                    | -0.458 | 0.800  | -2.316 | 1         | 5.405  | 0.896  | -0.015 |
| 1                    | -5.620 | -3.571 | 2.373  | 1         | 3.914  | 1.683  | -0.532 |
| 1                    | 0.807  | -5.312 | -0.969 | 1         | -5.453 | 3.057  | -0.690 |
| 1                    | -0.928 | -5.657 | -0.926 | 1         | -4.007 | 2.380  | -1.477 |
| 1                    | -0.082 | -5.220 | 0.572  | 1         | -4.662 | -2.740 | 1.506  |
| 1                    | -0.476 | 1.128  | 2.611  | 1         | -3.174 | -1.825 | 1.847  |
| 1                    | 1.667  | 0.936  | -1.096 | 1         | 5.453  | -3.057 | -0.690 |
| 1                    | -6.306 | 3.295  | 0.829  | 1         | 4.007  | -2.379 | -1.477 |
| 1                    | -7.263 | 2.719  | -0.534 | 1         | 4.661  | 2.740  | 1.506  |
| 1                    | 1.349  | -0.385 | 2.995  | 1         | 3.173  | 1.825  | 1.847  |
| 1                    | 5.116  | 2.532  | 1.710  | 1         | -5.852 | 1.563  | -2.529 |
| 1                    | -7.062 | 5.226  | -0.594 | 1         | -4.726 | -1.271 | 3.411  |
| 1                    | -6.263 | 4.516  | -2.001 | 1         | 5.853  | -1.563 | -2.529 |
| 1                    | -5.300 | 5.093  | -0.633 | 1         | 4.726  | 1.271  | 3.411  |
| 1                    | 3.414  | -0.394 | 4.346  |           |        |        |        |
| 1                    | 5.331  | 1.053  | 3.688  |           |        |        |        |
| 1                    | 4.037  | 4.443  | -2.250 |           |        |        |        |
| Cefpodoxime proxetil |        |        |        | Auranofin |        |        |        |
| 16                   | -1.940 | -3.007 | 0.963  | 16        | 2.370  | -3.244 | -0.576 |
| 16                   | 3.819  | 1.587  | -1.379 | 8         | -0.038 | -2.187 | -0.805 |
| 8                    | -0.356 | -0.276 | -2.338 | 8         | -1.522 | 1.135  | -1.052 |
| 8                    | -2.542 | 1.611  | -0.325 | 8         | 1.112  | 1.730  | -0.169 |
| 8                    | -5.924 | -0.724 | 1.265  | 8         | 1.759  | -0.761 | 0.916  |
| 8                    | -3.281 | 1.083  | -2.401 | 8         | -2.661 | -1.623 | 0.387  |
| 8                    | 2.328  | -3.015 | -2.040 | 8         | -2.061 | 1.745  | 1.062  |
| 8                    | -1.427 | 3.469  | 0.285  | 8         | 2.664  | 2.221  | -1.736 |
| 8                    | 2.889  | -3.919 | 1.151  | 8         | 3.544  | 0.613  | 1.139  |
| 8                    | 0.450  | 3.375  | 1.346  | 8         | -4.392 | -0.214 | 0.002  |
| 8                    | 0.363  | 2.518  | -0.755 | 6         | -0.620 | 0.137  | -0.559 |
| 7                    | -2.116 | -1.492 | -1.306 | 6         | 0.801  | 0.536  | -0.888 |
| 7                    | 0.720  | -2.565 | -0.489 | 6         | -0.941 | -1.183 | -1.257 |
| 7                    | 3.486  | -2.662 | 1.045  | 6         | 1.769  | -0.581 | -0.509 |
| 7                    | 4.473  | -0.086 | 0.497  | 6         | 1.308  | -1.889 | -1.137 |
| 7                    | 5.631  | 1.965  | 0.636  | 6         | -2.353 | -1.657 | -1.012 |
| 6                    | -1.780 | -2.843 | -0.837 | 6         | -2.200 | 1.875  | -0.127 |

|                   |        |        |        |          |        |        |        |
|-------------------|--------|--------|--------|----------|--------|--------|--------|
| 6                 | -0.366 | -2.648 | -1.428 | 6        | 2.127  | 2.481  | -0.691 |
| 6                 | -0.852 | -1.251 | -1.851 | 6        | 2.705  | -0.098 | 1.632  |
| 6                 | -3.024 | -0.620 | -0.715 | 6        | -3.146 | 2.806  | -0.807 |
| 6                 | -3.770 | -0.986 | 0.343  | 6        | 2.459  | 3.613  | 0.221  |
| 6                 | -3.653 | -2.346 | 0.962  | 6        | -3.701 | -0.838 | 0.772  |
| 6                 | -4.708 | -0.042 | 1.019  | 6        | 2.528  | -0.383 | 3.088  |
| 6                 | -2.983 | 0.769  | -1.279 | 6        | -3.827 | -0.833 | 2.259  |
| 6                 | 2.013  | -2.602 | -0.943 | 1        | -0.750 | 0.030  | 0.521  |
| 6                 | 3.022  | -2.024 | 0.025  | 1        | 0.900  | 0.732  | -1.964 |
| 6                 | -2.274 | 2.978  | -0.726 | 1        | -0.822 | -1.047 | -2.349 |
| 6                 | -6.837 | 0.079  | 1.974  | 1        | 2.780  | -0.323 | -0.836 |
| 6                 | 3.494  | -0.681 | -0.271 | 1        | 1.405  | -1.786 | -2.230 |
| 6                 | -3.532 | 3.794  | -0.735 | 1        | -3.064 | -1.027 | -1.551 |
| 6                 | 3.016  | 0.066  | -1.317 | 1        | -2.453 | -2.692 | -1.345 |
| 6                 | 4.749  | 1.092  | 0.031  | 1        | 2.036  | -4.075 | -1.577 |
| 6                 | -0.131 | 3.058  | 0.198  | 1        | -4.064 | 2.250  | -1.018 |
| 6                 | 1.882  | 3.060  | 1.429  | 1        | -3.391 | 3.634  | -0.145 |
| 6                 | 3.477  | -4.614 | 2.239  | 1        | -2.747 | 3.171  | -1.752 |
| 6                 | 2.182  | 2.854  | 2.892  | 1        | 1.578  | 3.978  | 0.749  |
| 6                 | 2.668  | 4.185  | 0.799  | 1        | 2.935  | 4.415  | -0.339 |
| 1                 | -2.388 | -3.607 | -1.330 | 1        | 3.168  | 3.241  | 0.965  |
| 1                 | -0.082 | -3.325 | -2.235 | 1        | 1.608  | 0.091  | 3.438  |
| 1                 | -3.958 | -2.305 | 2.009  | 1        | 3.371  | 0.011  | 3.650  |
| 1                 | -4.309 | -3.080 | 0.483  | 1        | 2.422  | -1.454 | 3.261  |
| 1                 | 0.541  | -2.072 | 0.378  | 1        | -3.170 | -0.047 | 2.642  |
| 1                 | -4.889 | 0.860  | 0.414  | 1        | -4.849 | -0.593 | 2.544  |
| 1                 | -4.280 | 0.302  | 1.979  | 1        | -3.514 | -1.781 | 2.694  |
| 1                 | -1.757 | 2.940  | -1.689 |          |        |        |        |
| 1                 | -7.736 | -0.514 | 2.138  |          |        |        |        |
| 1                 | -7.104 | 0.982  | 1.407  |          |        |        |        |
| 1                 | -6.429 | 0.391  | 2.947  |          |        |        |        |
| 1                 | -4.002 | 3.776  | 0.250  |          |        |        |        |
| 1                 | -4.223 | 3.393  | -1.478 |          |        |        |        |
| 1                 | -3.303 | 4.829  | -0.994 |          |        |        |        |
| 1                 | 2.251  | -0.180 | -2.041 |          |        |        |        |
| 1                 | 2.033  | 2.133  | 0.867  |          |        |        |        |
| 1                 | 4.546  | -4.775 | 2.072  |          |        |        |        |
| 1                 | 3.334  | -4.069 | 3.177  |          |        |        |        |
| 1                 | 2.962  | -5.573 | 2.286  |          |        |        |        |
| 1                 | 6.248  | 1.485  | 1.278  |          |        |        |        |
| 1                 | 6.140  | 2.569  | 0.006  |          |        |        |        |
| 1                 | 1.567  | 2.059  | 3.316  |          |        |        |        |
| 1                 | 3.231  | 2.574  | 3.009  |          |        |        |        |
| 1                 | 2.005  | 3.770  | 3.463  |          |        |        |        |
| 1                 | 2.416  | 4.298  | -0.257 |          |        |        |        |
| 1                 | 3.737  | 3.971  | 0.875  |          |        |        |        |
| 1                 | 2.471  | 5.129  | 1.315  |          |        |        |        |
| cefuroxime axetil |        |        |        | Bosentan |        |        |        |
| 16                | -0.825 | -2.464 | -0.698 | 16       | 0.915  | 3.397  | 1.013  |
| 8                 | -0.439 | 1.265  | 1.512  | 8        | 0.307  | 4.546  | 0.365  |
| 8                 | 3.445  | 0.243  | 0.665  | 8        | 1.639  | 3.515  | 2.256  |
| 8                 | 3.606  | -1.683 | -1.613 | 8        | -2.431 | 0.880  | 0.038  |
| 8                 | 2.369  | 0.230  | 2.656  | 8        | -2.008 | -1.846 | -0.298 |
| 8                 | -4.578 | -0.637 | 2.002  | 8        | -4.322 | 1.441  | -1.661 |
| 8                 | 4.871  | 1.894  | 0.041  | 8        | -4.152 | -3.623 | -0.075 |
| 8                 | -5.777 | 2.295  | -1.257 | 7        | -0.447 | 2.347  | 1.240  |
| 8                 | -5.823 | -1.780 | -0.528 | 7        | 0.818  | 0.403  | 1.540  |
| 8                 | 5.752  | -1.348 | -0.923 | 7        | 0.080  | -1.692 | 0.676  |
| 8                 | 2.928  | 3.051  | -0.085 | 7        | 3.056  | -0.801 | 2.481  |
| 7                 | 0.238  | -1.014 | 1.328  | 7        | 2.607  | -2.645 | 1.026  |
| 7                 | -2.871 | -0.481 | 0.497  | 6        | 3.748  | -0.545 | -2.613 |
| 7                 | -5.918 | -0.432 | -0.849 | 6        | 3.162  | 0.572  | -1.754 |
| 7                 | 4.977  | -0.505 | -2.904 | 6        | 4.078  | -0.007 | -4.012 |
| 6                 | -0.834 | -1.959 | 1.050  | 6        | 2.700  | -1.664 | -2.726 |
| 6                 | -1.844 | -0.845 | 1.418  | 6        | 5.020  | -1.135 | -2.008 |
| 6                 | -0.622 | 0.084  | 1.468  | 6        | 2.006  | 1.240  | -2.188 |
| 6                 | 1.552  | -1.127 | 0.878  | 6        | 3.694  | 0.927  | -0.512 |
| 6                 | 1.901  | -2.096 | 0.004  | 6        | 1.901  | 2.468  | -0.138 |
| 6                 | 0.909  | -3.020 | -0.646 | 6        | 1.374  | 2.183  | -1.396 |
| 6                 | 3.322  | -2.366 | -0.376 | 6        | 3.062  | 1.856  | 0.307  |
| 6                 | 2.482  | -0.150 | 1.519  | 6        | -0.314 | 0.971  | 1.125  |
| 6                 | -4.175 | -0.338 | 0.899  | 6        | -1.334 | 0.228  | 0.528  |
| 6                 | -5.069 | 0.261  | -0.165 | 6        | -1.064 | -1.130 | 0.320  |
| 6                 | 4.379  | 1.221  | 1.182  | 6        | 0.970  | -0.889 | 1.273  |
| 6                 | -4.952 | 1.679  | -0.365 | 6        | -3.689 | 0.389  | 0.331  |
| 6                 | 4.862  | -1.182 | -1.725 | 6        | 2.290  | -1.488 | 1.623  |
| 6                 | 5.522  | 0.547  | 1.877  | 6        | -1.785 | -3.262 | -0.456 |
| 6                 | -4.104 | 2.599  | 0.200  | 6        | -4.703 | 0.710  | -0.586 |
| 6                 | -4.431 | 3.851  | -0.380 | 6        | -3.971 | -0.349 | 1.468  |
| 6                 | -5.447 | 3.609  | -1.251 | 6        | -5.997 | 0.259  | -0.337 |
| 6                 | 4.027  | 2.822  | -0.510 | 6        | -3.088 | -3.806 | -0.982 |
| 6                 | 4.693  | 3.497  | -1.666 | 6        | -5.269 | -0.796 | 1.707  |
| 6                 | -6.809 | -2.498 | -1.255 | 6        | -6.277 | -0.493 | 0.803  |
| 1                 | -0.807 | -2.839 | 1.699  | 6        | 4.242  | -1.334 | 2.762  |



|    |                        |        |        |  |  |
|----|------------------------|--------|--------|--|--|
| 1  | -5.722                 | 1.431  | 1.744  |  |  |
| 1  | -6.297                 | 0.533  | 3.142  |  |  |
| 1  | -4.615                 | 0.361  | 2.621  |  |  |
| 1  | -5.739                 | 0.887  | -2.986 |  |  |
| 1  | -9.539                 | -2.961 | 0.023  |  |  |
| 1  | -9.838                 | -1.208 | -0.086 |  |  |
| 1  | -9.614                 | -1.970 | 1.504  |  |  |
| 1  | -3.034                 | 2.116  | -0.981 |  |  |
| 1  | -0.630                 | 2.481  | -0.418 |  |  |
| 1  | -7.415                 | 4.049  | 0.661  |  |  |
| 1  | -9.013                 | 4.155  | 1.269  |  |  |
| 1  | -2.518                 | -2.659 | -2.609 |  |  |
| 1  | -3.454                 | -2.612 | -1.121 |  |  |
| 1  | -1.790                 | -3.245 | -1.118 |  |  |
| 1  | 3.785                  | -1.586 | -0.233 |  |  |
| 1  | 2.640                  | 1.832  | 0.162  |  |  |
| 1  | 6.525                  | 1.766  | 0.649  |  |  |
| 1  | 5.343                  | -2.362 | 0.536  |  |  |
| 1  | 8.760                  | 2.335  | 1.305  |  |  |
| 1  | 9.887                  | 1.100  | 1.843  |  |  |
| 1  | 7.660                  | -3.030 | 0.910  |  |  |
| 1  | 9.362                  | 1.892  | -1.095 |  |  |
| 1  | 9.787                  | -2.313 | 1.221  |  |  |
| 1  | 12.645                 | -0.218 | 0.185  |  |  |
| 1  | 13.065                 | 1.423  | 0.634  |  |  |
| 1  | 11.773                 | 0.572  | 1.496  |  |  |
| 1  | 12.675                 | 2.170  | -1.835 |  |  |
| 1  | 12.242                 | 0.528  | -2.267 |  |  |
| 1  | 11.099                 | 1.845  | -2.574 |  |  |
|    | adefovir dipivoxil     |        |        |  |  |
| 15 | 0.059                  | 2.263  | -0.607 |  |  |
| 8  | 0.118                  | 0.530  | 1.351  |  |  |
| 8  | -3.576                 | 1.356  | -0.742 |  |  |
| 8  | 3.138                  | 0.523  | -1.168 |  |  |
| 8  | -1.373                 | 1.726  | -1.149 |  |  |
| 8  | 0.898                  | 1.070  | -1.309 |  |  |
| 8  | -2.958                 | 0.859  | 1.371  |  |  |
| 8  | 2.963                  | 2.016  | 0.502  |  |  |
| 8  | 0.411                  | 3.650  | -0.963 |  |  |
| 7  | -0.114                 | -2.071 | 1.388  |  |  |
| 7  | 1.749                  | -2.844 | 0.374  |  |  |
| 7  | -1.402                 | -1.445 | -0.588 |  |  |
| 7  | -0.176                 | -1.849 | -2.628 |  |  |
| 7  | 1.935                  | -2.816 | -2.686 |  |  |
| 6  | -4.773                 | -0.394 | 0.342  |  |  |
| 6  | 4.499                  | 0.175  | 0.790  |  |  |
| 6  | -4.906                 | -1.015 | -1.048 |  |  |
| 6  | -4.521                 | -1.487 | 1.375  |  |  |
| 6  | -6.057                 | 0.376  | 0.697  |  |  |
| 6  | 5.746                  | 1.061  | 0.923  |  |  |
| 6  | 3.934                  | -0.128 | 2.182  |  |  |
| 6  | 4.848                  | -1.125 | 0.071  |  |  |
| 6  | -3.646                 | 0.626  | 0.408  |  |  |
| 6  | 3.457                  | 1.006  | 0.060  |  |  |
| 6  | -0.852                 | -1.338 | 2.402  |  |  |
| 6  | -0.232                 | 0.036  | 2.626  |  |  |
| 6  | 0.058                  | 1.922  | 1.184  |  |  |
| 6  | -0.328                 | -1.940 | 0.032  |  |  |
| 6  | -2.579                 | 2.351  | -0.789 |  |  |
| 6  | 2.165                  | 1.288  | -1.869 |  |  |
| 6  | 0.830                  | -2.430 | -0.568 |  |  |
| 6  | 1.152                  | -2.595 | 1.513  |  |  |
| 6  | 0.873                  | -2.361 | -1.968 |  |  |
| 6  | -1.226                 | -1.435 | -1.910 |  |  |
| 1  | -5.735                 | -1.728 | -1.047 |  |  |
| 1  | -5.106                 | -0.265 | -1.814 |  |  |
| 1  | -3.997                 | -1.555 | -1.319 |  |  |
| 1  | -5.377                 | -2.166 | 1.412  |  |  |
| 1  | -3.639                 | -2.073 | 1.103  |  |  |
| 1  | -4.371                 | -1.072 | 2.374  |  |  |
| 1  | -6.261                 | 1.168  | -0.028 |  |  |
| 1  | -5.991                 | 0.826  | 1.691  |  |  |
| 1  | -6.907                 | -0.311 | 0.694  |  |  |
| 1  | 6.511                  | 0.536  | 1.501  |  |  |
| 1  | 5.511                  | 1.999  | 1.431  |  |  |
| 1  | 6.173                  | 1.299  | -0.056 |  |  |
| 1  | 4.677                  | -0.667 | 2.776  |  |  |
| 1  | 3.671                  | 0.793  | 2.708  |  |  |
| 1  | 3.039                  | -0.752 | 2.110  |  |  |
| 1  | 5.625                  | -1.651 | 0.634  |  |  |
| 1  | 3.983                  | -1.788 | -0.002 |  |  |
| 1  | 5.234                  | -0.939 | -0.935 |  |  |
| 1  | -1.870                 | -1.217 | 2.033  |  |  |
| 1  | -0.878                 | -1.915 | 3.331  |  |  |
|    | estramustine phosphate |        |        |  |  |
| 17 | 7.504                  | -3.652 | -0.299 |  |  |
| 17 | 8.617                  | 3.240  | 1.035  |  |  |
| 15 | -8.074                 | -0.281 | 0.750  |  |  |
| 8  | -6.732                 | 0.566  | 0.645  |  |  |
| 8  | -7.532                 | -1.650 | 1.401  |  |  |
| 8  | -8.800                 | 0.420  | 1.998  |  |  |
| 8  | -8.887                 | -0.433 | -0.469 |  |  |
| 8  | 4.110                  | -0.688 | 0.180  |  |  |
| 8  | 4.429                  | 1.549  | -0.194 |  |  |
| 7  | 6.189                  | 0.138  | 0.160  |  |  |
| 6  | -4.339                 | 0.366  | 0.111  |  |  |
| 6  | -3.624                 | 0.298  | -1.250 |  |  |
| 6  | -2.120                 | 0.453  | -1.126 |  |  |
| 6  | -1.582                 | -0.673 | -0.222 |  |  |
| 6  | -5.774                 | 0.216  | -0.386 |  |  |
| 6  | -3.826                 | -0.763 | 0.996  |  |  |
| 6  | -4.425                 | 1.251  | -2.143 |  |  |
| 6  | -2.303                 | -0.715 | 1.133  |  |  |
| 6  | -5.872                 | 1.135  | -1.611 |  |  |
| 6  | -1.391                 | 0.419  | -2.461 |  |  |
| 6  | -4.176                 | 1.720  | 0.807  |  |  |
| 6  | -0.068                 | -0.626 | -0.115 |  |  |
| 6  | 0.082                  | 0.736  | -2.266 |  |  |
| 6  | 0.707                  | 0.014  | -1.099 |  |  |
| 6  | 0.599                  | -1.251 | 0.945  |  |  |
| 6  | 2.100                  | 0.016  | -0.997 |  |  |
| 6  | 1.981                  | -1.243 | 1.052  |  |  |
| 6  | 2.723                  | -0.600 | 0.074  |  |  |
| 6  | 4.862                  | 0.444  | 0.026  |  |  |
| 6  | 6.676                  | -1.191 | 0.501  |  |  |
| 6  | 7.147                  | 1.217  | -0.028 |  |  |
| 6  | 6.827                  | -2.052 | -0.738 |  |  |
| 6  | 7.363                  | 1.981  | 1.264  |  |  |
| 1  | -3.800                 | -0.724 | -1.631 |  |  |
| 1  | -1.898                 | 1.421  | -0.646 |  |  |
| 1  | -1.840                 | -1.614 | -0.743 |  |  |
| 1  | -5.941                 | -0.832 | -0.671 |  |  |
| 1  | -4.119                 | -1.723 | 0.547  |  |  |
| 1  | -4.297                 | -0.731 | 1.985  |  |  |
| 1  | -4.051                 | 2.276  | -2.046 |  |  |
| 1  | -4.347                 | 0.991  | -3.201 |  |  |
| 1  | -1.999                 | 0.156  | 1.728  |  |  |
| 1  | -1.979                 | -1.589 | 1.704  |  |  |
| 1  | -6.267                 | 2.103  | -1.294 |  |  |
| 1  | -6.573                 | 0.740  | -2.348 |  |  |
| 1  | -1.514                 | -0.579 | -2.907 |  |  |
| 1  | -1.836                 | 1.128  | -3.166 |  |  |
| 1  | -4.491                 | 2.554  | 0.175  |  |  |
| 1  | -4.789                 | 1.748  | 1.711  |  |  |
| 1  | -3.142                 | 1.906  | 1.100  |  |  |
| 1  | 0.653                  | 0.523  | -3.176 |  |  |
| 1  | 0.197                  | 1.816  | -2.100 |  |  |
| 1  | 0.028                  | -1.760 | 1.714  |  |  |
| 1  | 2.693                  | 0.517  | -1.753 |  |  |

|    |               |        |        |    |           |        |        |
|----|---------------|--------|--------|----|-----------|--------|--------|
| 1  | 0.666         | -0.023 | 3.263  | 1  | 2.487     | -1.730 | 1.879  |
| 1  | -0.964        | 0.688  | 3.120  | 1  | -8.150    | -2.373 | 1.257  |
| 1  | 0.913         | 2.444  | 1.631  | 1  | -9.422    | 1.093  | 1.705  |
| 1  | -0.872        | 2.335  | 1.604  | 1  | 5.996     | -1.670 | 1.207  |
| 1  | -2.889        | 3.045  | -1.572 | 1  | 7.643     | -1.084 | 1.001  |
| 1  | -2.503        | 2.863  | 0.179  | 1  | 6.778     | 1.895  | -0.801 |
| 1  | 2.425         | 2.351  | -1.856 | 1  | 8.091     | 0.789  | -0.378 |
| 1  | 2.164         | 0.882  | -2.881 | 1  | 5.862     | -2.226 | -1.215 |
| 1  | 1.575         | -2.786 | 2.491  | 1  | 7.508     | -1.600 | -1.462 |
| 1  | -2.048        | -1.018 | -2.491 | 1  | 6.446     | 2.484  | 1.575  |
| 1  | 1.983         | -2.525 | -3.650 | 1  | 7.706     | 1.328  | 2.068  |
| 1  | 2.808         | -2.946 | -2.200 |    |           |        |        |
|    | Bacampicillin |        |        |    | Dasatinib |        |        |
| 16 | 1.388         | -1.170 | 1.013  | 17 | -6.746    | 2.424  | 0.628  |
| 8  | 0.261         | 1.283  | -2.018 | 16 | -1.993    | -1.401 | 0.963  |
| 8  | -3.334        | -0.826 | 0.390  | 8  | 11.746    | -0.741 | -0.164 |
| 8  | -2.575        | -2.169 | -1.266 | 8  | -4.982    | -1.896 | 0.873  |
| 8  | 4.539         | -0.899 | -2.720 | 7  | 8.042     | -0.609 | 0.189  |
| 8  | -5.520        | -0.256 | 0.604  | 7  | 5.285     | 0.119  | 0.062  |
| 8  | -6.377        | 1.702  | 0.323  | 7  | 3.717     | 1.803  | -0.194 |
| 8  | -5.075        | 0.854  | -1.332 | 7  | 1.362     | 1.400  | -0.115 |
| 7  | -0.066        | -0.887 | -1.131 | 7  | 0.546     | -0.743 | 0.332  |
| 7  | 3.087         | 0.083  | -1.274 | 7  | -1.238    | 0.300  | -0.856 |
| 7  | 6.691         | -0.056 | -1.342 | 7  | -5.499    | -0.057 | -0.402 |
| 6  | 1.181         | -1.559 | -0.761 | 6  | 7.016     | -1.597 | -0.106 |
| 6  | -0.460        | -1.285 | 1.240  | 6  | 7.627     | 0.672  | -0.374 |
| 6  | -1.049        | -0.689 | -0.088 | 6  | 5.683     | -1.206 | 0.503  |
| 6  | 1.934         | -0.612 | -1.731 | 6  | 6.321     | 1.132  | 0.234  |
| 6  | 0.612         | 0.170  | -1.742 | 6  | 9.340     | -1.035 | -0.312 |
| 6  | -0.865        | -0.462 | 2.451  | 6  | 3.965     | 0.498  | 0.044  |
| 6  | -0.847        | -2.751 | 1.425  | 6  | 10.497    | -0.265 | 0.303  |
| 6  | -2.384        | -1.324 | -0.433 | 6  | 2.909     | -0.406 | 0.228  |
| 6  | 4.329         | -0.138 | -1.793 | 6  | 1.623     | 0.119  | 0.126  |
| 6  | 5.461         | 0.697  | -1.168 | 6  | 2.442     | 2.177  | -0.265 |
| 6  | -4.679        | -1.303 | 0.172  | 6  | 2.170     | 3.622  | -0.535 |
| 6  | 5.209         | 1.044  | 0.282  | 6  | -0.781    | -0.515 | 0.057  |
| 6  | -4.953        | -2.513 | 1.013  | 6  | -3.207    | -0.598 | 0.016  |
| 6  | 4.625         | 2.264  | 0.628  | 6  | -6.897    | -0.142 | -0.266 |
| 6  | 5.490         | 0.119  | 1.290  | 6  | -2.593    | 0.256  | -0.866 |
| 6  | 4.315         | 2.554  | 1.954  | 6  | -7.601    | -1.298 | -0.648 |
| 6  | 5.183         | 0.408  | 2.614  | 6  | -4.618    | -0.931 | 0.223  |
| 6  | -5.603        | 0.790  | -0.254 | 6  | -7.615    | 0.967  | 0.202  |
| 6  | 4.593         | 1.624  | 2.950  | 6  | -8.988    | -1.308 | -0.493 |
| 6  | -6.562        | 2.918  | -0.444 | 6  | -6.904    | -2.477 | -1.248 |
| 6  | -5.389        | 3.850  | -0.285 | 6  | -8.994    | 0.950  | 0.332  |
| 1  | 1.212         | -2.634 | -0.955 | 6  | -9.681    | -0.208 | -0.007 |
| 1  | -1.205        | 0.390  | 0.035  | 1  | 7.327     | -2.562 | 0.304  |
| 1  | 2.176         | -1.093 | -2.682 | 1  | 6.889     | -1.727 | -1.199 |
| 1  | -1.952        | -0.489 | 2.572  | 1  | 7.520     | 0.598  | -1.475 |
| 1  | -0.556        | 0.581  | 2.348  | 1  | 8.392     | 1.425  | -0.171 |
| 1  | -0.418        | -0.865 | 3.363  | 1  | 5.750     | -1.243 | 1.602  |
| 1  | -1.923        | -2.845 | 1.608  | 1  | 4.937     | -1.936 | 0.189  |
| 1  | -0.325        | -3.173 | 2.285  | 1  | 6.468     | 1.332  | 1.307  |
| 1  | -0.605        | -3.355 | 0.548  | 1  | 5.976     | 2.053  | -0.231 |
| 1  | 2.999         | 0.660  | -0.447 | 1  | 9.391     | -0.961 | -1.420 |
| 1  | 5.436         | 1.642  | -1.745 | 1  | 9.472     | -2.095 | -0.071 |
| 1  | -4.799        | -1.476 | -0.900 | 1  | 10.395    | 0.815  | 0.123  |
| 1  | 6.654         | -0.521 | -2.246 | 1  | 10.500    | -0.409 | 1.386  |
| 1  | 7.489         | 0.567  | -1.342 | 1  | 3.058     | -1.457 | 0.437  |
| 1  | -4.307        | -3.332 | 0.693  | 1  | 11.799    | -0.562 | -1.107 |
| 1  | -4.769        | -2.294 | 2.067  | 1  | 0.770     | -1.630 | 0.756  |
| 1  | -5.992        | -2.825 | 0.896  | 1  | 3.096     | 4.193  | -0.577 |
| 1  | 4.411         | 2.993  | -0.152 | 1  | 1.517     | 4.035  | 0.236  |
| 1  | 5.959         | -0.820 | 1.015  | 1  | 1.637     | 3.730  | -1.483 |
| 1  | 3.865         | 3.508  | 2.208  | 1  | -3.125    | 0.858  | -1.597 |
| 1  | 5.405         | -0.319 | 3.389  | 1  | -5.144    | 0.876  | -0.565 |
| 1  | 4.356         | 1.848  | 3.985  | 1  | -9.533    | -2.201 | -0.787 |
| 1  | -7.482        | 3.341  | -0.040 | 1  | -7.590    | -3.046 | -1.878 |
| 1  | -6.724        | 2.646  | -1.490 | 1  | -6.511    | -3.140 | -0.475 |
| 1  | -5.583        | 4.782  | -0.819 | 1  | -6.051    | -2.168 | -1.858 |
| 1  | -5.219        | 4.092  | 0.766  | 1  | -9.509    | 1.828  | 0.700  |
| 1  | -4.480        | 3.410  | -0.698 | 1  | -10.760   | -0.242 | 0.096  |
|    | Cefdinir      |        |        |    | Erlotinib |        |        |
| 16 | 1.883         | -1.785 | 0.390  | 8  | 2.500     | 1.262  | -0.103 |
| 16 | -6.190        | 1.223  | 0.656  | 8  | 3.573     | -1.041 | 0.186  |
| 8  | 1.541         | 2.244  | -1.135 | 8  | 3.655     | 3.698  | 0.935  |
| 8  | 5.489         | 1.621  | -1.462 | 8  | 6.086     | -1.759 | -1.032 |
| 8  | 4.404         | 2.888  | 0.048  | 7  | -2.659    | 0.409  | -0.119 |
| 8  | -1.887        | 0.238  | 1.826  | 7  | -0.710    | -3.200 | 0.418  |
| 8  | -1.368        | -2.185 | -1.038 | 7  | -2.710    | -1.898 | 0.213  |
| 7  | 2.636         | 0.798  | 0.404  | 6  | -0.574    | -0.788 | 0.101  |
| 7  | -0.546        | 0.141  | -0.003 | 6  | 0.024     | -2.060 | 0.275  |
| 7  | -2.692        | -1.729 | -0.952 | 6  | 1.625     | 0.240  | 0.008  |
| 7  | -5.183        | -0.672 | -0.801 | 6  | 2.227     | -1.048 | 0.172  |



|             |        |        |        |           |        |        |        |
|-------------|--------|--------|--------|-----------|--------|--------|--------|
| 7           | -7.461 | -0.270 | -1.248 | 6         | 0.253  | 0.353  | -0.028 |
| 6           | 1.771  | -0.126 | 1.119  | 6         | -2.006 | -0.785 | 0.069  |
| 6           | 0.563  | 0.738  | 0.662  | 6         | 1.433  | -2.162 | 0.305  |
| 6           | 1.579  | 1.472  | -0.222 | 6         | 1.969  | 2.564  | -0.283 |
| 6           | 3.946  | 0.558  | 0.001  | 6         | -4.020 | 0.729  | -0.193 |
| 6           | 3.690  | -1.863 | 0.608  | 6         | 4.229  | -2.294 | 0.340  |
| 6           | 4.498  | -0.683 | 0.127  | 6         | -2.011 | -3.037 | 0.381  |
| 6           | 4.625  | 1.810  | -0.442 | 6         | 3.114  | 3.533  | -0.353 |
| 6           | -1.717 | -0.088 | 0.663  | 6         | 5.710  | -2.057 | 0.290  |
| 6           | 5.913  | -0.924 | -0.093 | 6         | -5.061 | -0.186 | -0.021 |
| 6           | -2.820 | -0.720 | -0.155 | 6         | -4.326 | 2.074  | -0.452 |
| 6           | 6.541  | -2.100 | 0.054  | 6         | -6.391 | 0.249  | -0.111 |
| 6           | -4.167 | -0.169 | -0.017 | 6         | -5.643 | 2.496  | -0.539 |
| 6           | -4.518 | 0.847  | 0.832  | 6         | -6.684 | 1.594  | -0.371 |
| 6           | -6.292 | -0.048 | -0.560 | 6         | 4.793  | 4.522  | 0.926  |
| 1           | 1.974  | -0.165 | 2.193  | 6         | 7.453  | -1.450 | -1.133 |
| 1           | 0.183  | 1.348  | 1.485  | 6         | -7.446 | -0.688 | 0.065  |
| 1           | -0.403 | -0.306 | -0.899 | 6         | -8.348 | -1.476 | 0.213  |
| 1           | 3.993  | -2.750 | 0.047  | 1         | -0.176 | 1.340  | -0.146 |
| 1           | 3.918  | -2.075 | 1.660  | 1         | 1.853  | -3.151 | 0.436  |
| 1           | 6.507  | -0.065 | -0.384 | 1         | -2.056 | 1.203  | -0.257 |
| 1           | 7.608  | -2.177 | -0.112 | 1         | 1.308  | 2.826  | 0.555  |
| 1           | 6.037  | -3.016 | 0.341  | 1         | 1.382  | 2.605  | -1.212 |
| 1           | 5.850  | 2.495  | -1.670 | 1         | 3.949  | -2.747 | 1.301  |
| 1           | -3.907 | 1.352  | 1.562  | 1         | 3.927  | -2.978 | -0.464 |
| 1           | -1.455 | -2.937 | -1.634 | 1         | -2.618 | -3.933 | 0.499  |
| 1           | -7.451 | -1.147 | -1.751 | 1         | 3.877  | 3.158  | -1.053 |
| 1           | -8.317 | -0.122 | -0.734 | 1         | 2.748  | 4.497  | -0.748 |
|             |        |        |        | 1         | 5.980  | -1.231 | 0.968  |
|             |        |        |        | 1         | 6.231  | -2.961 | 0.649  |
|             |        |        |        | 1         | -4.836 | -1.223 | 0.176  |
|             |        |        |        | 1         | -3.517 | 2.789  | -0.586 |
|             |        |        |        | 1         | -5.857 | 3.540  | -0.741 |
|             |        |        |        | 1         | -7.717 | 1.915  | -0.438 |
|             |        |        |        | 1         | 5.148  | 4.600  | 1.954  |
|             |        |        |        | 1         | 4.562  | 5.532  | 0.553  |
|             |        |        |        | 1         | 5.593  | 4.099  | 0.303  |
|             |        |        |        | 1         | 7.714  | -0.570 | -0.528 |
|             |        |        |        | 1         | 8.085  | -2.291 | -0.809 |
|             |        |        |        | 1         | 7.664  | -1.235 | -2.180 |
|             |        |        |        | 1         | -9.138 | -2.174 | 0.343  |
| Delavirdine |        |        |        | Darunavir |        |        |        |
| 16          | 7.301  | -1.449 | 0.294  | 16        | 4.040  | 0.026  | -1.027 |
| 8           | -0.182 | 3.604  | -1.739 | 8         | -5.249 | -2.037 | 2.055  |
| 8           | 8.670  | -1.333 | -0.168 | 8         | -5.080 | -0.420 | 3.704  |
| 8           | 6.968  | -2.007 | 1.588  | 8         | -3.318 | -0.535 | 0.385  |
| 7           | -3.787 | 0.756  | 0.090  | 8         | 0.638  | -2.691 | -1.523 |
| 7           | -1.329 | 1.924  | -0.695 | 8         | -3.206 | -1.300 | -1.753 |
| 7           | 1.271  | 1.233  | 0.469  | 8         | 3.267  | 0.604  | -2.118 |
| 7           | -4.840 | -1.708 | -0.525 | 8         | 5.356  | -0.556 | -1.220 |
| 7           | -5.363 | 1.039  | 1.824  | 7         | -1.311 | -0.762 | -0.563 |
| 7           | 6.691  | 0.127  | 0.239  | 7         | 3.069  | -1.190 | -0.397 |
| 6           | -3.604 | 2.206  | 0.118  | 7         | 4.333  | 4.056  | 3.341  |
| 6           | -2.514 | 0.079  | 0.367  | 6         | -5.349 | 0.257  | 1.437  |
| 6           | -2.591 | 2.617  | -0.932 | 6         | -5.726 | -0.781 | 2.528  |
| 6           | -1.491 | 0.471  | -0.677 | 6         | -4.758 | -0.587 | 0.303  |
| 6           | -4.869 | 0.270  | 0.866  | 6         | -4.396 | 1.197  | 2.178  |
| 6           | -0.170 | 2.548  | -1.127 | 6         | -5.257 | -1.980 | 0.641  |
| 6           | 1.106  | 1.924  | -0.722 | 6         | -3.921 | 0.332  | 3.335  |
| 6           | -5.397 | -1.006 | 0.531  | 6         | -0.453 | -0.544 | -1.734 |
| 6           | 2.312  | 1.978  | -1.376 | 6         | 0.866  | -1.291 | -1.551 |
| 6           | 3.268  | 1.308  | -0.564 | 6         | -2.669 | -0.896 | -0.750 |
| 6           | 2.590  | 0.874  | 0.605  | 6         | 1.647  | -0.850 | -0.309 |
| 6           | -5.559 | -2.802 | -1.179 | 6         | -0.287 | 0.950  | -2.052 |
| 6           | -6.446 | -1.475 | 1.321  | 6         | 3.626  | -2.006 | 0.685  |
| 6           | 4.634  | 1.020  | -0.700 | 6         | 3.224  | -3.474 | 0.559  |
| 6           | 3.248  | 0.209  | 1.638  | 6         | -1.613 | 1.612  | -2.301 |
| 6           | -6.392 | 0.579  | 2.548  | 6         | 4.169  | 1.268  | 0.235  |
| 6           | 5.291  | 0.369  | 0.334  | 6         | 3.740  | -4.068 | -0.743 |
| 6           | -6.941 | -0.677 | 2.348  | 6         | 3.731  | -4.240 | 1.773  |
| 6           | 4.604  | -0.027 | 1.501  | 6         | -2.241 | 1.504  | -3.544 |
| 6           | -6.835 | -2.338 | -1.874 | 6         | -2.291 | 2.264  | -1.269 |
| 6           | -4.610 | -3.483 | -2.148 | 6         | 5.111  | 1.121  | 1.255  |
| 6           | 6.351  | -2.352 | -0.927 | 6         | 3.299  | 2.357  | 0.239  |
| 1           | -3.276 | 2.545  | 1.113  | 6         | -3.513 | 2.025  | -3.746 |
| 1           | -4.568 | 2.681  | -0.075 | 6         | -3.567 | 2.783  | -1.465 |
| 1           | -2.672 | -1.002 | 0.354  | 6         | -4.183 | 2.661  | -2.705 |
| 1           | -2.147 | 0.354  | 1.373  | 6         | 5.176  | 2.055  | 2.274  |
| 1           | -2.967 | 2.380  | -1.938 | 6         | 3.366  | 3.293  | 1.258  |
| 1           | -2.399 | 3.689  | -0.900 | 6         | 4.303  | 3.154  | 2.293  |
| 1           | -0.534 | -0.013 | -0.489 | 1         | -6.231 | 0.780  | 1.063  |
| 1           | -1.843 | 0.136  | -1.667 | 1         | -6.797 | -0.858 | 2.753  |
| 1           | 2.467  | 2.449  | -2.335 | 1         | -5.051 | -0.256 | -0.695 |
| 1           | 0.584  | 1.219  | 1.207  | 1         | -4.947 | 2.061  | 2.560  |

|            |        |        |        |           |        |        |        |
|------------|--------|--------|--------|-----------|--------|--------|--------|
| 1          | -4.385 | -1.076 | -1.179 | 1         | -3.582 | 1.558  | 1.548  |
| 1          | -5.821 | -3.522 | -0.392 | 1         | -4.622 | -2.776 | 0.252  |
| 1          | -6.891 | -2.444 | 1.121  | 1         | -6.274 | -2.120 | 0.239  |
| 1          | 5.176  | 1.318  | -1.593 | 1         | -3.599 | 0.887  | 4.218  |
| 1          | 2.724  | -0.101 | 2.535  | 1         | -3.115 | -0.345 | 3.023  |
| 1          | -6.776 | 1.245  | 3.315  | 1         | -0.981 | -1.024 | -2.564 |
| 1          | -7.761 | -1.024 | 2.967  | 1         | 1.492  | -1.103 | -2.427 |
| 1          | 5.159  | -0.520 | 2.289  | 1         | 1.238  | -1.361 | 0.570  |
| 1          | -6.595 | -1.658 | -2.697 | 1         | 1.526  | 0.228  | -0.127 |
| 1          | -7.387 | -3.184 | -2.292 | 1         | -1.080 | -0.213 | 0.258  |
| 1          | -7.500 | -1.809 | -1.188 | 1         | 0.227  | 1.450  | -1.222 |
| 1          | -5.095 | -4.327 | -2.643 | 1         | 0.375  | 1.044  | -2.919 |
| 1          | -4.293 | -2.786 | -2.932 | 1         | 3.319  | -1.602 | 1.665  |
| 1          | -3.716 | -3.848 | -1.640 | 1         | 4.716  | -1.933 | 0.627  |
| 1          | 7.139  | 0.623  | -0.524 | 1         | 2.126  | -3.523 | 0.546  |
| 1          | 6.687  | -3.388 | -0.891 | 1         | -0.111 | -2.834 | -0.930 |
| 1          | 5.296  | -2.290 | -0.662 | 1         | 3.354  | -3.522 | -1.605 |
| 1          | 6.536  | -1.927 | -1.912 | 1         | 3.438  | -5.113 | -0.844 |
|            |        |        |        | 1         | 4.834  | -4.028 | -0.780 |
|            |        |        |        | 1         | 3.434  | -5.291 | 1.730  |
|            |        |        |        | 1         | 4.825  | -4.214 | 1.824  |
|            |        |        |        | 1         | 3.347  | -3.825 | 2.711  |
|            |        |        |        | 1         | -1.731 | 0.991  | -4.355 |
|            |        |        |        | 1         | -1.811 | 2.361  | -0.297 |
|            |        |        |        | 1         | 5.806  | 0.289  | 1.228  |
|            |        |        |        | 1         | 2.600  | 2.482  | -0.582 |
|            |        |        |        | 1         | -3.987 | 1.928  | -4.718 |
|            |        |        |        | 1         | -4.079 | 3.285  | -0.648 |
|            |        |        |        | 1         | 5.915  | 1.946  | 3.062  |
|            |        |        |        | 1         | 2.698  | 4.149  | 1.253  |
|            |        |        |        | 1         | -5.178 | 3.066  | -2.863 |
|            |        |        |        | 1         | 3.944  | 4.967  | 3.152  |
|            |        |        |        | 1         | 5.198  | 4.107  | 3.857  |
| Amprenavir |        |        |        | Diltiazem |        |        |        |
| 16         | 3.565  | 0.017  | -1.222 | 16        | -0.534 | -0.496 | -2.114 |
| 8          | 0.404  | -2.990 | -0.719 | 8         | 0.851  | -2.175 | 1.269  |
| 8          | -3.408 | -0.897 | 1.453  | 8         | 0.102  | 0.396  | 1.733  |
| 8          | -6.207 | 0.652  | 1.319  | 8         | 5.774  | 0.766  | -0.731 |
| 8          | 2.606  | 0.298  | -2.281 | 8         | -0.786 | -2.445 | 2.795  |
| 8          | 4.911  | -0.456 | -1.488 | 7         | -1.863 | 0.127  | 0.619  |
| 8          | -3.436 | -2.145 | -0.446 | 7         | -2.209 | 3.852  | 0.780  |
| 7          | 2.833  | -1.148 | -0.260 | 6         | 0.565  | -1.449 | -0.966 |
| 7          | -1.538 | -1.043 | 0.244  | 6         | -0.118 | -1.591 | 0.399  |
| 7          | 3.809  | 4.822  | 2.281  | 6         | -0.594 | -0.260 | 0.979  |
| 6          | 0.497  | -1.603 | -1.003 | 6         | -2.331 | 1.415  | 1.134  |
| 6          | -0.898 | -0.983 | -1.075 | 6         | -2.665 | -0.570 | -0.319 |
| 6          | 1.413  | -0.908 | 0.008  | 6         | 1.921  | -0.797 | -0.929 |
| 6          | 3.625  | -1.726 | 0.829  | 6         | -2.164 | -0.956 | -1.577 |
| 6          | -0.914 | 0.441  | -1.649 | 6         | -1.899 | 2.550  | 0.214  |
| 6          | 3.361  | -3.222 | 0.991  | 6         | -3.991 | -0.864 | 0.008  |
| 6          | -4.801 | -1.237 | 1.663  | 6         | -3.006 | -1.625 | -2.471 |
| 6          | -2.304 | 1.002  | -1.757 | 6         | 2.096  | 0.568  | -0.720 |
| 6          | 4.124  | -3.739 | 2.203  | 6         | 3.061  | -1.594 | -1.076 |
| 6          | 3.730  | -3.978 | -0.276 | 6         | -4.819 | -1.510 | -0.898 |
| 6          | -5.190 | -0.610 | 2.988  | 6         | -4.329 | -1.890 | -2.144 |
| 6          | 3.678  | 1.485  | -0.229 | 6         | 3.366  | 1.131  | -0.645 |
| 6          | -5.705 | -0.517 | 0.666  | 6         | 4.332  | -1.052 | -1.006 |
| 6          | -2.858 | -1.421 | 0.332  | 6         | -1.277 | 4.207  | 1.837  |
| 6          | -5.528 | 0.806  | 2.557  | 6         | -2.219 | 4.880  | -0.243 |
| 6          | -3.139 | 0.652  | -2.820 | 6         | 4.491  | 0.318  | -0.786 |
| 6          | -2.812 | 1.845  | -0.765 | 6         | 0.380  | -2.519 | 2.495  |
| 6          | 4.713  | 1.621  | 0.698  | 6         | 1.499  | -2.959 | 3.380  |
| 6          | 2.701  | 2.475  | -0.334 | 6         | 5.971  | 2.145  | -0.497 |
| 6          | -4.439 | 1.137  | -2.894 | 1         | 0.679  | -2.459 | -1.374 |
| 6          | -4.114 | 2.332  | -0.833 | 1         | -0.970 | -2.273 | 0.315  |
| 6          | 4.766  | 2.735  | 1.515  | 1         | -3.419 | 1.393  | 1.220  |
| 6          | 2.756  | 3.591  | 0.483  | 1         | -1.914 | 1.536  | 2.134  |
| 6          | 3.786  | 3.737  | 1.423  | 1         | -2.427 | 2.450  | -0.742 |
| 6          | -4.931 | 1.980  | -1.901 | 1         | -0.820 | 2.439  | -0.012 |
| 1          | 0.962  | -1.527 | -1.990 | 1         | -4.361 | -0.590 | 0.990  |
| 1          | -1.504 | -1.634 | -1.715 | 1         | -2.607 | -1.922 | -3.435 |
| 1          | 1.195  | -1.294 | 1.010  | 1         | 1.228  | 1.211  | -0.612 |
| 1          | 1.214  | 0.173  | 0.045  | 1         | 2.945  | -2.662 | -1.240 |
| 1          | 3.424  | -1.193 | 1.773  | 1         | -5.845 | -1.731 | -0.623 |
| 1          | 4.681  | -1.577 | 0.584  | 1         | -4.970 | -2.400 | -2.854 |
| 1          | -0.305 | 1.098  | -1.017 | 1         | 3.465  | 2.196  | -0.477 |
| 1          | -0.418 | 0.419  | -2.625 | 1         | 5.216  | -1.669 | -1.121 |
| 1          | 2.285  | -3.357 | 1.167  | 1         | -1.271 | 3.450  | 2.623  |
| 1          | -1.299 | -0.293 | 0.883  | 1         | -1.575 | 5.157  | 2.287  |
| 1          | -4.901 | -2.323 | 1.618  | 1         | -0.240 | 4.311  | 1.465  |
| 1          | -6.081 | -1.110 | 3.378  | 1         | -2.498 | 5.839  | 0.200  |
| 1          | -4.395 | -0.681 | 3.731  | 1         | -1.236 | 5.009  | -0.734 |
| 1          | 3.848  | -3.207 | 3.119  | 1         | -2.953 | 4.635  | -1.014 |
| 1          | 3.932  | -4.802 | 2.367  | 1         | 1.108  | -3.516 | 4.228  |

|    |              |        |        |   |             |        |        |
|----|--------------|--------|--------|---|-------------|--------|--------|
| 1  | 5.204        | -3.621 | 2.065  | 1 | 2.231       | -3.552 | 2.832  |
| 1  | 3.161        | -3.614 | -1.133 | 1 | 2.013       | -2.068 | 3.750  |
| 1  | 3.529        | -5.047 | -0.168 | 1 | 7.048       | 2.300  | -0.480 |
| 1  | 4.796        | -3.858 | -0.504 | 1 | 5.532       | 2.756  | -1.295 |
| 1  | -0.236       | -3.081 | -0.002 | 1 | 5.545       | 2.455  | 0.464  |
| 1  | -5.159       | -0.245 | -0.243 |   |             |        |        |
| 1  | -6.555       | -1.144 | 0.377  |   |             |        |        |
| 1  | -4.609       | 1.402  | 2.427  |   |             |        |        |
| 1  | -6.191       | 1.340  | 3.241  |   |             |        |        |
| 1  | -2.764       | -0.012 | -3.595 |   |             |        |        |
| 1  | -2.175       | 2.126  | 0.072  |   |             |        |        |
| 1  | 5.487        | 0.862  | 0.753  |   |             |        |        |
| 1  | 1.925        | 2.375  | -1.085 |   |             |        |        |
| 1  | -5.073       | 0.854  | -3.729 |   |             |        |        |
| 1  | -4.496       | 2.976  | -0.048 |   |             |        |        |
| 1  | 5.577        | 2.846  | 2.229  |   |             |        |        |
| 1  | 2.002        | 4.368  | 0.392  |   |             |        |        |
| 1  | -5.949       | 2.350  | -1.951 |   |             |        |        |
| 1  | 3.311        | 5.642  | 1.970  |   |             |        |        |
| 1  | 4.706        | 5.048  | 2.685  |   |             |        |        |
|    | Colchicine   |        |        |   | Balsalazide |        |        |
| 8  | 0.973        | -1.779 | 1.295  | 8 | 4.988       | -1.999 | 0.786  |
| 8  | 3.686        | -1.652 | 1.008  | 8 | -7.445      | -0.628 | -0.813 |
| 8  | 4.787        | -0.381 | -1.236 | 8 | 7.312       | 1.574  | -2.207 |
| 8  | -5.062       | -1.970 | -0.069 | 8 | 5.847       | 2.395  | -0.716 |
| 8  | -5.016       | 0.721  | 0.573  | 8 | -5.668      | 2.750  | 0.912  |
| 8  | -0.885       | 2.854  | 2.046  | 8 | -7.607      | 1.838  | 0.241  |
| 7  | 0.422        | 2.249  | 0.297  | 7 | 4.910       | 0.252  | 1.045  |
| 6  | -0.693       | 2.121  | -0.637 | 7 | -1.271      | -1.265 | -0.160 |
| 6  | -0.211       | 2.278  | -2.086 | 7 | -1.995      | -0.279 | 0.157  |
| 6  | 0.326        | 0.988  | -2.719 | 6 | 6.351       | 0.360  | 1.155  |
| 6  | -1.513       | 0.842  | -0.429 | 6 | 2.856       | -0.962 | 0.581  |
| 6  | 1.222        | 0.234  | -1.780 | 6 | 7.048       | 0.367  | -0.196 |
| 6  | 0.641        | -0.435 | -0.687 | 6 | 4.333       | -0.964 | 0.803  |
| 6  | -0.831       | -0.418 | -0.482 | 6 | 2.288       | -2.110 | 0.024  |
| 6  | 1.484        | -1.085 | 0.226  | 6 | 2.024       | 0.116  | 0.917  |
| 6  | 2.605        | 0.257  | -1.924 | 6 | 0.100       | -1.092 | 0.119  |
| 6  | -2.845       | 1.053  | -0.180 | 6 | 0.925       | -2.173 | -0.211 |
| 6  | -1.446       | -1.649 | -0.368 | 6 | 0.661       | 0.058  | 0.692  |
| 6  | 2.876        | -1.058 | 0.079  | 6 | -3.361      | -0.447 | -0.120 |
| 6  | 3.440        | -0.381 | -1.009 | 6 | -5.567      | 0.591  | -0.002 |
| 6  | -3.984       | 0.210  | 0.122  | 6 | -4.188      | 0.621  | 0.218  |
| 6  | 0.224        | 2.606  | 1.601  | 6 | -6.121      | -0.567 | -0.587 |
| 6  | -2.796       | -2.008 | -0.248 | 6 | -3.929      | -1.593 | -0.701 |
| 6  | -3.934       | -1.243 | -0.114 | 6 | 6.653       | 1.550  | -1.030 |
| 6  | 1.481        | 2.697  | 2.432  | 6 | -5.285      | -1.643 | -0.927 |
| 6  | 0.618        | -0.949 | 2.397  | 6 | -6.411      | 1.745  | 0.373  |
| 6  | 3.721        | -3.075 | 0.919  | 1 | 6.581       | 1.274  | 1.708  |
| 6  | 5.573        | 0.287  | -0.253 | 1 | 6.703       | -0.491 | 1.740  |
| 6  | -6.346       | -1.403 | -0.361 | 1 | 6.814       | -0.549 | -0.750 |
| 1  | -1.356       | 2.957  | -0.401 | 1 | 8.137       | 0.369  | -0.083 |
| 1  | 0.558        | 3.058  | -2.101 | 1 | 4.424       | 1.092  | 0.767  |
| 1  | -1.044       | 2.652  | -2.690 | 1 | 2.942       | -2.941 | -0.213 |
| 1  | -0.522       | 0.352  | -2.998 | 1 | 2.440       | 1.002  | 1.389  |
| 1  | 0.856        | 1.227  | -3.645 | 1 | 0.467       | -3.054 | -0.649 |
| 1  | 1.347        | 1.984  | -0.006 | 1 | 0.010       | 0.883  | 0.957  |
| 1  | 3.063        | 0.764  | -2.769 | 1 | -3.739      | 1.499  | 0.666  |
| 1  | -3.139       | 2.097  | -0.088 | 1 | -3.284      | -2.423 | -0.964 |
| 1  | -0.773       | -2.499 | -0.437 | 1 | -5.734      | -2.526 | -1.376 |
| 1  | -2.999       | -3.076 | -0.280 | 1 | -7.648      | -1.482 | -1.212 |
| 1  | 2.337        | 2.185  | 1.986  | 1 | 7.000       | 2.354  | -2.686 |
| 1  | 1.288        | 2.280  | 3.421  | 1 | -6.297      | 3.452  | 1.124  |
| 1  | 1.743        | 3.749  | 2.572  |   |             |        |        |
| 1  | -0.131       | -0.200 | 2.109  |   |             |        |        |
| 1  | 1.504        | -0.445 | 2.802  |   |             |        |        |
| 1  | 0.193        | -1.603 | 3.158  |   |             |        |        |
| 1  | 4.385        | -3.418 | 1.713  |   |             |        |        |
| 1  | 2.725        | -3.502 | 1.067  |   |             |        |        |
| 1  | 4.122        | -3.390 | -0.050 |   |             |        |        |
| 1  | 6.609        | 0.198  | -0.577 |   |             |        |        |
| 1  | 5.304        | 1.350  | -0.205 |   |             |        |        |
| 1  | 5.455        | -0.166 | 0.734  |   |             |        |        |
| 1  | -6.761       | -0.892 | 0.505  |   |             |        |        |
| 1  | -6.291       | -0.703 | -1.196 |   |             |        |        |
| 1  | -6.962       | -2.258 | -0.640 |   |             |        |        |
|    | Bicalutamide |        |        |   | Cinoxacin   |        |        |
| 16 | -2.441       | -0.497 | -0.665 | 8 | 4.020       | 0.599  | -0.052 |
| 9  | -6.644       | 3.421  | 0.469  | 8 | 3.734       | -1.677 | 0.169  |
| 9  | 4.524        | 1.202  | 2.409  | 8 | -1.387      | -2.549 | 0.006  |
| 9  | 6.168        | 0.768  | 1.070  | 8 | -3.944      | -1.693 | 0.753  |
| 9  | 4.970        | 2.545  | 0.770  | 8 | -4.546      | -0.041 | -0.649 |
| 8  | -2.034       | -3.594 | 0.357  | 7 | -0.771      | 1.424  | -0.305 |
| 8  | -2.992       | -1.515 | -1.552 | 7 | -2.010      | 0.964  | -0.245 |
| 8  | -1.220       | 0.230  | -1.003 | 6 | 0.353       | 0.621  | -0.176 |

|    |             |        |        |    |                 |        |        |
|----|-------------|--------|--------|----|-----------------|--------|--------|
| 8  | 0.008       | -2.772 | -1.082 | 6  | 0.167           | -0.769 | -0.044 |
| 7  | 0.900       | -1.476 | 0.585  | 6  | 2.695           | 0.306  | -0.085 |
| 7  | 6.253       | 1.535  | -2.293 | 6  | 1.652           | 1.185  | -0.196 |
| 6  | -1.304      | -2.536 | 0.911  | 6  | 2.515           | -1.076 | 0.045  |
| 6  | -2.172      | -1.255 | 0.965  | 6  | 1.272           | -1.637 | 0.068  |
| 6  | -0.950      | -2.953 | 2.334  | 6  | -0.682          | 2.887  | -0.391 |
| 6  | -0.057      | -2.288 | 0.028  | 6  | -1.182          | -1.340 | -0.029 |
| 6  | -3.721      | 0.701  | -0.326 | 6  | -2.232          | -0.319 | -0.093 |
| 6  | 2.002       | -0.888 | -0.041 | 6  | 4.700           | -0.660 | -0.055 |
| 6  | -3.363      | 2.002  | 0.014  | 6  | -0.471          | 3.532  | 0.964  |
| 6  | -5.054      | 0.310  | -0.411 | 6  | -3.688          | -0.647 | -0.055 |
| 6  | 2.885       | -0.163 | 0.768  | 1  | 1.829           | 2.247  | -0.288 |
| 6  | -4.357      | 2.931  | 0.288  | 1  | 1.090           | -2.700 | 0.168  |
| 6  | -6.052      | 1.234  | -0.138 | 1  | 0.113           | 3.142  | -1.096 |
| 6  | 2.238       | -0.971 | -1.417 | 1  | -1.626          | 3.203  | -0.834 |
| 6  | 3.986       | 0.472  | 0.227  | 1  | 5.441           | -0.672 | 0.749  |
| 6  | -5.681      | 2.525  | 0.207  | 1  | 5.177           | -0.809 | -1.033 |
| 6  | 4.234       | 0.394  | -1.156 | 1  | -1.301          | 3.294  | 1.633  |
| 6  | 3.343       | -0.333 | -1.953 | 1  | 0.453           | 3.194  | 1.439  |
| 6  | 4.914       | 1.247  | 1.120  | 1  | -0.419          | 4.618  | 0.863  |
| 6  | 5.352       | 1.028  | -1.765 | 1  | -4.899          | -1.837 | 0.708  |
| 1  | -3.153      | -1.520 | 1.368  |    |                 |        |        |
| 1  | -1.728      | -0.468 | 1.582  |    |                 |        |        |
| 1  | -1.864      | -3.229 | 2.863  |    |                 |        |        |
| 1  | -0.467      | -2.156 | 2.906  |    |                 |        |        |
| 1  | -0.294      | -3.824 | 2.318  |    |                 |        |        |
| 1  | 0.756       | -1.203 | 1.546  |    |                 |        |        |
| 1  | -1.937      | -3.535 | -0.606 |    |                 |        |        |
| 1  | -2.315      | 2.282  | 0.042  |    |                 |        |        |
| 1  | -5.300      | -0.705 | -0.707 |    |                 |        |        |
| 1  | 2.708       | -0.094 | 1.836  |    |                 |        |        |
| 1  | -4.125      | 3.957  | 0.548  |    |                 |        |        |
| 1  | -7.102      | 0.975  | -0.200 |    |                 |        |        |
| 1  | 1.558       | -1.522 | -2.048 |    |                 |        |        |
| 1  | 3.527       | -0.391 | -3.020 |    |                 |        |        |
|    | Cyclacillin |        |        |    | Chloramphenicol |        |        |
| 16 | 1.199       | 1.447  | 0.224  | 17 | 4.592           | 1.525  | -0.190 |
| 8  | 1.332       | -2.528 | 1.081  | 17 | 5.582           | -1.239 | -0.473 |
| 8  | 5.600       | -0.443 | 0.407  | 8  | -0.096          | -1.413 | 1.812  |
| 8  | -2.626      | -1.058 | -1.386 | 8  | 0.569           | 2.384  | 0.155  |
| 8  | 4.706       | -1.113 | -1.550 | 8  | 2.738           | -1.404 | -1.137 |
| 7  | 2.119       | -0.896 | -0.442 | 8  | -6.415          | 0.972  | -0.579 |
| 7  | -1.109      | -0.697 | 0.265  | 8  | -6.326          | -1.166 | -0.948 |
| 7  | -2.949      | -0.459 | 2.115  | 7  | 1.953           | -0.014 | 0.501  |
| 6  | 1.074       | 0.020  | -0.907 | 7  | -5.835          | -0.106 | -0.584 |
| 6  | 0.020       | -1.051 | -0.520 | 6  | 0.580           | 0.029  | -0.006 |
| 6  | 3.259       | -0.314 | 0.232  | 6  | -0.375          | -0.174 | 1.188  |
| 6  | 3.052       | 1.242  | 0.257  | 6  | -1.815          | -0.169 | 0.756  |
| 6  | 1.194       | -1.719 | 0.206  | 6  | 0.361           | 1.321  | -0.769 |
| 6  | -3.446      | -0.221 | 0.749  | 6  | -2.536          | 1.027  | 0.748  |
| 6  | 3.656       | 1.913  | -0.973 | 6  | -2.429          | -1.347 | 0.325  |
| 6  | 3.598       | 1.857  | 1.536  | 6  | 2.936           | -0.617 | -0.243 |
| 6  | -3.571      | 1.304  | 0.573  | 6  | -3.851          | 1.058  | 0.309  |
| 6  | -4.808      | -0.889 | 0.487  | 6  | -3.745          | -1.333 | -0.113 |
| 6  | -2.378      | -0.722 | -0.239 | 6  | -4.435          | -0.128 | -0.117 |
| 6  | 4.568       | -0.689 | -0.436 | 6  | 4.347           | -0.212 | 0.227  |
| 6  | -4.219      | 1.705  | -0.745 | 1  | 0.471           | -0.820 | -0.688 |
| 6  | -5.520      | -0.443 | -0.787 | 1  | -0.217          | 0.658  | 1.894  |
| 6  | -5.601      | 1.076  | -0.880 | 1  | -0.653          | 1.348  | -1.190 |
| 1  | 1.147       | 0.317  | -1.956 | 1  | 1.078           | 1.369  | -1.599 |
| 1  | -0.330      | -1.605 | -1.396 | 1  | 2.223           | 0.830  | 0.999  |
| 1  | 3.281       | -0.693 | 1.262  | 1  | -2.055          | 1.939  | 1.090  |
| 1  | -1.011      | -0.439 | 1.241  | 1  | -1.870          | -2.275 | 0.354  |
| 1  | 3.395       | 2.972  | -0.990 | 1  | 0.863           | -1.471 | 1.898  |
| 1  | 4.749       | 1.838  | -0.958 | 1  | -4.432          | 1.971  | 0.297  |
| 1  | 3.306       | 1.460  | -1.904 | 1  | -4.246          | -2.232 | -0.449 |
| 1  | 3.419       | 2.935  | 1.554  | 1  | 0.623           | 3.211  | -0.330 |
| 1  | 3.135       | 1.416  | 2.421  | 1  | 4.437           | -0.268 | 1.313  |
| 1  | 4.678       | 1.697  | 1.595  |    |                 |        |        |
| 1  | -2.585      | 1.765  | 0.699  |    |                 |        |        |
| 1  | -4.193      | 1.672  | 1.403  |    |                 |        |        |
| 1  | -5.438      | -0.640 | 1.354  |    |                 |        |        |
| 1  | -4.685      | -1.978 | 0.499  |    |                 |        |        |
| 1  | -3.587      | 1.382  | -1.582 |    |                 |        |        |
| 1  | -4.281      | 2.796  | -0.804 |    |                 |        |        |
| 1  | -6.524      | -0.880 | -0.809 |    |                 |        |        |
| 1  | -4.984      | -0.833 | -1.655 |    |                 |        |        |
| 1  | -6.249      | 1.463  | -0.080 |    |                 |        |        |
| 1  | -6.067      | 1.374  | -1.824 |    |                 |        |        |
| 1  | -3.047      | -1.445 | 2.348  |    |                 |        |        |
| 1  | -3.540      | 0.041  | 2.773  |    |                 |        |        |
| 1  | 6.411       | -0.676 | -0.068 |    |                 |        |        |
|    | Eplerenone  |        |        |    | Aprepitant      |        |        |
| 8  | 0.685       | -0.045 | -1.439 | 9  | 0.359           | 4.710  | -0.162 |

|    |                         |        |        |   |               |        |        |
|----|-------------------------|--------|--------|---|---------------|--------|--------|
| 8  | -4.467                  | -1.108 | 0.133  | 9 | 4.641         | 2.752  | 0.834  |
| 8  | 2.260                   | 2.287  | -0.569 | 9 | 3.228         | 2.876  | -0.797 |
| 8  | 0.237                   | 3.168  | -0.118 | 9 | 2.522         | 2.936  | 1.250  |
| 8  | -6.544                  | -1.390 | -0.663 | 9 | 5.317         | -3.402 | -0.199 |
| 8  | 6.406                   | -0.742 | -0.456 | 9 | 5.635         | -1.971 | -1.793 |
| 6  | 0.862                   | -0.616 | -0.137 | 9 | 6.606         | -1.688 | 0.117  |
| 6  | 0.202                   | 0.207  | 0.961  | 8 | -1.058        | -2.775 | -0.779 |
| 6  | -2.040                  | -0.680 | 0.186  | 8 | -0.416        | -1.170 | 0.775  |
| 6  | -1.232                  | 0.558  | 0.605  | 8 | -8.523        | -0.988 | 0.298  |
| 6  | 0.014                   | -1.276 | -1.144 | 7 | -2.995        | -0.705 | -0.477 |
| 6  | 2.270                   | -1.156 | 0.193  | 7 | -6.385        | -0.656 | -0.645 |
| 6  | -1.499                  | -1.235 | -1.129 | 7 | -5.544        | 0.754  | 0.831  |
| 6  | -3.456                  | -0.067 | 0.173  | 7 | -6.818        | 0.378  | 1.171  |
| 6  | 1.095                   | 1.419  | 1.303  | 6 | -1.694        | -0.436 | -1.096 |
| 6  | -2.066                  | 1.216  | 1.718  | 6 | -0.654        | -1.442 | -0.582 |
| 6  | -3.506                  | 0.710  | 1.499  | 6 | -3.374        | -2.102 | -0.664 |
| 6  | 3.122                   | -0.048 | 0.801  | 6 | -2.307        | -3.029 | -0.137 |
| 6  | 2.462                   | 0.903  | 1.757  | 6 | -1.203        | 0.968  | -0.854 |
| 6  | -1.965                  | -1.793 | 1.241  | 6 | -4.023        | 0.181  | -1.024 |
| 6  | 2.960                   | -1.698 | -1.068 | 6 | 0.745         | -1.820 | 1.297  |
| 6  | -3.815                  | 0.843  | -1.011 | 6 | -5.305        | 0.108  | -0.271 |
| 6  | 2.105                   | -2.285 | 1.230  | 6 | -1.439        | 1.620  | 0.360  |
| 6  | 1.129                   | 2.397  | 0.146  | 6 | -0.434        | 1.607  | -1.825 |
| 6  | 4.427                   | -2.031 | -0.851 | 6 | 2.008         | -1.147 | 0.806  |
| 6  | -5.324                  | 0.691  | -1.089 | 6 | 0.624         | -1.762 | 2.806  |
| 6  | 4.442                   | 0.058  | 0.556  | 6 | -0.919        | 2.885  | 0.597  |
| 6  | -5.571                  | -0.701 | -0.552 | 6 | 0.101         | 2.872  | -1.602 |
| 6  | 5.206                   | -0.874 | -0.272 | 6 | 3.102         | -1.907 | 0.400  |
| 6  | 2.298                   | 3.056  | -1.776 | 6 | 2.106         | 0.244  | 0.804  |
| 1  | 0.181                   | -0.405 | 1.874  | 6 | -0.153        | 3.487  | -0.390 |
| 1  | -1.208                  | 1.234  | -0.257 | 6 | 4.285         | -1.285 | 0.013  |
| 1  | 0.446                   | -2.121 | -1.681 | 6 | 3.296         | 0.859  | 0.430  |
| 1  | -1.806                  | -0.632 | -1.988 | 6 | -7.418        | -0.493 | 0.286  |
| 1  | -1.890                  | -2.244 | -1.304 | 6 | 4.391         | 0.100  | 0.029  |
| 1  | 0.619                   | 1.960  | 2.128  | 6 | 3.417         | 2.355  | 0.435  |
| 1  | -1.991                  | 2.305  | 1.671  | 6 | 5.457         | -2.092 | -0.460 |
| 1  | -1.700                  | 0.921  | 2.708  | 1 | -1.746        | -0.608 | -2.192 |
| 1  | -3.822                  | 0.033  | 2.296  | 1 | 0.269         | -1.336 | -1.170 |
| 1  | -4.243                  | 1.517  | 1.465  | 1 | -3.554        | -2.321 | -1.737 |
| 1  | 2.300                   | 0.373  | 2.708  | 1 | -4.310        | -2.289 | -0.128 |
| 1  | 3.145                   | 1.726  | 1.981  | 1 | -2.199        | -2.910 | 0.949  |
| 1  | -2.128                  | -1.427 | 2.257  | 1 | -2.552        | -4.070 | -0.354 |
| 1  | -2.716                  | -2.559 | 1.040  | 1 | -3.658        | 1.208  | -0.970 |
| 1  | -0.984                  | -2.276 | 1.222  | 1 | -4.215        | -0.040 | -2.093 |
| 1  | 2.869                   | -0.943 | -1.855 | 1 | 0.747         | -2.868 | 0.963  |
| 1  | 2.433                   | -2.590 | -1.424 | 1 | -2.037        | 1.121  | 1.116  |
| 1  | -3.358                  | 0.490  | -1.938 | 1 | -0.247        | 1.110  | -2.773 |
| 1  | -3.478                  | 1.869  | -0.851 | 1 | -0.284        | -2.270 | 3.135  |
| 1  | 1.653                   | -1.935 | 2.161  | 1 | 1.484         | -2.236 | 3.282  |
| 1  | 1.469                   | -3.079 | 0.828  | 1 | 0.576         | -0.722 | 3.141  |
| 1  | 3.072                   | -2.723 | 1.489  | 1 | -1.095        | 3.407  | 1.531  |
| 1  | 4.910                   | -2.347 | -1.779 | 1 | 0.708         | 3.375  | -2.345 |
| 1  | 4.541                   | -2.874 | -0.156 | 1 | -6.471        | -1.228 | -1.470 |
| 1  | -5.754                  | 0.801  | -2.083 | 1 | 3.034         | -2.990 | 0.390  |
| 1  | -5.849                  | 1.396  | -0.435 | 1 | 1.249         | 0.844  | 1.101  |
| 1  | 5.013                   | 0.868  | 1.002  | 1 | 5.318         | 0.584  | -0.257 |
| 1  | 2.158                   | 4.117  | -1.562 | 1 | -7.257        | 0.773  | 1.985  |
| 1  | 1.512                   | 2.718  | -2.454 |   |               |        |        |
| 1  | 3.280                   | 2.878  | -2.210 |   |               |        |        |
|    | chlorphenesin carbamate |        |        |   | Dexamethasone |        |        |
| 17 | 6.108                   | -0.580 | 0.031  | 9 | 1.475         | -0.064 | -1.291 |
| 8  | 0.396                   | 0.801  | -0.178 | 8 | -2.779        | 0.418  | -1.821 |
| 8  | -1.995                  | 1.502  | 0.942  | 8 | 0.424         | -2.108 | 1.492  |
| 8  | -4.287                  | 0.259  | -0.206 | 8 | -4.765        | -0.408 | 0.978  |
| 8  | -5.408                  | -1.666 | 0.236  | 8 | -5.662        | -2.297 | -0.605 |
| 7  | -6.501                  | 0.241  | -0.417 | 8 | 6.180         | -0.305 | -1.853 |
| 6  | -1.934                  | 0.540  | -0.093 | 6 | -1.631        | -0.145 | 0.309  |
| 6  | -0.609                  | -0.197 | -0.064 | 6 | -0.751        | 1.090  | 0.061  |
| 6  | -3.073                  | -0.428 | 0.098  | 6 | 0.642         | 0.978  | 0.666  |
| 6  | 1.700                   | 0.406  | -0.118 | 6 | 1.339         | -0.275 | 0.111  |
| 6  | 2.112                   | -0.919 | 0.019  | 6 | -2.942        | 0.350  | -0.403 |
| 6  | 2.652                   | 1.424  | -0.210 | 6 | -1.640        | 2.265  | 0.459  |
| 6  | 3.470                   | -1.219 | 0.066  | 6 | -0.945        | -1.351 | -0.328 |
| 6  | 4.002                   | 1.124  | -0.164 | 6 | -3.080        | 1.805  | 0.118  |
| 6  | 4.407                   | -0.201 | -0.026 | 6 | 0.485         | -1.565 | 0.177  |
| 6  | -5.405                  | -0.500 | -0.082 | 6 | 2.815         | -0.425 | 0.632  |
| 1  | -2.041                  | 1.027  | -1.076 | 6 | 1.462         | 2.234  | 0.373  |
| 1  | -0.534                  | -0.912 | -0.894 | 6 | -1.909        | -0.388 | 1.796  |
| 1  | -0.492                  | -0.742 | 0.884  | 6 | 2.920         | 2.107  | 0.808  |
| 1  | -3.101                  | -0.791 | 1.131  | 6 | 3.529         | 0.859  | 0.256  |
| 1  | -2.966                  | -1.296 | -0.562 | 6 | -4.160        | -0.499 | -0.074 |
| 1  | -1.212                  | 2.055  | 0.854  | 6 | -3.817        | 2.718  | -0.846 |
| 1  | 1.392                   | -1.724 | 0.089  | 6 | 2.914         | -0.583 | 2.170  |
| 1  | 2.315                   | 2.449  | -0.320 | 6 | 3.458         | -1.635 | 0.020  |





|   |              |        |        |   |           |        |        |
|---|--------------|--------|--------|---|-----------|--------|--------|
| 8 | -2.170       | -2.825 | 0.673  | 8 | 2.675     | 0.558  | -0.041 |
| 8 | -5.192       | -0.401 | -1.062 | 8 | 3.545     | 1.638  | -1.839 |
| 7 | 2.404        | -1.062 | 0.708  | 7 | -3.786    | -1.176 | -0.920 |
| 7 | -0.826       | -1.093 | 0.058  | 7 | -0.964    | 0.510  | -1.303 |
| 7 | -4.502       | 0.814  | -0.981 | 6 | -2.482    | -1.290 | -0.261 |
| 6 | 1.624        | -1.700 | -0.355 | 6 | -4.422    | -0.796 | 1.400  |
| 6 | 3.367        | 0.023  | -1.251 | 6 | -4.931    | -0.893 | -0.082 |
| 6 | 3.393        | -0.082 | 0.314  | 6 | -1.845    | -0.592 | -1.491 |
| 6 | 0.380        | -1.644 | 0.569  | 6 | -3.299    | -0.268 | -1.864 |
| 6 | 1.256        | -0.711 | 1.425  | 6 | -4.464    | -2.150 | 2.102  |
| 6 | 4.353        | -0.944 | -1.901 | 6 | -5.193    | 0.251  | 2.187  |
| 6 | 3.615        | 1.449  | -1.717 | 6 | -6.017    | -1.942 | -0.228 |
| 6 | 4.777        | -0.433 | 0.825  | 6 | 0.353     | 0.448  | -1.660 |
| 6 | -2.050       | -1.698 | 0.215  | 6 | 1.163     | 1.727  | -1.413 |
| 6 | -3.193       | -0.895 | -0.256 | 6 | 0.626     | 2.674  | -0.364 |
| 6 | -3.319       | 0.508  | -0.502 | 6 | 2.608     | 1.322  | -1.162 |
| 6 | -4.413       | -1.398 | -0.623 | 6 | 7.386     | -3.154 | 0.192  |
| 6 | -2.324       | 1.575  | -0.299 | 6 | 6.543     | -2.512 | -0.920 |
| 6 | -4.991       | -2.754 | -0.627 | 6 | 7.471     | -2.086 | 1.293  |
| 6 | -1.771       | 1.840  | 0.963  | 6 | 5.672     | -1.545 | -0.170 |
| 6 | -1.873       | 2.327  | -1.388 | 6 | 6.203     | -1.300 | 1.101  |
| 6 | -0.774       | 2.795  | 1.126  | 6 | 4.509     | -0.916 | -0.589 |
| 6 | -0.888       | 3.293  | -1.232 | 6 | 3.895     | -0.036 | 0.295  |
| 6 | -0.333       | 3.517  | 0.024  | 6 | 0.371     | 4.005  | -0.699 |
| 1 | 1.988        | -2.676 | -0.682 | 6 | 0.368     | 2.248  | 0.945  |
| 1 | 3.105        | 0.885  | 0.747  | 6 | 5.571     | -0.418 | 1.968  |
| 1 | 0.148        | -2.602 | 1.041  | 6 | 4.402     | 0.221  | 1.560  |
| 1 | 4.215        | -1.970 | -1.551 | 6 | -0.130    | 4.894  | 0.246  |
| 1 | 4.230        | -0.935 | -2.985 | 6 | -0.137    | 3.135  | 1.887  |
| 1 | 5.385        | -0.653 | -1.680 | 6 | -0.386    | 4.461  | 1.542  |
| 1 | 3.564        | 1.516  | -2.806 | 1 | -2.165    | -2.308 | -0.023 |
| 1 | 2.882        | 2.140  | -1.295 | 1 | -5.348    | 0.075  | -0.387 |
| 1 | 4.613        | 1.773  | -1.409 | 1 | -1.362    | -1.303 | -2.166 |
| 1 | -0.780       | -0.154 | -0.317 | 1 | -3.996    | -2.079 | 3.085  |
| 1 | 6.450        | 0.385  | 1.085  | 1 | -5.499    | -2.478 | 2.248  |
| 1 | -5.525       | -2.944 | -1.560 | 1 | -3.948    | -2.927 | 1.533  |
| 1 | -4.204       | -3.491 | -0.482 | 1 | -5.126    | 1.235  | 1.717  |
| 1 | -5.707       | -2.864 | 0.192  | 1 | -6.247    | -0.031 | 2.247  |
| 1 | -2.306       | 2.129  | -2.363 | 1 | -4.810    | 0.329  | 3.207  |
| 1 | -0.354       | 2.958  | 2.111  | 1 | -1.310    | 1.328  | -0.819 |
| 1 | -0.550       | 3.863  | -2.090 | 1 | 1.179     | 2.249  | -2.376 |
| 1 | 0.445        | 4.262  | 0.154  | 1 | -7.838    | -2.171 | 0.174  |
|   |              |        |        | 1 | 6.860     | -4.032 | 0.581  |
|   |              |        |        | 1 | 8.365     | -3.495 | -0.153 |
|   |              |        |        | 1 | 5.977     | -3.239 | -1.509 |
|   |              |        |        | 1 | 7.178     | -1.966 | -1.631 |
|   |              |        |        | 1 | 8.343     | -1.435 | 1.142  |
|   |              |        |        | 1 | 7.572     | -2.509 | 2.296  |
|   |              |        |        | 1 | 4.072     | -1.095 | -1.566 |
|   |              |        |        | 1 | 0.568     | 4.345  | -1.712 |
|   |              |        |        | 1 | 0.563     | 1.216  | 1.220  |
|   |              |        |        | 1 | 5.975     | -0.225 | 2.957  |
|   |              |        |        | 1 | 3.876     | 0.911  | 2.211  |
|   |              |        |        | 1 | -0.321    | 5.925  | -0.033 |
|   |              |        |        | 1 | -0.340    | 2.788  | 2.895  |
|   |              |        |        | 1 | -0.779    | 5.152  | 2.280  |
|   | Capecitabine |        |        |   | Felbamate |        |        |
| 9 | -0.022       | 2.653  | -0.447 | 8 | -2.372    | -0.738 | -0.506 |
| 8 | -4.569       | 1.002  | -0.800 | 8 | 2.372     | -0.737 | -0.506 |
| 8 | -4.775       | -2.284 | 0.438  | 8 | -3.708    | -1.964 | 0.863  |
| 8 | -6.827       | -0.762 | -0.146 | 8 | 3.709     | -1.963 | 0.863  |
| 8 | -2.165       | -2.220 | -0.300 | 7 | -4.578    | -0.554 | -0.722 |
| 8 | 3.764        | 0.269  | -0.052 | 7 | 4.579     | -0.553 | -0.722 |
| 8 | 2.510        | -1.625 | -0.029 | 6 | 0.000     | -0.637 | -0.419 |
| 7 | -2.453       | 0.027  | -0.465 | 6 | 0.000     | 0.842  | -0.105 |
| 7 | -0.278       | -0.933 | -0.252 | 6 | -1.235    | -1.337 | 0.123  |
| 7 | 1.580        | 0.502  | -0.201 | 6 | 1.235     | -1.337 | 0.123  |
| 6 | -4.541       | -0.917 | 0.604  | 6 | 0.000     | 1.293  | 1.216  |
| 6 | -5.883       | -0.196 | 0.730  | 6 | -0.001    | 1.785  | -1.131 |
| 6 | -3.915       | -0.217 | -0.625 | 6 | 0.000     | 2.653  | 1.504  |
| 6 | -5.548       | 1.205  | 0.255  | 6 | -0.001    | 3.148  | -0.848 |
| 6 | -4.995       | 2.114  | 1.332  | 6 | -0.001    | 3.586  | 0.471  |
| 6 | -1.935       | 1.275  | -0.513 | 6 | -3.570    | -1.155 | -0.023 |
| 6 | -1.624       | -1.120 | -0.334 | 6 | 3.571     | -1.154 | -0.023 |
| 6 | -0.594       | 1.427  | -0.410 | 6 | 0.000     | -0.756 | -1.510 |
| 6 | 0.225        | 0.275  | -0.284 | 1 | -1.220    | -2.410 | -0.098 |
| 6 | 7.453        | -0.377 | 0.209  | 1 | -1.323    | -1.231 | 1.210  |
| 6 | 6.142        | 0.386  | 0.090  | 1 | 1.221     | -2.410 | -0.098 |
| 6 | 8.673        | 0.532  | 0.239  | 1 | 1.323     | -1.230 | 1.210  |
| 6 | 4.953        | -0.539 | 0.063  | 1 | 0.000     | 0.575  | 2.033  |
| 6 | 2.609        | -0.434 | -0.087 | 1 | -0.001    | 1.444  | -2.162 |
| 6 | 9.979        | -0.234 | 0.356  | 1 | 0.000     | 2.986  | 2.537  |
| 1 | -3.915       | -0.717 | 1.488  | 1 | -0.001    | 3.868  | -1.661 |
| 1 | -6.248       | -0.199 | 1.769  | 1 | -0.001    | 4.648  | 0.695  |



|            |        |        |        |             |        |        |        |
|------------|--------|--------|--------|-------------|--------|--------|--------|
| 1          | -4.025 | -0.847 | -1.517 | 1           | -4.361 | 0.280  | -1.243 |
| 1          | -6.417 | 1.655  | -0.233 | 1           | -5.489 | -0.602 | -0.297 |
| 1          | -5.759 | 2.329  | 2.082  | 1           | 4.361  | 0.281  | -1.244 |
| 1          | -4.669 | 3.064  | 0.904  | 1           | 5.489  | -0.601 | -0.298 |
| 1          | -4.141 | 1.661  | 1.845  |             |        |        |        |
| 1          | -3.920 | -2.664 | 0.170  |             |        |        |        |
| 1          | -6.639 | -1.710 | -0.168 |             |        |        |        |
| 1          | -2.629 | 2.096  | -0.640 |             |        |        |        |
| 1          | 7.545  | -1.083 | -0.628 |             |        |        |        |
| 1          | 7.438  | -0.997 | 1.115  |             |        |        |        |
| 1          | 6.037  | 1.085  | 0.929  |             |        |        |        |
| 1          | 6.144  | 0.998  | -0.819 |             |        |        |        |
| 1          | 1.874  | 1.468  | -0.238 |             |        |        |        |
| 1          | 8.577  | 1.236  | 1.076  |             |        |        |        |
| 1          | 8.684  | 1.151  | -0.667 |             |        |        |        |
| 1          | 4.989  | -1.233 | -0.784 |             |        |        |        |
| 1          | 4.879  | -1.145 | 0.973  |             |        |        |        |
| 1          | 10.007 | -0.835 | 1.270  |             |        |        |        |
| 1          | 10.114 | -0.919 | -0.486 |             |        |        |        |
| 1          | 10.843 | 0.434  | 0.377  |             |        |        |        |
| Cephradine |        |        |        | Dyphylline  |        |        |        |
| 16         | 0.098  | 0.990  | -0.637 | 8           | -3.184 | -1.185 | 0.919  |
| 8          | 1.919  | -2.207 | 1.540  | 8           | -0.250 | 2.020  | -0.706 |
| 8          | -2.176 | -2.226 | -1.525 | 8           | -4.741 | 1.025  | 1.086  |
| 8          | 5.107  | 0.446  | 1.095  | 8           | 4.026  | 0.904  | 0.580  |
| 8          | 4.702  | -1.563 | 0.164  | 7           | -0.792 | -1.000 | -0.730 |
| 7          | 2.112  | -0.787 | -0.360 | 7           | 2.567  | -0.827 | 0.243  |
| 7          | -0.941 | -1.728 | 0.312  | 7           | 1.898  | 1.436  | -0.059 |
| 7          | -4.522 | -2.048 | -0.171 | 7           | 0.819  | -2.461 | -0.173 |
| 6          | 0.882  | -0.587 | -1.105 | 6           | 0.336  | -0.260 | -0.430 |
| 6          | 0.304  | -1.831 | -0.378 | 6           | -2.103 | -0.459 | -1.046 |
| 6          | 1.560  | -1.743 | 0.496  | 6           | 1.293  | -1.194 | -0.102 |
| 6          | 3.112  | 0.174  | -0.155 | 6           | -2.841 | -0.014 | 0.201  |
| 6          | 1.587  | 1.959  | -1.036 | 6           | 0.562  | 1.144  | -0.433 |
| 6          | 2.905  | 1.466  | -0.499 | 6           | -0.445 | -2.295 | -0.545 |
| 6          | -2.122 | -1.856 | -0.365 | 6           | 2.912  | 0.521  | 0.277  |
| 6          | -3.355 | -1.432 | 0.435  | 6           | -4.075 | 0.793  | -0.147 |
| 6          | 3.943  | 2.541  | -0.459 | 6           | 3.554  | -1.838 | 0.581  |
| 6          | 4.371  | -0.421 | 0.361  | 6           | 2.301  | 2.836  | -0.008 |
| 6          | -3.355 | 0.084  | 0.504  | 1           | -1.968 | 0.384  | -1.727 |
| 6          | -3.552 | 0.825  | -0.787 | 1           | -2.676 | -1.241 | -1.551 |
| 6          | -3.152 | 0.714  | 1.665  | 1           | -2.173 | 0.625  | 0.802  |
| 6          | -3.077 | 2.197  | 1.817  | 1           | -1.161 | -3.092 | -0.687 |
| 6          | -3.492 | 2.309  | -0.633 | 1           | -4.713 | 0.223  | -0.840 |
| 6          | -3.278 | 2.925  | 0.528  | 1           | -3.777 | 1.733  | -0.631 |
| 1          | 1.008  | -0.646 | -2.189 | 1           | 4.482  | -1.327 | 0.823  |
| 1          | 0.284  | -2.700 | -1.040 | 1           | 3.705  | -2.514 | -0.263 |
| 1          | -0.952 | -1.261 | 1.209  | 1           | 3.213  | -2.425 | 1.436  |
| 1          | 1.397  | 2.959  | -0.634 | 1           | 1.440  | 3.435  | -0.290 |
| 1          | 1.657  | 2.087  | -2.125 | 1           | 3.131  | 3.014  | -0.694 |
| 1          | -3.235 | -1.807 | 1.462  | 1           | 2.633  | 3.096  | 0.998  |
| 1          | 4.962  | 2.162  | -0.460 | 1           | -3.769 | -0.905 | 1.632  |
| 1          | 3.825  | 3.157  | 0.440  | 1           | -5.588 | 1.440  | 0.911  |
| 1          | 3.818  | 3.210  | -1.316 |             |        |        |        |
| 1          | -4.510 | 0.531  | -1.243 |             |        |        |        |
| 1          | -2.803 | 0.495  | -1.524 |             |        |        |        |
| 1          | -3.023 | 0.117  | 2.569  |             |        |        |        |
| 1          | -4.375 | -2.114 | -1.176 |             |        |        |        |
| 1          | -5.349 | -1.485 | -0.007 |             |        |        |        |
| 1          | -2.107 | 2.474  | 2.259  |             |        |        |        |
| 1          | -3.812 | 2.538  | 2.563  |             |        |        |        |
| 1          | -3.630 | 2.900  | -1.536 |             |        |        |        |
| 1          | -3.247 | 4.011  | 0.563  |             |        |        |        |
| 1          | 5.889  | -0.048 | 1.380  |             |        |        |        |
| Busulfan   |        |        |        | Clavulanate |        |        |        |
| 16         | 4.470  | 0.173  | 0.000  | 8           | 0.330  | -0.903 | 1.030  |
| 16         | -4.470 | -0.173 | 0.000  | 8           | -2.378 | -1.498 | -1.736 |
| 8          | 2.994  | -0.538 | 0.000  | 8           | 0.039  | 2.973  | -0.780 |
| 8          | -2.994 | 0.538  | 0.001  | 8           | -1.151 | 2.449  | 1.065  |
| 8          | 4.656  | 0.874  | 1.253  | 8           | 3.787  | -1.370 | -0.553 |
| 8          | 4.657  | 0.872  | -1.254 | 7           | -1.583 | -0.127 | 0.033  |
| 8          | -4.656 | -0.874 | 1.253  | 6           | -1.094 | -0.882 | 1.178  |
| 8          | -4.656 | -0.871 | -1.255 | 6           | -0.520 | 0.705  | -0.486 |
| 6          | 0.620  | -0.441 | 0.000  | 6           | -1.801 | -2.133 | 0.654  |
| 6          | -0.620 | 0.441  | 0.000  | 6           | -2.030 | -1.307 | -0.608 |
| 6          | 1.882  | 0.384  | 0.000  | 6           | 0.716  | 0.015  | 0.091  |
| 6          | -1.882 | -0.384 | 0.001  | 6           | -0.613 | 2.125  | 0.040  |
| 6          | 5.401  | -1.339 | 0.001  | 6           | 1.990  | 0.244  | -0.228 |
| 6          | -5.401 | 1.339  | 0.002  | 6           | 3.155  | -0.475 | 0.362  |
| 1          | 0.621  | -1.097 | 0.878  | 1           | -1.342 | -0.480 | 2.163  |
| 1          | 0.621  | -1.097 | -0.878 | 1           | -0.518 | 0.698  | -1.579 |
| 1          | -0.621 | 1.096  | -0.879 | 1           | -2.703 | -2.434 | 1.190  |
| 1          | -0.621 | 1.097  | 0.878  | 1           | -1.152 | -2.996 | 0.509  |
| 1          | 1.946  | 1.022  | -0.890 | 1           | 2.173  | 0.997  | -0.990 |

|    |              |        |        |   |                   |        |        |
|----|--------------|--------|--------|---|-------------------|--------|--------|
| 1  | 1.946        | 1.022  | 0.890  | 1 | 2.835             | -1.094 | 1.200  |
| 1  | -1.946       | -1.022 | 0.891  | 1 | 3.888             | 0.249  | 0.751  |
| 1  | -1.947       | -1.023 | -0.889 | 1 | 0.005             | 3.849  | -0.369 |
| 1  | 5.158        | -1.900 | 0.901  | 1 | 4.065             | -0.862 | -1.319 |
| 1  | 5.159        | -1.902 | -0.898 |   |                   |        |        |
| 1  | 6.452        | -1.054 | 0.001  |   |                   |        |        |
| 1  | -6.452       | 1.054  | 0.001  |   |                   |        |        |
| 1  | -5.158       | 1.900  | 0.902  |   |                   |        |        |
| 1  | -5.158       | 1.902  | -0.897 |   |                   |        |        |
|    | Halofantrine |        |        |   | Ambrisentan       |        |        |
| 17 | -3.942       | -4.045 | -0.353 | 8 | 2.165             | -0.360 | -1.814 |
| 17 | -6.884       | 0.402  | 0.235  | 8 | -0.709            | 0.062  | 0.366  |
| 9  | 0.132        | 4.829  | -0.414 | 8 | -0.297            | -1.607 | -2.742 |
| 9  | -1.795       | 4.751  | 0.581  | 8 | -0.802            | -2.482 | -0.728 |
| 9  | 0.036        | 4.625  | 1.734  | 7 | -2.675            | 0.048  | -0.818 |
| 8  | 0.917        | -3.544 | -0.149 | 7 | -2.576            | 0.383  | 1.552  |
| 7  | 3.699        | -0.855 | -0.836 | 6 | 1.466             | -0.041 | -0.605 |
| 6  | 3.094        | -1.927 | -1.631 | 6 | -0.062            | -0.179 | -0.873 |
| 6  | 1.577        | -1.831 | -1.634 | 6 | 1.905             | -1.085 | 0.415  |
| 6  | 0.976        | -2.126 | -0.259 | 6 | 1.842             | 1.370  | -0.157 |
| 6  | 4.977        | -1.258 | -0.254 | 6 | 1.698             | -0.865 | 1.778  |
| 6  | 3.788        | 0.381  | -1.611 | 6 | 3.176             | 1.587  | 0.202  |
| 6  | -0.370       | -1.460 | -0.089 | 6 | 2.481             | -2.286 | 0.002  |
| 6  | 4.808        | -2.161 | 0.957  | 6 | 0.972             | 2.458  | -0.174 |
| 6  | 4.089        | 1.619  | -0.777 | 6 | -0.437            | -1.556 | -1.400 |
| 6  | -0.429       | -0.036 | 0.110  | 6 | 2.024             | 0.545  | -2.892 |
| 6  | -1.691       | 0.617  | 0.193  | 6 | 2.058             | -1.830 | 2.710  |
| 6  | -1.523       | -2.179 | -0.171 | 6 | 3.627             | 2.855  | 0.540  |
| 6  | -2.911       | -0.162 | 0.110  | 6 | 2.847             | -3.248 | 0.938  |
| 6  | -2.806       | -1.571 | -0.067 | 6 | 1.421             | 3.732  | 0.169  |
| 6  | 6.136        | -2.617 | 1.545  | 6 | 2.637             | -3.025 | 2.293  |
| 6  | 3.699        | 2.909  | -1.488 | 6 | 2.747             | 3.934  | 0.527  |
| 6  | 0.751        | 0.736  | 0.220  | 6 | -2.053            | 0.162  | 0.351  |
| 6  | -1.713       | 2.017  | 0.351  | 6 | -4.013            | 0.147  | -0.777 |
| 6  | -0.546       | 2.743  | 0.439  | 6 | -3.908            | 0.481  | 1.585  |
| 6  | -4.183       | 0.432  | 0.201  | 6 | -4.677            | 0.363  | 0.425  |
| 6  | 0.698        | 2.097  | 0.387  | 6 | -4.731            | 0.007  | -2.077 |
| 6  | -4.007       | -2.317 | -0.142 | 6 | -4.525            | 0.722  | 2.922  |
| 6  | 5.969        | -3.501 | 2.769  | 1 | -0.383            | 0.561  | -1.614 |
| 6  | 3.951        | 4.151  | -0.651 | 1 | 1.246             | 0.064  | 2.108  |
| 6  | -5.317       | -0.345 | 0.120  | 1 | 3.860             | 0.743  | 0.209  |
| 6  | -5.249       | -1.731 | -0.053 | 1 | 2.646             | -2.459 | -1.055 |
| 6  | -0.557       | 4.231  | 0.585  | 1 | -0.070            | 2.330  | -0.447 |
| 1  | 3.483        | -1.921 | -2.665 | 1 | 2.361             | 1.554  | -2.628 |
| 1  | 3.381        | -2.891 | -1.201 | 1 | 0.995             | 0.593  | -3.269 |
| 1  | 1.264        | -0.837 | -1.970 | 1 | 2.659             | 0.158  | -3.690 |
| 1  | 1.145        | -2.545 | -2.343 | 1 | 1.888             | -1.646 | 3.766  |
| 1  | 1.668        | -1.734 | 0.502  | 1 | 4.666             | 3.002  | 0.816  |
| 1  | 5.625        | -1.748 | -1.008 | 1 | 3.298             | -4.177 | 0.603  |
| 1  | 5.512        | -0.355 | 0.058  | 1 | 0.727             | 4.566  | 0.156  |
| 1  | 4.522        | 0.288  | -2.436 | 1 | 2.921             | -3.778 | 3.022  |
| 1  | 2.815        | 0.527  | -2.097 | 1 | 3.095             | 4.926  | 0.796  |
| 1  | 4.206        | -3.041 | 0.694  | 1 | -0.514            | -2.512 | -3.005 |
| 1  | 4.227        | -1.620 | 1.716  | 1 | -5.757            | 0.440  | 0.460  |
| 1  | 3.552        | 1.541  | 0.178  | 1 | -5.808            | 0.134  | -1.965 |
| 1  | 5.153        | 1.662  | -0.511 | 1 | -4.361            | 0.740  | -2.798 |
| 1  | -1.464       | -3.249 | -0.334 | 1 | -4.538            | -0.979 | -2.509 |
| 1  | 6.708        | -3.151 | 0.776  | 1 | -4.282            | -0.100 | 3.601  |
| 1  | 6.740        | -1.737 | 1.802  | 1 | -4.113            | 1.628  | 3.372  |
| 1  | 4.245        | 2.981  | -2.437 | 1 | -5.610            | 0.818  | 2.862  |
| 1  | 2.637        | 2.860  | -1.764 |   |                   |        |        |
| 1  | 1.720        | 0.248  | 0.168  |   |                   |        |        |
| 1  | -2.655       | 2.548  | 0.400  |   |                   |        |        |
| 1  | 0.708        | -3.765 | 0.763  |   |                   |        |        |
| 1  | -4.294       | 1.499  | 0.338  |   |                   |        |        |
| 1  | 1.611        | 2.677  | 0.474  |   |                   |        |        |
| 1  | 5.431        | -2.979 | 3.565  |   |                   |        |        |
| 1  | 5.400        | -4.404 | 2.531  |   |                   |        |        |
| 1  | 6.931        | -3.818 | 3.177  |   |                   |        |        |
| 1  | 3.378        | 4.128  | 0.282  |   |                   |        |        |
| 1  | 3.667        | 5.063  | -1.181 |   |                   |        |        |
| 1  | 5.007        | 4.242  | -0.377 |   |                   |        |        |
| 1  | -6.150       | -2.326 | -0.114 |   |                   |        |        |
|    | Enalapril    |        |        |   | cortisone acetate |        |        |
| 8  | 1.570        | -1.691 | -0.439 | 8 | -2.238            | 1.412  | -1.984 |
| 8  | 4.799        | -2.324 | -1.931 | 8 | 0.683             | -2.254 | 0.240  |
| 8  | 4.685        | -2.189 | 0.315  | 8 | -4.384            | 0.956  | 0.768  |
| 8  | 0.016        | 1.776  | -0.480 | 8 | -5.376            | -0.987 | -0.816 |
| 8  | -1.299       | 2.045  | 1.331  | 8 | 6.994             | -0.983 | -1.082 |
| 7  | 2.964        | -0.002 | 0.080  | 8 | -3.896            | -2.037 | 0.516  |
| 7  | -0.305       | -0.849 | 1.456  | 6 | -0.127            | 1.678  | -0.101 |
| 6  | 3.824        | -0.367 | -1.032 | 6 | -1.226            | 0.613  | 0.051  |
| 6  | 4.882        | 0.742  | -1.037 | 6 | 1.207             | 1.254  | 0.490  |
| 6  | 4.990        | 1.123  | 0.436  | 6 | 1.666             | -0.075 | -0.161 |

|           |        |        |        |           |        |        |        |
|-----------|--------|--------|--------|-----------|--------|--------|--------|
| 6         | 3.553  | 1.030  | 0.936  | 6         | -2.431 | 1.398  | -0.560 |
| 6         | 1.867  | -0.781 | 0.320  | 6         | 3.041  | -0.596 | 0.349  |
| 6         | 1.097  | -0.480 | 1.603  | 6         | -0.780 | 2.958  | 0.415  |
| 6         | 4.456  | -1.725 | -0.773 | 6         | -0.799 | -0.647 | -0.701 |
| 6         | -1.026 | -0.174 | 0.378  | 6         | -2.272 | 2.797  | 0.056  |
| 6         | -2.502 | -0.523 | 0.455  | 6         | 2.274  | 2.322  | 0.289  |
| 6         | 1.707  | -1.308 | 2.730  | 6         | 0.540  | -1.119 | -0.160 |
| 6         | -3.317 | 0.061  | -0.699 | 6         | -1.507 | 0.256  | 1.513  |
| 6         | -0.830 | 1.333  | 0.473  | 6         | 4.048  | 0.545  | 0.277  |
| 6         | -4.781 | -0.250 | -0.574 | 6         | 3.619  | 1.867  | 0.836  |
| 6         | -5.341 | -1.355 | -1.218 | 6         | 3.505  | -1.751 | -0.558 |
| 6         | -5.606 | 0.535  | 0.236  | 6         | -3.771 | 0.745  | -0.252 |
| 6         | 0.356  | 3.177  | -0.414 | 6         | 2.957  | -1.058 | 1.817  |
| 6         | -6.688 | -1.665 | -1.063 | 6         | 4.977  | -2.094 | -0.405 |
| 6         | -6.952 | 0.229  | 0.393  | 6         | 5.293  | 0.390  | -0.215 |
| 6         | -7.498 | -0.874 | -0.256 | 6         | 5.863  | -0.894 | -0.633 |
| 6         | 1.339  | 3.453  | -1.518 | 6         | -4.290 | -0.219 | -1.309 |
| 1         | 3.258  | -0.421 | -1.965 | 6         | -5.038 | -1.856 | 0.169  |
| 1         | 5.826  | 0.419  | -1.478 | 6         | -6.251 | -2.514 | 0.737  |
| 1         | 4.514  | 1.584  | -1.631 | 1         | 0.027  | 1.797  | -1.185 |
| 1         | 5.428  | 2.110  | 0.596  | 1         | 1.086  | 1.097  | 1.572  |
| 1         | 5.609  | 0.393  | 0.966  | 1         | 1.800  | 0.168  | -1.232 |
| 1         | 3.018  | 1.983  | 0.815  | 1         | -0.341 | 3.857  | -0.025 |
| 1         | 3.500  | 0.755  | 1.992  | 1         | -0.650 | 3.048  | 1.499  |
| 1         | 1.220  | 0.595  | 1.838  | 1         | -0.691 | -0.415 | -1.767 |
| 1         | -0.601 | -0.524 | -0.568 | 1         | -1.515 | -1.465 | -0.582 |
| 1         | -0.776 | -0.644 | 2.335  | 1         | -2.918 | 2.872  | 0.933  |
| 1         | -2.597 | -1.613 | 0.473  | 1         | -2.623 | 3.559  | -0.649 |
| 1         | -2.905 | -0.153 | 1.407  | 1         | 1.968  | 3.256  | 0.773  |
| 1         | 1.601  | -2.369 | 2.498  | 1         | 2.363  | 2.540  | -0.785 |
| 1         | 2.770  | -1.096 | 2.863  | 1         | -0.615 | -0.163 | 1.988  |
| 1         | 1.197  | -1.106 | 3.676  | 1         | -1.829 | 1.116  | 2.104  |
| 1         | -3.177 | 1.149  | -0.726 | 1         | -2.286 | -0.505 | 1.581  |
| 1         | -2.930 | -0.327 | -1.648 | 1         | 3.533  | 1.768  | 1.929  |
| 1         | 5.216  | -3.166 | -1.698 | 1         | 4.396  | 2.616  | 0.659  |
| 1         | -4.711 | -1.976 | -1.851 | 1         | 3.323  | -1.459 | -1.602 |
| 1         | -5.181 | 1.398  | 0.745  | 1         | 2.886  | -2.629 | -0.371 |
| 1         | 0.767  | 3.388  | 0.580  | 1         | 3.945  | -1.341 | 2.188  |
| 1         | -0.561 | 3.766  | -0.510 | 1         | 2.586  | -0.266 | 2.474  |
| 1         | -7.106 | -2.526 | -1.575 | 1         | 2.293  | -1.917 | 1.912  |
| 1         | -7.578 | 0.854  | 1.023  | 1         | -2.603 | 2.234  | -2.323 |
| 1         | -8.550 | -1.113 | -0.136 | 1         | 5.282  | -2.895 | -1.082 |
| 1         | 0.903  | 3.245  | -2.497 | 1         | 5.184  | -2.460 | 0.610  |
| 1         | 2.232  | 2.832  | -1.410 | 1         | 5.971  | 1.240  | -0.258 |
| 1         | 1.647  | 4.500  | -1.499 | 1         | -3.477 | -0.856 | -1.671 |
|           |        |        |        | 1         | -4.675 | 0.337  | -2.166 |
|           |        |        |        | 1         | -6.967 | -2.768 | -0.044 |
|           |        |        |        | 1         | -6.741 | -1.810 | 1.413  |
|           |        |        |        | 1         | -5.966 | -3.400 | 1.299  |
| Cisapride |        |        |        | Ezetimibe |        |        |        |
| 17        | -8.081 | -1.459 | 0.290  | 9         | 7.314  | -0.707 | -1.770 |
| 9         | 9.862  | -0.488 | -1.643 | 9         | -7.772 | 1.183  | -0.785 |
| 8         | 0.001  | 1.156  | -1.631 | 8         | 2.150  | -2.621 | 2.155  |
| 8         | 5.479  | 0.776  | 1.383  | 8         | -2.792 | -2.703 | -1.072 |
| 8         | -3.086 | -2.317 | -0.856 | 8         | 1.104  | 5.390  | 0.733  |
| 8         | -3.209 | 1.796  | -0.264 | 7         | 2.296  | -0.950 | 0.483  |
| 7         | 1.474  | -0.692 | 1.147  | 6         | 0.363  | -1.059 | 1.264  |
| 7         | -1.812 | -0.502 | -0.405 | 6         | 1.055  | -0.238 | 0.136  |
| 7         | -7.970 | 1.521  | 0.452  | 6         | -0.800 | -1.946 | 0.871  |
| 6         | -0.587 | -1.118 | -0.886 | 6         | 1.713  | -1.736 | 1.460  |
| 6         | 0.479  | -0.023 | -0.997 | 6         | 1.088  | 1.255  | 0.265  |
| 6         | -0.077 | -2.226 | 0.035  | 6         | -2.048 | -1.143 | 0.532  |
| 6         | 0.969  | 0.429  | 0.370  | 6         | 3.570  | -0.891 | -0.086 |
| 6         | 0.414  | -1.676 | 1.358  | 6         | -3.222 | -2.008 | 0.097  |
| 6         | 2.043  | -0.259 | 2.418  | 6         | 0.364  | 2.056  | -0.615 |
| 6         | 3.288  | 0.601  | 2.263  | 6         | 1.813  | 1.878  | 1.285  |
| 6         | -3.013 | -1.134 | -0.538 | 6         | 4.607  | -1.682 | 0.426  |
| 6         | 4.313  | -0.038 | 1.356  | 6         | 3.810  | -0.040 | -1.168 |
| 6         | -0.458 | 0.953  | -2.949 | 6         | -4.462 | -1.183 | -0.153 |
| 6         | -4.246 | -0.338 | -0.249 | 6         | 0.347  | 3.439  | -0.480 |
| 6         | -4.352 | 1.064  | -0.119 | 6         | 1.811  | 3.255  | 1.430  |
| 6         | -5.424 | -1.077 | -0.128 | 6         | 1.072  | 4.042  | 0.546  |
| 6         | 6.528  | 0.398  | 0.605  | 6         | 5.869  | -1.618 | -0.146 |
| 6         | -5.579 | 1.668  | 0.130  | 6         | 5.075  | 0.024  | -1.739 |
| 6         | -6.640 | -0.481 | 0.125  | 6         | -5.431 | -1.037 | 0.839  |
| 6         | -6.751 | 0.911  | 0.261  | 6         | -4.634 | -0.511 | -1.365 |
| 6         | 6.546  | -0.745 | -0.196 | 6         | 6.084  | -0.767 | -1.217 |
| 6         | 7.646  | 1.237  | 0.639  | 6         | -6.551 | -0.238 | 0.639  |
| 6         | -3.286 | 3.207  | -0.211 | 6         | -5.748 | 0.288  | -1.588 |
| 6         | 7.676  | -1.043 | -0.956 | 6         | -6.687 | 0.411  | -0.576 |
| 6         | 8.769  | 0.942  | -0.116 | 1         | 0.105  | -0.421 | 2.119  |
| 6         | 8.767  | -0.198 | -0.906 | 1         | 0.692  | -0.526 | -0.862 |
| 1         | -0.785 | -1.558 | -1.873 | 1         | -1.011 | -2.642 | 1.692  |
| 1         | 1.328  | -0.437 | -1.566 | 1         | -0.519 | -2.566 | 0.012  |

|   |             |        |        |    |            |        |        |
|---|-------------|--------|--------|----|------------|--------|--------|
| 1 | 0.748       | -2.744 | -0.468 | 1  | -2.358     | -0.540 | 1.394  |
| 1 | -0.877      | -2.953 | 0.185  | 1  | -1.836     | -0.430 | -0.277 |
| 1 | 1.761       | 1.168  | 0.220  | 1  | -3.439     | -2.731 | 0.903  |
| 1 | 0.142       | 0.951  | 0.895  | 1  | -0.197     | 1.592  | -1.423 |
| 1 | 0.817       | -2.481 | 1.979  | 1  | 2.400      | 1.272  | 1.971  |
| 1 | -0.432      | -1.230 | 1.919  | 1  | 4.408      | -2.341 | 1.262  |
| 1 | 1.295       | 0.280  | 3.033  | 1  | 3.009      | 0.577  | -1.560 |
| 1 | 2.300       | -1.168 | 2.975  | 1  | -0.223     | 4.051  | -1.174 |
| 1 | -1.821      | 0.507  | -0.336 | 1  | 2.379      | 3.741  | 2.216  |
| 1 | 3.041       | 1.599  | 1.884  | 1  | -3.510     | -3.273 | -1.361 |
| 1 | 3.731       | 0.759  | 3.251  | 1  | 6.685      | -2.222 | 0.232  |
| 1 | 4.555       | -1.057 | 1.696  | 1  | 5.282      | 0.678  | -2.577 |
| 1 | 3.934       | -0.123 | 0.328  | 1  | -5.311     | -1.560 | 1.785  |
| 1 | 0.289       | 0.426  | -3.559 | 1  | -3.886     | -0.629 | -2.144 |
| 1 | -0.633      | 1.938  | -3.382 | 1  | -7.314     | -0.121 | 1.399  |
| 1 | -1.398      | 0.385  | -2.977 | 1  | -5.899     | 0.811  | -2.525 |
| 1 | -5.347      | -2.152 | -0.244 | 1  | 0.561      | 5.814  | 0.062  |
| 1 | -5.655      | 2.745  | 0.215  |    |            |        |        |
| 1 | 5.693       | -1.410 | -0.236 |    |            |        |        |
| 1 | 7.615       | 2.121  | 1.267  |    |            |        |        |
| 1 | -8.705      | 0.923  | 0.803  |    |            |        |        |
| 1 | -7.953      | 2.435  | 0.875  |    |            |        |        |
| 1 | -2.272      | 3.567  | -0.381 |    |            |        |        |
| 1 | -3.634      | 3.553  | 0.769  |    |            |        |        |
| 1 | -3.948      | 3.599  | -0.990 |    |            |        |        |
| 1 | 7.709       | -1.926 | -1.584 |    |            |        |        |
| 1 | 9.643       | 1.583  | -0.099 |    |            |        |        |
|   | Dutasteride |        |        |    | Felodipine |        |        |
| 9 | -3.442      | 3.962  | 1.236  | 17 | -1.985     | -0.789 | -1.544 |
| 9 | -2.645      | 2.345  | 2.436  | 17 | -4.195     | -1.244 | 0.627  |
| 9 | -1.758      | 2.803  | 0.519  | 8  | -0.703     | 2.047  | -1.257 |
| 9 | -7.723      | -0.372 | -1.795 | 8  | 0.571      | -2.525 | -1.072 |
| 9 | -6.011      | -1.504 | -2.490 | 8  | 0.507      | 3.753  | -0.394 |
| 9 | -6.906      | -1.966 | -0.577 | 8  | 2.603      | -3.243 | -0.411 |
| 8 | -2.384      | -2.313 | 0.466  | 7  | 3.393      | 0.803  | 0.613  |
| 8 | 8.635       | 1.818  | -1.001 | 6  | 0.860      | 0.053  | -0.435 |
| 7 | 7.190       | 0.131  | -0.476 | 6  | 1.316      | 1.496  | -0.276 |
| 7 | -2.297      | -0.050 | 0.851  | 6  | 2.005      | -0.924 | -0.213 |
| 6 | 1.957       | -1.556 | 1.112  | 6  | -0.291     | -0.229 | 0.533  |
| 6 | 0.713       | -1.051 | 0.358  | 6  | 2.521      | 1.815  | 0.264  |
| 6 | 3.249       | -1.398 | 0.323  | 6  | 3.191      | -0.531 | 0.324  |
| 6 | 3.434       | 0.101  | -0.012 | 6  | 0.379      | 2.565  | -0.626 |
| 6 | 4.765       | 0.363  | -0.762 | 6  | 3.039      | 3.190  | 0.534  |
| 6 | 0.902       | 0.431  | 0.045  | 6  | 4.358      | -1.408 | 0.640  |
| 6 | -0.371      | -1.388 | 1.422  | 6  | 1.809      | -2.332 | -0.552 |
| 6 | 2.201       | 0.663  | -0.729 | 6  | -1.582     | -0.599 | 0.134  |
| 6 | 1.543       | -2.933 | 1.621  | 6  | -0.044     | -0.084 | 1.899  |
| 6 | 4.450       | -1.969 | 1.073  | 6  | -2.580     | -0.806 | 1.095  |
| 6 | 0.042       | -2.775 | 1.948  | 6  | -1.031     | -0.291 | 2.850  |
| 6 | 5.902       | -0.210 | 0.109  | 6  | -2.308     | -0.652 | 2.449  |
| 6 | 5.761       | -1.700 | 0.349  | 6  | -1.800     | 2.945  | -1.504 |
| 6 | 0.432       | -1.841 | -0.924 | 6  | 0.258      | -3.870 | -1.424 |
| 6 | 4.753       | -0.246 | -2.174 | 6  | -2.722     | 2.981  | -0.309 |
| 6 | 5.060       | 1.836  | -0.915 | 1  | 0.469      | -0.086 | -1.446 |
| 6 | -1.783      | -1.341 | 0.878  | 1  | 4.303      | 1.071  | 0.954  |
| 6 | 6.310       | 2.313  | -0.920 | 1  | 2.993      | 3.815  | -0.357 |
| 6 | 7.494       | 1.435  | -0.794 | 1  | 4.073      | 3.150  | 0.886  |
| 6 | -3.528      | 0.395  | 0.368  | 1  | 2.432      | 3.700  | 1.284  |
| 6 | -3.882      | 1.757  | 0.504  | 1  | 4.744      | -1.892 | -0.258 |
| 6 | -4.434      | -0.467 | -0.258 | 1  | 4.076      | -2.219 | 1.312  |
| 6 | -5.646      | 0.022  | -0.730 | 1  | 5.162      | -0.828 | 1.100  |
| 6 | -5.100      | 2.219  | 0.023  | 1  | 0.957      | 0.205  | 2.209  |
| 6 | -2.952      | 2.722  | 1.167  | 1  | -0.812     | -0.170 | 3.906  |
| 6 | -5.994      | 1.360  | -0.599 | 1  | -3.101     | -0.817 | 3.168  |
| 6 | -6.576      | -0.950 | -1.398 | 1  | -1.403     | 3.935  | -1.740 |
| 1 | 2.053       | -0.901 | 1.996  | 1  | -2.295     | 2.537  | -2.387 |
| 1 | 3.150       | -1.958 | -0.620 | 1  | 0.329      | -4.525 | -0.553 |
| 1 | 3.515       | 0.624  | 0.958  | 1  | 0.941      | -4.239 | -2.193 |
| 1 | 0.937       | 0.997  | 0.989  | 1  | -0.763     | -3.846 | -1.800 |
| 1 | 0.056       | 0.828  | -0.529 | 1  | -3.569     | 3.644  | -0.502 |
| 1 | -0.276      | -0.639 | 2.221  | 1  | -3.114     | 1.985  | -0.088 |
| 1 | 2.115       | 0.205  | -1.722 | 1  | -2.197     | 3.352  | 0.574  |
| 1 | 2.321       | 1.735  | -0.908 |    |            |        |        |
| 1 | 2.128       | -3.252 | 2.487  |    |            |        |        |
| 1 | 1.700       | -3.692 | 0.845  |    |            |        |        |
| 1 | 4.313       | -3.044 | 1.231  |    |            |        |        |
| 1 | 4.491       | -1.517 | 2.075  |    |            |        |        |
| 1 | -0.566      | -3.541 | 1.463  |    |            |        |        |
| 1 | -0.155      | -2.856 | 3.020  |    |            |        |        |
| 1 | 5.808       | 0.291  | 1.091  |    |            |        |        |
| 1 | 6.609       | -2.062 | 0.942  |    |            |        |        |
| 1 | 5.798       | -2.240 | -0.605 |    |            |        |        |
| 1 | -0.437      | -1.426 | -1.446 |    |            |        |        |
| 1 | 1.271       | -1.809 | -1.622 |    |            |        |        |

|    |              |        |        |    |             |        |        |
|----|--------------|--------|--------|----|-------------|--------|--------|
| 1  | 0.207        | -2.890 | -0.723 |    |             |        |        |
| 1  | 4.099        | 0.324  | -2.838 |    |             |        |        |
| 1  | 5.757        | -0.226 | -2.604 |    |             |        |        |
| 1  | 4.405        | -1.282 | -2.178 |    |             |        |        |
| 1  | 4.227        | 2.513  | -1.096 |    |             |        |        |
| 1  | 7.990        | -0.439 | -0.233 |    |             |        |        |
| 1  | 6.527        | 3.364  | -1.079 |    |             |        |        |
| 1  | -1.691       | 0.650  | 1.253  |    |             |        |        |
| 1  | -4.179       | -1.511 | -0.363 |    |             |        |        |
| 1  | -5.347       | 3.267  | 0.140  |    |             |        |        |
| 1  | -6.943       | 1.723  | -0.972 |    |             |        |        |
|    | Aripiprazole |        |        |    | Clindamycin |        |        |
| 17 | 6.666        | -1.830 | -0.531 | 17 | 0.835       | 2.997  | -0.832 |
| 17 | 9.654        | -0.845 | -0.451 | 16 | 4.774       | 0.920  | -1.195 |
| 8  | -4.236       | -0.674 | 0.047  | 8  | 3.083       | 0.452  | 0.912  |
| -8 | 11.163       | -1.569 | 0.006  | 8  | 1.558       | -2.019 | 1.178  |
| 7  | 1.898        | -0.287 | 0.608  | 8  | 3.076       | -3.355 | -0.685 |
| 7  | 4.646        | 0.286  | 0.071  | 8  | 5.513       | -1.897 | -0.537 |
| 7  | -8.950       | -1.160 | -0.250 | 8  | -1.496      | -0.227 | 2.116  |
| 6  | 2.948        | -1.263 | 0.874  | 7  | -3.088      | -1.908 | 0.243  |
| 6  | 2.304        | 0.577  | -0.494 | 7  | -0.481      | 0.340  | 0.161  |
| 6  | 4.254        | -0.573 | 1.193  | 6  | -5.167      | -0.800 | 0.160  |
| 6  | 3.611        | 1.277  | -0.180 | 6  | -2.756      | -0.503 | 0.077  |
| 6  | 0.634        | -0.961 | 0.344  | 6  | -4.040      | 0.203  | 0.509  |
| 6  | -0.561       | -0.025 | 0.278  | 6  | -4.406      | -2.025 | -0.355 |
| 6  | 5.975        | 0.737  | 0.073  | 6  | 1.954       | 0.132  | 0.086  |
| 6  | -1.874       | -0.791 | 0.206  | 6  | 0.751       | 0.774  | 0.773  |
| 6  | -3.065       | 0.130  | 0.097  | 6  | 1.856       | -1.375 | -0.060 |
| 6  | 7.027        | -0.175 | -0.164 | 6  | -6.185      | -0.269 | -0.839 |
| 6  | 6.306        | 2.085  | 0.252  | 6  | 3.149       | -1.949 | -0.643 |
| 6  | -8.010       | 1.061  | -0.272 | 6  | -1.538      | -0.122 | 0.905  |
| 6  | -9.408       | 1.573  | -0.452 | 6  | 4.362       | -1.468 | 0.152  |
| 6  | -7.823       | -0.330 | -0.197 | 6  | 4.328       | 0.053  | 0.360  |
| 6  | -5.435       | -0.041 | -0.054 | 6  | 0.860       | 2.293  | 0.863  |
| 6  | 8.352        | 0.266  | -0.167 | 6  | -2.096      | -2.811 | -0.293 |
| 6  | 7.626        | 2.514  | 0.221  | 6  | -7.064      | 0.845  | -0.290 |
| -6 | 10.406       | 0.705  | 0.305  | 6  | -0.239      | 2.929  | 1.674  |
| 6  | -6.552       | -0.878 | -0.091 | 6  | -8.057      | 1.376  | -1.309 |
| 6  | 8.657        | 1.610  | 0.026  | 6  | 4.636       | 2.608  | -0.558 |
| 6  | -6.884       | 1.868  | -0.218 | 6  | -5.693      | -1.073 | 1.082  |
| 6  | -5.597       | 1.343  | -0.111 | 1  | -2.550      | -0.285 | -0.997 |
| -6 | 10.250       | -0.767 | 0.004  | 1  | -4.163      | 1.163  | -0.002 |
| 1  | 2.639        | -1.881 | 1.723  | 1  | -3.995      | 0.399  | 1.583  |
| 1  | 3.101        | -1.939 | 0.009  | 1  | -4.347      | -1.993 | -1.465 |
| 1  | 2.417        | 0.000  | -1.434 | 1  | -4.870      | -2.979 | -0.083 |
| 1  | 1.532        | 1.332  | -0.662 | 1  | 2.106       | 0.574  | -0.911 |
| 1  | 4.138        | 0.036  | 2.107  | 1  | 0.703       | 0.408  | 1.807  |
| 1  | 5.033        | -1.311 | 1.380  | 1  | 1.028       | -1.636 | -0.727 |
| 1  | 3.913        | 1.897  | -1.028 | 1  | -6.822      | -1.095 | -1.184 |
| 1  | 3.461        | 1.943  | 0.690  | 1  | -5.654      | 0.087  | -1.736 |
| 1  | 0.687        | -1.562 | -0.588 | 1  | 3.268       | -1.605 | -1.678 |
| 1  | 0.477        | -1.680 | 1.158  | 1  | 4.314       | -1.925 | 1.157  |
| 1  | -0.548       | 0.629  | 1.158  | 1  | -0.621      | 0.525  | -0.823 |
| 1  | -0.482       | 0.634  | -0.595 | 1  | 5.059       | 0.355  | 1.120  |
| 1  | -1.871       | -1.470 | -0.654 | 1  | 1.849       | 2.551  | 1.248  |
| 1  | -1.993       | -1.423 | 1.094  | 1  | -1.156      | -2.705 | 0.255  |
| 1  | -3.000       | 0.753  | -0.808 | 1  | -1.898      | -2.636 | -1.369 |
| 1  | -3.116       | 0.812  | 0.960  | 1  | -2.433      | -3.844 | -0.177 |
| 1  | 5.514        | 2.801  | 0.436  | 1  | -7.599      | 0.475  | 0.594  |
| 1  | -9.483       | 2.615  | -0.132 | 1  | -6.433      | 1.666  | 0.074  |
| 1  | -9.666       | 1.565  | -1.521 | 1  | -0.221      | 2.527  | 2.691  |
| -1 | 11.441       | 0.979  | 0.100  | 1  | -0.118      | 4.012  | 1.722  |
| -1 | 10.256       | 0.820  | 1.387  | 1  | -1.221      | 2.711  | 1.248  |
| 1  | 7.855        | 3.564  | 0.368  | 1  | 2.054       | -1.567 | 1.872  |
| 1  | -6.407       | -1.952 | -0.029 | 1  | 2.661       | -3.621 | 0.145  |
| 1  | -7.011       | 2.946  | -0.271 | 1  | -7.545      | 1.783  | -2.187 |
| 1  | 9.693        | 1.925  | 0.010  | 1  | -8.682      | 2.171  | -0.896 |
| 1  | -4.745       | 2.010  | -0.073 | 1  | -8.724      | 0.584  | -1.664 |
| 1  | -8.816       | -2.157 | -0.347 | 1  | 6.292       | -1.578 | -0.071 |
|    |              |        |        | 1  | 4.985       | 3.276  | -1.345 |
|    |              |        |        | 1  | 5.268       | 2.743  | 0.323  |
|    |              |        |        | 1  | 3.603       | 2.862  | -0.320 |
|    | Bisoprolol   |        |        |    | Clofazimine |        |        |
| 8  | 2.747        | -0.859 | 0.864  | 17 | -6.896      | -2.380 | 0.209  |
| 8  | 5.207        | -1.298 | 2.223  | 17 | 8.558       | 0.654  | 0.294  |
| 8  | -3.253       | -0.913 | -0.964 | 7  | -2.156      | 1.178  | -0.055 |
| 8  | -5.502       | 0.268  | 0.393  | 7  | 0.124       | 2.798  | -0.185 |
| 7  | 5.103        | 1.215  | -0.504 | 7  | 2.923       | -1.101 | -0.215 |
| 6  | 5.098        | 0.722  | 0.865  | 7  | 0.850       | -2.639 | -0.228 |
| 6  | 5.127        | -0.803 | 0.895  | 6  | -0.908      | 0.583  | -0.120 |
| 6  | 4.413        | 2.494  | -0.715 | 6  | 0.241       | 1.486  | -0.162 |
| 6  | 3.903        | -1.405 | 0.247  | 6  | -2.305      | 2.561  | -0.066 |
| 6  | 4.845        | 3.059  | -2.055 | 6  | -0.738      | -0.776 | -0.154 |
| 6  | 2.908        | 2.280  | -0.670 | 6  | 0.564       | -1.371 | -0.187 |

|    |                  |        |        |   |             |        |        |
|----|------------------|--------|--------|---|-------------|--------|--------|
| 6  | 1.536            | -1.196 | 0.348  | 6 | -1.127      | 3.346  | -0.144 |
| 6  | -1.056           | -1.742 | -0.579 | 6 | 1.729       | -0.448 | -0.180 |
| 6  | -2.442           | -2.067 | -1.041 | 6 | 1.539       | 0.908  | -0.192 |
| 6  | -5.896           | 1.588  | 0.762  | 6 | -3.314      | 0.336  | 0.011  |
| 6  | 0.426            | -0.598 | 0.955  | 6 | -3.560      | 3.177  | 0.004  |
| 6  | 1.347            | -2.067 | -0.725 | 6 | -0.223      | -3.620 | -0.232 |
| 6  | -4.604           | -1.183 | -1.252 | 6 | -1.257      | 4.746  | -0.166 |
| 6  | -5.421           | 0.053  | -0.997 | 6 | -4.021      | 0.041  | -1.149 |
| 6  | -0.850           | -0.872 | 0.498  | 6 | -3.705      | -0.203 | 1.232  |
| 6  | 0.055            | -2.323 | -1.178 | 6 | -3.650      | 4.559  | -0.017 |
| 6  | -5.678           | 1.691  | 2.254  | 6 | -2.498      | 5.348  | -0.106 |
| 6  | -7.334           | 1.884  | 0.368  | 6 | 4.227       | -0.630 | -0.091 |
| 1  | 5.939            | 1.109  | 1.468  | 6 | 0.306       | -4.920 | -0.818 |
| 1  | 4.185            | 1.051  | 1.367  | 6 | -0.750      | -3.831 | 1.186  |
| 1  | 5.991            | -1.154 | 0.302  | 6 | -5.130      | -0.793 | -1.093 |
| 1  | 4.686            | 3.222  | 0.074  | 6 | -4.809      | -1.041 | 1.298  |
| 1  | 6.059            | 1.296  | -0.833 | 6 | -5.513      | -1.329 | 0.133  |
| 1  | 3.915            | -2.497 | 0.361  | 6 | 5.255       | -1.389 | -0.667 |
| 1  | 3.914            | -1.152 | -0.821 | 6 | 4.566       | 0.522  | 0.629  |
| 1  | 4.599            | 2.361  | -2.861 | 6 | 6.580       | -1.005 | -0.547 |
| 1  | 4.341            | 4.005  | -2.263 | 6 | 5.893       | 0.914  | 0.745  |
| 1  | 5.923            | 3.245  | -2.087 | 6 | 6.894       | 0.154  | 0.153  |
| 1  | 2.580            | 1.843  | 0.275  | 1 | -1.602      | -1.426 | -0.149 |
| 1  | 2.598            | 1.599  | -1.469 | 1 | 2.364       | 1.604  | -0.258 |
| 1  | 2.377            | 3.227  | -0.800 | 1 | -4.457      | 2.572  | 0.076  |
| 1  | 5.921            | -0.835 | 2.670  | 1 | -1.059      | -3.275 | -0.864 |
| 1  | -2.421           | -2.461 | -2.072 | 1 | -0.343      | 5.326  | -0.229 |
| 1  | -2.887           | -2.861 | -0.414 | 1 | 2.779       | -2.105 | -0.329 |
| 1  | -5.229           | 2.299  | 0.242  | 1 | -3.700      | 0.467  | -2.095 |
| 1  | 0.593            | 0.080  | 1.785  | 1 | -3.136      | 0.031  | 2.126  |
| 1  | 2.190            | -2.539 | -1.214 | 1 | -4.627      | 5.027  | 0.038  |
| 1  | -4.947           | 0.916  | -1.493 | 1 | -2.581      | 6.429  | -0.123 |
| 1  | -6.420           | -0.078 | -1.443 | 1 | 0.681       | -4.769 | -1.833 |
| 1  | -4.723           | -1.494 | -2.304 | 1 | -0.476      | -5.684 | -0.853 |
| 1  | -4.973           | -2.009 | -0.622 | 1 | 1.131       | -5.303 | -0.211 |
| 1  | -1.709           | -0.399 | 0.964  | 1 | -1.547      | -4.580 | 1.199  |
| 1  | -0.083           | -2.994 | -2.022 | 1 | -1.145      | -2.905 | 1.611  |
| 1  | -6.323           | 0.985  | 2.783  | 1 | 0.055       | -4.181 | 1.839  |
| 1  | -4.642           | 1.461  | 2.511  | 1 | -5.693      | -1.031 | -1.987 |
| 1  | -5.909           | 2.697  | 2.612  | 1 | -5.126      | -1.469 | 2.242  |
| 1  | -8.013           | 1.164  | 0.834  | 1 | 5.003       | -2.288 | -1.221 |
| 1  | -7.482           | 1.842  | -0.713 | 1 | 3.801       | 1.094  | 1.137  |
| 1  | -7.623           | 2.885  | 0.698  | 1 | 7.367       | -1.596 | -1.000 |
|    |                  |        |        | 1 | 6.151       | 1.803  | 1.308  |
|    | Chlorotrianisene |        |        |   | Doxycycline |        |        |
| 17 | -0.675           | -2.951 | -0.629 | 8 | 0.341       | -2.812 | -0.530 |
| 8  | -6.368           | -0.179 | -0.148 | 8 | 1.761       | 0.723  | 2.372  |
| 8  | 1.547            | 4.873  | 0.260  | 8 | -0.267      | 2.272  | 1.503  |
| 8  | 5.615            | -1.596 | 0.725  | 8 | 1.987       | 2.676  | 0.224  |
| 6  | -0.722           | -0.291 | -0.114 | 8 | -2.716      | 2.206  | 1.019  |
| 6  | -2.199           | -0.316 | -0.114 | 8 | 3.089       | -1.227 | -2.126 |
| 6  | -0.101           | 1.053  | -0.046 | 8 | -5.212      | 2.091  | 0.711  |
| 6  | 0.057            | -1.400 | -0.200 | 8 | 4.727       | 1.205  | -2.247 |
| 6  | 1.507            | -1.486 | 0.017  | 7 | 3.774       | -1.065 | 1.159  |
| 6  | -2.920           | 0.602  | -0.893 | 7 | 3.123       | 2.807  | -2.328 |
| 6  | -0.583           | 2.015  | 0.856  | 6 | 1.306       | -0.992 | 0.772  |
| 6  | -2.928           | -1.192 | 0.693  | 6 | -1.195      | -1.148 | 0.386  |
| 6  | 0.949            | 1.426  | -0.889 | 6 | 0.197       | -1.444 | -0.187 |
| 6  | -4.302           | 0.621  | -0.895 | 6 | 1.235       | 0.512  | 1.059  |
| 6  | -0.014           | 3.272  | 0.942  | 6 | 2.688       | -1.400 | 0.239  |
| 6  | -4.318           | -1.177 | 0.717  | 6 | -2.305      | -1.736 | -0.512 |
| 6  | 1.527            | 2.688  | -0.823 | 6 | -1.322      | 0.323  | 0.678  |
| 6  | 2.112            | -0.785 | 1.075  | 6 | -0.197      | 1.072  | 1.082  |
| 6  | 2.330            | -2.268 | -0.797 | 6 | 2.042       | 1.341  | 0.048  |
| 6  | -5.013           | -0.273 | -0.088 | 6 | -3.577      | -0.919 | -0.607 |
| 6  | 1.051            | 3.617  | 0.105  | 6 | 2.887       | -0.653 | -1.077 |
| 6  | 3.475            | -0.840 | 1.286  | 6 | -2.570      | 0.959  | 0.631  |
| 6  | 3.705            | -2.327 | -0.602 | 6 | 2.787       | 0.814  | -0.955 |
| 6  | 4.286            | -1.607 | 0.442  | 6 | -3.740      | 0.319  | 0.057  |
| 6  | -7.116           | -1.069 | 0.654  | 6 | -2.658      | -3.150 | -0.029 |
| 6  | 2.632            | 5.249  | -0.563 | 6 | -4.621      | -1.427 | -1.374 |
| 6  | 6.461            | -2.369 | -0.101 | 6 | 3.686       | -1.811 | 2.399  |
| 1  | -2.378           | 1.310  | -1.514 | 6 | 5.067       | -1.279 | 0.523  |
| 1  | -1.415           | 1.760  | 1.506  | 6 | -5.010      | 0.953  | 0.013  |
| 1  | -2.400           | -1.896 | 1.327  | 6 | 3.641       | 1.620  | -1.886 |
| 1  | 1.326            | 0.710  | -1.613 | 6 | -5.840      | -0.768 | -1.448 |
| 1  | -4.856           | 1.321  | -1.509 | 6 | -6.045      | 0.401  | -0.737 |
| 1  | -0.379           | 4.009  | 1.649  | 1 | 1.120       | -1.487 | 1.736  |
| 1  | -4.846           | -1.865 | 1.365  | 1 | -1.254      | -1.680 | 1.353  |
| 1  | 2.335            | 2.940  | -1.499 | 1 | 0.291       | -0.912 | -1.146 |
| 1  | 1.494            | -0.190 | 1.739  | 1 | 2.684       | -2.477 | -0.004 |
| 1  | 1.885            | -2.841 | -1.604 | 1 | -1.902      | -1.824 | -1.531 |
| 1  | 3.937            | -0.306 | 2.108  | 1 | -3.115      | -3.107 | 0.964  |
| 1  | 4.309            | -2.940 | -1.261 | 1 | -1.762      | -3.765 | 0.026  |

|    |                |        |        |    |                     |        |        |
|----|----------------|--------|--------|----|---------------------|--------|--------|
| 1  | -6.907         | -0.925 | 1.720  | 1  | -3.361              | -3.652 | -0.694 |
| 1  | -6.917         | -2.115 | 0.390  | 1  | 0.518               | -3.306 | 0.277  |
| 1  | -8.164         | -0.845 | 0.461  | 1  | 1.456               | 1.591  | 2.665  |
| 1  | 2.359          | 5.228  | -1.625 | 1  | -4.479              | -2.352 | -1.922 |
| 1  | 2.889          | 6.268  | -0.279 | 1  | 2.797               | -1.526 | 2.963  |
| 1  | 3.501          | 4.599  | -0.406 | 1  | 3.678               | -2.908 | 2.243  |
| 1  | 6.203          | -3.434 | -0.059 | 1  | 4.552               | -1.571 | 3.020  |
| 1  | 7.470          | -2.229 | 0.282  | 1  | 5.214               | -2.322 | 0.189  |
| 1  | 6.421          | -2.034 | -1.145 | 1  | 5.184               | -0.627 | -0.347 |
|    |                |        |        | 1  | 5.858               | -1.034 | 1.235  |
|    |                |        |        | 1  | 1.229               | 2.878  | 0.813  |
|    |                |        |        | 1  | -1.818              | 2.518  | 1.327  |
|    |                |        |        | 1  | -6.643              | -1.177 | -2.053 |
|    |                |        |        | 1  | -7.006              | 0.908  | -0.765 |
|    |                |        |        | 1  | 2.411               | 3.260  | -1.774 |
|    |                |        |        | 1  | 3.779               | 3.411  | -2.801 |
|    |                |        |        | 1  | -6.120              | 2.376  | 0.564  |
|    | Chlorothiazide |        |        |    | Bendroflumethiazide |        |        |
| 17 | 2.641          | 2.205  | 0.083  | 16 | -0.783              | 2.896  | -0.113 |
| 16 | -2.778         | -0.962 | 0.090  | 16 | 3.906               | 0.322  | 0.585  |
| 16 | 2.669          | -1.076 | -0.175 | 9  | 1.479               | -3.312 | -0.825 |
| 8  | -3.026         | -1.225 | 1.495  | 9  | 3.127               | -2.289 | -1.763 |
| 8  | -2.773         | -2.040 | -0.871 | 9  | 3.107               | -2.588 | 0.388  |
| 8  | 2.248          | -2.462 | -0.113 | 8  | -0.105              | 3.950  | -0.837 |
| 8  | 3.467          | -0.549 | -1.263 | 8  | -1.134              | 3.053  | 1.283  |
| 7  | -2.439         | 2.009  | -0.017 | 8  | 4.736               | -0.411 | -0.349 |
| 7  | -3.912         | 0.172  | -0.388 | 8  | 4.126               | 1.725  | 0.881  |
| 7  | 3.433          | -0.712 | 1.272  | 7  | -2.189              | 2.561  | -0.984 |
| 6  | -1.239         | -0.082 | -0.034 | 7  | -1.770              | 0.229  | -1.341 |
| 6  | -1.237         | 1.315  | 0.016  | 7  | 3.875               | -0.456 | 2.074  |
| 6  | 1.169          | -0.099 | -0.060 | 6  | -2.736              | 1.217  | -0.852 |
| 6  | -0.039         | -0.779 | -0.089 | 6  | 0.120               | 1.367  | -0.289 |
| 6  | -0.023         | 2.004  | 0.049  | 6  | -0.486              | 0.226  | -0.846 |
| 6  | 1.169          | 1.301  | 0.018  | 6  | -3.224              | 0.912  | 0.571  |
| 6  | -3.639         | 1.421  | -0.308 | 6  | 1.442               | 1.338  | 0.133  |
| 1  | -0.037         | -1.863 | -0.147 | 6  | 0.297               | -0.937 | -0.935 |
| 1  | -0.006         | 3.088  | 0.090  | 6  | 2.202               | 0.183  | 0.032  |
| 1  | -2.398         | 3.017  | -0.036 | 6  | 1.611               | -0.976 | -0.508 |
| 1  | -4.440         | 2.135  | -0.507 | 6  | -3.893              | -0.432 | 0.624  |
| 1  | 3.563          | -1.558 | 1.817  | 6  | 2.343               | -2.286 | -0.681 |
| 1  | 4.315          | -0.241 | 1.100  | 6  | -5.225              | -0.584 | 0.234  |
|    |                |        |        | 6  | -3.175              | -1.570 | 1.005  |
|    |                |        |        | 6  | -5.827              | -1.838 | 0.229  |
|    |                |        |        | 6  | -3.773              | -2.826 | 0.999  |
|    |                |        |        | 6  | -5.102              | -2.962 | 0.609  |
|    |                |        |        | 1  | -3.596              | 1.170  | -1.530 |
|    |                |        |        | 1  | -2.008              | 2.794  | -1.957 |
|    |                |        |        | 1  | -2.162              | -0.692 | -1.488 |
|    |                |        |        | 1  | -3.906              | 1.713  | 0.870  |
|    |                |        |        | 1  | -2.380              | 0.947  | 1.265  |
|    |                |        |        | 1  | 1.902               | 2.233  | 0.539  |
|    |                |        |        | 1  | -0.152              | -1.834 | -1.347 |
|    |                |        |        | 1  | -5.799              | 0.292  | -0.057 |
|    |                |        |        | 1  | -2.140              | -1.463 | 1.322  |
|    |                |        |        | 1  | 4.321               | -1.365 | 2.013  |
|    |                |        |        | 1  | 4.339               | 0.135  | 2.757  |
|    |                |        |        | 1  | -6.867              | -1.936 | -0.068 |
|    |                |        |        | 1  | -3.203              | -3.697 | 1.305  |
|    |                |        |        | 1  | -5.572              | -3.940 | 0.608  |
|    | Ciprofloxacin  |        |        |    | Entecavir           |        |        |
| 9  | -2.104         | -2.790 | -0.505 | 8  | -2.795              | 2.691  | -0.230 |
| 8  | 2.859          | -2.624 | -0.295 | 8  | -4.620              | -1.681 | 0.407  |
| 8  | 5.379          | -1.628 | 0.048  | 8  | 4.501               | -1.960 | -0.459 |
| 8  | 5.591          | 0.586  | 0.320  | 7  | 0.187               | -0.388 | 0.002  |
| 7  | 1.574          | 1.244  | 0.228  | 7  | 1.381               | -2.244 | -0.436 |
| 7  | -3.070         | -0.231 | -0.088 | 7  | 1.951               | 1.231  | 0.309  |
| 7  | -5.749         | 0.538  | 0.404  | 7  | 4.070               | 0.235  | 0.037  |
| 6  | 1.148          | 2.607  | 0.443  | 7  | 3.868               | 2.525  | 0.453  |
| 6  | 1.898          | 3.715  | -0.220 | 6  | -0.950              | 0.512  | 0.121  |
| 6  | 0.522          | 3.358  | -0.693 | 6  | -3.403              | 0.346  | 0.144  |
| 6  | 0.624          | 0.224  | 0.074  | 6  | -2.930              | 1.418  | -0.853 |
| 6  | 2.888          | 0.933  | 0.262  | 6  | -1.525              | 0.976  | -1.221 |
| 6  | 1.078          | -1.093 | -0.102 | 6  | -2.138              | -0.079 | 0.858  |
| 6  | -0.745         | 0.510  | 0.116  | 6  | -4.079              | -0.818 | -0.573 |
| 6  | -1.702         | -0.493 | -0.054 | 6  | 1.504               | -0.019 | 0.046  |
| 6  | -3.919         | -0.980 | 0.851  | 6  | -2.063              | -0.866 | 1.927  |
| 6  | -3.480         | 1.164  | -0.183 | 6  | 0.185               | -1.736 | -0.302 |
| 6  | 3.405          | -0.325 | 0.100  | 6  | 2.225               | -1.181 | -0.220 |
| 6  | 2.511          | -1.462 | -0.118 | 6  | 3.656               | -1.117 | -0.245 |
| 6  | -5.372         | -0.869 | 0.442  | 6  | 3.257               | 1.304  | 0.284  |
| 6  | -4.942         | 1.245  | -0.579 | 1  | -0.579              | 1.388  | 0.665  |
| 6  | 0.121          | -2.100 | -0.275 | 1  | -4.141              | 0.761  | 0.842  |
| 6  | -1.214         | -1.802 | -0.264 | 1  | -3.594              | 1.487  | -1.728 |
| 6  | 4.877          | -0.387 | 0.167  | 1  | -0.943              | 1.775  | -1.685 |

|             |        |        |        |               |        |        |        |
|-------------|--------|--------|--------|---------------|--------|--------|--------|
| 1           | 0.754  | 2.787  | 1.440  | 1             | -1.568 | 0.135  | -1.921 |
| 1           | 2.729  | 3.449  | -0.862 | 1             | -4.868 | -0.427 | -1.235 |
| 1           | 2.042  | 4.628  | 0.343  | 1             | -3.349 | -1.345 | -1.208 |
| 1           | -0.305 | 4.021  | -0.470 | 1             | -1.104 | -1.160 | 2.343  |
| 1           | 0.442  | 2.833  | -1.638 | 1             | -2.954 | -1.254 | 2.404  |
| 1           | 3.567  | 1.763  | 0.426  | 1             | -3.648 | 2.942  | 0.134  |
| 1           | -1.072 | 1.523  | 0.299  | 1             | -0.745 | -2.283 | -0.383 |
| 1           | -3.794 | -0.568 | 1.867  | 1             | -4.916 | -2.486 | -0.024 |
| 1           | -3.608 | -2.022 | 0.867  | 1             | 5.071  | 0.372  | -0.028 |
| 1           | -2.865 | 1.658  | -0.942 | 1             | 3.239  | 3.223  | 0.821  |
| 1           | -3.330 | 1.694  | 0.775  | 1             | 4.768  | 2.522  | 0.911  |
| 1           | -5.504 | -1.373 | -0.533 |               |        |        |        |
| 1           | -5.995 | -1.389 | 1.175  |               |        |        |        |
| 1           | -5.250 | 2.294  | -0.611 |               |        |        |        |
| 1           | -5.051 | 0.831  | -1.598 |               |        |        |        |
| 1           | 0.466  | -3.114 | -0.445 |               |        |        |        |
| 1           | -6.732 | 0.626  | 0.170  |               |        |        |        |
| 1           | 6.339  | -1.519 | 0.111  |               |        |        |        |
| Clorazepate |        |        |        | Acamprosate   |        |        |        |
| 17          | 3.942  | -2.247 | -1.171 | 16            | -2.265 | -0.190 | 0.172  |
| 8           | -3.516 | -1.038 | 1.569  | 8             | -2.922 | -1.149 | -0.990 |
| 8           | -4.200 | -1.045 | -1.427 | 8             | -3.117 | 0.978  | 0.294  |
| 8           | -4.080 | 1.171  | -1.026 | 8             | -1.957 | -1.023 | 1.307  |
| 7           | -1.299 | -1.521 | 1.493  | 8             | 3.078  | 0.179  | 1.309  |
| 7           | -1.429 | 0.871  | -0.195 | 7             | 2.269  | 0.353  | -0.794 |
| 6           | 0.503  | -0.603 | 0.103  | 6             | 0.137  | 1.119  | 0.226  |
| 6           | -0.167 | 0.714  | -0.001 | 6             | -0.741 | 0.252  | -0.657 |
| 6           | -0.067 | -1.659 | 0.842  | 6             | 1.438  | 1.499  | -0.473 |
| 6           | -2.250 | -0.293 | -0.375 | 6             | 3.065  | -0.225 | 0.159  |
| 6           | 0.654  | 1.942  | 0.124  | 6             | 3.907  | -1.383 | -0.310 |
| 6           | -2.465 | -0.978 | 0.978  | 1             | -0.400 | 2.031  | 0.503  |
| 6           | 1.745  | -0.808 | -0.513 | 1             | 0.375  | 0.591  | 1.154  |
| 6           | 0.639  | -2.859 | 0.990  | 1             | -1.037 | 0.759  | -1.580 |
| 6           | 2.410  | -2.014 | -0.380 | 1             | -0.258 | -0.695 | -0.913 |
| 6           | 1.871  | -3.042 | 0.391  | 1             | 1.236  | 2.044  | -1.401 |
| 6           | 1.856  | 1.958  | 0.842  | 1             | 2.011  | 2.160  | 0.183  |
| 6           | 0.195  | 3.134  | -0.451 | 1             | 2.323  | 0.029  | -1.746 |
| 6           | -3.601 | 0.075  | -0.964 | 1             | -3.776 | -0.764 | -1.229 |
| 6           | 2.583  | 3.135  | 0.977  | 1             | 4.956  | -1.165 | -0.107 |
| 6           | 0.927  | 4.304  | -0.323 | 1             | 3.648  | -2.269 | 0.272  |
| 6           | 2.124  | 4.309  | 0.390  | 1             | 3.793  | -1.614 | -1.371 |
| 1           | -1.782 | -1.044 | -1.036 |               |        |        |        |
| 1           | -1.457 | -2.099 | 2.309  |               |        |        |        |
| 1           | 2.189  | -0.007 | -1.093 |               |        |        |        |
| 1           | 0.201  | -3.660 | 1.577  |               |        |        |        |
| 1           | 2.408  | -3.977 | 0.504  |               |        |        |        |
| 1           | 2.215  | 1.049  | 1.316  |               |        |        |        |
| 1           | -0.745 | 3.116  | -0.992 |               |        |        |        |
| 1           | 3.507  | 3.134  | 1.546  |               |        |        |        |
| 1           | 0.565  | 5.218  | -0.781 |               |        |        |        |
| 1           | 2.695  | 5.226  | 0.490  |               |        |        |        |
| 1           | -5.080 | -0.786 | -1.733 |               |        |        |        |
| Cefaclor    |        |        |        | Emtricitabine |        |        |        |
| 17          | 4.489  | 1.984  | -0.460 | 16            | 3.250  | -0.820 | 0.639  |
| 16          | 0.288  | 1.071  | -1.123 | 9             | -2.536 | 2.408  | 0.277  |
| 8           | 1.092  | -2.049 | 1.739  | 8             | 1.433  | -0.075 | -1.149 |
| 8           | -2.585 | -2.623 | -1.360 | 8             | 2.305  | 2.136  | 0.480  |
| 8           | 3.958  | -2.175 | 0.731  | 8             | -1.281 | -2.759 | -0.205 |
| 8           | 4.847  | -0.247 | 1.489  | 7             | -0.601 | -0.577 | -0.178 |
| 7           | 1.832  | -0.976 | -0.253 | 7             | -2.913 | -1.155 | -0.117 |
| 7           | -1.417 | -1.209 | -0.021 | 7             | -4.490 | 0.501  | 0.131  |
| 7           | -4.913 | -1.350 | -0.931 | 6             | 0.788  | -0.994 | -0.287 |
| 6           | 0.792  | -0.678 | -1.223 | 6             | 1.498  | -0.976 | 1.059  |
| 6           | -0.135 | -1.654 | -0.450 | 6             | 2.792  | 0.164  | -0.862 |
| 6           | 0.976  | -1.675 | 0.609  | 6             | 2.993  | 1.654  | -0.655 |
| 6           | 2.970  | -0.199 | -0.006 | 6             | -0.886 | 0.743  | 0.001  |
| 6           | 1.982  | 1.696  | -1.368 | 6             | -1.621 | -1.591 | -0.167 |
| 6           | 3.048  | 1.035  | -0.551 | 6             | -2.177 | 1.114  | 0.119  |
| 6           | -2.572 | -1.731 | -0.532 | 6             | -3.194 | 0.121  | 0.031  |
| 6           | -3.870 | -1.157 | 0.060  | 1             | 0.771  | -2.003 | -0.711 |
| 6           | 4.031  | -0.830 | 0.824  | 1             | 1.150  | -0.133 | 1.664  |
| 6           | -3.738 | 0.293  | 0.472  | 1             | 1.327  | -1.905 | 1.603  |
| 6           | -3.417 | 0.630  | 1.788  | 1             | 3.417  | -0.199 | -1.687 |
| 6           | -3.865 | 1.310  | -0.477 | 1             | 2.582  | 2.187  | -1.517 |
| 6           | -3.214 | 1.959  | 2.151  | 1             | 4.070  | 1.873  | -0.605 |
| 6           | -3.666 | 2.636  | -0.114 | 1             | -0.051 | 1.437  | 0.025  |
| 6           | -3.337 | 2.964  | 1.199  | 1             | 2.709  | 1.706  | 1.244  |
| 1           | 1.065  | -0.941 | -2.248 | 1             | -5.191 | -0.191 | -0.079 |
| 1           | -0.263 | -2.604 | -0.976 | 1             | -4.733 | 1.475  | 0.057  |
| 1           | -1.475 | -0.425 | 0.616  |               |        |        |        |
| 1           | 1.945  | 2.756  | -1.107 |               |        |        |        |
| 1           | 2.248  | 1.651  | -2.431 |               |        |        |        |
| 1           | -4.020 | -1.752 | 0.982  |               |        |        |        |
| 1           | -5.823 | -1.380 | -0.485 |               |        |        |        |



|   |            |        |        |    |                |        |        |
|---|------------|--------|--------|----|----------------|--------|--------|
| 1 | -4.758     | -2.241 | -1.394 |    |                |        |        |
| 1 | -3.329     | -0.157 | 2.534  |    |                |        |        |
| 1 | -4.130     | 1.040  | -1.494 |    |                |        |        |
| 1 | 4.625      | -2.527 | 1.336  |    |                |        |        |
| 1 | -2.968     | 2.206  | 3.179  |    |                |        |        |
| 1 | -3.767     | 3.419  | -0.859 |    |                |        |        |
| 1 | -3.183     | 4.001  | 1.480  |    |                |        |        |
|   | Diflunisal |        |        |    | Dihydrocodeine |        |        |
| 9 | -1.990     | -2.104 | 0.952  | 8  | 1.504          | 0.982  | 1.372  |
| 9 | -5.380     | 0.954  | -0.058 | 8  | 1.491          | 2.386  | -0.945 |
| 8 | 4.135      | -1.335 | -0.304 | 8  | 3.764          | -0.620 | 0.626  |
| 8 | 2.750      | 2.545  | 0.481  | 7  | -3.098         | -1.012 | 0.486  |
| 8 | 4.573      | 1.244  | 0.320  | 6  | -0.746         | 0.612  | 0.722  |
| 6 | 0.059      | -0.448 | -0.163 | 6  | -1.899         | 0.972  | -0.220 |
| 6 | -1.372     | -0.094 | -0.140 | 6  | 0.262          | 1.708  | 1.110  |
| 6 | 1.025      | 0.531  | 0.059  | 6  | -2.504         | -0.363 | -0.695 |
| 6 | 0.506      | -1.749 | -0.433 | 6  | -1.348         | -0.089 | 1.953  |
| 6 | 2.398      | 0.267  | 0.020  | 6  | 0.201          | -0.317 | 0.028  |
| 6 | -2.353     | -0.926 | 0.405  | 6  | -1.462         | 1.931  | -1.314 |
| 6 | -1.826     | 1.126  | -0.659 | 6  | 0.512          | 2.770  | 0.008  |
| 6 | 2.819      | -1.049 | -0.256 | 6  | -1.507         | -1.237 | -1.501 |
| 6 | 1.857      | -2.038 | -0.480 | 6  | -0.798         | 3.149  | -0.681 |
| 6 | -3.698     | -0.600 | 0.448  | 6  | -2.136         | -1.320 | 1.539  |
| 6 | -3.162     | 1.497  | -0.639 | 6  | -0.100         | -1.234 | -0.960 |
| 6 | -4.078     | 0.619  | -0.084 | 6  | 1.469          | -0.087 | 0.524  |
| 6 | 3.372      | 1.346  | 0.279  | 6  | -3.909         | -2.164 | 0.162  |
| 1 | 0.715      | 1.543  | 0.293  | 6  | 0.971          | -2.010 | -1.413 |
| 1 | -0.209     | -2.540 | -0.624 | 6  | 2.540          | -0.872 | 0.097  |
| 1 | -1.099     | 1.795  | -1.110 | 6  | 2.252          | -1.841 | -0.878 |
| 1 | 2.187      | -3.050 | -0.701 | 6  | 4.842          | -1.391 | 0.142  |
| 1 | -4.418     | -1.274 | 0.892  | 1  | -2.685         | 1.469  | 0.366  |
| 1 | -3.498     | 2.439  | -1.053 | 1  | -0.006         | 2.209  | 2.045  |
| 1 | 4.235      | -2.273 | -0.501 | 1  | -3.349         | -0.140 | -1.360 |
| 1 | 3.462      | 3.177  | 0.647  | 1  | -2.006         | 0.620  | 2.472  |
|   |            |        |        | 1  | -0.554         | -0.375 | 2.651  |
|   |            |        |        | 1  | -2.323         | 2.229  | -1.921 |
|   |            |        |        | 1  | -0.763         | 1.443  | -2.009 |
|   |            |        |        | 1  | 0.948          | 3.654  | 0.484  |
|   |            |        |        | 1  | -1.490         | -0.876 | -2.539 |
|   |            |        |        | 1  | -1.900         | -2.259 | -1.569 |
|   |            |        |        | 1  | -0.582         | 3.919  | -1.426 |
|   |            |        |        | 1  | -1.484         | 3.596  | 0.051  |
|   |            |        |        | 1  | -1.439         | -2.125 | 1.234  |
|   |            |        |        | 1  | -2.696         | -1.714 | 2.395  |
|   |            |        |        | 1  | -3.331         | -3.045 | -0.173 |
|   |            |        |        | 1  | -4.622         | -1.909 | -0.627 |
|   |            |        |        | 1  | -4.477         | -2.470 | 1.045  |
|   |            |        |        | 1  | 0.823          | -2.749 | -2.195 |
|   |            |        |        | 1  | 1.243          | 1.534  | -1.321 |
|   |            |        |        | 1  | 3.057          | -2.461 | -1.255 |
|   |            |        |        | 1  | 4.988          | -1.249 | -0.935 |
|   |            |        |        | 1  | 4.700          | -2.459 | 0.345  |
|   |            |        |        | 1  | 5.727          | -1.041 | 0.672  |
|   | Carvedilol |        |        |    | Cefadroxil     |        |        |
| 8 | 2.483      | 0.138  | -0.079 | 16 | 0.510          | 0.820  | -1.384 |
| 8 | 4.713      | 2.130  | 0.394  | 8  | 1.643          | -1.596 | 1.974  |
| 8 | -1.241     | 1.896  | -0.306 | 8  | -1.851         | -3.221 | -0.978 |
| 8 | -1.059     | -0.357 | -1.518 | 8  | 5.060          | 0.709  | 1.405  |
| 7 | -0.207     | -3.404 | 1.055  | 8  | 4.670          | -1.475 | 1.032  |
| 7 | 1.212      | 2.933  | -0.248 | 8  | -3.393         | 3.893  | 0.897  |
| 6 | 1.192      | -1.743 | 0.431  | 7  | 2.284          | -0.828 | -0.184 |
| 6 | 0.289      | -1.219 | 1.417  | 7  | -0.913         | -1.454 | 0.097  |
| 6 | 0.853      | -3.097 | 0.224  | 7  | -4.338         | -2.219 | -0.756 |
| 6 | -0.583     | -2.278 | 1.768  | 6  | 1.233          | -0.842 | -1.184 |
| 6 | 2.195      | -1.162 | -0.357 | 6  | 0.428          | -1.784 | -0.249 |
| 6 | 3.574      | 2.244  | -0.452 | 6  | 1.510          | -1.462 | 0.793  |
| 6 | 3.175      | 0.905  | -1.055 | 6  | 3.307          | 0.125  | -0.078 |
| 6 | 2.498      | 2.866  | 0.422  | 6  | 2.121          | 1.599  | -1.722 |
| 6 | 1.488      | -3.890 | -0.732 | 6  | 3.273          | 1.258  | -0.815 |
| 6 | 0.104      | 0.037  | 1.996  | 6  | -1.974         | -2.210 | -0.310 |
| 6 | 2.813      | -1.930 | -1.342 | 6  | 4.372          | 2.270  | -0.881 |
| 6 | -1.629     | -2.105 | 2.668  | 6  | 4.400          | -0.320 | 0.823  |
| 6 | 2.462      | -3.278 | -1.507 | 6  | -3.349         | -1.735 | 0.192  |
| 6 | 0.198      | 3.489  | 0.632  | 6  | -3.429         | -0.238 | 0.379  |
| 6 | -0.941     | 0.217  | 2.890  | 6  | -3.182         | 0.345  | 1.624  |
| 6 | -1.798     | -0.841 | 3.220  | 6  | -3.677         | 0.601  | -0.709 |
| 6 | -1.189     | 3.262  | 0.073  | 6  | -3.168         | 1.724  | 1.788  |
| 6 | -2.425     | 1.345  | -0.668 | 6  | -3.672         | 1.980  | -0.558 |
| 6 | -2.324     | 0.084  | -1.295 | 6  | -3.412         | 2.546  | 0.690  |
| 6 | -3.673     | 1.912  | -0.456 | 1  | 1.554          | -1.237 | -2.152 |
| 6 | -3.483     | -0.596 | -1.650 | 1  | 0.445          | -2.819 | -0.598 |
| 6 | -4.831     | 1.224  | -0.827 | 1  | -1.093         | -0.591 | 0.593  |
| 6 | -4.736     | -0.026 | -1.411 | 1  | 1.938          | 2.677  | -1.662 |
| 6 | -0.925     | -1.596 | -2.184 | 1  | 2.406          | 1.405  | -2.764 |

|    |             |        |        |    |               |        |        |
|----|-------------|--------|--------|----|---------------|--------|--------|
| 1  | 3.788       | 2.916  | -1.299 | 1  | 5.341         | 1.880  | -0.585 |
| 1  | -0.670      | -4.296 | 1.092  | 1  | 4.150         | 3.123  | -0.229 |
| 1  | 4.082       | 0.387  | -1.394 | 1  | 4.451         | 2.666  | -1.899 |
| 1  | 2.524       | 1.047  | -1.930 | 1  | -3.432        | -2.200 | 1.194  |
| 1  | 2.818       | 3.879  | 0.689  | 1  | -5.242        | -2.308 | -0.305 |
| 1  | 2.463       | 2.292  | 1.366  | 1  | -4.052        | -3.141 | -1.074 |
| 1  | 1.219       | -4.930 | -0.882 | 1  | 5.736         | 0.304  | 1.967  |
| 1  | 0.769       | 0.853  | 1.736  | 1  | -2.996        | -0.294 | 2.485  |
| 1  | 3.573       | -1.503 | -1.983 | 1  | -3.884        | 0.152  | -1.675 |
| 1  | -2.295      | -2.922 | 2.925  | 1  | -2.981        | 2.176  | 2.755  |
| 1  | 0.910       | 1.986  | -0.472 | 1  | -3.867        | 2.624  | -1.412 |
| 1  | 2.970       | -3.855 | -2.273 | 1  | -3.586        | 4.338  | 0.066  |
| 1  | 0.246       | 3.047  | 1.645  |    |               |        |        |
| 1  | 0.364       | 4.565  | 0.757  |    |               |        |        |
| 1  | -1.103      | 1.193  | 3.340  |    |               |        |        |
| 1  | -2.610      | -0.673 | 3.919  |    |               |        |        |
| 1  | -1.938      | 3.491  | 0.842  |    |               |        |        |
| 1  | -1.391      | 3.889  | -0.807 |    |               |        |        |
| 1  | 5.462       | 1.855  | -0.141 |    |               |        |        |
| 1  | -3.751      | 2.891  | 0.001  |    |               |        |        |
| 1  | -3.416      | -1.567 | -2.125 |    |               |        |        |
| 1  | -5.800      | 1.678  | -0.652 |    |               |        |        |
| 1  | -5.631      | -0.569 | -1.698 |    |               |        |        |
| 1  | -1.363      | -2.414 | -1.598 |    |               |        |        |
| 1  | -1.400      | -1.572 | -3.173 |    |               |        |        |
| 1  | 0.144       | -1.771 | -2.296 |    |               |        |        |
|    | Albendazole |        |        |    | Chlormezanone |        |        |
| 16 | 3.734       | -1.078 | 0.085  | 17 | 4.975         | 0.110  | -0.348 |
| 8  | -5.935      | -0.346 | -0.180 | 16 | -1.854        | -1.506 | -0.072 |
| 8  | -4.628      | 1.246  | 0.783  | 8  | -2.888        | -1.975 | 0.841  |
| 7  | -1.484      | -1.369 | -0.018 | 8  | -0.875        | -2.427 | -0.640 |
| 7  | -1.862      | 0.819  | -0.396 | 8  | -2.341        | 2.808  | -0.638 |
| 7  | -3.749      | -0.661 | -0.189 | 7  | -1.684        | 1.095  | 0.717  |
| 6  | -0.233      | -0.780 | -0.072 | 6  | -0.931        | -0.130 | 0.842  |
| 6  | -0.499      | 0.585  | -0.306 | 6  | -2.625        | -0.578 | -1.425 |
| 6  | 2.110       | -0.392 | -0.071 | 6  | -1.849        | 0.701  | -1.684 |
| 6  | 1.047       | -1.294 | 0.050  | 6  | 0.536         | -0.052 | 0.513  |
| 6  | 0.569       | 1.468  | -0.430 | 6  | -1.965        | 1.658  | -0.514 |
| 6  | -2.398      | -0.349 | -0.198 | 6  | -1.795        | 1.914  | 1.914  |
| 6  | 4.817       | 0.378  | 0.035  | 6  | 1.358         | -1.147 | 0.797  |
| 6  | 1.862       | 0.973  | -0.313 | 6  | 1.115         | 1.098  | -0.024 |
| 6  | 6.261       | -0.053 | 0.240  | 6  | 2.718         | -1.106 | 0.532  |
| 6  | 7.212       | 1.132  | 0.196  | 6  | 2.477         | 1.156  | -0.290 |
| 6  | -4.754      | 0.208  | 0.196  | 6  | 3.269         | 0.048  | -0.016 |
| 6  | -7.081      | 0.416  | 0.205  | 1  | -1.061        | -0.492 | 1.867  |
| 1  | 1.229       | -2.347 | 0.237  | 1  | -3.656        | -0.382 | -1.126 |
| 1  | -1.694      | -2.298 | 0.312  | 1  | -2.616        | -1.259 | -2.277 |
| 1  | 0.392       | 2.522  | -0.614 | 1  | -2.241        | 1.214  | -2.563 |
| 1  | 4.511       | 1.079  | 0.818  | 1  | -0.797        | 0.471  | -1.889 |
| 1  | 4.705       | 0.883  | -0.931 | 1  | -0.811        | 2.245  | 2.261  |
| 1  | 2.692       | 1.661  | -0.414 | 1  | -2.278        | 1.341  | 2.708  |
| 1  | 6.353       | -0.573 | 1.200  | 1  | -2.395        | 2.789  | 1.674  |
| 1  | 6.537       | -0.784 | -0.528 | 1  | 0.930         | -2.049 | 1.220  |
| 1  | 6.975       | 1.863  | 0.974  | 1  | 0.508         | 1.976  | -0.227 |
| 1  | 8.247       | 0.818  | 0.345  | 1  | 3.351         | -1.959 | 0.747  |
| 1  | 7.161       | 1.649  | -0.766 | 1  | 2.923         | 2.053  | -0.702 |
| 1  | -4.049      | -1.498 | -0.668 |    |               |        |        |
| 1  | -7.129      | 0.522  | 1.290  |    |               |        |        |
| 1  | -7.941      | -0.139 | -0.160 |    |               |        |        |
| 1  | -7.051      | 1.410  | -0.245 |    |               |        |        |
|    | Clonazepam  |        |        |    | Azathioprine  |        |        |
| 17 | -0.967      | -0.551 | 2.204  | 16 | 0.186         | -0.515 | 1.183  |
| 8  | 0.668       | 4.706  | 0.229  | 8  | 2.175         | -2.516 | -0.031 |
| 8  | 3.526       | -3.235 | -0.261 | 8  | 3.812         | -1.919 | -1.340 |
| 8  | 1.576       | -3.444 | -1.198 | 7  | 1.918         | 1.552  | 0.653  |
| 7  | 1.322       | 2.577  | 0.635  | 7  | -3.041        | -1.267 | 0.987  |
| 7  | -1.108      | 2.097  | -0.999 | 7  | 3.629         | 0.643  | -0.448 |
| 7  | 2.434       | -2.801 | -0.608 | 7  | -0.800        | 1.058  | -0.801 |
| 6  | 0.579       | 0.444  | -0.316 | 7  | -4.580        | -0.390 | -0.399 |
| 6  | 1.569       | 1.254  | 0.285  | 7  | 2.923         | -1.683 | -0.541 |
| 6  | -0.795      | 0.936  | -0.552 | 7  | -3.086        | 1.128  | -1.561 |
| 6  | -1.916      | -0.011 | -0.313 | 6  | 1.621         | 0.214  | 0.523  |
| 6  | 0.888       | -0.887 | -0.599 | 6  | -2.379        | -0.339 | 0.218  |
| 6  | 2.811       | 0.696  | 0.628  | 6  | -1.077        | 0.134  | 0.110  |
| 6  | -0.039      | 3.010  | -1.345 | 6  | 2.714         | -0.302 | -0.154 |
| 6  | 2.134       | -1.398 | -0.288 | 6  | 3.120         | 1.747  | 0.046  |
| 6  | 0.653       | 3.548  | -0.112 | 6  | -3.359        | 0.195  | -0.642 |
| 6  | 3.100       | -0.623 | 0.348  | 6  | 1.090         | 2.567  | 1.274  |
| 6  | -2.065      | -0.761 | 0.861  | 6  | -4.345        | -1.244 | 0.561  |
| 6  | -2.891      | -0.161 | -1.306 | 6  | -1.813        | 1.492  | -1.580 |
| 6  | -3.124      | -1.646 | 1.028  | 1  | 3.578         | 2.726  | 0.001  |
| 6  | -3.948      | -1.045 | -1.154 | 1  | 0.241         | 2.803  | 0.631  |
| 6  | -4.059      | -1.794 | 0.012  | 1  | 0.723         | 2.205  | 2.236  |
| 1  | 0.145       | -1.541 | -1.042 | 1  | 1.695         | 3.458  | 1.434  |

|    |               |        |        |    |            |        |        |
|----|---------------|--------|--------|----|------------|--------|--------|
| 1  | 1.918         | 2.976  | 1.349  | 1  | -2.647     | -1.877 | 1.687  |
| 1  | 3.552         | 1.323  | 1.114  | 1  | -5.085     | -1.894 | 1.009  |
| 1  | -0.449        | 3.860  | -1.889 | 1  | -1.534     | 2.243  | -2.316 |
| 1  | 0.723         | 2.523  | -1.976 |    |            |        |        |
| 1  | 4.057         | -1.063 | 0.600  |    |            |        |        |
| 1  | -2.788        | 0.437  | -2.205 |    |            |        |        |
| 1  | -3.212        | -2.201 | 1.954  |    |            |        |        |
| 1  | -4.683        | -1.150 | -1.945 |    |            |        |        |
| 1  | -4.881        | -2.491 | 0.142  |    |            |        |        |
|    | Betamethasone |        |        |    | Dolasetron |        |        |
| 9  | 1.525         | -0.331 | -1.273 | 8  | 0.454      | 0.867  | 0.089  |
| 8  | -2.693        | -0.045 | -2.001 | 8  | -6.600     | -0.928 | 0.154  |
| 8  | 0.403         | -1.732 | 1.861  | 8  | 1.150      | -1.290 | 0.168  |
| 8  | -4.658        | -0.355 | 0.948  | 7  | -3.611     | 0.889  | -0.764 |
| 8  | -5.809        | -2.221 | -0.463 | 7  | 4.432      | 1.920  | -0.080 |
| 8  | 6.238         | -0.662 | -1.686 | 6  | -2.886     | -0.315 | -1.220 |
| 6  | -1.614        | -0.087 | 0.232  | 6  | -3.235     | 1.190  | 0.632  |
| 6  | -0.726        | 1.076  | -0.240 | 6  | -4.255     | -1.115 | 0.743  |
| 6  | 0.654         | 1.095  | 0.407  | 6  | -3.258     | -1.548 | -0.345 |
| 6  | 1.361         | -0.245 | 0.138  | 6  | -3.618     | 0.010  | 1.573  |
| 6  | -2.906        | 0.227  | -0.608 | 6  | -1.392     | -0.014 | -1.238 |
| 6  | -1.630        | 2.289  | -0.086 | 6  | -1.753     | 1.548  | 0.678  |
| 6  | -0.909        | -1.395 | -0.120 | 6  | -0.913     | 0.409  | 0.140  |
| 6  | -3.018        | 1.793  | -0.551 | 6  | -5.048     | 0.641  | -0.833 |
| 6  | 0.503         | -1.491 | 0.460  | 6  | -5.462     | -0.533 | 0.044  |
| 6  | 2.827         | -0.279 | 0.707  | 6  | 1.407      | -0.105 | 0.104  |
| 6  | 1.482         | 2.267  | -0.118 | 6  | 2.745      | 0.457  | 0.039  |
| 6  | -1.930        | -0.010 | 1.729  | 6  | 3.978      | -0.282 | 0.039  |
| 6  | 2.932         | 2.235  | 0.362  | 6  | 3.075      | 1.793  | -0.035 |
| 6  | 3.550         | 0.902  | 0.089  | 6  | 5.022      | 0.669  | -0.037 |
| 6  | -4.135        | -0.532 | -0.136 | 6  | 4.302      | -1.643 | 0.095  |
| 6  | -4.162        | 2.405  | 0.239  | 6  | 6.366      | 0.309  | -0.059 |
| 6  | 2.896         | -0.117 | 2.247  | 6  | 5.639      | -2.006 | 0.073  |
| 6  | 3.481         | -1.587 | 0.370  | 6  | 6.659      | -1.044 | -0.003 |
| 6  | 4.648         | 0.755  | -0.669 | 1  | -3.213     | -0.493 | -2.250 |
| 6  | -4.726        | -1.580 | -1.055 | 1  | -3.811     | 2.078  | 0.915  |
| 6  | 4.574         | -1.714 | -0.386 | 1  | -4.560     | -1.956 | 1.369  |
| 6  | 5.242         | -0.545 | -0.983 | 1  | -2.371     | -1.979 | 0.135  |
| 1  | -0.565        | 0.924  | -1.315 | 1  | -3.690     | -2.344 | -0.958 |
| 1  | 0.544         | 1.193  | 1.496  | 1  | -4.309     | 0.344  | 2.353  |
| 1  | -1.669        | 2.615  | 0.962  | 1  | -2.740     | -0.389 | 2.093  |
| 1  | -1.299        | 3.151  | -0.672 | 1  | -0.832     | -0.891 | -1.574 |
| 1  | -0.793        | -1.474 | -1.207 | 1  | -1.201     | 0.803  | -1.942 |
| 1  | -1.469        | -2.273 | 0.224  | 1  | -1.583     | 2.439  | 0.064  |
| 1  | -3.151        | 2.070  | -1.602 | 1  | -1.453     | 1.789  | 1.702  |
| 1  | 1.000         | -2.339 | -0.030 | 1  | -0.942     | -0.450 | 0.820  |
| 1  | 1.010         | 3.208  | 0.180  | 1  | -5.344     | 0.441  | -1.869 |
| 1  | 1.466         | 2.241  | -1.214 | 1  | -5.598     | 1.537  | -0.521 |
| 1  | -2.586        | 0.827  | 1.967  | 1  | 2.429      | 2.656  | -0.058 |
| 1  | -2.433        | -0.915 | 2.071  | 1  | 4.928      | 2.794  | -0.139 |
| 1  | -1.020        | 0.084  | 2.321  | 1  | 3.513      | -2.383 | 0.153  |
| 1  | 2.959         | 2.438  | 1.442  | 1  | 7.152      | 1.055  | -0.117 |
| 1  | 3.517         | 3.024  | -0.117 | 1  | 5.907      | -3.057 | 0.116  |
| 1  | -4.120        | 2.154  | 1.301  | 1  | 7.695      | -1.365 | -0.017 |
| 1  | -4.113        | 3.494  | 0.151  |    |            |        |        |
| 1  | -5.141        | 2.091  | -0.130 |    |            |        |        |
| 1  | 2.208         | 0.640  | 2.624  |    |            |        |        |
| 1  | 2.676         | -1.047 | 2.771  |    |            |        |        |
| 1  | 3.911         | 0.176  | 2.527  |    |            |        |        |
| 1  | -2.402        | -0.956 | -2.106 |    |            |        |        |
| 1  | 3.038         | -2.476 | 0.820  |    |            |        |        |
| 1  | 1.159         | -2.257 | 2.133  |    |            |        |        |
| 1  | 5.145         | 1.624  | -1.093 |    |            |        |        |
| 1  | -3.936        | -2.307 | -1.316 |    |            |        |        |
| 1  | -5.008        | -1.097 | -2.001 |    |            |        |        |
| 1  | 5.024         | -2.682 | -0.582 |    |            |        |        |
| 1  | -5.902        | -1.809 | 0.412  |    |            |        |        |
|    | Carbinoxamine |        |        |    | Cetirizine |        |        |
| 17 | 5.583         | -1.494 | -0.338 | 17 | -6.346     | -3.293 | -0.509 |
| 8  | -0.984        | -0.775 | 0.130  | 8  | 5.781      | -0.628 | -0.120 |
| 7  | -4.574        | -1.406 | -0.234 | 8  | 9.243      | 0.108  | 0.105  |
| 7  | -0.334        | 1.715  | -1.119 | 8  | 8.187      | -1.573 | -0.967 |
| 6  | -0.113        | 0.159  | 0.736  | 7  | -0.632     | 0.239  | 0.225  |
| 6  | -2.353        | -0.493 | 0.352  | 7  | 2.162      | -0.444 | 0.436  |
| 6  | -3.142        | -1.659 | -0.204 | 6  | -0.183     | -1.017 | 0.826  |
| 6  | 1.302         | -0.288 | 0.481  | 6  | 0.395      | 1.252  | 0.464  |
| 6  | -0.327        | 1.572  | 0.211  | 6  | 1.133      | -1.453 | 0.221  |
| 6  | 2.282         | -0.119 | 1.455  | 6  | 1.716      | 0.821  | -0.136 |
| 6  | 1.658         | -0.828 | -0.755 | 6  | -1.937     | 0.648  | 0.752  |
| 6  | -0.485        | 2.643  | 1.087  | 6  | 3.435      | -0.880 | -0.115 |
| 6  | -5.137        | -1.300 | 1.099  | 6  | -3.007     | -0.384 | 0.447  |
| 6  | -5.254        | -2.443 | -0.986 | 6  | -2.376     | 1.986  | 0.186  |
| 6  | 3.602         | -0.483 | 1.214  | 6  | 4.596      | -0.049 | 0.389  |
| 6  | 2.970         | -1.202 | -1.011 | 6  | -3.024     | -1.075 | -0.766 |



|    |            |        |        |    |               |        |        |
|----|------------|--------|--------|----|---------------|--------|--------|
| 6  | -2.569     | 0.521  | 0.333  | 7  | 4.040         | 0.908  | -0.629 |
| 6  | -0.286     | 1.133  | -0.563 | 6  | -0.464        | -0.071 | 0.728  |
| 6  | -3.220     | -0.656 | -0.011 | 6  | 0.809         | 0.501  | 1.357  |
| 6  | -2.907     | -0.992 | -1.424 | 6  | 1.818         | 1.082  | 0.356  |
| 6  | 0.453      | -0.039 | -0.423 | 6  | 3.199         | 0.454  | 0.472  |
| 6  | -2.703     | 1.072  | 1.596  | 1  | 1.276         | -0.306 | 1.938  |
| 6  | 0.348      | 2.359  | -0.381 | 1  | 0.490         | 1.252  | 2.086  |
| 6  | 1.806      | 0.008  | -0.115 | 1  | 1.471         | 0.919  | -0.673 |
| 6  | -4.025     | -1.329 | 0.897  | 1  | 1.907         | 2.165  | 0.484  |
| 6  | -3.512     | 0.403  | 2.514  | 1  | 3.664         | 0.766  | 1.415  |
| 6  | 1.701      | 2.415  | -0.071 | 1  | 3.080         | -0.640 | 0.520  |
| 6  | 2.435      | 1.244  | 0.060  | 1  | -1.193        | -1.340 | 2.044  |
| 6  | -4.163     | -0.785 | 2.171  | 1  | -1.556        | -1.110 | -1.786 |
| 1  | -1.646     | 0.024  | -2.759 | 1  | 0.494         | -3.334 | 0.797  |
| 1  | -0.011     | -1.012 | -0.552 | 1  | -2.876        | 0.574  | 1.042  |
| 1  | -2.195     | 1.993  | 1.865  | 1  | -0.177        | 2.934  | -0.666 |
| 1  | -0.220     | 3.275  | -0.489 | 1  | 3.706         | 0.480  | -1.489 |
| 1  | -4.523     | -2.250 | 0.611  | 1  | 4.988         | 0.571  | -0.505 |
| 1  | -3.141     | 2.316  | -1.374 |    |               |        |        |
| 1  | 2.197      | 3.368  | 0.070  |    |               |        |        |
| 1  | -3.635     | 0.808  | 3.513  |    |               |        |        |
| 1  | -4.782     | -1.285 | 2.908  |    |               |        |        |
| 1  | 2.987      | -2.421 | 2.004  |    |               |        |        |
| 1  | 4.254      | -1.413 | 1.572  |    |               |        |        |
|    | Codeine    |        |        |    | Amiloride     |        |        |
| 8  | 1.623      | 1.032  | 1.058  | 17 | 2.683         | -2.303 | 0.022  |
| 8  | 1.865      | 3.356  | -0.204 | 8  | -2.091        | 1.646  | 0.048  |
| 8  | 3.701      | -0.827 | 0.544  | 7  | 2.114         | 1.632  | -0.012 |
| 7  | -3.349     | -0.418 | 0.407  | 7  | 0.596         | -0.684 | 0.004  |
| 6  | -0.724     | 0.731  | 0.601  | 7  | 0.231         | 2.926  | -0.065 |
| 6  | -1.674     | 1.040  | -0.572 | 7  | -2.096        | -0.687 | 0.013  |
| 6  | -2.524     | -0.226 | -0.796 | 7  | 4.048         | 0.378  | -0.051 |
| 6  | 0.370      | 1.777  | 0.887  | 7  | -3.926        | -2.040 | -0.149 |
| 6  | -1.553     | 0.410  | 1.852  | 7  | -4.295        | 0.232  | 0.106  |
| 6  | 0.117      | -0.431 | 0.163  | 6  | -0.025        | 0.505  | -0.007 |
| 6  | -1.679     | -1.462 | -1.208 | 6  | 0.770         | 1.691  | -0.023 |
| 6  | -2.549     | -0.705 | 1.592  | 6  | 2.691         | 0.439  | -0.010 |
| 6  | -0.289     | -1.491 | -0.629 | 6  | 1.886         | -0.729 | -0.004 |
| 6  | 0.564      | 2.808  | -0.243 | 6  | -1.500        | 0.540  | 0.019  |
| 6  | -0.881     | 1.489  | -1.763 | 6  | -3.405        | -0.782 | -0.002 |
| 6  | 1.431      | -0.199 | 0.493  | 1  | 0.851         | 3.713  | 0.027  |
| 6  | 0.184      | 2.275  | -1.600 | 1  | -0.774        | 3.003  | 0.023  |
| 6  | -4.400     | -1.395 | 0.228  | 1  | 4.545         | 1.230  | 0.151  |
| 6  | 0.697      | -2.425 | -0.958 | 1  | 4.493         | -0.494 | 0.188  |
| 6  | 2.425      | -1.122 | 0.177  | 1  | -3.241        | -2.769 | -0.019 |
| 6  | 2.018      | -2.257 | -0.536 | 1  | -4.833        | -2.227 | 0.250  |
| 6  | 4.700      | -1.755 | 0.181  | 1  | -3.876        | 1.157  | 0.045  |
| 1  | -2.377     | 1.832  | -0.270 | 1  | -5.246        | 0.090  | -0.194 |
| 1  | -3.231     | -0.023 | -1.610 |    |               |        |        |
| 1  | 0.223      | 2.298  | 1.836  |    |               |        |        |
| 1  | -2.089     | 1.318  | 2.155  |    |               |        |        |
| 1  | -0.887     | 0.132  | 2.677  |    |               |        |        |
| 1  | -1.591     | -1.481 | -2.301 |    |               |        |        |
| 1  | -2.236     | -2.373 | -0.957 |    |               |        |        |
| 1  | -2.018     | -1.674 | 1.503  |    |               |        |        |
| 1  | -3.231     | -0.808 | 2.442  |    |               |        |        |
| 1  | -0.116     | 3.643  | -0.016 |    |               |        |        |
| 1  | -1.183     | 1.157  | -2.754 |    |               |        |        |
| 1  | 0.776      | 2.628  | -2.439 |    |               |        |        |
| 1  | -4.040     | -2.436 | 0.128  |    |               |        |        |
| 1  | -4.984     | -1.154 | -0.664 |    |               |        |        |
| 1  | -5.072     | -1.369 | 1.090  |    |               |        |        |
| 1  | 0.449      | -3.284 | -1.576 |    |               |        |        |
| 1  | 2.754      | -3.002 | -0.814 |    |               |        |        |
| 1  | 2.454      | 2.630  | 0.040  |    |               |        |        |
| 1  | 4.524      | -2.737 | 0.636  |    |               |        |        |
| 1  | 5.641      | -1.352 | 0.553  |    |               |        |        |
| 1  | 4.763      | -1.875 | -0.908 |    |               |        |        |
|    | Ampicillin |        |        |    | Cephaloglycin |        |        |
| 16 | -0.713     | 0.859  | 0.896  | 16 | 0.098         | 0.990  | -0.637 |
| 8  | -1.106     | -1.654 | -2.278 | 8  | 1.919         | -2.207 | 1.540  |
| 8  | -5.146     | 0.539  | -0.904 | 8  | -2.176        | -2.226 | -1.525 |
| 8  | -4.804     | -1.344 | 0.288  | 8  | 5.107         | 0.446  | 1.095  |
| 8  | 2.383      | -2.932 | 0.841  | 8  | 4.702         | -1.563 | 0.164  |
| 7  | -2.027     | -1.125 | -0.164 | 7  | 2.112         | -0.787 | -0.360 |
| 7  | 1.271      | -1.263 | -0.228 | 7  | -0.941        | -1.728 | 0.312  |
| 7  | 4.686      | -1.539 | 0.899  | 7  | -4.522        | -2.048 | -0.171 |
| 6  | -1.021     | -0.941 | 0.885  | 6  | 0.882         | -0.587 | -1.105 |
| 6  | -2.517     | 1.158  | 0.531  | 6  | 0.304         | -1.831 | -0.378 |
| 6  | -2.908     | -0.011 | -0.442 | 6  | 1.560         | -1.743 | 0.496  |
| 6  | -0.032     | -1.773 | 0.026  | 6  | 3.112         | 0.174  | -0.155 |
| 6  | -1.079     | -1.585 | -1.081 | 6  | 1.587         | 1.959  | -1.036 |
| 6  | -3.307     | 1.096  | 1.835  | 6  | 2.905         | 1.466  | -0.499 |
| 6  | -2.672     | 2.514  | -0.136 | 6  | -2.122        | -1.856 | -0.365 |

|               |        |        |        |                |        |        |        |
|---------------|--------|--------|--------|----------------|--------|--------|--------|
| 6             | -4.369 | -0.390 | -0.296 | 6              | -3.355 | -1.432 | 0.435  |
| 6             | 2.399  | -1.877 | 0.233  | 6              | 3.943  | 2.541  | -0.459 |
| 6             | 3.722  | -1.174 | -0.124 | 6              | 4.371  | -0.421 | 0.361  |
| 6             | 3.574  | 0.325  | -0.258 | 6              | -3.355 | 0.084  | 0.504  |
| 6             | 3.359  | 0.907  | -1.508 | 6              | -3.552 | 0.825  | -0.787 |
| 6             | 3.576  | 1.140  | 0.877  | 6              | -3.152 | 0.714  | 1.665  |
| 6             | 3.137  | 2.276  | -1.626 | 6              | -3.077 | 2.197  | 1.817  |
| 6             | 3.357  | 2.506  | 0.759  | 6              | -3.492 | 2.309  | -0.633 |
| 6             | 3.134  | 3.079  | -0.491 | 6              | -3.278 | 2.925  | 0.528  |
| 1             | -1.297 | -1.320 | 1.871  | 1              | 1.008  | -0.646 | -2.189 |
| 1             | -2.740 | 0.308  | -1.478 | 1              | 0.284  | -2.700 | -1.040 |
| 1             | 0.065  | -2.803 | 0.379  | 1              | -0.952 | -1.261 | 1.209  |
| 1             | -3.239 | 0.116  | 2.313  | 1              | 1.397  | 2.959  | -0.634 |
| 1             | -2.935 | 1.844  | 2.537  | 1              | 1.657  | 2.087  | -2.125 |
| 1             | -4.368 | 1.305  | 1.656  | 1              | -3.235 | -1.807 | 1.462  |
| 1             | -2.368 | 3.316  | 0.540  | 1              | 4.962  | 2.162  | -0.460 |
| 1             | -2.071 | 2.584  | -1.045 | 1              | 3.825  | 3.157  | 0.440  |
| 1             | -3.719 | 2.682  | -0.402 | 1              | 3.818  | 3.210  | -1.316 |
| 1             | 1.351  | -0.345 | -0.647 | 1              | -4.510 | 0.531  | -1.243 |
| 1             | 3.967  | -1.575 | -1.127 | 1              | -2.803 | 0.495  | -1.524 |
| 1             | -6.065 | 0.269  | -0.766 | 1              | -3.023 | 0.117  | 2.569  |
| 1             | 5.629  | -1.466 | 0.536  | 1              | -4.375 | -2.114 | -1.176 |
| 1             | 4.523  | -2.507 | 1.160  | 1              | -5.349 | -1.485 | -0.007 |
| 1             | 3.365  | 0.278  | -2.397 | 1              | -2.107 | 2.474  | 2.259  |
| 1             | 3.760  | 0.682  | 1.844  | 1              | -3.812 | 2.538  | 2.563  |
| 1             | 2.974  | 2.715  | -2.605 | 1              | -3.630 | 2.900  | -1.536 |
| 1             | 3.359  | 3.130  | 1.648  | 1              | -3.247 | 4.011  | 0.563  |
| 1             | 2.965  | 4.147  | -0.579 | 1              | 5.889  | -0.048 | 1.380  |
| Acetohexamide |        |        |        | Chlorpropamide |        |        |        |
| 16            | -0.643 | 2.514  | -0.151 | 17             | 4.297  | 2.184  | 0.057  |
| 8             | 0.826  | 0.416  | 1.437  | 16             | -0.129 | -2.242 | -0.096 |
| 8             | -0.653 | 3.133  | 1.152  | 8              | -0.257 | -2.808 | 1.225  |
| 8             | -0.837 | 3.262  | -1.380 | 8              | 0.077  | -3.050 | -1.284 |
| 8             | -4.993 | -2.496 | -1.207 | 8              | -1.534 | 0.007  | 1.332  |
| 7             | 2.665  | 0.418  | 0.082  | 7              | -1.573 | -1.425 | -0.466 |
| 7             | 0.878  | 1.806  | -0.394 | 7              | -3.219 | 0.178  | -0.195 |
| 6             | 3.420  | -0.524 | 0.919  | 6              | -3.907 | 1.237  | 0.536  |
| 6             | 3.016  | -1.967 | 0.610  | 6              | 1.124  | -0.981 | -0.047 |
| 6             | 4.914  | -0.315 | 0.692  | 6              | -3.335 | 2.619  | 0.252  |
| 6             | 3.454  | -2.393 | -0.786 | 6              | -2.078 | -0.370 | 0.314  |
| 6             | 5.358  | -0.753 | -0.701 | 6              | 1.436  | -0.374 | 1.165  |
| 6             | 4.953  | -2.196 | -0.981 | 6              | 1.781  | -0.637 | -1.225 |
| 6             | 1.424  | 0.833  | 0.466  | 6              | -3.466 | 3.035  | -1.202 |
| 6             | -1.794 | 1.151  | -0.131 | 6              | 2.419  | 0.605  | 1.197  |
| 6             | -2.153 | 0.588  | 1.088  | 6              | 2.762  | 0.343  | -1.195 |
| 6             | -2.319 | 0.694  | -1.337 | 6              | 3.068  | 0.955  | 0.017  |
| 6             | -3.592 | -0.951 | -0.105 | 1              | -3.845 | 1.013  | 1.604  |
| 6             | -3.058 | -0.464 | 1.092  | 1              | -4.963 | 1.193  | 0.249  |
| 6             | -3.215 | -0.362 | -1.317 | 1              | -3.848 | 3.338  | 0.901  |
| 6             | -4.568 | -2.086 | -0.144 | 1              | -2.284 | 2.628  | 0.561  |
| 6             | -5.001 | -2.697 | 1.162  | 1              | -1.815 | -1.494 | -1.446 |
| 1             | 3.164  | -0.297 | 1.960  | 1              | -3.723 | -0.322 | -0.910 |
| 1             | 1.935  | -2.073 | 0.739  | 1              | 0.905  | -0.665 | 2.063  |
| 1             | 3.485  | -2.617 | 1.360  | 1              | 1.536  | -1.148 | -2.150 |
| 1             | 5.449  | -0.911 | 1.441  | 1              | -4.514 | 3.067  | -1.517 |
| 1             | 5.180  | 0.730  | 0.884  | 1              | -3.041 | 4.025  | -1.378 |
| 1             | 2.909  | -1.797 | -1.531 | 1              | -2.945 | 2.335  | -1.862 |
| 1             | 3.174  | -3.435 | -0.968 | 1              | 2.683  | 1.094  | 2.126  |
| 1             | 6.440  | -0.625 | -0.804 | 1              | 3.294  | 0.626  | -2.096 |
| 1             | 4.912  | -0.099 | -1.465 |                |        |        |        |
| 1             | 5.498  | -2.859 | -0.295 |                |        |        |        |
| 1             | 5.254  | -2.488 | -1.992 |                |        |        |        |
| 1             | 3.182  | 0.991  | -0.567 |                |        |        |        |
| 1             | 1.191  | 1.871  | -1.355 |                |        |        |        |
| 1             | -1.719 | 0.971  | 2.003  |                |        |        |        |
| 1             | -2.036 | 1.176  | -2.267 |                |        |        |        |
| 1             | -3.344 | -0.908 | 2.040  |                |        |        |        |
| 1             | -3.651 | -0.748 | -2.233 |                |        |        |        |
| 1             | -5.463 | -1.948 | 1.811  |                |        |        |        |
| 1             | -4.143 | -3.102 | 1.708  |                |        |        |        |
| 1             | -5.713 | -3.497 | 0.971  |                |        |        |        |
| Captopril     |        |        |        | Budesonide     |        |        |        |
| 16            | -3.435 | 0.659  | -1.157 | 8              | -2.537 | 0.716  | -0.266 |
| 8             | -0.475 | -1.323 | -0.882 | 8              | -2.776 | 1.064  | 1.934  |
| 8             | 3.165  | -1.379 | -1.272 | 8              | 1.465  | -2.373 | -1.493 |
| 8             | 2.308  | -1.355 | 0.811  | 8              | -3.952 | -2.422 | 0.411  |
| 7             | 0.423  | 0.537  | 0.011  | 8              | -5.012 | -2.131 | -1.986 |
| 6             | 1.629  | 0.347  | -0.777 | 8              | 6.097  | 2.549  | -1.016 |
| 6             | 2.432  | 1.619  | -0.491 | 6              | -0.970 | -1.137 | 0.039  |
| 6             | 2.044  | 1.954  | 0.946  | 6              | -0.194 | -0.372 | 1.129  |
| 6             | 0.563  | 1.597  | 1.012  | 6              | 1.292  | -0.698 | 1.168  |
| 6             | -0.563 | -0.397 | -0.086 | 6              | -2.408 | -0.586 | 0.298  |
| 6             | -1.740 | -0.280 | 0.870  | 6              | 1.897  | -0.378 | -0.215 |
| 6             | 2.368  | -0.893 | -0.300 | 6              | -1.050 | -0.556 | 2.375  |



|   |             |        |        |    |                  |        |        |
|---|-------------|--------|--------|----|------------------|--------|--------|
| 1 | 5.016       | -2.267 | 1.168  | 1  | -4.119           | 2.022  | 1.353  |
| 1 | -6.184      | -1.874 | 1.390  | 1  | -1.496           | -1.931 | 0.728  |
| 1 | 6.184       | 1.874  | 1.390  | 1  | -1.457           | -2.566 | -0.897 |
| 1 | -6.673      | 0.522  | 1.814  | 1  | -1.912           | 2.958  | -0.242 |
| 1 | 6.673       | -0.522 | 1.814  | 1  | -1.543           | 2.102  | -1.730 |
| 1 | -0.875      | -2.264 | -0.889 | 1  | -6.305           | 1.344  | -0.659 |
| 1 | 0.875       | 2.264  | -0.889 | 1  | -6.438           | 1.330  | 1.081  |
|   |             |        |        | 1  | -2.715           | -0.774 | 2.163  |
|   |             |        |        | 1  | -4.214           | 0.104  | 2.452  |
|   |             |        |        | 1  | -4.245           | -1.649 | 2.276  |
|   |             |        |        | 1  | 0.222            | 2.477  | 0.730  |
|   |             |        |        | 1  | 0.566            | 3.009  | -0.894 |
|   |             |        |        | 1  | 0.533            | -2.422 | -1.082 |
|   |             |        |        | 1  | 2.771            | 1.922  | -0.416 |
|   |             |        |        | 1  | 3.000            | -2.296 | -1.062 |
|   |             |        |        | 1  | 6.933            | -0.747 | -0.379 |
|   | Anastrozole |        |        |    | Cyclophosphamide |        |        |
| 7 | -3.249      | 1.271  | -0.272 | 17 | -3.473           | -2.252 | -0.451 |
| 7 | -4.032      | 0.292  | -0.790 | 17 | -1.228           | 4.007  | -0.069 |
| 7 | 2.284       | -3.733 | -1.140 | 15 | 0.993            | -0.698 | 0.873  |
| 7 | 4.109       | 0.848  | 2.126  | 8  | 2.202            | 0.383  | 0.855  |
| 7 | -4.751      | 0.882  | 1.280  | 8  | 0.673            | -1.143 | 2.242  |
| 6 | 0.270       | -2.630 | 0.141  | 7  | -0.194           | 0.103  | -0.025 |
| 6 | 2.924       | 1.646  | -0.081 | 7  | 1.424            | -1.926 | -0.173 |
| 6 | 0.292       | -1.122 | -0.126 | 6  | 2.187            | -1.561 | -1.376 |
| 6 | 1.562       | 0.951  | -0.182 | 6  | 3.342            | -0.615 | -1.074 |
| 6 | 1.494       | -0.428 | -0.002 | 6  | 2.853            | 0.654  | -0.401 |
| 6 | -0.818      | 0.968  | -0.617 | 6  | -1.259           | -0.691 | -0.643 |
| 6 | -0.864      | -0.414 | -0.440 | 6  | -0.622           | 1.411  | 0.484  |
| 6 | 0.392       | 1.644  | -0.485 | 6  | -2.109           | -1.429 | 0.376  |
| 6 | -2.068      | 1.731  | -0.981 | 6  | -0.570           | 2.438  | -0.630 |
| 6 | -1.023      | -3.309 | -0.328 | 1  | 1.495            | -1.084 | -2.082 |
| 6 | 0.465       | -2.877 | 1.651  | 1  | 2.536            | -2.480 | -1.853 |
| 6 | 2.824       | 3.175  | -0.034 | 1  | 4.076            | -1.111 | -0.430 |
| 6 | 3.797       | 1.224  | -1.279 | 1  | 3.856            | -0.343 | -2.002 |
| 6 | 1.395       | -3.243 | -0.579 | 1  | 1.795            | -2.725 | 0.326  |
| 6 | 3.581       | 1.197  | 1.155  | 1  | 3.675            | 1.331  | -0.161 |
| 6 | -3.689      | 1.596  | 0.961  | 1  | 2.152            | 1.184  | -1.060 |
| 6 | -4.914      | 0.105  | 0.181  | 1  | -0.821           | -1.409 | -1.341 |
| 1 | 2.401       | -0.977 | 0.245  | 1  | -1.890           | -0.016 | -1.232 |
| 1 | -1.816      | -0.922 | -0.555 | 1  | 0.029            | 1.723  | 1.304  |
| 1 | 0.409       | 2.722  | -0.616 | 1  | -1.638           | 1.359  | 0.896  |
| 1 | -1.940      | 2.797  | -0.772 | 1  | -1.534           | -2.194 | 0.899  |
| 1 | -2.293      | 1.633  | -2.047 | 1  | -2.539           | -0.755 | 1.119  |
| 1 | -1.219      | -3.123 | -1.385 | 1  | 0.455            | 2.617  | -0.958 |
| 1 | -1.873      | -2.945 | 0.253  | 1  | -1.164           | 2.131  | -1.493 |
| 1 | -0.954      | -4.388 | -0.179 |    |                  |        |        |
| 1 | 1.398       | -2.439 | 2.010  |    |                  |        |        |
| 1 | -0.362      | -2.418 | 2.199  |    |                  |        |        |
| 1 | 0.478       | -3.946 | 1.869  |    |                  |        |        |
| 1 | 2.188       | 3.516  | 0.786  |    |                  |        |        |
| 1 | 2.419       | 3.556  | -0.974 |    |                  |        |        |
| 1 | 3.814       | 3.612  | 0.102  |    |                  |        |        |
| 1 | 3.922       | 0.141  | -1.321 |    |                  |        |        |
| 1 | 3.316       | 1.548  | -2.206 |    |                  |        |        |
| 1 | 4.785       | 1.685  | -1.219 |    |                  |        |        |
| 1 | -3.214      | 2.353  | 1.570  |    |                  |        |        |
| 1 | -5.710      | -0.619 | 0.083  |    |                  |        |        |
|   | Acrivastine |        |        |    | Atropine         |        |        |
| 8 | -5.774      | 1.125  | 0.401  | 8  | 0.104            | 0.170  | 0.441  |
| 8 | -6.471      | -1.017 | 0.382  | 8  | 0.515            | 1.891  | -0.958 |
| 7 | 0.464       | 3.112  | -0.603 | 8  | 2.511            | 3.521  | 0.240  |
| 7 | -1.413      | -1.238 | -0.248 | 7  | -3.900           | -0.560 | 0.906  |
| 6 | 1.171       | 4.380  | -0.724 | 6  | -3.621           | 0.762  | 0.314  |
| 6 | 0.105       | 3.045  | 0.811  | 6  | -3.228           | -1.453 | -0.056 |
| 6 | 0.313       | 5.349  | 0.086  | 6  | -3.887           | 0.590  | -1.202 |
| 6 | -0.404      | 4.450  | 1.116  | 6  | -3.622           | -0.910 | -1.452 |
| 6 | 1.247       | 1.974  | -1.053 | 6  | -2.158           | 1.095  | 0.602  |
| 6 | 0.449       | 0.720  | -0.951 | 6  | -1.724           | -1.352 | 0.195  |
| 6 | 0.863       | -0.491 | -0.530 | 6  | -1.256           | 0.068  | -0.064 |
| 6 | 2.270       | -0.786 | -0.179 | 6  | -5.324           | -0.829 | 1.008  |
| 6 | -0.132      | -1.586 | -0.411 | 6  | 0.879            | 1.117  | -0.095 |
| 6 | 3.324       | -0.433 | -1.026 | 6  | 2.271            | 1.093  | 0.506  |
| 6 | 2.590       | -1.424 | 1.027  | 6  | 2.965            | -0.222 | 0.241  |
| 6 | 0.262       | -2.934 | -0.493 | 6  | 3.095            | 2.269  | -0.031 |
| 6 | 4.644       | -0.696 | -0.677 | 6  | 3.586            | -0.926 | 1.271  |
| 6 | 3.907       | -1.678 | 1.375  | 6  | 3.037            | -0.729 | -1.060 |
| 6 | 4.963       | -1.319 | 0.529  | 6  | 4.264            | -2.113 | 1.011  |
| 6 | -2.344      | -2.200 | -0.164 | 6  | 3.712            | -1.915 | -1.321 |
| 6 | -0.701      | -3.926 | -0.406 | 6  | 4.328            | -2.610 | -0.286 |
| 6 | -2.029      | -3.562 | -0.236 | 1  | -4.270           | 1.513  | 0.772  |
| 6 | 6.383       | -1.593 | 0.917  | 1  | -3.562           | -2.482 | 0.104  |
| 6 | -3.731      | -1.787 | 0.020  | 1  | -3.247           | 1.241  | -1.804 |
| 6 | -4.144      | -0.517 | 0.128  | 1  | -4.919           | 0.854  | -1.446 |



|            |        |        |        |           |        |        |        |
|------------|--------|--------|--------|-----------|--------|--------|--------|
| 6          | -5.567 | -0.215 | 0.312  | 1         | -4.520 | -1.412 | -1.822 |
| 1          | 1.286  | 4.660  | -1.776 | 1         | -2.839 | -1.085 | -2.195 |
| 1          | 2.189  | 4.307  | -0.289 | 1         | -1.906 | 2.097  | 0.242  |
| 1          | 0.996  | 2.807  | 1.428  | 1         | -1.995 | 1.069  | 1.684  |
| 1          | -0.631 | 2.255  | 0.989  | 1         | -1.518 | -1.617 | 1.236  |
| 1          | -0.411 | 5.851  | -0.559 | 1         | -1.172 | -2.049 | -0.443 |
| 1          | 0.918  | 6.128  | 0.553  | 1         | -1.209 | 0.268  | -1.141 |
| 1          | -0.194 | 4.740  | 2.148  | 1         | -5.779 | -0.118 | 1.702  |
| 1          | -1.488 | 4.502  | 0.985  | 1         | -5.476 | -1.833 | 1.413  |
| 1          | 2.196  | 1.888  | -0.488 | 1         | -5.876 | -0.766 | 0.053  |
| 1          | 1.529  | 2.162  | -2.100 | 1         | 2.149  | 1.217  | 1.588  |
| 1          | -0.605 | 0.825  | -1.198 | 1         | 3.262  | 2.127  | -1.110 |
| 1          | 3.102  | 0.037  | -1.980 | 1         | 4.077  | 2.263  | 0.451  |
| 1          | 1.789  | -1.713 | 1.703  | 1         | 3.534  | -0.541 | 2.286  |
| 1          | 1.307  | -3.184 | -0.638 | 1         | 2.555  | -0.190 | -1.873 |
| 1          | 5.444  | -0.418 | -1.359 | 1         | 1.712  | 3.561  | -0.299 |
| 1          | 4.127  | -2.163 | 2.323  | 1         | 4.741  | -2.650 | 1.825  |
| 1          | -0.419 | -4.972 | -0.475 | 1         | 3.758  | -2.297 | -2.336 |
| 1          | -2.814 | -4.307 | -0.157 | 1         | 4.855  | -3.537 | -0.489 |
| 1          | 7.074  | -1.362 | 0.104  |           |        |        |        |
| 1          | 6.683  | -0.995 | 1.783  |           |        |        |        |
| 1          | 6.530  | -2.641 | 1.194  |           |        |        |        |
| 1          | -4.480 | -2.575 | 0.075  |           |        |        |        |
| 1          | -3.438 | 0.305  | 0.082  |           |        |        |        |
| 1          | -6.727 | 1.243  | 0.520  |           |        |        |        |
| Baclofen   |        |        |        | Enoxacin  |        |        |        |
| 17         | 4.402  | 0.163  | -0.144 | 9         | 1.927  | -2.788 | -0.496 |
| 8          | -2.497 | 2.618  | -0.990 | 8         | -3.077 | -2.375 | -0.211 |
| 8          | -1.926 | 2.031  | 1.104  | 8         | -5.508 | -1.135 | -0.023 |
| 7          | -3.321 | -2.549 | 0.164  | 8         | -5.526 | 1.088  | 0.266  |
| 6          | -1.566 | -0.700 | 0.307  | 7         | 2.902  | -0.171 | -0.003 |
| 6          | -0.077 | -0.474 | 0.192  | 7         | 5.603  | 0.600  | 0.325  |
| 6          | -2.348 | 0.308  | -0.532 | 7         | -1.463 | 1.378  | 0.279  |
| 6          | -1.941 | -2.149 | -0.060 | 7         | 0.692  | 0.532  | 0.159  |
| 6          | 0.674  | -0.067 | 1.295  | 6         | 3.273  | 1.242  | 0.059  |
| 6          | 0.589  | -0.673 | -1.021 | 6         | 3.853  | -1.025 | 0.720  |
| 6          | -2.217 | 1.715  | -0.022 | 6         | 4.688  | 1.421  | -0.456 |
| 6          | 2.046  | 0.131  | 1.204  | 6         | 5.254  | -0.807 | 0.188  |
| 6          | 1.960  | -0.482 | -1.134 | 6         | 1.557  | -0.473 | 0.004  |
| 6          | 2.679  | -0.081 | -0.014 | 6         | -0.617 | 0.281  | 0.120  |
| 1          | -1.847 | -0.537 | 1.356  | 6         | -1.182 | -0.988 | -0.044 |
| 1          | -2.055 | 0.274  | -1.587 | 6         | 1.064  | -1.785 | -0.221 |
| 1          | -3.420 | 0.071  | -0.513 | 6         | -0.276 | -2.040 | -0.230 |
| 1          | -1.294 | -2.824 | 0.511  | 6         | -0.906 | 2.733  | 0.387  |
| 1          | -1.705 | -2.335 | -1.115 | 6         | -2.636 | -1.241 | -0.064 |
| 1          | 0.170  | 0.116  | 2.240  | 6         | -2.799 | 1.190  | 0.258  |
| 1          | 0.033  | -0.984 | -1.902 | 6         | -3.427 | -0.020 | 0.104  |
| 1          | -3.957 | -2.030 | -0.432 | 6         | -0.553 | 3.317  | -0.966 |
| 1          | -3.596 | -2.355 | 1.122  | 6         | -4.900 | 0.054  | 0.127  |
| 1          | 2.621  | 0.451  | 2.065  | 1         | 3.197  | 1.612  | 1.094  |
| 1          | 2.470  | -0.640 | -2.077 | 1         | 2.568  | 1.814  | -0.544 |
| 1          | -2.418 | 3.493  | -0.582 | 1         | 3.568  | -2.068 | 0.620  |
|            |        |        |        | 1         | 3.829  | -0.761 | 1.789  |
|            |        |        |        | 1         | 4.704  | 1.168  | -1.532 |
|            |        |        |        | 1         | 4.975  | 2.472  | -0.358 |
|            |        |        |        | 1         | 5.957  | -1.411 | 0.769  |
|            |        |        |        | 1         | 5.294  | -1.158 | -0.859 |
|            |        |        |        | 1         | 6.555  | 0.753  | 0.013  |
|            |        |        |        | 1         | -0.660 | -3.039 | -0.408 |
|            |        |        |        | 1         | -1.658 | 3.339  | 0.897  |
|            |        |        |        | 1         | -0.026 | 2.676  | 1.029  |
|            |        |        |        | 1         | -3.406 | 2.082  | 0.381  |
|            |        |        |        | 1         | 0.192  | 2.700  | -1.472 |
|            |        |        |        | 1         | -1.434 | 3.385  | -1.609 |
|            |        |        |        | 1         | -0.142 | 4.321  | -0.850 |
|            |        |        |        | 1         | -6.456 | -0.941 | 0.009  |
| Atovaquone |        |        |        | Carbidopa |        |        |        |
| 17         | -8.218 | -0.483 | 0.000  | 8         | -1.095 | 1.104  | 1.573  |
| 8          | 2.665  | -2.356 | 0.000  | 8         | -2.159 | 1.964  | -0.206 |
| 8          | 1.842  | 2.313  | -0.001 | 8         | 3.105  | 1.948  | -0.391 |
| 8          | 4.522  | 2.738  | 0.000  | 8         | 4.451  | -0.149 | 0.555  |
| 6          | 0.609  | -0.274 | 0.000  | 7         | -3.273 | -0.542 | -0.730 |
| 6          | -2.254 | 0.521  | 0.000  | 7         | -4.306 | -0.050 | 0.132  |
| 6          | -0.078 | 0.263  | -1.263 | 6         | -1.969 | -0.441 | -0.062 |
| 6          | -0.079 | 0.264  | 1.264  | 6         | -0.916 | -0.727 | -1.160 |
| 6          | -1.570 | -0.038 | -1.253 | 6         | 0.516  | -0.618 | -0.721 |
| 6          | -1.570 | -0.037 | 1.254  | 6         | -1.897 | -1.451 | 1.070  |
| 6          | 2.100  | -0.032 | 0.000  | 6         | -1.766 | 1.000  | 0.411  |
| 6          | -3.740 | 0.269  | 0.000  | 6         | 1.173  | 0.615  | -0.772 |
| 6          | 3.013  | -1.053 | 0.000  | 6         | 1.204  | -1.727 | -0.232 |
| 6          | 2.583  | 1.342  | 0.000  | 6         | 2.483  | 0.741  | -0.336 |
| 6          | -4.648 | 1.328  | -0.001 | 6         | 2.522  | -1.611 | 0.205  |
| 6          | -4.254 | -1.032 | 0.001  | 6         | 3.158  | -0.382 | 0.156  |
| 6          | 4.465  | -0.871 | 0.000  | 1         | -1.130 | -1.733 | -1.535 |

|   |            |        |        |    |            |        |        |
|---|------------|--------|--------|----|------------|--------|--------|
| 6 | 4.108      | 1.599  | 0.000  | 1  | -1.102     | -0.031 | -1.988 |
| 6 | 5.007      | 0.426  | 0.000  | 1  | -2.027     | -2.456 | 0.662  |
| 6 | -6.021     | 1.112  | -0.001 | 1  | -2.695     | -1.265 | 1.789  |
| 6 | -5.622     | -1.272 | 0.001  | 1  | -0.939     | -1.399 | 1.589  |
| 6 | 5.329      | -1.969 | 0.000  | 1  | -3.227     | 0.035  | -1.571 |
| 6 | -6.497     | -0.192 | 0.000  | 1  | 0.669      | 1.497  | -1.155 |
| 6 | 6.387      | 0.608  | 0.000  | 1  | 0.710      | -2.693 | -0.192 |
| 6 | 6.706      | -1.775 | 0.000  | 1  | 3.056      | -2.479 | 0.581  |
| 6 | 7.239      | -0.489 | 0.000  | 1  | -4.436     | 0.952  | -0.008 |
| 1 | 0.412      | -1.363 | 0.001  | 1  | -5.166     | -0.514 | -0.136 |
| 1 | -2.101     | 1.610  | 0.000  | 1  | -0.991     | 2.051  | 1.748  |
| 1 | 0.393      | -0.167 | -2.154 | 1  | 4.004      | 1.827  | -0.059 |
| 1 | 0.083      | 1.344  | -1.313 | 1  | 4.846      | -0.967 | 0.869  |
| 1 | 0.083      | 1.345  | 1.313  |    |            |        |        |
| 1 | 0.393      | -0.165 | 2.154  |    |            |        |        |
| 1 | -2.046     | 0.368  | -2.152 |    |            |        |        |
| 1 | -1.732     | -1.126 | -1.290 |    |            |        |        |
| 1 | -1.732     | -1.125 | 1.292  |    |            |        |        |
| 1 | -2.046     | 0.370  | 2.152  |    |            |        |        |
| 1 | -4.273     | 2.348  | -0.001 |    |            |        |        |
| 1 | -3.574     | -1.880 | 0.001  |    |            |        |        |
| 1 | -6.717     | 1.943  | -0.001 |    |            |        |        |
| 1 | -6.010     | -2.283 | 0.001  |    |            |        |        |
| 1 | 4.917      | -2.971 | 0.000  |    |            |        |        |
| 1 | 1.701      | -2.418 | 0.000  |    |            |        |        |
| 1 | 6.767      | 1.624  | 0.000  |    |            |        |        |
| 1 | 7.366      | -2.636 | 0.000  |    |            |        |        |
| 1 | 8.314      | -0.345 | 0.000  |    |            |        |        |
|   | Ergotamine |        |        |    | Cephalexin |        |        |
| 8 | 1.509      | 1.916  | 1.123  | 16 | 0.405      | 1.046  | -1.272 |
| 8 | 2.100      | 1.322  | -1.056 | 8  | 1.388      | -1.726 | 1.849  |
| 8 | 6.175      | 0.772  | -1.244 | 8  | -2.283     | -2.724 | -1.228 |
| 8 | 2.665      | -1.227 | 2.207  | 8  | 4.965      | 0.350  | 1.408  |
| 8 | -1.562     | 1.530  | 1.609  | 8  | 4.403      | -1.760 | 0.864  |
| 7 | 4.792      | 2.345  | -0.398 | 7  | 2.059      | -0.832 | -0.251 |
| 7 | 3.206      | 0.482  | 0.759  | 7  | -1.171     | -1.213 | 0.051  |
| 7 | 0.079      | -0.008 | 1.212  | 7  | -4.651     | -1.502 | -0.876 |
| 7 | -3.673     | -2.383 | 0.716  | 6  | 0.996      | -0.678 | -1.226 |
| 7 | -9.135     | -0.525 | -0.888 | 6  | 0.130      | -1.627 | -0.355 |
| 6 | 3.561      | 2.793  | 0.257  | 6  | 1.251      | -1.483 | 0.686  |
| 6 | 2.555      | 1.651  | 0.240  | 6  | 3.155      | 0.026  | -0.087 |
| 6 | 3.213      | 4.068  | -0.495 | 6  | 2.068      | 1.719  | -1.581 |
| 6 | 4.438      | -0.036 | 0.183  | 6  | 3.202      | 1.216  | -0.728 |
| 6 | 5.415      | 3.414  | -1.182 | 6  | -2.303     | -1.795 | -0.441 |
| 6 | 4.591      | 4.643  | -0.819 | 6  | 4.376      | 2.141  | -0.733 |
| 6 | 1.172      | 0.702  | 1.837  | 6  | 4.221      | -0.574 | 0.755  |
| 6 | 5.215      | 1.059  | -0.548 | 6  | -3.626     | -1.242 | 0.119  |
| 6 | 2.430      | -0.168 | 1.663  | 6  | -3.546     | 0.223  | 0.484  |
| 6 | 4.184      | -1.247 | -0.744 | 6  | -3.243     | 0.612  | 1.790  |
| 6 | 0.910      | 1.054  | 3.282  | 6  | -3.704     | 1.206  | -0.496 |
| 6 | -2.146     | -0.450 | 0.361  | 6  | -3.086     | 1.957  | 2.113  |
| 6 | -4.879     | -1.574 | 0.503  | 6  | -3.551     | 2.548  | -0.173 |
| 6 | -1.206     | 0.483  | 1.104  | 6  | -3.239     | 2.928  | 1.130  |
| 6 | 5.324      | -2.226 | -0.779 | 1  | 1.268      | -1.016 | -2.230 |
| 6 | -2.626     | -1.572 | 1.309  | 1  | 0.053      | -2.627 | -0.790 |
| 6 | -4.589     | -0.199 | -0.116 | 1  | -1.258     | -0.394 | 0.639  |
| 6 | -5.971     | -2.379 | -0.225 | 1  | 1.974      | 2.800  | -1.433 |
| 6 | -3.337     | 0.281  | -0.172 | 1  | 2.322      | 1.588  | -2.642 |
| 6 | -5.768     | 0.585  | -0.504 | 1  | 5.315      | 1.655  | -0.483 |
| 6 | -7.168     | -1.519 | -0.441 | 1  | 4.228      | 2.956  | -0.015 |
| 6 | -6.970     | -0.125 | -0.601 | 1  | 4.477      | 2.607  | -1.719 |
| 6 | -3.197     | -3.091 | -0.462 | 1  | -3.767     | -1.811 | 1.058  |
| 6 | 6.150      | -2.349 | -1.895 | 1  | -5.563     | -1.555 | -0.437 |
| 6 | 5.569      | -3.037 | 0.333  | 1  | -4.456     | -2.401 | -1.309 |
| 6 | -8.202     | 0.489  | -0.885 | 1  | 5.614      | -0.151 | 1.923  |
| 6 | -8.508     | -1.736 | -0.615 | 1  | -3.130     | -0.149 | 2.560  |
| 6 | -5.845     | 1.961  | -0.718 | 1  | -3.954     | 0.896  | -1.505 |
| 6 | -8.270     | 1.864  | -1.102 | 1  | -2.853     | 2.244  | 3.133  |
| 6 | 7.196      | -3.264 | -1.905 | 1  | -3.675     | 3.304  | -0.942 |
| 6 | 6.617      | -3.950 | 0.327  | 1  | -3.121     | 3.978  | 1.380  |
| 6 | -7.072     | 2.572  | -1.017 |    |            |        |        |
| 6 | 7.434      | -4.067 | -0.794 |    |            |        |        |
| 1 | 3.750      | 3.020  | 1.316  |    |            |        |        |
| 1 | 2.575      | 4.735  | 0.087  |    |            |        |        |
| 1 | 2.691      | 3.823  | -1.427 |    |            |        |        |
| 1 | 5.061      | -0.373 | 1.023  |    |            |        |        |
| 1 | 5.353      | 3.165  | -2.249 |    |            |        |        |
| 1 | 6.476      | 3.503  | -0.938 |    |            |        |        |
| 1 | 4.570      | 5.383  | -1.619 |    |            |        |        |
| 1 | 5.007      | 5.132  | 0.068  |    |            |        |        |
| 1 | 3.292      | -1.753 | -0.361 |    |            |        |        |
| 1 | 3.945      | -0.886 | -1.748 |    |            |        |        |
| 1 | 1.540      | 2.045  | -1.360 |    |            |        |        |
| 1 | 0.324      | -0.790 | 0.620  |    |            |        |        |

|    |             |        |        |   |           |        |        |
|----|-------------|--------|--------|---|-----------|--------|--------|
| 1  | 0.048       | 1.712  | 3.360  |   |           |        |        |
| 1  | 0.724       | 0.137  | 3.844  |   |           |        |        |
| 1  | 1.786       | 1.551  | 3.704  |   |           |        |        |
| 1  | -1.583      | -0.918 | -0.464 |   |           |        |        |
| 1  | -5.279      | -1.361 | 1.509  |   |           |        |        |
| 1  | -1.791      | -2.219 | 1.601  |   |           |        |        |
| 1  | -3.022      | -1.112 | 2.222  |   |           |        |        |
| 1  | -6.185      | -3.286 | 0.350  |   |           |        |        |
| 1  | -5.592      | -2.710 | -1.200 |   |           |        |        |
| 1  | -3.162      | 1.275  | -0.574 |   |           |        |        |
| 1  | -2.224      | -3.532 | -0.233 |   |           |        |        |
| 1  | -3.869      | -3.911 | -0.719 |   |           |        |        |
| 1  | -3.079      | -2.456 | -1.359 |   |           |        |        |
| 1  | 5.981       | -1.704 | -2.752 |   |           |        |        |
| 1  | 4.924       | -2.951 | 1.205  |   |           |        |        |
| 1  | -9.089      | -2.646 | -0.582 |   |           |        |        |
| 1  | -4.959      | 2.581  | -0.623 |   |           |        |        |
| -1 | 10.124      | -0.412 | -1.029 |   |           |        |        |
| 1  | -9.203      | 2.372  | -1.323 |   |           |        |        |
| 1  | 7.832       | -3.347 | -2.780 |   |           |        |        |
| 1  | 6.794       | -4.576 | 1.197  |   |           |        |        |
| 1  | -7.094      | 3.647  | -1.171 |   |           |        |        |
| 1  | 8.251       | -4.781 | -0.801 |   |           |        |        |
|    | Cervastatin |        |        |   | Alfuzosin |        |        |
| 9  | 3.888       | 5.196  | 0.327  | 8 | -3.302    | -3.018 | -0.217 |
| 8  | 4.731       | -1.231 | 0.688  | 8 | -4.554    | -0.787 | 0.788  |
| 8  | -2.011      | 3.742  | -1.108 | 8 | 4.614     | -2.105 | -0.184 |
| 8  | -4.002      | 1.079  | 1.444  | 8 | 2.165     | -3.124 | 0.377  |
| 8  | -7.355      | -1.003 | -0.073 | 7 | -2.567    | 0.203  | 1.301  |
| 8  | -5.434      | -1.345 | 1.036  | 7 | -0.712    | 3.338  | -0.373 |
| 7  | 0.680       | -2.532 | -0.172 | 7 | 0.183     | 1.236  | -0.012 |
| 6  | 1.992       | -2.353 | -0.333 | 7 | 1.586     | 3.131  | -0.496 |
| 6  | -0.125      | -1.484 | 0.018  | 7 | 3.850     | 2.970  | -0.769 |
| 6  | 2.580       | -1.079 | -0.314 | 6 | -2.523    | -1.879 | 0.055  |
| 6  | 0.361       | -0.165 | 0.039  | 6 | -2.044    | -1.406 | -1.318 |
| 6  | 1.747       | 0.031  | -0.100 | 6 | -3.313    | -1.612 | -2.142 |
| 6  | -1.587      | -1.821 | 0.237  | 6 | -3.968    | -2.825 | -1.473 |
| 6  | 2.787       | -3.632 | -0.494 | 6 | -3.335    | -0.781 | 0.755  |
| 6  | 4.053       | -0.915 | -0.522 | 6 | -3.156    | 1.442  | 1.786  |
| 6  | 2.313       | 1.400  | 0.001  | 6 | -2.225    | 2.601  | 1.480  |
| 6  | -0.539      | 0.982  | 0.281  | 6 | -2.011    | 2.791  | -0.026 |
| 6  | -2.338      | 2.611  | -0.288 | 6 | 0.390     | 2.526  | -0.287 |
| 6  | -1.753      | -2.994 | 1.198  | 6 | -0.581    | 4.779  | -0.391 |
| 6  | -2.266      | -2.122 | -1.100 | 6 | 2.586     | 0.949  | -0.297 |
| 6  | 2.658       | -4.478 | 0.772  | 6 | 1.290     | 0.444  | -0.028 |
| 6  | 2.317       | -4.406 | -1.723 | 6 | 2.656     | 2.359  | -0.507 |
| 6  | -3.796      | 2.293  | -0.585 | 6 | 3.688     | 0.071  | -0.313 |
| 6  | -1.432      | 1.460  | -0.586 | 6 | 1.145     | -0.937 | 0.224  |
| 6  | -4.244      | 0.990  | 0.046  | 6 | 3.536     | -1.272 | -0.073 |
| 6  | 1.919       | 2.416  | -0.876 | 6 | 2.233     | -1.786 | 0.193  |
| 6  | 3.259       | 1.699  | 0.988  | 6 | 5.035     | -2.717 | 1.030  |
| 6  | -5.707      | 0.682  | -0.242 | 6 | 0.884     | -3.688 | 0.602  |
| 6  | 2.450       | 3.697  | -0.778 | 1 | -1.707    | -2.196 | 0.717  |
| 6  | 3.792       | 2.977  | 1.108  | 1 | -1.663    | -0.381 | -1.322 |
| 6  | 3.374       | 3.954  | 0.221  | 1 | -1.237    | -2.060 | -1.666 |
| 6  | 6.122       | -1.074 | 0.551  | 1 | -3.110    | -1.774 | -3.202 |
| 6  | -6.115      | -0.649 | 0.316  | 1 | -3.961    | -0.735 | -2.060 |
| 1  | -2.072      | -0.943 | 0.677  | 1 | -3.841    | -3.747 | -2.051 |
| 1  | 3.845       | -3.382 | -0.618 | 1 | -5.037    | -2.668 | -1.295 |
| 1  | 4.413       | -1.575 | -1.328 | 1 | -3.350    | 1.379  | 2.863  |
| 1  | 4.296       | 0.113  | -0.828 | 1 | -4.133    | 1.562  | 1.303  |
| 1  | -0.462      | 1.470  | 1.256  | 1 | -1.252    | 2.407  | 1.948  |
| 1  | -2.235      | 2.871  | 0.775  | 1 | -2.610    | 3.518  | 1.939  |
| 1  | -4.423      | 3.122  | -0.239 | 1 | -1.587    | 0.264  | 1.026  |
| 1  | -3.921      | 2.228  | -1.673 | 1 | -2.122    | 1.830  | -0.536 |
| 1  | -1.302      | -3.900 | 0.785  | 1 | -2.770    | 3.461  | -0.443 |
| 1  | -1.272      | -2.796 | 2.160  | 1 | -1.435    | 5.207  | -0.921 |
| 1  | -2.813      | -3.186 | 1.382  | 1 | 0.336     | 5.063  | -0.901 |
| 1  | -1.789      | -2.980 | -1.584 | 1 | -0.556    | 5.208  | 0.621  |
| 1  | -2.201      | -1.275 | -1.790 | 1 | 4.689     | 0.420  | -0.546 |
| 1  | -3.323      | -2.361 | -0.951 | 1 | 0.149     | -1.314 | 0.417  |
| 1  | 3.225       | -5.408 | 0.677  | 1 | 3.838     | 3.977  | -0.706 |
| 1  | 3.034       | -3.940 | 1.647  | 1 | 4.698     | 2.526  | -0.456 |
| 1  | 1.610       | -4.731 | 0.953  | 1 | 5.332     | -1.959 | 1.764  |
| 1  | 2.442       | -3.824 | -2.641 | 1 | 4.254     | -3.352 | 1.456  |
| 1  | 2.879       | -5.337 | -1.836 | 1 | 5.901     | -3.330 | 0.779  |
| 1  | 1.257       | -4.656 | -1.629 | 1 | 0.210     | -3.499 | -0.241 |
| 1  | -1.512      | 1.025  | -1.585 | 1 | 1.039     | -4.760 | 0.707  |
| 1  | -3.637      | 0.171  | -0.375 | 1 | 0.430     | -3.294 | 1.519  |
| 1  | 1.198       | 2.196  | -1.657 |   |           |        |        |
| 1  | 3.584       | 0.913  | 1.663  |   |           |        |        |
| 1  | -5.918      | 0.691  | -1.317 |   |           |        |        |
| 1  | -6.355      | 1.449  | 0.199  |   |           |        |        |
| 1  | 2.165       | 4.486  | -1.464 |   |           |        |        |

|   |               |        |        |    |              |        |        |
|---|---------------|--------|--------|----|--------------|--------|--------|
| 1 | 4.519         | 3.221  | 1.874  |    |              |        |        |
| 1 | -1.109        | 3.997  | -0.891 |    |              |        |        |
| 1 | -4.180        | 0.201  | 1.803  |    |              |        |        |
| 1 | 6.528         | -1.729 | -0.235 |    |              |        |        |
| 1 | 6.388         | -0.035 | 0.304  |    |              |        |        |
| 1 | 6.580         | -1.341 | 1.504  |    |              |        |        |
| 1 | -7.546        | -1.858 | 0.340  |    |              |        |        |
|   | Disopyramide  |        |        |    | Clofibrate   |        |        |
| 8 | 0.773         | -1.031 | -2.363 | 17 | -4.603       | 0.832  | 0.340  |
| 7 | -2.246        | -0.563 | 0.359  | 8  | 0.745        | -1.182 | -1.091 |
| 7 | 2.937         | -1.113 | 1.173  | 8  | 2.398        | 0.874  | -0.116 |
| 7 | 1.065         | -2.620 | -0.774 | 8  | 1.821        | 0.045  | 1.896  |
| 6 | 0.937         | -0.301 | -0.028 | 6  | 1.737        | -1.412 | -0.055 |
| 6 | 0.166         | -0.796 | 1.228  | 6  | 1.289        | -2.487 | 0.916  |
| 6 | -1.249        | -1.369 | 1.071  | 6  | 2.983        | -1.822 | -0.818 |
| 6 | -3.106        | -1.374 | -0.536 | 6  | 1.981        | -0.100 | 0.709  |
| 6 | -3.039        | 0.309  | 1.258  | 6  | -0.489       | -0.715 | -0.701 |
| 6 | 0.441         | 1.097  | -0.399 | 6  | 2.589        | 2.165  | 0.504  |
| 6 | 2.456         | -0.269 | 0.255  | 6  | -0.744       | 0.656  | -0.712 |
| 6 | 0.892         | -1.324 | -1.190 | 6  | -1.513       | -1.607 | -0.387 |
| 6 | -4.183        | -0.519 | -1.198 | 6  | -2.008       | 1.135  | -0.391 |
| 6 | -2.310        | -2.050 | -1.646 | 6  | -2.779       | -1.135 | -0.065 |
| 6 | -4.046        | -0.443 | 2.132  | 6  | 2.964        | 3.136  | -0.580 |
| 6 | -2.165        | 1.198  | 2.128  | 6  | -3.015       | 0.235  | -0.064 |
| 6 | 0.885         | 2.175  | 0.375  | 1  | 2.076        | -2.686 | 1.644  |
| 6 | -0.515        | 1.352  | -1.383 | 1  | 0.403        | -2.183 | 1.474  |
| 6 | 3.298         | 0.531  | -0.526 | 1  | 1.075        | -3.409 | 0.370  |
| 6 | 0.404         | 3.463  | 0.175  | 1  | 3.821        | -1.973 | -0.133 |
| 6 | -1.002        | 2.640  | -1.585 | 1  | 2.797        | -2.759 | -1.345 |
| 6 | 4.666         | 0.480  | -0.311 | 1  | 3.256        | -1.057 | -1.544 |
| 6 | -0.547        | 3.702  | -0.811 | 1  | 1.662        | 2.442  | 1.017  |
| 6 | 4.257         | -1.146 | 1.378  | 1  | 3.363        | 2.072  | 1.273  |
| 6 | 5.163         | -0.368 | 0.673  | 1  | 0.050        | 1.337  | -0.996 |
| 1 | 0.173         | 0.036  | 1.937  | 1  | -1.315       | -2.673 | -0.409 |
| 1 | 0.761         | -1.575 | 1.713  | 1  | -2.217       | 2.199  | -0.402 |
| 1 | -1.593        | -1.621 | 2.090  | 1  | -3.581       | -1.822 | 0.178  |
| 1 | -1.162        | -2.332 | 0.566  | 1  | 3.115        | 4.131  | -0.155 |
| 1 | -3.612        | -2.173 | 0.045  | 1  | 3.887        | 2.837  | -1.079 |
| 1 | -3.595        | 0.983  | 0.597  | 1  | 2.178        | 3.207  | -1.335 |
| 1 | -4.954        | -0.170 | -0.509 |    |              |        |        |
| 1 | -4.684        | -1.101 | -1.974 |    |              |        |        |
| 1 | -3.731        | 0.356  | -1.676 |    |              |        |        |
| 1 | -2.982        | -2.671 | -2.244 |    |              |        |        |
| 1 | -1.859        | -1.311 | -2.314 |    |              |        |        |
| 1 | -1.511        | -2.698 | -1.287 |    |              |        |        |
| 1 | -4.764        | -1.021 | 1.546  |    |              |        |        |
| 1 | -4.615        | 0.261  | 2.746  |    |              |        |        |
| 1 | -3.545        | -1.134 | 2.818  |    |              |        |        |
| 1 | -1.653        | 0.629  | 2.910  |    |              |        |        |
| 1 | -2.792        | 1.936  | 2.635  |    |              |        |        |
| 1 | -1.421        | 1.734  | 1.540  |    |              |        |        |
| 1 | 1.615         | 2.002  | 1.163  |    |              |        |        |
| 1 | -0.887        | 0.541  | -1.992 |    |              |        |        |
| 1 | 2.875         | 1.177  | -1.287 |    |              |        |        |
| 1 | 1.304         | -3.279 | -1.500 |    |              |        |        |
| 1 | 1.486         | -2.780 | 0.133  |    |              |        |        |
| 1 | 0.767         | 4.277  | 0.796  |    |              |        |        |
| 1 | -1.747        | 2.811  | -2.356 |    |              |        |        |
| 1 | 5.336         | 1.090  | -0.907 |    |              |        |        |
| 1 | -0.930        | 4.704  | -0.974 |    |              |        |        |
| 1 | 4.601         | -1.840 | 2.142  |    |              |        |        |
| 1 | 6.225         | -0.435 | 0.880  |    |              |        |        |
|   | Diphenoxylate |        |        |    | Carphenazine |        |        |
| 8 | 4.398         | -1.735 | -0.779 | 16 | 4.555        | 1.359  | -1.048 |
| 8 | 5.024         | -1.669 | 1.382  | 8  | -7.540       | 0.058  | -0.999 |
| 7 | 0.124         | -0.722 | 1.695  | 8  | -1.871       | 2.069  | 0.747  |
| 7 | -4.013        | 2.085  | 2.299  | 7  | -1.643       | -2.275 | 0.292  |
| 6 | 2.926         | -0.634 | 0.723  | 7  | -4.413       | -1.672 | -0.177 |
| 6 | 2.537         | -0.718 | 2.209  | 7  | 2.284        | -0.575 | -0.349 |
| 6 | 1.773         | -1.271 | -0.065 | 6  | -2.595       | -3.306 | -0.098 |
| 6 | 1.188         | -0.079 | 2.467  | 6  | -2.345       | -1.248 | 1.056  |
| 6 | 0.433         | -0.638 | 0.268  | 6  | -3.713       | -2.707 | -0.924 |
| 6 | -1.141        | -0.058 | 1.991  | 6  | -3.460       | -0.644 | 0.232  |
| 6 | 3.241         | 0.807  | 0.294  | 6  | -0.516       | -2.834 | 1.024  |
| 6 | 4.225         | -1.409 | 0.515  | 6  | 0.668        | -1.880 | 1.095  |
| 6 | -2.364        | -0.765 | 1.398  | 6  | -5.504       | -1.127 | -0.968 |
| 6 | -3.326        | 0.180  | 0.626  | 6  | 1.175        | -1.525 | -0.303 |
| 6 | 2.739         | 1.375  | -0.879 | 6  | -6.430       | -0.238 | -0.163 |
| 6 | 4.112         | 1.577  | 1.073  | 6  | 1.975        | 0.792  | -0.238 |
| 6 | -2.583        | 0.768  | -0.585 | 6  | 3.585        | -1.062 | -0.127 |
| 6 | -4.609        | -0.524 | 0.162  | 6  | 2.952        | 1.785  | -0.472 |
| 6 | 3.065         | 2.677  | -1.242 | 6  | 4.716        | -0.253 | -0.345 |
| 6 | 4.445         | 2.877  | 0.709  | 6  | 0.685        | 1.227  | 0.067  |
| 6 | -3.717        | 1.252  | 1.550  | 6  | 3.814        | -2.381 | 0.290  |

|   |             |        |        |    |           |        |        |
|---|-------------|--------|--------|----|-----------|--------|--------|
| 6 | 3.915       | 3.437  | -0.448 | 6  | 0.354     | 2.584  | 0.149  |
| 6 | 5.644       | -2.394 | -1.090 | 6  | 2.634     | 3.136  | -0.361 |
| 6 | -2.050      | 2.056  | -0.580 | 6  | 5.999     | -0.734 | -0.110 |
| 6 | -4.763      | -1.908 | 0.205  | 6  | 1.343     | 3.545  | -0.062 |
| 6 | -2.360      | -0.050 | -1.694 | 6  | 5.103     | -2.868 | 0.483  |
| 6 | -5.644      | 0.252  | -0.365 | 6  | 6.204     | -2.047 | 0.297  |
| 6 | 5.663       | -2.655 | -2.570 | 6  | -1.051    | 2.936  | 0.486  |
| 6 | -1.283      | 2.508  | -1.651 | 6  | -1.443    | 4.399  | 0.500  |
| 6 | -5.929      | -2.504 | -0.272 | 6  | -2.905    | 4.623  | 0.822  |
| 6 | -1.591      | 0.397  | -2.760 | 1  | -3.025    | -3.811 | 0.789  |
| 6 | -6.807      | -0.339 | -0.836 | 1  | -2.067    | -4.067 | -0.685 |
| 6 | -1.043      | 1.678  | -2.739 | 1  | -1.653    | -0.451 | 1.340  |
| 6 | -6.953      | -1.724 | -0.792 | 1  | -2.763    | -1.676 | 1.989  |
| 1 | 3.299       | -0.258 | 2.839  | 1  | -4.431    | -3.487 | -1.199 |
| 1 | 2.501       | -1.775 | 2.495  | 1  | -3.288    | -2.304 | -1.866 |
| 1 | 1.734       | -2.336 | 0.191  | 1  | -3.024    | -0.127 | -0.646 |
| 1 | 1.951       | -1.223 | -1.142 | 1  | -3.969    | 0.117  | 0.828  |
| 1 | 0.932       | -0.161 | 3.529  | 1  | -0.809    | -3.148 | 2.045  |
| 1 | 1.237       | 1.005  | 2.236  | 1  | -0.207    | -3.748 | 0.500  |
| 1 | -0.348      | -1.151 | -0.297 | 1  | 0.399     | -0.970 | 1.640  |
| 1 | 0.409       | 0.418  | -0.066 | 1  | 1.463     | -2.343 | 1.687  |
| 1 | -1.105      | 0.996  | 1.649  | 1  | -6.097    | -1.963 | -1.355 |
| 1 | -1.240      | -0.007 | 3.080  | 1  | -5.137    | -0.566 | -1.850 |
| 1 | -2.043      | -1.548 | 0.706  | 1  | 0.354     | -1.116 | -0.895 |
| 1 | -2.931      | -1.267 | 2.187  | 1  | 1.494     | -2.430 | -0.829 |
| 1 | 2.079       | 0.806  | -1.525 | 1  | -6.739    | -0.769 | 0.749  |
| 1 | 4.549       | 1.149  | 1.970  | 1  | -5.919    | 0.685  | 0.145  |
| 1 | 2.649       | 3.097  | -2.154 | 1  | -0.122    | 0.526  | 0.231  |
| 1 | 5.122       | 3.451  | 1.333  | 1  | 2.982     | -3.049 | 0.461  |
| 1 | 4.168       | 4.454  | -0.731 | 1  | 3.415     | 3.870  | -0.535 |
| 1 | 5.709       | -3.314 | -0.501 | 1  | 6.843     | -0.071 | -0.276 |
| 1 | 6.467       | -1.749 | -0.767 | 1  | -8.103    | 0.682  | -0.537 |
| 1 | -2.228      | 2.710  | 0.269  | 1  | 1.121     | 4.604  | 0.005  |
| 1 | -3.979      | -2.538 | 0.610  | 1  | 5.233     | -3.899 | 0.795  |
| 1 | -2.786      | -1.051 | -1.717 | 1  | 7.210     | -2.417 | 0.459  |
| 1 | -5.533      | 1.333  | -0.402 | 1  | -1.179    | 4.835  | -0.472 |
| 1 | 5.594       | -1.723 | -3.135 | 1  | -0.797    | 4.918  | 1.221  |
| 1 | 4.833       | -3.298 | -2.869 | 1  | -3.160    | 4.212  | 1.800  |
| 1 | 6.594       | -3.153 | -2.850 | 1  | -3.148    | 5.687  | 0.824  |
| 1 | -0.867      | 3.510  | -1.626 | 1  | -3.548    | 4.127  | 0.092  |
| 1 | -6.034      | -3.583 | -0.231 |    |           |        |        |
| 1 | -1.422      | -0.254 | -3.612 |    |           |        |        |
| 1 | -7.602      | 0.280  | -1.237 |    |           |        |        |
| 1 | -0.441      | 2.027  | -3.572 |    |           |        |        |
| 1 | -7.862      | -2.189 | -1.159 |    |           |        |        |
|   | Anileridine |        |        |    | Estazolam |        |        |
| 8 | -2.650      | 1.972  | -0.140 | 17 | 1.199     | 4.171  | -0.464 |
| 8 | -2.441      | 1.234  | 1.974  | 7  | -2.384    | -0.462 | 0.371  |
| 7 | 0.659       | -0.807 | 0.051  | 7  | -0.233    | -1.904 | -1.145 |
| 7 | 8.441       | 0.250  | 0.436  | 7  | -3.498    | -2.309 | -0.095 |
| 6 | -2.259      | -0.362 | 0.142  | 7  | -4.043    | -1.747 | 1.044  |
| 6 | -1.424      | -0.277 | -1.139 | 6  | -1.505    | 0.624  | 0.192  |
| 6 | -1.511      | -1.281 | 1.123  | 6  | -0.194    | 0.409  | -0.271 |
| 6 | 0.008       | 0.138  | -0.849 | 6  | 0.370     | -0.949 | -0.534 |
| 6 | -0.066      | -0.858 | 1.317  | 6  | -2.519    | -1.535 | -0.482 |
| 6 | -3.677      | -0.885 | -0.093 | 6  | -1.591    | -1.687 | -1.626 |
| 6 | 2.055       | -0.466 | 0.285  | 6  | 1.755     | -1.215 | -0.068 |
| 6 | -2.435      | 1.018  | 0.785  | 6  | -1.955    | 1.914  | 0.480  |
| 6 | 2.953       | -0.653 | -0.936 | 6  | 0.624     | 1.529  | -0.466 |
| 6 | -4.162      | -1.200 | -1.363 | 6  | -3.380    | -0.653 | 1.298  |
| 6 | -4.532      | -1.051 | 1.003  | 6  | -1.128    | 3.008  | 0.295  |
| 6 | 4.398       | -0.420 | -0.598 | 6  | 0.159     | 2.805  | -0.196 |
| 6 | -5.456      | -1.685 | -1.531 | 6  | 2.294     | -0.568 | 1.050  |
| 6 | -5.824      | -1.531 | 0.836  | 6  | 2.530     | -2.175 | -0.730 |
| 6 | -6.292      | -1.854 | -0.435 | 6  | 3.574     | -0.873 | 1.495  |
| 6 | -2.908      | 3.293  | 0.382  | 6  | 3.812     | -2.469 | -0.292 |
| 6 | 4.961       | 0.856  | -0.660 | 6  | 4.339     | -1.819 | 0.822  |
| 6 | 5.216       | -1.461 | -0.153 | 1  | -1.904    | -2.545 | -2.222 |
| 6 | -3.125      | 4.209  | -0.790 | 1  | -1.646    | -0.791 | -2.265 |
| 6 | 6.281       | 1.088  | -0.300 | 1  | -2.972    | 2.055  | 0.828  |
| 6 | 6.538       | -1.245 | 0.209  | 1  | 1.638     | 1.390  | -0.825 |
| 6 | 7.093       | 0.038  | 0.142  | 1  | -3.542    | 0.012  | 2.133  |
| 1 | -1.873      | 0.420  | -1.851 | 1  | -1.479    | 4.010  | 0.508  |
| 1 | -1.409      | -1.267 | -1.608 | 1  | 1.701     | 0.165  | 1.588  |
| 1 | -2.018      | -1.289 | 2.090  | 1  | 2.101     | -2.682 | -1.587 |
| 1 | -1.546      | -2.299 | 0.721  | 1  | 3.974     | -0.372 | 2.371  |
| 1 | 0.027       | 1.165  | -0.423 | 1  | 4.406     | -3.207 | -0.821 |
| 1 | 0.569       | 0.181  | -1.786 | 1  | 5.342     | -2.052 | 1.164  |
| 1 | 0.444       | -1.571 | 1.973  |    |           |        |        |
| 1 | -0.034      | 0.124  | 1.831  |    |           |        |        |
| 1 | 2.161       | 0.572  | 0.663  |    |           |        |        |
| 1 | 2.421       | -1.117 | 1.089  |    |           |        |        |
| 1 | 2.651       | 0.032  | -1.735 |    |           |        |        |
| 1 | 2.806       | -1.668 | -1.322 |    |           |        |        |

|    |                   |        |        |    |               |        |        |
|----|-------------------|--------|--------|----|---------------|--------|--------|
| 1  | -3.532            | -1.071 | -2.236 |    |               |        |        |
| 1  | -4.180            | -0.787 | 1.996  |    |               |        |        |
| 1  | -5.811            | -1.929 | -2.528 |    |               |        |        |
| 1  | -6.469            | -1.652 | 1.700  |    |               |        |        |
| 1  | -7.300            | -2.232 | -0.567 |    |               |        |        |
| 1  | -2.056            | 3.595  | 0.999  |    |               |        |        |
| 1  | -3.780            | 3.241  | 1.042  |    |               |        |        |
| 1  | 4.351             | 1.690  | -1.001 |    |               |        |        |
| 1  | 4.807             | -2.467 | -0.091 |    |               |        |        |
| 1  | -3.975            | 3.884  | -1.393 |    |               |        |        |
| 1  | -2.244            | 4.243  | -1.434 |    |               |        |        |
| 1  | -3.327            | 5.223  | -0.439 |    |               |        |        |
| 1  | 6.696             | 2.091  | -0.368 |    |               |        |        |
| 1  | 7.154             | -2.077 | 0.541  |    |               |        |        |
| 1  | 8.840             | -0.423 | 1.075  |    |               |        |        |
| 1  | 8.662             | 1.192  | 0.724  |    |               |        |        |
|    | Diazoxide         |        |        |    | Entacapone    |        |        |
| 17 | 4.136             | -0.274 | -0.001 | 8  | -2.793        | 1.679  | -1.044 |
| 16 | -1.185            | -1.377 | 0.000  | 8  | 3.220         | -2.893 | -0.177 |
| 8  | -1.133            | -2.104 | -1.252 | 8  | 5.002         | -1.005 | 0.070  |
| 8  | -1.136            | -2.101 | 1.255  | 8  | 3.839         | 2.855  | 0.631  |
| 7  | -1.459            | 1.630  | 0.001  | 8  | 5.411         | 1.595  | -0.184 |
| 7  | -2.570            | -0.464 | -0.002 | 7  | -3.991        | 0.142  | 0.117  |
| 6  | 0.140             | -0.185 | 0.000  | 7  | 4.264         | 1.798  | 0.180  |
| 6  | -0.142            | 1.182  | 0.001  | 7  | -1.685        | -2.766 | -0.576 |
| 6  | -2.568            | 0.825  | -0.001 | 6  | -5.192        | 0.958  | -0.110 |
| 6  | 1.454             | -0.642 | -0.001 | 6  | -4.051        | -0.801 | 1.235  |
| 6  | 0.916             | 2.095  | 0.001  | 6  | -2.836        | 0.621  | -0.432 |
| 6  | 2.489             | 0.279  | 0.000  | 6  | -5.761        | 0.759  | -1.501 |
| 6  | 2.225             | 1.649  | 0.001  | 6  | -3.967        | -0.109 | 2.585  |
| 6  | -3.874            | 1.550  | -0.001 | 6  | 0.968         | 0.042  | -0.149 |
| 1  | -1.608            | 2.628  | 0.001  | 6  | -1.573        | -0.203 | -0.307 |
| 1  | 1.657             | -1.707 | -0.001 | 6  | -0.404        | 0.485  | -0.218 |
| 1  | 0.707             | 3.161  | 0.002  | 6  | 1.951         | 1.024  | -0.008 |
| 1  | 3.046             | 2.355  | 0.001  | 6  | 1.385         | -1.306 | -0.210 |
| 1  | -3.969            | 2.180  | 0.888  | 6  | 3.299         | 0.696  | 0.050  |
| 1  | -4.689            | 0.832  | -0.011 | 6  | 2.720         | -1.623 | -0.140 |
| 1  | -3.961            | 2.197  | -0.879 | 6  | 3.723         | -0.636 | -0.014 |
|    |                   |        |        | 6  | -1.633        | -1.610 | -0.439 |
|    |                   |        |        | 1  | -4.943        | 2.011  | 0.054  |
|    |                   |        |        | 1  | -5.922        | 0.670  | 0.651  |
|    |                   |        |        | 1  | -3.258        | -1.541 | 1.139  |
|    |                   |        |        | 1  | -4.989        | -1.358 | 1.139  |
|    |                   |        |        | 1  | -5.036        | 1.060  | -2.258 |
|    |                   |        |        | 1  | -6.026        | -0.287 | -1.672 |
|    |                   |        |        | 1  | -6.660        | 1.363  | -1.636 |
|    |                   |        |        | 1  | -3.011        | 0.408  | 2.699  |
|    |                   |        |        | 1  | -4.763        | 0.631  | 2.709  |
|    |                   |        |        | 1  | -4.058        | -0.834 | 3.396  |
|    |                   |        |        | 1  | -0.537        | 1.566  | -0.201 |
|    |                   |        |        | 1  | 1.684         | 2.072  | 0.058  |
|    |                   |        |        | 1  | 0.663         | -2.107 | -0.315 |
|    |                   |        |        | 1  | 2.506         | -3.531 | -0.269 |
|    |                   |        |        | 1  | 5.024         | -1.973 | 0.040  |
|    | Cycloserine       |        |        |    | Chlorzoxazone |        |        |
| 8  | -1.763            | -0.359 | 0.115  | 17 | 3.458         | -0.512 | 0.000  |
| 8  | 0.957             | 1.796  | 0.026  | 8  | -2.172        | 0.972  | 0.000  |
| 7  | -1.145            | 0.874  | -0.240 | 8  | -3.946        | -0.467 | 0.000  |
| 7  | 1.777             | -0.974 | -0.273 | 7  | -1.732        | -1.200 | 0.000  |
| 6  | 0.540             | -0.595 | 0.373  | 6  | -0.507        | -0.557 | 0.000  |
| 6  | -0.709            | -1.303 | -0.130 | 6  | -0.813        | 0.803  | 0.000  |
| 6  | 0.193             | 0.856  | 0.064  | 6  | 0.802         | -1.003 | 0.000  |
| 1  | 0.569             | -0.650 | 1.476  | 6  | 0.160         | 1.776  | 0.000  |
| 1  | -0.614            | -1.505 | -1.205 | 6  | 1.788         | -0.014 | 0.000  |
| 1  | -0.988            | -2.212 | 0.402  | 6  | -2.766        | -0.283 | 0.000  |
| 1  | -1.743            | 1.655  | -0.009 | 6  | 1.489         | 1.346  | 0.000  |
| 1  | 2.268             | -1.677 | 0.265  | 1  | -1.905        | -2.191 | 0.000  |
| 1  | 2.382             | -0.156 | -0.306 | 1  | 1.063         | -2.054 | 0.000  |
|    |                   |        |        | 1  | -0.093        | 2.829  | 0.000  |
|    |                   |        |        | 1  | 2.296         | 2.068  | 0.000  |
|    | estradiol acetate |        |        |    | Armodafinil   |        |        |
| 8  | -5.789            | -1.084 | 0.602  | 16 | -0.783        | -1.147 | 0.405  |
| 8  | 5.058             | -0.507 | -0.321 | 8  | -0.651        | -2.520 | -0.210 |
| 8  | 5.226             | 0.832  | 1.508  | 8  | -4.549        | -0.684 | 0.533  |
| 6  | -3.446            | -0.519 | 0.270  | 7  | -3.503        | -2.537 | -0.284 |
| 6  | -2.781            | 0.694  | -0.402 | 6  | 0.421         | -0.038 | -0.543 |
| 6  | -1.285            | 0.758  | -0.150 | 6  | 1.824         | -0.495 | -0.242 |
| 6  | -0.638            | -0.527 | -0.699 | 6  | 0.126         | 1.404  | -0.252 |
| 6  | -4.898            | -0.261 | -0.137 | 6  | -2.325        | -0.419 | -0.302 |
| 6  | -2.820            | -1.791 | -0.292 | 6  | 2.736         | -0.593 | -1.295 |
| 6  | -3.673            | 1.874  | -0.010 | 6  | -0.413        | 2.216  | -1.254 |
| 6  | -1.299            | -1.789 | -0.125 | 6  | 2.256         | -0.801 | 1.050  |
| 6  | -5.087            | 1.255  | 0.086  | 6  | 0.333         | 1.953  | 1.017  |
| 6  | -0.610            | 1.969  | -0.776 | 6  | 4.053         | -0.968 | -1.062 |

|           |        |        |        |           |        |        |        |
|-----------|--------|--------|--------|-----------|--------|--------|--------|
| 6         | -3.336 | -0.494 | 1.797  | 6         | -0.733 | 3.543  | -0.999 |
| 6         | 0.873  | -0.499 | -0.553 | 6         | 3.572  | -1.182 | 1.284  |
| 6         | 0.845  | 2.042  | -0.346 | 6         | 0.006  | 3.278  | 1.275  |
| 6         | 1.564  | 0.718  | -0.418 | 6         | 4.476  | -1.261 | 0.230  |
| 6         | 1.622  | -1.680 | -0.589 | 6         | -0.527 | 4.078  | 0.268  |
| 6         | 2.957  | 0.722  | -0.318 | 6         | -3.570 | -1.222 | 0.051  |
| 6         | 3.005  | -1.679 | -0.485 | 1         | 0.187  | -0.262 | -1.590 |
| 6         | 3.664  | -0.467 | -0.344 | 1         | -2.435 | 0.593  | 0.087  |
| 6         | 5.744  | 0.184  | 0.640  | 1         | -2.184 | -0.389 | -1.388 |
| 6         | 7.213  | -0.011 | 0.433  | 1         | 2.406  | -0.371 | -2.306 |
| 1         | -2.907 | 0.541  | -1.489 | 1         | -0.580 | 1.798  | -2.244 |
| 1         | -1.108 | 0.800  | 0.938  | 1         | 1.556  | -0.767 | 1.880  |
| 1         | -0.858 | -0.525 | -1.783 | 1         | 0.759  | 1.341  | 1.806  |
| 1         | -4.992 | -0.493 | -1.212 | 1         | 4.748  | -1.038 | -1.892 |
| 1         | -3.063 | -1.858 | -1.363 | 1         | -1.144 | 4.161  | -1.791 |
| 1         | -3.252 | -2.680 | 0.180  | 1         | 3.889  | -1.426 | 2.292  |
| 1         | -3.620 | 2.693  | -0.731 | 1         | 0.170  | 3.689  | 2.265  |
| 1         | -3.360 | 2.290  | 0.954  | 1         | 5.502  | -1.561 | 0.414  |
| 1         | -1.028 | -1.885 | 0.934  | 1         | -0.780 | 5.113  | 0.471  |
| 1         | -0.894 | -2.680 | -0.613 | 1         | -4.263 | -3.125 | 0.021  |
| 1         | -5.529 | 1.412  | 1.074  | 1         | -2.597 | -2.961 | -0.463 |
| 1         | -5.782 | 1.687  | -0.640 |           |        |        |        |
| 1         | -1.129 | 2.892  | -0.497 |           |        |        |        |
| 1         | -0.684 | 1.892  | -1.870 |           |        |        |        |
| 1         | -3.906 | -1.322 | 2.223  |           |        |        |        |
| 1         | -2.303 | -0.588 | 2.136  |           |        |        |        |
| 1         | -3.738 | 0.427  | 2.227  |           |        |        |        |
| 1         | 0.895  | 2.402  | 0.692  |           |        |        |        |
| 1         | 1.392  | 2.787  | -0.934 |           |        |        |        |
| 1         | -6.680 | -0.928 | 0.280  |           |        |        |        |
| 1         | 1.117  | -2.633 | -0.703 |           |        |        |        |
| 1         | 3.483  | 1.663  | -0.209 |           |        |        |        |
| 1         | 3.576  | -2.600 | -0.516 |           |        |        |        |
| 1         | 7.465  | -1.070 | 0.512  |           |        |        |        |
| 1         | 7.769  | 0.554  | 1.176  |           |        |        |        |
| 1         | 7.500  | 0.310  | -0.570 |           |        |        |        |
| Efavirenz |        |        |        | Atenolol  |        |        |        |
| 17        | -2.714 | 3.498  | 0.187  | 8         | 0.959  | -1.007 | 0.327  |
| 9         | 0.496  | -0.047 | 2.313  | 8         | 2.926  | -3.061 | 0.446  |
| 9         | -0.333 | -1.997 | 1.852  | 8         | -6.556 | 0.576  | -0.068 |
| 9         | 1.802  | -1.671 | 1.723  | 7         | 3.974  | 0.393  | -0.409 |
| 8         | 0.591  | -1.912 | -0.752 | 7         | -5.049 | -1.085 | 0.246  |
| 8         | -0.244 | -3.876 | -1.381 | 6         | 3.777  | -0.778 | 0.431  |
| 7         | -1.706 | -2.231 | -0.812 | 6         | 3.069  | -1.888 | -0.340 |
| 6         | 3.494  | 1.823  | -0.987 | 6         | 4.019  | 1.677  | 0.303  |
| 6         | 4.887  | 1.255  | -1.162 | 6         | 1.694  | -1.467 | -0.800 |
| 6         | 4.586  | 2.094  | 0.028  | 6         | 4.624  | 2.719  | -0.619 |
| 6         | 0.440  | -0.687 | 0.017  | 6         | 2.616  | 2.076  | 0.734  |
| 6         | 2.421  | 0.951  | -0.647 | 6         | -0.276 | -0.493 | 0.110  |
| 6         | -0.922 | -0.059 | -0.185 | 6         | -2.849 | 0.630  | -0.126 |
| 6         | 1.525  | 0.196  | -0.357 | 6         | -0.942 | -0.005 | 1.239  |
| 6         | -1.975 | -0.890 | -0.567 | 6         | -0.897 | -0.419 | -1.138 |
| 6         | 0.614  | -1.108 | 1.504  | 6         | -2.206 | 0.545  | 1.116  |
| 6         | -1.147 | 1.293  | 0.038  | 6         | -2.170 | 0.138  | -1.239 |
| 6         | -3.259 | -0.363 | -0.708 | 6         | -4.241 | 1.178  | -0.241 |
| 6         | -0.449 | -2.758 | -0.994 | 6         | -5.398 | 0.205  | -0.013 |
| 6         | -2.430 | 1.806  | -0.100 | 1         | 3.151  | -0.511 | 1.285  |
| 6         | -3.489 | 0.982  | -0.468 | 1         | 4.719  | -1.177 | 0.851  |
| 1         | 3.229  | 2.651  | -1.638 | 1         | 3.644  | -2.108 | -1.258 |
| 1         | 5.486  | 1.676  | -1.960 | 1         | 4.655  | 1.602  | 1.207  |
| 1         | 4.999  | 0.187  | -1.021 | 1         | 4.827  | 0.284  | -0.948 |
| 1         | 4.492  | 1.603  | 0.988  | 1         | 1.801  | -0.658 | -1.533 |
| 1         | 4.974  | 3.104  | 0.067  | 1         | 1.178  | -2.316 | -1.267 |
| 1         | -0.323 | 1.936  | 0.327  | 1         | 5.645  | 2.456  | -0.913 |
| 1         | -2.458 | -2.851 | -1.073 | 1         | 4.661  | 3.697  | -0.136 |
| 1         | -4.076 | -1.009 | -1.011 | 1         | 4.025  | 2.815  | -1.530 |
| 1         | -4.484 | 1.396  | -0.575 | 1         | 2.633  | 3.020  | 1.284  |
|           |        |        |        | 1         | 1.972  | 2.197  | -0.142 |
|           |        |        |        | 1         | 2.153  | 1.326  | 1.379  |
|           |        |        |        | 1         | 3.785  | -3.276 | 0.819  |
|           |        |        |        | 1         | -0.445 | -0.066 | 2.201  |
|           |        |        |        | 1         | -0.403 | -0.787 | -2.028 |
|           |        |        |        | 1         | -2.710 | 0.921  | 2.003  |
|           |        |        |        | 1         | -2.645 | 0.189  | -2.216 |
|           |        |        |        | 1         | -4.412 | 1.612  | -1.230 |
|           |        |        |        | 1         | -4.402 | 1.996  | 0.468  |
|           |        |        |        | 1         | -5.780 | -1.758 | 0.408  |
|           |        |        |        | 1         | -4.086 | -1.378 | 0.300  |
| Caffeine  |        |        |        | Acitretin |        |        |        |
| 8         | -0.552 | -2.534 | 0.000  | 8         | -6.964 | 1.029  | -0.320 |
| 8         | 3.070  | 0.304  | 0.000  | 8         | 8.685  | 1.898  | -0.782 |
| 7         | 0.999  | 1.277  | 0.000  | 8         | 8.760  | -0.220 | -0.032 |
| 7         | -2.267 | 0.013  | 0.000  | 6         | -4.062 | -1.138 | -0.230 |
| 7         | 1.257  | -1.087 | 0.000  | 6         | -3.029 | -0.248 | 0.176  |





|   |          |        |        |   |             |        |        |
|---|----------|--------|--------|---|-------------|--------|--------|
| 1 | -3.663   | 1.901  | 2.807  | 1 | 0.034       | 0.131  | -2.761 |
| 1 | -5.558   | -1.822 | -1.136 | 1 | 1.355       | -1.825 | -1.967 |
| 1 | -1.261   | -0.489 | 1.368  |   |             |        |        |
| 1 | -4.050   | -3.644 | -1.977 |   |             |        |        |
| 1 | 0.944    | -1.210 | 2.136  |   |             |        |        |
| 1 | 1.713    | -2.644 | 1.469  |   |             |        |        |
| 1 | -1.340   | -4.456 | -1.685 |   |             |        |        |
| 1 | 0.723    | -3.821 | -0.474 |   |             |        |        |
| 1 | 1.516    | 0.082  | 0.068  |   |             |        |        |
| 1 | 2.272    | -1.369 | -0.630 |   |             |        |        |
| 1 | 3.560    | 2.387  | 0.709  |   |             |        |        |
| 1 | 5.357    | -1.093 | -1.023 |   |             |        |        |
| 1 | 4.656    | 3.820  | -1.018 |   |             |        |        |
| 1 | 6.457    | 0.331  | -2.755 |   |             |        |        |
| 1 | 6.097    | 2.780  | -2.742 |   |             |        |        |
|   | Etodolac |        |        |   | Cabergoline |        |        |
| 8 | 2.309    | 0.936  | 0.823  | 8 | 2.475       | 1.687  | -0.163 |
| 8 | 4.296    | -1.697 | -0.574 | 8 | 2.332       | -2.437 | 1.589  |
| 8 | 4.486    | 0.364  | -1.451 | 7 | -1.588      | 2.354  | 0.419  |
| 7 | -0.791   | -0.737 | -0.289 | 7 | -5.888      | -1.274 | -1.658 |
| 6 | 1.642    | -0.192 | 0.253  | 7 | 2.613       | -0.204 | 1.071  |
| 6 | 0.202    | 0.162  | 0.048  | 7 | 1.382       | -0.893 | 2.948  |
| 6 | -0.334   | 1.410  | 0.198  | 7 | 5.996       | -0.099 | -1.592 |
| 6 | 0.529    | 2.578  | 0.532  | 6 | -1.820      | -0.085 | 0.236  |
| 6 | 1.803    | -1.320 | 1.279  | 6 | -2.314      | 1.290  | -0.296 |
| 6 | 2.288    | -0.558 | -1.115 | 6 | -0.310      | -0.223 | 0.105  |
| 6 | -1.743   | 1.292  | -0.027 | 6 | 0.398       | 0.958  | 0.763  |
| 6 | 1.974    | 2.197  | 0.245  | 6 | -3.842      | 1.458  | -0.160 |
| 6 | -2.002   | -0.071 | -0.318 | 6 | -0.148      | 2.249  | 0.178  |
| 6 | -3.280   | -0.568 | -0.586 | 6 | -2.559      | -1.236 | -0.405 |
| 6 | 1.090    | -1.046 | 2.591  | 6 | -3.864      | -0.965 | -0.807 |
| 6 | -2.813   | 2.196  | -0.014 | 6 | -4.547      | 0.273  | -0.727 |
| 6 | 3.788    | -0.545 | -1.082 | 6 | -2.041      | 3.703  | 0.071  |
| 6 | -3.516   | -2.031 | -0.831 | 6 | 1.902       | 0.878  | 0.547  |
| 6 | -4.313   | 0.364  | -0.558 | 6 | -4.704      | -1.925 | -1.393 |
| 6 | -4.087   | 1.721  | -0.280 | 6 | -2.100      | -2.529 | -0.618 |
| 6 | -3.496   | -2.858 | 0.454  | 6 | -5.788      | 0.056  | -1.264 |
| 1 | 0.258    | 3.459  | -0.062 | 6 | -4.246      | 3.228  | -1.595 |
| 1 | 0.413    | 2.867  | 1.585  | 6 | -2.941      | -3.500 | -1.200 |
| 1 | 2.873    | -1.468 | 1.448  | 6 | -1.401      | 4.753  | 0.919  |
| 1 | 1.443    | -2.254 | 0.829  | 6 | 3.925       | -0.470 | 0.453  |
| 1 | 1.923    | -1.540 | -1.428 | 6 | 2.096       | -1.273 | 1.858  |
| 1 | 1.976    | 0.171  | -1.865 | 6 | 3.793       | -1.058 | -0.943 |
| 1 | 2.156    | 2.174  | -0.840 | 6 | -0.853      | 5.873  | 0.457  |
| 1 | 2.682    | 2.905  | 0.679  | 6 | 5.141       | -1.280 | -1.607 |
| 1 | -0.675   | -1.736 | -0.350 | 6 | 0.719       | -1.878 | 3.791  |
| 1 | 1.427    | -0.102 | 3.022  | 6 | 5.388       | 1.027  | -2.278 |
| 1 | 0.006    | -0.979 | 2.459  | 6 | 7.290       | -0.410 | -2.160 |
| 1 | 1.288    | -1.838 | 3.316  | 6 | -0.533      | -2.448 | 3.151  |
| 1 | -2.647   | 3.247  | 0.203  | 1 | -2.060      | -0.084 | 1.314  |
| 1 | -4.479   | -2.162 | -1.334 | 1 | -2.067      | 1.328  | -1.380 |
| 1 | -2.762   | -2.419 | -1.530 | 1 | -0.034      | -0.263 | -0.959 |
| 1 | -5.325   | 0.023  | -0.761 | 1 | 0.011       | -1.173 | 0.540  |
| 1 | -4.928   | 2.406  | -0.276 | 1 | 0.147       | 0.953  | 1.829  |
| 1 | -2.550   | -2.748 | 0.993  | 1 | -4.170      | 2.369  | -0.667 |
| 1 | -3.642   | -3.921 | 0.250  | 1 | -4.077      | 1.593  | 0.906  |
| 1 | -4.287   | -2.534 | 1.135  | 1 | 0.085       | 2.295  | -0.902 |
| 1 | 5.258    | -1.589 | -0.566 | 1 | 0.349       | 3.109  | 0.631  |
|   |          |        |        | 1 | -1.878      | 3.933  | -1.001 |
|   |          |        |        | 1 | -3.119      | 3.756  | 0.244  |
|   |          |        |        | 1 | -1.089      | -2.815 | -0.345 |
|   |          |        |        | 1 | -6.625      | 0.723  | -1.410 |
|   |          |        |        | 1 | -6.698      | -1.681 | -2.095 |
|   |          |        |        | 1 | -4.865      | -3.998 | -2.043 |
|   |          |        |        | 1 | -2.550      | -4.501 | -1.350 |
|   |          |        |        | 1 | -1.433      | 4.565  | 1.993  |
|   |          |        |        | 1 | 4.474       | 0.472  | 0.424  |
|   |          |        |        | 1 | 4.462       | -1.156 | 1.111  |
|   |          |        |        | 1 | 3.173       | -0.392 | -1.553 |
|   |          |        |        | 1 | 3.263       | -2.013 | -0.880 |
|   |          |        |        | 1 | -0.443      | 6.626  | 1.121  |
|   |          |        |        | 1 | -0.797      | 6.078  | -0.608 |
|   |          |        |        | 1 | 5.683       | -2.077 | -1.082 |
|   |          |        |        | 1 | 4.981       | -1.644 | -2.643 |
|   |          |        |        | 1 | 1.388       | 0.075  | 3.223  |
|   |          |        |        | 1 | 0.488       | -1.386 | 4.739  |
|   |          |        |        | 1 | 1.431       | -2.681 | 4.007  |
|   |          |        |        | 1 | 4.474       | 1.345  | -1.771 |
|   |          |        |        | 1 | 5.141       | 0.801  | -3.334 |
|   |          |        |        | 1 | 6.082       | 1.872  | -2.272 |
|   |          |        |        | 1 | 7.233       | -0.712 | -3.224 |
|   |          |        |        | 1 | 7.755       | -1.230 | -1.605 |
|   |          |        |        | 1 | 7.948       | 0.461  | -2.094 |
|   |          |        |        | 1 | -1.010      | -3.174 | 3.813  |

|   |              |        |        |                  |        |        |        |
|---|--------------|--------|--------|------------------|--------|--------|--------|
|   |              |        |        | 1                | -0.285 | -2.962 | 2.219  |
|   |              |        |        | 1                | -1.261 | -1.664 | 2.927  |
|   | Darifenacin  |        |        | Cimetidine       |        |        |        |
| 8 | -1.906       | -1.063 | 2.288  | 16               | 0.821  | -1.805 | -0.621 |
| 8 | 8.218        | -0.152 | 0.149  | 7                | 4.328  | 1.076  | -0.371 |
| 7 | 0.610        | -1.297 | -0.855 | 7                | -1.932 | -0.508 | 0.021  |
| 7 | -1.932       | 1.186  | 2.340  | 7                | 3.888  | -0.606 | 0.994  |
| 6 | -1.637       | -0.644 | -0.610 | 7                | -2.878 | 1.613  | 0.162  |
| 6 | -2.725       | 0.028  | 0.289  | 7                | -4.248 | -0.315 | -0.091 |
| 6 | -1.536       | -2.185 | -0.472 | 7                | -0.639 | 2.595  | 0.641  |
| 6 | -0.191       | -0.169 | -0.399 | 6                | 2.716  | -0.137 | 0.442  |
| 6 | -0.053       | -2.456 | -0.261 | 6                | 1.411  | -0.754 | 0.780  |
| 6 | 2.012        | -1.212 | -0.497 | 6                | -0.654 | -2.575 | 0.140  |
| 6 | -4.019       | -0.795 | 0.184  | 6                | -1.969 | -1.931 | -0.257 |
| 6 | -3.074       | 1.453  | -0.160 | 6                | 2.961  | 0.908  | -0.419 |
| 6 | -2.171       | -0.008 | 1.736  | 6                | 2.071  | 1.738  | -1.262 |
| 6 | 2.744        | -0.065 | -1.188 | 6                | 4.833  | 0.146  | 0.490  |
| 6 | -4.592       | -0.952 | -1.083 | 6                | -3.093 | 0.211  | 0.005  |
| 6 | -4.147       | 2.106  | 0.466  | 6                | -5.405 | 0.534  | 0.043  |
| 6 | -4.677       | -1.355 | 1.279  | 6                | -1.699 | 2.160  | 0.428  |
| 6 | -2.402       | 2.139  | -1.173 | 1                | 1.536  | -1.398 | 1.653  |
| 6 | 4.215        | -0.071 | -0.877 | 1                | 0.651  | 0.000  | 1.008  |
| 6 | -5.772       | -1.660 | -1.256 | 1                | -0.515 | -2.541 | 1.224  |
| 6 | -4.517       | 3.395  | 0.111  | 1                | -0.657 | -3.626 | -0.157 |
| 6 | -5.867       | -2.060 | 1.107  | 1                | -2.796 | -2.362 | 0.313  |
| 6 | -2.776       | 3.431  | -1.538 | 1                | -2.188 | -2.119 | -1.318 |
| 6 | 4.693        | 0.493  | 0.314  | 1                | 4.852  | 1.770  | -0.882 |
| 6 | 5.126        | -0.687 | -1.739 | 1                | -1.113 | -0.052 | -0.373 |
| 6 | -6.417       | -2.221 | -0.157 | 1                | 2.007  | 2.772  | -0.910 |
| 6 | -3.829       | 4.068  | -0.896 | 1                | 2.398  | 1.755  | -2.307 |
| 6 | 6.044        | 0.444  | 0.608  | 1                | 1.058  | 1.335  | -1.243 |
| 6 | 6.924        | -0.171 | -0.278 | 1                | 5.889  | 0.073  | 0.705  |
| 6 | 6.837        | 0.896  | 1.800  | 1                | -3.693 | 2.209  | 0.151  |
| 6 | 6.491        | -0.747 | -1.460 | 1                | -5.421 | 1.102  | 0.987  |
| 6 | 8.272        | 0.740  | 1.285  | 1                | -6.308 | -0.077 | 0.027  |
| 1 | -1.914       | -0.417 | -1.645 | 1                | -5.502 | 1.256  | -0.783 |
| 1 | -2.130       | -2.563 | 0.359  |                  |        |        |        |
| 1 | -1.901       | -2.665 | -1.384 |                  |        |        |        |
| 1 | 0.058        | 0.735  | -0.961 |                  |        |        |        |
| 1 | 0.007        | 0.050  | 0.669  |                  |        |        |        |
| 1 | 0.301        | -3.378 | -0.731 |                  |        |        |        |
| 1 | 0.170        | -2.523 | 0.821  |                  |        |        |        |
| 1 | 2.138        | -1.118 | 0.603  |                  |        |        |        |
| 1 | 2.488        | -2.159 | -0.777 |                  |        |        |        |
| 1 | 2.579        | -0.145 | -2.268 |                  |        |        |        |
| 1 | 2.306        | 0.890  | -0.874 |                  |        |        |        |
| 1 | -4.110       | -0.500 | -1.947 |                  |        |        |        |
| 1 | -4.705       | 1.582  | 1.238  |                  |        |        |        |
| 1 | -4.256       | -1.263 | 2.273  |                  |        |        |        |
| 1 | -1.581       | 1.670  | -1.701 |                  |        |        |        |
| 1 | -2.146       | 2.070  | 1.910  |                  |        |        |        |
| 1 | -1.526       | 1.169  | 3.262  |                  |        |        |        |
| 1 | -6.193       | -1.771 | -2.251 |                  |        |        |        |
| 1 | -5.353       | 3.872  | 0.614  |                  |        |        |        |
| 1 | -6.361       | -2.489 | 1.974  |                  |        |        |        |
| 1 | -2.237       | 3.938  | -2.332 |                  |        |        |        |
| 1 | 3.995        | 0.969  | 1.000  |                  |        |        |        |
| 1 | 4.757        | -1.126 | -2.663 |                  |        |        |        |
| 1 | -7.341       | -2.774 | -0.288 |                  |        |        |        |
| 1 | -4.120       | 5.073  | -1.182 |                  |        |        |        |
| 1 | 6.622        | 1.922  | 2.109  |                  |        |        |        |
| 1 | 6.643        | 0.252  | 2.666  |                  |        |        |        |
| 1 | 7.191        | -1.219 | -2.140 |                  |        |        |        |
| 1 | 8.966        | 0.310  | 2.007  |                  |        |        |        |
| 1 | 8.680        | 1.697  | 0.937  |                  |        |        |        |
|   | Escitalopram |        |        | Chlordiazepoxide |        |        |        |
| 9 | -1.197       | 5.330  | -0.281 | 17               | -2.808 | 3.494  | -0.244 |
| 8 | 0.135        | -0.450 | 1.737  | 8                | 1.296  | -2.707 | -0.270 |
| 7 | -4.521       | -1.908 | -0.433 | 7                | 1.071  | -1.452 | -0.858 |
| 7 | 6.702        | -1.770 | -0.665 | 7                | 2.538  | 1.022  | 0.202  |
| 6 | 0.139        | -0.114 | 0.332  | 7                | 4.064  | -0.797 | 0.203  |
| 6 | -0.793       | -1.085 | -0.413 | 6                | 0.027  | -0.760 | -0.352 |
| 6 | 1.576        | -0.356 | -0.071 | 6                | 0.074  | 0.649  | -0.230 |
| 6 | 2.224        | -1.050 | 0.944  | 6                | 2.269  | -0.813 | -1.367 |
| 6 | -2.251       | -0.979 | 0.004  | 6                | 1.291  | 1.432  | 0.019  |
| 6 | -0.264       | 1.342  | 0.180  | 6                | -1.170 | -1.544 | -0.004 |
| 6 | 1.253        | -1.268 | 2.059  | 6                | 3.023  | -0.173 | -0.222 |
| 6 | -3.088       | -2.091 | -0.606 | 6                | -1.182 | 1.339  | -0.292 |
| 6 | 2.237        | -0.020 | -1.243 | 6                | 1.101  | 2.849  | 0.200  |
| 6 | 3.547        | -1.432 | 0.812  | 6                | -1.622 | -2.575 | -0.837 |
| 6 | -0.696       | 1.837  | -1.053 | 6                | -1.873 | -1.267 | 1.173  |
| 6 | -0.157       | 2.226  | 1.253  | 6                | -1.267 | 2.686  | -0.125 |
| 6 | 3.567        | -0.390 | -1.391 | 6                | -0.109 | 3.462  | 0.132  |
| 6 | 4.224        | -1.094 | -0.370 | 6                | -2.754 | -3.302 | -0.505 |

|   |                           |        |        |   |                           |        |        |
|---|---------------------------|--------|--------|---|---------------------------|--------|--------|
| 6 | -1.008                    | 3.181  | -1.220 | 6 | -3.000                    | -2.004 | 1.510  |
| 6 | -0.472                    | 3.572  | 1.107  | 6 | -3.445                    | -3.022 | 0.672  |
| 6 | -0.890                    | 4.026  | -0.131 | 6 | 4.709                     | -0.259 | 1.379  |
| 6 | -4.910                    | -1.928 | 0.965  | 1 | 2.886                     | -1.569 | -1.855 |
| 6 | -5.251                    | -2.917 | -1.174 | 1 | 1.939                     | -0.072 | -2.102 |
| 6 | 5.589                     | -1.465 | -0.533 | 1 | -2.079                    | 0.772  | -0.506 |
| 1 | -0.685                    | -0.935 | -1.495 | 1 | 2.002                     | 3.419  | 0.397  |
| 1 | -0.420                    | -2.100 | -0.223 | 1 | -1.088                    | -2.785 | -1.759 |
| 1 | -2.300                    | -1.009 | 1.097  | 1 | -1.520                    | -0.475 | 1.826  |
| 1 | -2.666                    | -0.011 | -0.300 | 1 | -0.201                    | 4.534  | 0.266  |
| 1 | 0.955                     | -2.326 | 2.136  | 1 | -3.104                    | -4.088 | -1.166 |
| 1 | 1.634                     | -0.963 | 3.040  | 1 | -3.531                    | -1.786 | 2.430  |
| 1 | -2.896                    | -2.137 | -1.686 | 1 | 1.572                     | -3.274 | -1.002 |
| 1 | -2.756                    | -3.070 | -0.196 | 1 | -4.328                    | -3.595 | 0.932  |
| 1 | 1.734                     | 0.536  | -2.029 | 1 | 4.312                     | -0.737 | 2.283  |
| 1 | 4.067                     | -1.974 | 1.595  | 1 | 5.777                     | -0.489 | 1.343  |
| 1 | -0.803                    | 1.169  | -1.903 | 1 | 4.568                     | 0.823  | 1.494  |
| 1 | 0.165                     | 1.847  | 2.216  |   |                           |        |        |
| 1 | 4.114                     | -0.135 | -2.292 |   |                           |        |        |
| 1 | -1.348                    | 3.572  | -2.172 |   |                           |        |        |
| 1 | -0.399                    | 4.265  | 1.937  |   |                           |        |        |
| 1 | -4.449                    | -1.100 | 1.507  |   |                           |        |        |
| 1 | -4.631                    | -2.871 | 1.474  |   |                           |        |        |
| 1 | -5.993                    | -1.813 | 1.043  |   |                           |        |        |
| 1 | -5.045                    | -3.946 | -0.820 |   |                           |        |        |
| 1 | -4.986                    | -2.867 | -2.233 |   |                           |        |        |
| 1 | -6.326                    | -2.741 | -1.084 |   |                           |        |        |
|   | <b>Dexmethylphenidate</b> |        |        |   | <b>Diethylcarbamazine</b> |        |        |
| 8 | 0.126                     | 2.255  | 0.632  | 8 | 0.737                     | 0.565  | 1.684  |
| 8 | -0.605                    | 2.541  | -1.480 | 7 | -0.271                    | -0.884 | 0.219  |
| 7 | 2.339                     | 0.377  | -0.416 | 7 | -2.996                    | -0.157 | -0.284 |
| 6 | 1.115                     | -0.281 | 0.042  | 7 | 1.753                     | 0.170  | -0.341 |
| 6 | 1.235                     | -1.781 | -0.209 | 6 | -0.808                    | -0.858 | -1.141 |
| 6 | -0.090                    | 0.304  | -0.712 | 6 | -1.319                    | -1.131 | 1.204  |
| 6 | 2.480                     | -2.356 | 0.454  | 6 | -1.949                    | 0.141  | -1.248 |
| 6 | 3.721                     | -1.585 | 0.027  | 6 | -2.451                    | -0.129 | 1.071  |
| 6 | 3.525                     | -0.103 | 0.291  | 6 | 0.737                     | -0.005 | 0.602  |
| 6 | -1.398                    | -0.325 | -0.277 | 6 | -4.101                    | 0.768  | -0.417 |
| 6 | -0.216                    | 1.811  | -0.604 | 6 | 2.692                     | 1.251  | -0.024 |
| 6 | -1.845                    | -0.218 | 1.043  | 6 | 2.369                     | -1.026 | -0.926 |
| 6 | -2.170                    | -1.042 | -1.192 | 6 | 2.062                     | 2.618  | -0.190 |
| 6 | -3.032                    | -0.824 | 1.438  | 6 | 3.335                     | -1.726 | 0.017  |
| 6 | -3.358                    | -1.648 | -0.798 | 1 | -1.169                    | -1.863 | -1.392 |
| 6 | -3.792                    | -1.542 | 0.519  | 1 | -0.021                    | -0.590 | -1.845 |
| 6 | -0.057                    | 3.661  | 0.834  | 1 | -0.878                    | -1.080 | 2.198  |
| 1 | 0.958                     | -0.123 | 1.128  | 1 | -1.703                    | -2.144 | 1.034  |
| 1 | 1.283                     | -1.946 | -1.294 | 1 | -1.542                    | 1.165  | -1.099 |
| 1 | 0.334                     | -2.287 | 0.151  | 1 | -2.380                    | 0.108  | -2.255 |
| 1 | 0.052                     | 0.107  | -1.779 | 1 | -3.255                    | -0.372 | 1.774  |
| 1 | 2.580                     | -3.421 | 0.221  | 1 | -2.075                    | 0.879  | 1.333  |
| 1 | 2.371                     | -2.289 | 1.545  | 1 | -4.890                    | 0.510  | 0.294  |
| 1 | 4.608                     | -1.945 | 0.557  | 1 | -4.519                    | 0.708  | -1.426 |
| 1 | 3.901                     | -1.735 | -1.044 | 1 | -3.807                    | 1.819  | -0.232 |
| 1 | 2.252                     | 1.376  | -0.251 | 1 | 3.536                     | 1.140  | -0.714 |
| 1 | 3.448                     | 0.058  | 1.384  | 1 | 3.087                     | 1.136  | 0.994  |
| 1 | 4.387                     | 0.474  | -0.057 | 1 | 2.882                     | -0.719 | -1.845 |
| 1 | -1.258                    | 0.347  | 1.761  | 1 | 1.583                     | -1.720 | -1.224 |
| 1 | -1.831                    | -1.127 | -2.220 | 1 | 1.224                     | 2.746  | 0.498  |
| 1 | -3.366                    | -0.734 | 2.467  | 1 | 1.696                     | 2.759  | -1.211 |
| 1 | -3.946                    | -2.204 | -1.521 | 1 | 2.790                     | 3.405  | 0.022  |
| 1 | -4.719                    | -2.014 | 0.829  | 1 | 2.823                     | -2.042 | 0.931  |
| 1 | -1.105                    | 3.933  | 0.699  | 1 | 4.162                     | -1.074 | 0.307  |
| 1 | 0.546                     | 4.234  | 0.127  | 1 | 3.762                     | -2.615 | -0.454 |
| 1 | 0.261                     | 3.859  | 1.855  |   |                           |        |        |
|   | <b>Betaxolol</b>          |        |        |   | <b>Dicyclomine</b>        |        |        |
| 8 | -4.048                    | 0.464  | -0.234 | 8 | -0.473                    | 0.172  | -0.004 |
| 8 | 1.749                     | -1.717 | 0.066  | 8 | 0.391                     | 1.115  | -1.851 |
| 8 | 4.530                     | -2.141 | -0.345 | 7 | -4.062                    | -0.556 | -0.280 |
| 7 | 3.241                     | 1.324  | -0.042 | 6 | 1.842                     | 0.706  | 0.072  |
| 6 | -2.742                    | 2.394  | -0.681 | 6 | 2.265                     | -0.792 | 0.195  |
| 6 | -1.506                    | 3.208  | -0.447 | 6 | 2.882                     | 1.561  | -0.668 |
| 6 | -1.525                    | 2.170  | -1.530 | 6 | 1.598                     | 1.306  | 1.470  |
| 6 | -3.128                    | 1.376  | 0.343  | 6 | 2.227                     | -1.552 | -1.136 |
| 6 | -4.453                    | -0.574 | 0.643  | 6 | 3.634                     | -0.996 | 0.852  |
| 6 | -3.915                    | -1.922 | 0.175  | 6 | 2.526                     | 3.045  | -0.705 |
| 6 | -2.416                    | -1.942 | 0.104  | 6 | 1.193                     | 2.774  | 1.405  |
| 6 | 3.861                     | -0.949 | -0.727 | 6 | 2.540                     | -3.032 | -0.947 |
| 6 | 3.903                     | 0.100  | 0.382  | 6 | 3.931                     | -2.477 | 1.065  |
| 6 | 2.533                     | 2.076  | 1.000  | 6 | 2.257                     | 3.598  | 0.689  |
| 6 | 2.442                     | -1.301 | -1.103 | 6 | 3.879                     | -3.242 | -0.251 |
| 6 | -1.637                    | -2.175 | 1.244  | 6 | 0.536                     | 0.719  | -0.720 |
| 6 | -1.751                    | -1.646 | -1.082 | 6 | -1.734                    | 0.075  | -0.687 |
| 6 | 0.394                     | -1.793 | 0.005  | 6 | -2.733                    | -0.478 | 0.307  |
| 6 | 2.178                     | 3.441  | 0.436  | 6 | -4.734                    | 0.742  | -0.246 |



|    |                     |        |        |    |                  |        |        |
|----|---------------------|--------|--------|----|------------------|--------|--------|
| 1  | 0.080               | 0.043  | 3.847  |    |                  |        |        |
| 1  | 3.850               | -0.926 | 1.552  |    |                  |        |        |
| 1  | 3.402               | 0.845  | -2.341 |    |                  |        |        |
|    | Dexchlorpheniramine |        |        |    | Chlorpheniramine |        |        |
| 17 | -5.557              | -0.189 | -0.080 | 17 | -5.557           | -0.189 | -0.080 |
| 7  | 3.089               | -1.757 | -0.107 | 7  | 3.089            | -1.757 | -0.107 |
| 7  | 1.000               | 1.784  | 0.908  | 7  | 1.000            | 1.784  | 0.908  |
| 6  | 0.490               | -0.389 | -0.065 | 6  | 0.490            | -0.389 | -0.065 |
| 6  | 1.033               | -1.145 | 1.156  | 6  | 1.033            | -1.145 | 1.156  |
| 6  | 2.551               | -1.252 | 1.151  | 6  | 2.551            | -1.252 | 1.151  |
| 6  | -1.022              | -0.323 | -0.059 | 6  | -1.022           | -0.323 | -0.059 |
| 6  | 1.126               | 0.983  | -0.160 | 6  | 1.126            | 0.983  | -0.160 |
| 6  | -1.751              | -0.870 | -1.115 | 6  | -1.751           | -0.870 | -1.115 |
| 6  | -1.726              | 0.270  | 0.993  | 6  | -1.726           | 0.270  | 0.993  |
| 6  | 1.834               | 1.367  | -1.300 | 6  | 1.834            | 1.367  | -1.300 |
| 6  | 2.730               | -3.144 | -0.333 | 6  | 2.730            | -3.144 | -0.333 |
| 6  | 4.526               | -1.580 | -0.160 | 6  | 4.526            | -1.580 | -0.160 |
| 6  | -3.141              | -0.836 | -1.134 | 6  | -3.141           | -0.837 | -1.134 |
| 6  | -3.114              | 0.316  | 0.992  | 6  | -3.114           | 0.316  | 0.992  |
| 6  | 2.419               | 2.625  | -1.340 | 6  | 2.420            | 2.625  | -1.340 |
| 6  | -3.811              | -0.241 | -0.074 | 6  | -3.811           | -0.240 | -0.074 |
| 6  | 1.563               | 2.991  | 0.854  | 6  | 1.564            | 2.991  | 0.854  |
| 6  | 2.281               | 3.462  | -0.239 | 6  | 2.282            | 3.462  | -0.239 |
| 1  | 0.795               | -0.940 | -0.961 | 1  | 0.795            | -0.940 | -0.961 |
| 1  | 0.728               | -0.622 | 2.068  | 1  | 0.727            | -0.622 | 2.068  |
| 1  | 0.565               | -2.135 | 1.199  | 1  | 0.565            | -2.135 | 1.198  |
| 1  | 2.883               | -1.872 | 2.008  | 1  | 2.883            | -1.873 | 2.008  |
| 1  | 2.980               | -0.256 | 1.309  | 1  | 2.980            | -0.256 | 1.309  |
| 1  | -1.222              | -1.335 | -1.944 | 1  | -1.222           | -1.335 | -1.943 |
| 1  | -1.176              | 0.717  | 1.814  | 1  | -1.176           | 0.718  | 1.814  |
| 1  | 1.930               | 0.675  | -2.130 | 1  | 1.930            | 0.675  | -2.131 |
| 1  | 1.645               | -3.257 | -0.389 | 1  | 1.645            | -3.257 | -0.389 |
| 1  | 3.099               | -3.819 | 0.463  | 1  | 3.099            | -3.819 | 0.463  |
| 1  | 3.150               | -3.484 | -1.283 | 1  | 3.150            | -3.484 | -1.283 |
| 1  | 4.770               | -0.519 | -0.055 | 1  | 4.770            | -0.519 | -0.055 |
| 1  | 4.909               | -1.924 | -1.124 | 1  | 4.909            | -1.924 | -1.124 |
| 1  | 5.062               | -2.134 | 0.634  | 1  | 5.062            | -2.134 | 0.634  |
| 1  | -3.699              | -1.266 | -1.958 | 1  | -3.699           | -1.266 | -1.957 |
| 1  | -3.655              | 0.778  | 1.809  | 1  | -3.655           | 0.779  | 1.808  |
| 1  | 2.977               | 2.946  | -2.214 | 1  | 2.977            | 2.946  | -2.214 |
| 1  | 1.438               | 3.615  | 1.737  | 1  | 1.438            | 3.615  | 1.737  |
| 1  | 2.721               | 4.453  | -0.223 | 1  | 2.721            | 4.453  | -0.223 |
|    | Desloratadine       |        |        |    | Chlorpromazine   |        |        |
| 17 | -5.371              | 0.282  | -0.161 | 17 | 4.929            | 0.566  | -0.798 |
| 7  | 3.061               | 3.360  | 0.493  | 16 | -0.383           | -1.679 | 1.667  |
| 7  | 1.795               | -1.640 | -1.596 | 7  | -0.189           | 0.120  | -0.710 |
| 6  | 1.400               | 1.262  | -0.511 | 7  | -2.187           | 2.250  | 0.628  |
| 6  | 0.649               | 0.146  | -0.406 | 6  | -0.313           | 1.399  | -1.400 |
| 6  | 2.892               | 1.234  | -0.688 | 6  | 0.010            | 2.569  | -0.474 |
| 6  | 0.869               | 2.656  | -0.325 | 6  | -0.763           | 2.478  | 0.835  |
| 6  | 3.581               | 2.001  | 0.438  | 6  | 1.054            | -0.251 | -0.181 |
| 6  | 1.636               | 3.365  | 0.791  | 6  | -1.214           | -0.839 | -0.811 |
| 6  | -0.830              | 0.162  | -0.259 | 6  | 1.120            | -1.143 | 0.904  |
| 6  | 1.258               | -1.212 | -0.447 | 6  | -1.396           | -1.778 | 0.216  |
| 6  | -0.916              | -1.334 | 1.869  | 6  | 2.247            | 0.255  | -0.705 |
| 6  | -1.535              | -0.526 | 0.748  | 6  | -2.066           | -0.895 | -1.918 |
| 6  | 0.606               | -1.401 | 1.959  | 6  | 2.351            | -1.527 | 1.424  |
| 6  | 1.231               | -1.982 | 0.728  | 6  | -2.403           | -2.734 | 0.135  |
| 6  | -1.569              | 0.854  | -1.234 | 6  | -2.862           | 3.434  | 0.138  |
| 6  | -2.933              | -0.468 | 0.753  | 6  | -2.825           | 1.741  | 1.825  |
| 6  | 1.784               | -3.256 | 0.679  | 6  | 3.462            | -0.111 | -0.139 |
| 6  | -2.952              | 0.908  | -1.225 | 6  | -3.096           | -1.827 | -1.976 |
| 6  | -3.628              | 0.238  | -0.213 | 6  | 3.536            | -1.002 | 0.921  |
| 6  | 2.335               | -3.715 | -0.511 | 6  | -3.271           | -2.749 | -0.952 |
| 6  | 2.318               | -2.869 | -1.613 | 1  | 0.295            | 1.435  | -2.316 |
| 1  | 3.276               | 0.215  | -0.742 | 1  | -1.356           | 1.485  | -1.703 |
| 1  | 3.144               | 1.722  | -1.639 | 1  | -0.217           | 3.497  | -1.010 |
| 1  | 1.005               | 3.229  | -1.252 | 1  | 1.080            | 2.611  | -0.245 |
| 1  | -0.197              | 2.657  | -0.092 | 1  | -0.576           | 3.382  | 1.446  |
| 1  | 3.422               | 1.451  | 1.387  | 1  | -0.381           | 1.628  | 1.412  |
| 1  | 4.660               | 2.041  | 0.264  | 1  | 2.235            | 0.932  | -1.550 |
| 1  | 1.296               | 4.401  | 0.882  | 1  | -1.921           | -0.207 | -2.742 |
| 1  | 1.405               | 2.858  | 1.749  | 1  | 2.380            | -2.226 | 2.253  |
| 1  | -1.308              | -0.950 | 2.819  | 1  | -2.515           | -3.452 | 0.940  |
| 1  | -1.304              | -2.359 | 1.795  | 1  | -3.917           | 3.212  | -0.043 |
| 1  | 0.876               | -2.001 | 2.834  | 1  | -2.810           | 4.284  | 0.845  |
| 1  | 1.008               | -0.395 | 2.131  | 1  | -2.427           | 3.763  | -0.810 |
| 1  | 3.560               | 3.892  | 1.196  | 1  | -2.331           | 0.818  | 2.139  |
| 1  | -1.025              | 1.351  | -2.031 | 1  | -3.874           | 1.513  | 1.617  |
| 1  | -3.485              | -0.986 | 1.532  | 1  | -2.796           | 2.454  | 2.671  |
| 1  | 1.790               | -3.879 | 1.570  | 1  | -3.753           | -1.838 | -2.839 |
| 1  | -3.498              | 1.446  | -1.990 | 1  | 4.494            | -1.276 | 1.345  |
| 1  | 2.774               | -4.705 | -0.584 | 1  | -4.069           | -3.482 | -0.998 |
| 1  | 2.746               | -3.190 | -2.560 |    |                  |        |        |

|    |                        |        |        |    |                        |        |        |
|----|------------------------|--------|--------|----|------------------------|--------|--------|
|    | <b>Brompheniramine</b> |        |        |    | <b>Chlorprothixene</b> |        |        |
| 35 | -5.074                 | -0.105 | -0.049 | 17 | 1.770                  | 4.024  | -1.100 |
| 7  | 3.710                  | -1.783 | -0.113 | 16 | -2.655                 | 0.479  | 1.592  |
| 7  | 1.675                  | 1.784  | 0.910  | 7  | 4.152                  | -1.776 | 0.667  |
| 6  | 1.129                  | -0.381 | -0.060 | 6  | -0.522                 | -0.590 | -0.372 |
| 6  | 1.668                  | -1.144 | 1.159  | 6  | 2.007                  | -1.004 | -0.336 |
| 6  | 3.184                  | -1.271 | 1.148  | 6  | -0.465                 | 0.850  | -0.066 |
| 6  | -0.381                 | -0.297 | -0.048 | 6  | -1.870                 | -1.179 | -0.488 |
| 6  | 1.782                  | 0.983  | -0.159 | 6  | 0.571                  | -1.370 | -0.508 |
| 6  | -1.122                 | -0.841 | -1.098 | 6  | 2.780                  | -2.130 | 0.343  |
| 6  | -1.074                 | 0.310  | 1.004  | 6  | -1.384                 | 1.432  | 0.826  |
| 6  | 2.486                  | 1.358  | -1.304 | 6  | -2.909                 | -0.767 | 0.364  |
| 6  | 3.331                  | -3.164 | -0.338 | 6  | 0.485                  | 1.681  | -0.671 |
| 6  | 5.149                  | -1.625 | -0.171 | 6  | -2.154                 | -2.176 | -1.429 |
| 6  | -2.512                 | -0.792 | -1.110 | 6  | -1.291                 | 2.786  | 1.151  |
| 6  | -2.462                 | 0.371  | 1.008  | 6  | -4.165                 | -1.374 | 0.303  |
| 6  | 3.087                  | 2.608  | -1.348 | 6  | 0.562                  | 3.024  | -0.339 |
| 6  | -3.173                 | -0.183 | -0.052 | 6  | -3.399                 | -2.783 | -1.490 |
| 6  | 2.253                  | 2.984  | 0.852  | 6  | 4.755                  | -2.802 | 1.495  |
| 6  | 2.969                  | 3.446  | -0.247 | 6  | 4.956                  | -1.544 | -0.517 |
| 1  | 1.424                  | -0.936 | -0.957 | 6  | -0.311                 | 3.587  | 0.586  |
| 1  | 1.372                  | -0.617 | 2.072  | 6  | -4.406                 | -2.387 | -0.613 |
| 1  | 1.187                  | -2.128 | 1.203  | 1  | 2.118                  | -0.086 | 0.250  |
| 1  | 3.511                  | -1.896 | 2.003  | 1  | 2.458                  | -0.793 | -1.316 |
| 1  | 3.627                  | -0.280 | 1.304  | 1  | 2.275                  | -2.389 | 1.281  |
| 1  | -0.602                 | -1.317 | -1.926 | 1  | 2.736                  | -3.041 | -0.292 |
| 1  | -0.515                 | 0.755  | 1.820  | 1  | 0.389                  | -2.426 | -0.712 |
| 1  | 2.567                  | 0.666  | -2.136 | 1  | 1.160                  | 1.274  | -1.414 |
| 1  | 2.244                  | -3.262 | -0.390 | 1  | -1.373                 | -2.468 | -2.124 |
| 1  | 3.694                  | -3.844 | 0.457  | 1  | -2.004                 | 3.220  | 1.845  |
| 1  | 3.742                  | -3.510 | -1.289 | 1  | -4.952                 | -1.040 | 0.972  |
| 1  | 5.409                  | -0.568 | -0.067 | 1  | -3.589                 | -3.556 | -2.227 |
| 1  | 5.524                  | -1.974 | -1.137 | 1  | 4.825                  | -3.782 | 0.987  |
| 1  | 5.680                  | -2.187 | 0.620  | 1  | 4.169                  | -2.937 | 2.408  |
| 1  | -3.073                 | -1.221 | -1.932 | 1  | 5.766                  | -2.501 | 1.782  |
| 1  | -2.989                 | 0.846  | 1.827  | 1  | 4.988                  | -2.422 | -1.192 |
| 1  | 3.642                  | 2.922  | -2.227 | 1  | 5.982                  | -1.313 | -0.221 |
| 1  | 2.143                  | 3.609  | 1.737  | 1  | 4.579                  | -0.692 | -1.084 |
| 1  | 3.421                  | 4.432  | -0.234 | 1  | -0.241                 | 4.639  | 0.836  |
|    |                        |        |        | 1  | -5.386                 | -2.850 | -0.657 |
|    | <b>Acebutolol</b>      |        |        |    | <b>Carprofen</b>       |        |        |
| 16 | -0.783                 | -1.147 | 0.405  | 17 | 5.649                  | -0.991 | -0.204 |
| 8  | -0.651                 | -2.520 | -0.210 | 8  | -4.643                 | -0.746 | -1.767 |
| 8  | -4.549                 | -0.684 | 0.533  | 8  | -4.834                 | 1.268  | -0.784 |
| 7  | -3.503                 | -2.537 | -0.284 | 7  | 0.489                  | 1.760  | 0.142  |
| 6  | 0.421                  | -0.038 | -0.543 | 6  | 0.372                  | -0.506 | 0.168  |
| 6  | 1.824                  | -0.495 | -0.242 | 6  | -0.383                 | 0.691  | 0.213  |
| 6  | 0.126                  | 1.404  | -0.252 | 6  | 1.756                  | -0.121 | 0.067  |
| 6  | -2.325                 | -0.419 | -0.302 | 6  | -2.420                 | -0.543 | 0.364  |
| 6  | 2.736                  | -0.593 | -1.295 | 6  | 1.787                  | 1.295  | 0.053  |
| 6  | -0.413                 | 2.216  | -1.254 | 6  | -3.933                 | -0.588 | 0.488  |
| 6  | 2.256                  | -0.801 | 1.050  | 6  | -1.769                 | 0.688  | 0.310  |
| 6  | 0.333                  | 1.953  | 1.017  | 6  | -0.298                 | -1.728 | 0.220  |
| 6  | 4.053                  | -0.968 | -1.062 | 6  | -1.682                 | -1.737 | 0.313  |
| 6  | -0.733                 | 3.543  | -0.999 | 6  | 2.951                  | -0.836 | -0.012 |
| 6  | 3.572                  | -1.182 | 1.284  | 6  | 2.981                  | 2.001  | -0.039 |
| 6  | 0.006                  | 3.278  | 1.275  | 6  | -4.429                 | 0.059  | 1.775  |
| 6  | 4.476                  | -1.261 | 0.230  | 6  | 4.135                  | -0.122 | -0.103 |
| 6  | -0.527                 | 4.078  | 0.268  | 6  | -4.527                 | 0.103  | -0.720 |
| 6  | -3.570                 | -1.222 | 0.051  | 6  | 4.163                  | 1.277  | -0.118 |
| 1  | 0.187                  | -0.262 | -1.590 | 1  | -4.238                 | -1.639 | 0.450  |
| 1  | -2.435                 | 0.593  | 0.087  | 1  | -2.337                 | 1.614  | 0.331  |
| 1  | -2.184                 | -0.389 | -1.388 | 1  | 0.218                  | 2.729  | 0.147  |
| 1  | 2.406                  | -0.371 | -2.306 | 1  | 0.254                  | -2.662 | 0.184  |
| 1  | -0.580                 | 1.798  | -2.244 | 1  | -2.214                 | -2.683 | 0.348  |
| 1  | 1.556                  | -0.767 | 1.880  | 1  | 2.964                  | -1.920 | -0.004 |
| 1  | 0.759                  | 1.341  | 1.806  | 1  | 3.000                  | 3.085  | -0.050 |
| 1  | 4.748                  | -1.038 | -1.892 | 1  | -3.974                 | -0.425 | 2.642  |
| 1  | -1.144                 | 4.161  | -1.791 | 1  | -4.171                 | 1.119  | 1.799  |
| 1  | 3.889                  | -1.426 | 2.292  | 1  | -5.515                 | -0.018 | 1.866  |
| 1  | 0.170                  | 3.689  | 2.265  | 1  | 5.115                  | 1.788  | -0.190 |
| 1  | 5.502                  | -1.561 | 0.414  | 1  | -4.973                 | -0.224 | -2.512 |
| 1  | -0.780                 | 5.113  | 0.471  |    |                        |        |        |
| 1  | -4.263                 | -3.125 | 0.021  |    |                        |        |        |
| 1  | -2.597                 | -2.961 | -0.463 |    |                        |        |        |
|    | <b>Carteolol</b>       |        |        |    | <b>Exemestane</b>      |        |        |
| 8  | 0.328                  | -1.393 | -0.514 | 8  | -4.887                 | -1.233 | -0.895 |
| 8  | 2.553                  | -2.337 | -2.150 | 8  | 5.385                  | -0.606 | -1.330 |
| 8  | -4.509                 | 2.556  | -0.881 | 6  | -1.953                 | 0.610  | -0.423 |
| 7  | 2.885                  | 0.141  | 0.584  | 6  | -0.580                 | 0.725  | 0.218  |
| 7  | -3.936                 | 0.572  | 0.049  | 6  | -2.744                 | -0.602 | 0.089  |
| 6  | 2.984                  | 1.610  | 0.750  | 6  | 0.207                  | -0.572 | -0.073 |
| 6  | 2.864                  | -0.354 | -0.783 | 6  | -1.996                 | -1.873 | -0.273 |
| 6  | 2.641                  | -1.864 | -0.813 | 6  | -0.578                 | -1.839 | 0.301  |

|    |             |        |        |   |                 |        |        |
|----|-------------|--------|--------|---|-----------------|--------|--------|
| 6  | 3.025       | 1.859  | 2.254  | 6 | 1.644           | -0.516 | 0.556  |
| 6  | 4.275       | 2.109  | 0.111  | 6 | -2.946          | 1.771  | -0.345 |
| 6  | 1.777       | 2.340  | 0.147  | 6 | 0.179           | 1.949  | -0.291 |
| 6  | -1.770      | -0.435 | -0.211 | 6 | -4.091          | -0.380 | -0.589 |
| 6  | 1.365       | -2.276 | -0.110 | 6 | -4.257          | 1.124  | -0.811 |
| 6  | -1.491      | 0.567  | -1.290 | 6 | -3.044          | -0.542 | 1.597  |
| 6  | -0.856      | -1.431 | 0.155  | 6 | 2.341           | 0.718  | 0.020  |
| 6  | -3.012      | -0.411 | 0.427  | 6 | 1.609           | 1.988  | 0.169  |
| 6  | -2.191      | 1.889  | -1.003 | 6 | 1.581           | -0.392 | 2.097  |
| 6  | -3.647      | 1.733  | -0.639 | 6 | 2.409           | -1.769 | 0.257  |
| 6  | -1.173      | -2.381 | 1.128  | 6 | 3.545           | 0.666  | -0.583 |
| 6  | -3.346      | -1.354 | 1.403  | 6 | 3.603           | -1.804 | -0.345 |
| 6  | -2.423      | -2.331 | 1.739  | 6 | 2.188           | 3.084  | 0.669  |
| 1  | 2.096       | 0.106  | -1.426 | 6 | 4.280           | -0.581 | -0.800 |
| 1  | 3.836       | -0.146 | -1.247 | 1 | -1.779          | 0.421  | -1.499 |
| 1  | 2.013       | -0.135 | 1.030  | 1 | -0.711          | 0.830  | 1.305  |
| 1  | 3.468       | -2.360 | -0.280 | 1 | 0.360           | -0.598 | -1.166 |
| 1  | 2.122       | 1.476  | 2.740  | 1 | -1.949          | -1.960 | -1.366 |
| 1  | 3.089       | 2.928  | 2.475  | 1 | -2.531          | -2.760 | 0.081  |
| 1  | 3.886       | 1.359  | 2.704  | 1 | -0.625          | -1.937 | 1.392  |
| 1  | 4.253       | 2.030  | -0.979 | 1 | -0.037          | -2.721 | -0.053 |
| 1  | 5.133       | 1.540  | 0.479  | 1 | -2.654          | 2.621  | -0.966 |
| 1  | 4.435       | 3.162  | 0.355  | 1 | -3.027          | 2.143  | 0.682  |
| 1  | 1.715       | 2.203  | -0.936 | 1 | -0.334          | 2.873  | -0.007 |
| 1  | 1.830       | 3.416  | 0.336  | 1 | 0.172           | 1.914  | -1.393 |
| 1  | 0.846       | 1.968  | 0.589  | 1 | -4.433          | 1.280  | -1.880 |
| 1  | 1.505       | -2.221 | 0.978  | 1 | -5.156          | 1.485  | -0.305 |
| 1  | 1.115       | -3.312 | -0.370 | 1 | -3.657          | -1.402 | 1.880  |
| 1  | -0.415      | 0.715  | -1.403 | 1 | -2.133          | -0.568 | 2.200  |
| 1  | -1.837      | 0.166  | -2.254 | 1 | -3.594          | 0.359  | 1.879  |
| 1  | -2.128      | 2.584  | -1.841 | 1 | 1.065           | -1.246 | 2.543  |
| 1  | -1.712      | 2.387  | -0.149 | 1 | 2.592           | -0.362 | 2.509  |
| 1  | -4.884      | 0.502  | 0.395  | 1 | 1.073           | 0.523  | 2.409  |
| 1  | -0.470      | -3.159 | 1.396  | 1 | 1.967           | -2.694 | 0.620  |
| 1  | -4.317      | -1.314 | 1.886  | 1 | 4.005           | 1.572  | -0.969 |
| 1  | -2.676      | -3.070 | 2.491  | 1 | 4.132           | -2.739 | -0.507 |
| 1  | 3.340       | -2.048 | -2.621 | 1 | 1.640           | 4.016  | 0.767  |
|    |             |        |        | 1 | 3.221           | 3.077  | 1.001  |
|    | Fenofibrate |        |        |   | Diphenhydramine |        |        |
| 17 | -7.717      | -2.016 | 0.076  | 8 | 0.840           | 0.334  | -0.201 |
| 8  | 2.353       | -0.008 | -0.828 | 7 | 3.662           | 0.468  | -0.164 |
| 8  | 5.692       | -0.145 | 0.313  | 6 | -0.339          | 0.003  | 0.515  |
| 8  | 4.636       | -1.118 | -1.432 | 6 | -1.470          | 0.956  | 0.198  |
| 8  | -3.182      | 2.859  | 0.243  | 6 | -0.660          | -1.447 | 0.218  |
| 6  | 3.376       | 0.234  | 0.159  | 6 | 1.447           | 1.531  | 0.232  |
| 6  | 3.597       | 1.726  | 0.370  | 6 | 2.824           | 1.636  | -0.381 |
| 6  | 3.049       | -0.468 | 1.474  | 6 | -2.101          | 1.683  | 1.204  |
| 6  | 4.618       | -0.428 | -0.449 | 6 | -1.943          | -1.948 | 0.445  |
| 6  | 6.944       | -0.793 | -0.067 | 6 | -1.885          | 1.127  | -1.125 |
| 6  | 1.079       | 0.407  | -0.558 | 6 | 0.337           | -2.313 | -0.235 |
| 6  | 0.169       | -0.480 | 0.018  | 6 | 3.770           | 0.094  | 1.230  |
| 6  | 0.655       | 1.681  | -0.948 | 6 | 4.966           | 0.674  | -0.757 |
| 6  | -1.585      | 1.179  | -0.178 | 6 | -3.139          | 2.562  | 0.902  |
| 6  | 8.044       | 0.058  | 0.517  | 6 | -2.226          | -3.292 | 0.227  |
| 6  | 6.939       | -2.216 | 0.447  | 6 | -2.913          | 2.008  | -1.431 |
| 6  | -1.153      | -0.098 | 0.198  | 6 | 0.049           | -3.655 | -0.460 |
| 6  | -0.659      | 2.065  | -0.741 | 6 | -3.546          | 2.725  | -0.417 |
| 6  | -2.969      | 1.669  | 0.062  | 6 | -1.230          | -4.150 | -0.228 |
| 6  | -4.104      | 0.700  | 0.077  | 1 | -0.120          | 0.093  | 1.598  |
| 6  | -5.245      | 1.032  | 0.816  | 1 | 0.850           | 2.410  | -0.058 |
| 6  | -4.110      | -0.475 | -0.681 | 1 | 1.502           | 1.541  | 1.334  |
| 6  | -6.352      | 0.199  | 0.831  | 1 | 2.731           | 1.780  | -1.464 |
| 6  | -5.221      | -1.308 | -0.696 | 1 | 3.292           | 2.559  | 0.023  |
| 6  | -6.329      | -0.968 | 0.072  | 1 | -1.776          | 1.557  | 2.235  |
| 1  | 2.699       | 2.186  | 0.789  | 1 | -2.727          | -1.279 | 0.788  |
| 1  | 3.834       | 2.223  | -0.573 | 1 | -1.389          | 0.562  | -1.910 |
| 1  | 4.421       | 1.890  | 1.064  | 1 | 1.331           | -1.920 | -0.419 |
| 1  | 2.898       | -1.540 | 1.318  | 1 | 2.800           | -0.232 | 1.616  |
| 1  | 2.141       | -0.050 | 1.915  | 1 | 4.145           | 0.911  | 1.877  |
| 1  | 3.866       | -0.333 | 2.184  | 1 | 4.460           | -0.748 | 1.324  |
| 1  | 6.984       | -0.792 | -1.162 | 1 | 5.568           | -0.233 | -0.662 |
| 1  | 0.509       | -1.469 | 0.307  | 1 | 5.530           | 1.506  | -0.291 |
| 1  | 1.365       | 2.349  | -1.421 | 1 | 4.859           | 0.900  | -1.821 |
| 1  | 7.977       | 0.087  | 1.608  | 1 | -3.624          | 3.121  | 1.696  |
| 1  | 7.995       | 1.082  | 0.143  | 1 | -3.228          | -3.667 | 0.407  |
| 1  | 9.019       | -0.356 | 0.250  | 1 | -3.229          | 2.134  | -2.461 |
| 1  | 6.841       | -2.231 | 1.536  | 1 | 0.830           | -4.318 | -0.820 |
| 1  | 6.120       | -2.789 | 0.010  | 1 | -4.352          | 3.411  | -0.657 |
| 1  | 7.875       | -2.715 | 0.185  | 1 | -1.452          | -5.198 | -0.405 |
| 1  | -1.850      | -0.790 | 0.660  |   |                 |        |        |
| 1  | -0.999      | 3.057  | -1.019 |   |                 |        |        |
| 1  | -5.244      | 1.960  | 1.378  |   |                 |        |        |
| 1  | -3.250      | -0.729 | -1.292 |   |                 |        |        |
| 1  | -7.230      | 0.446  | 1.416  |   |                 |        |        |

|   |                   |        |        |   |                |        |        |
|---|-------------------|--------|--------|---|----------------|--------|--------|
| 1 | -5.234            | -2.209 | -1.297 |   |                |        |        |
|   | aminocaproic acid |        |        |   | Dydrogesterone |        |        |
| 8 | -3.978            | -0.687 | 0.000  | 8 | -5.426         | -0.193 | 0.145  |
| 8 | -3.019            | 1.346  | 0.000  | 8 | 6.192          | -0.389 | -0.438 |
| 7 | 4.688             | 0.293  | 0.000  | 6 | -2.132         | -0.125 | 0.327  |
| 6 | 0.906             | -0.545 | 0.000  | 6 | -1.180         | 0.985  | -0.159 |
| 6 | -0.387            | 0.255  | 0.000  | 6 | 0.027          | 1.188  | 0.762  |
| 6 | 2.153             | 0.325  | 0.000  | 6 | 0.832          | -0.112 | 1.008  |
| 6 | -1.622            | -0.626 | 0.000  | 6 | -3.227         | -0.001 | -0.777 |
| 6 | 3.449             | -0.477 | 0.000  | 6 | -1.344         | -1.430 | 0.355  |
| 6 | -2.908            | 0.146  | 0.000  | 6 | -2.100         | 2.172  | -0.426 |
| 1 | 0.926             | -1.211 | 0.874  | 6 | -0.105         | -1.314 | 1.253  |
| 1 | 0.926             | -1.211 | -0.874 | 6 | 2.000          | -0.362 | 0.004  |
| 1 | -0.417            | 0.920  | 0.871  | 6 | -3.396         | 1.521  | -0.953 |
| 1 | -0.417            | 0.921  | -0.870 | 6 | -2.747         | 0.174  | 1.698  |
| 1 | 2.139             | 0.990  | 0.875  | 6 | 0.894          | 2.313  | 0.313  |
| 1 | 2.139             | 0.989  | -0.876 | 6 | 2.860          | 0.893  | -0.058 |
| 1 | -1.635            | -1.297 | -0.869 | 6 | 2.864          | -1.527 | 0.522  |
| 1 | -1.635            | -1.298 | 0.867  | 6 | -4.513         | -0.733 | -0.444 |
| 1 | 3.468             | -1.142 | -0.873 | 6 | 1.532          | -0.671 | -1.427 |
| 1 | 3.468             | -1.141 | 0.873  | 6 | 2.186          | 2.173  | -0.022 |
| 1 | 4.707             | 0.908  | 0.809  | 6 | 4.189          | -1.679 | -0.210 |
| 1 | 4.707             | 0.908  | -0.809 | 6 | 4.208          | 0.842  | -0.207 |
| 1 | -4.764            | -0.124 | 0.001  | 6 | 4.979          | -0.392 | -0.289 |
|   |                   |        |        | 6 | -4.589         | -2.175 | -0.873 |
|   |                   |        |        | 1 | -0.806         | 0.643  | -1.133 |
|   |                   |        |        | 1 | -0.388         | 1.496  | 1.736  |
|   |                   |        |        | 1 | 1.358          | 0.054  | 1.960  |
|   |                   |        |        | 1 | -2.803         | -0.450 | -1.686 |
|   |                   |        |        | 1 | -1.062         | -1.694 | -0.672 |
|   |                   |        |        | 1 | -1.961         | -2.258 | 0.728  |
|   |                   |        |        | 1 | -1.669         | 2.883  | -1.135 |
|   |                   |        |        | 1 | -2.284         | 2.729  | 0.500  |
|   |                   |        |        | 1 | -0.454         | -1.252 | 2.290  |
|   |                   |        |        | 1 | 0.460          | -2.248 | 1.208  |
|   |                   |        |        | 1 | -4.274         | 1.852  | -0.393 |
|   |                   |        |        | 1 | -3.583         | 1.769  | -2.001 |
|   |                   |        |        | 1 | -1.990         | 0.336  | 2.468  |
|   |                   |        |        | 1 | -3.395         | 1.053  | 1.677  |
|   |                   |        |        | 1 | -3.369         | -0.664 | 2.029  |
|   |                   |        |        | 1 | 0.445          | 3.304  | 0.299  |
|   |                   |        |        | 1 | 2.307          | -2.467 | 0.458  |
|   |                   |        |        | 1 | 3.062          | -1.359 | 1.590  |
|   |                   |        |        | 1 | 0.996          | 0.169  | -1.872 |
|   |                   |        |        | 1 | 2.386          | -0.878 | -2.078 |
|   |                   |        |        | 1 | 0.881          | -1.548 | -1.450 |
|   |                   |        |        | 1 | 2.778          | 3.048  | -0.276 |
|   |                   |        |        | 1 | 4.027          | -2.018 | -1.241 |
|   |                   |        |        | 1 | 4.820          | -2.442 | 0.252  |
|   |                   |        |        | 1 | 4.779          | 1.765  | -0.283 |
|   |                   |        |        | 1 | -4.712         | -2.215 | -1.960 |
|   |                   |        |        | 1 | -3.660         | -2.709 | -0.652 |
|   |                   |        |        | 1 | -5.435         | -2.677 | -0.406 |
|   | Difenoxin         |        |        |   | Alosetron      |        |        |
| 8 | 4.250             | 2.409  | 0.364  | 8 | 0.125          | -1.864 | 1.199  |
| 8 | 3.522             | 1.843  | -1.682 | 7 | 1.080          | 0.208  | 0.932  |
| 7 | 0.728             | -0.121 | 0.708  | 7 | -2.674         | 1.519  | -0.183 |
| 7 | -3.380            | -0.292 | 3.208  | 7 | 2.805          | -0.838 | -1.190 |
| 6 | 3.594             | 0.131  | 0.051  | 7 | 4.952          | -0.346 | -1.383 |
| 6 | 3.039             | 0.192  | 1.478  | 6 | -1.374         | 1.241  | 0.157  |
| 6 | 2.596             | -0.666 | -0.805 | 6 | -0.275         | 2.212  | 0.368  |
| 6 | 1.618             | 0.723  | 1.498  | 6 | -1.221         | -0.111 | 0.359  |
| 6 | 1.176             | -0.141 | -0.683 | 6 | 1.043          | 1.468  | 0.194  |
| 6 | -0.647            | 0.345  | 0.829  | 6 | -2.494         | -0.724 | 0.130  |
| 6 | 4.984             | -0.504 | -0.032 | 6 | -3.381         | 0.324  | -0.217 |
| 6 | -1.650            | -0.653 | 0.273  | 6 | 0.024          | -0.698 | 0.841  |
| 6 | 3.752             | 1.532  | -0.539 | 6 | 2.401          | -0.325 | 1.224  |
| 6 | -3.121            | -0.291 | 0.593  | 6 | -3.244         | 2.810  | -0.474 |
| 6 | 5.680             | -0.936 | 1.098  | 6 | -2.978         | -2.035 | 0.175  |
| 6 | 5.590             | -0.659 | -1.284 | 6 | -4.719         | 0.103  | -0.525 |
| 6 | -4.121            | -1.319 | 0.037  | 6 | 3.287          | -0.394 | 0.022  |
| 6 | -3.441            | 1.098  | 0.019  | 6 | -4.313         | -2.261 | -0.128 |
| 6 | 6.936             | -1.523 | 0.978  | 6 | -5.173         | -1.209 | -0.475 |
| 6 | 6.845             | -1.241 | -1.404 | 6 | 4.620          | -0.070 | -0.070 |
| 6 | -3.275            | -0.287 | 2.054  | 6 | 5.607          | 0.437  | 0.913  |
| 6 | 7.523             | -1.679 | -0.271 | 6 | 3.826          | -0.798 | -2.007 |
| 6 | -5.481            | -1.124 | 0.294  | 1 | -0.311         | 3.046  | -0.341 |
| 6 | -3.635            | 2.218  | 0.823  | 1 | -0.345         | 2.652  | 1.374  |
| 6 | -3.731            | -2.418 | -0.724 | 1 | 1.219          | 1.279  | -0.876 |
| 6 | -3.497            | 1.241  | -1.369 | 1 | 1.875          | 2.085  | 0.549  |
| 6 | -6.430            | -2.006 | -0.200 | 1 | 2.231          | -1.322 | 1.642  |
| 6 | -3.876            | 3.464  | 0.248  | 1 | 2.877          | 0.285  | 2.002  |
| 6 | -4.685            | -3.302 | -1.225 | 1 | -2.486         | 3.582  | -0.353 |



|    |              |        |        |   |            |        |        |
|----|--------------|--------|--------|---|------------|--------|--------|
| 6  | -3.732       | 2.483  | -1.942 | 1 | -3.621     | 2.851  | -1.501 |
| 6  | -6.034       | -3.100 | -0.966 | 1 | -4.072     | 3.032  | 0.206  |
| 6  | -3.922       | 3.601  | -1.133 | 1 | -2.310     | -2.845 | 0.445  |
| 1  | 3.037        | -0.824 | 1.889  | 1 | -5.385     | 0.918  | -0.793 |
| 1  | 3.675        | 0.808  | 2.118  | 1 | -4.704     | -3.273 | -0.096 |
| 1  | 2.898        | -0.644 | -1.854 | 1 | -6.212     | -1.422 | -0.707 |
| 1  | 2.631        | -1.710 | -0.473 | 1 | 5.862      | -0.224 | -1.800 |
| 1  | 1.602        | 1.772  | 1.133  | 1 | 6.362      | -0.313 | 1.173  |
| 1  | 1.242        | 0.747  | 2.526  | 1 | 6.139      | 1.320  | 0.546  |
| 1  | 0.508        | -0.786 | -1.262 | 1 | 5.105      | 0.719  | 1.839  |
| 1  | 1.109        | 0.870  | -1.132 | 1 | 3.818      | -1.073 | -3.052 |
| 1  | -0.783       | 1.331  | 0.341  |   |            |        |        |
| 1  | -0.848       | 0.499  | 1.896  |   |            |        |        |
| 1  | -1.423       | -1.646 | 0.675  |   |            |        |        |
| 1  | -1.567       | -0.717 | -0.817 |   |            |        |        |
| 1  | 5.246        | -0.819 | 2.085  |   |            |        |        |
| 1  | 5.075        | -0.306 | -2.174 |   |            |        |        |
| 1  | 4.374        | 3.244  | -0.109 |   |            |        |        |
| 1  | 7.458        | -1.856 | 1.870  |   |            |        |        |
| 1  | 7.295        | -1.350 | -2.385 |   |            |        |        |
| 1  | 8.503        | -2.136 | -0.362 |   |            |        |        |
| 1  | -5.792       | -0.268 | 0.887  |   |            |        |        |
| 1  | -3.596       | 2.121  | 1.904  |   |            |        |        |
| 1  | -2.684       | -2.601 | -0.933 |   |            |        |        |
| 1  | -3.368       | 0.368  | -2.004 |   |            |        |        |
| 1  | -7.481       | -1.840 | 0.012  |   |            |        |        |
| 1  | -4.027       | 4.327  | 0.887  |   |            |        |        |
| 1  | -4.366       | -4.153 | -1.817 |   |            |        |        |
| 1  | -3.773       | 2.579  | -3.022 |   |            |        |        |
| 1  | -6.775       | -3.791 | -1.355 |   |            |        |        |
| 1  | -4.109       | 4.572  | -1.580 |   |            |        |        |
|    | Chlorambucil |        |        |   | Cilostazol |        |        |
| 17 | 3.317        | 3.932  | -0.303 | 8 | -0.562     | 2.482  | 0.668  |
| 17 | 4.321        | -3.231 | -0.769 | 8 | 6.045      | -1.110 | -0.472 |
| 8  | -5.266       | -0.365 | -2.465 | 7 | -3.064     | -1.296 | 0.052  |
| 8  | -5.942       | 1.083  | -0.885 | 7 | -3.785     | -2.407 | 0.336  |
| 7  | 2.157        | 0.080  | 0.048  | 7 | -5.159     | -0.757 | -0.085 |
| 6  | 0.863        | -0.136 | 0.516  | 7 | -5.029     | -2.063 | 0.256  |
| 6  | -3.198       | -0.783 | 1.947  | 7 | 4.392      | 0.413  | -0.744 |
| 6  | -1.785       | -0.576 | 1.476  | 6 | -1.599     | -1.314 | -0.045 |
| 6  | -4.235       | -0.060 | 1.085  | 6 | -1.161     | -1.487 | -1.499 |
| 6  | 2.856        | 1.317  | 0.317  | 6 | -1.007     | -2.403 | 0.842  |
| 6  | 2.856        | -0.931 | -0.714 | 6 | 0.359      | -1.490 | -1.601 |
| 6  | 0.149        | 0.875  | 1.186  | 6 | 0.514      | -2.420 | 0.726  |
| 6  | 0.217        | -1.372 | 0.339  | 6 | 0.965      | -2.576 | -0.722 |
| 6  | -1.138       | 0.649  | 1.650  | 6 | -3.929     | -0.294 | -0.216 |
| 6  | -1.075       | -1.572 | 0.809  | 6 | -3.533     | 1.095  | -0.551 |
| 6  | -4.234       | -0.542 | -0.354 | 6 | -3.355     | 1.975  | 0.689  |
| 6  | 2.502        | 2.385  | -0.705 | 6 | -2.747     | 3.338  | 0.375  |
| 6  | 3.535        | -1.940 | 0.198  | 6 | -1.361     | 3.245  | -0.228 |
| 6  | -5.237       | 0.163  | -1.216 | 6 | 2.604      | 0.734  | 0.849  |
| 1  | -3.300       | -0.438 | 2.982  | 6 | 3.429      | -0.054 | 1.823  |
| 1  | -3.421       | -1.857 | 1.962  | 6 | 3.144      | 0.972  | -0.426 |
| 1  | -4.047       | 1.019  | 1.103  | 6 | 4.230      | -1.141 | 1.119  |
| 1  | -5.233       | -0.192 | 1.515  | 6 | 0.656      | 2.045  | 0.244  |
| 1  | 2.634        | 1.675  | 1.327  | 6 | 1.362      | 1.259  | 1.160  |
| 1  | 3.934        | 1.130  | 0.293  | 6 | 4.996      | -0.636 | -0.082 |
| 1  | 2.170        | -1.444 | -1.396 | 6 | 2.454      | 1.767  | -1.333 |
| 1  | 3.606        | -0.446 | -1.347 | 6 | 1.216      | 2.317  | -1.004 |
| 1  | 0.594        | 1.850  | 1.347  | 1 | -1.257     | -0.331 | 0.316  |
| 1  | 0.720        | -2.193 | -0.159 | 1 | -1.573     | -2.435 | -1.870 |
| 1  | -1.654       | 1.457  | 2.164  | 1 | -1.594     | -0.695 | -2.120 |
| 1  | -1.541       | -2.543 | 0.654  | 1 | -1.421     | -3.368 | 0.530  |
| 1  | -3.247       | -0.407 | -0.815 | 1 | -1.326     | -2.254 | 1.877  |
| 1  | -4.424       | -1.620 | -0.419 | 1 | 0.663      | -1.618 | -2.644 |
| 1  | 1.428        | 2.578  | -0.724 | 1 | 0.745      | -0.511 | -1.285 |
| 1  | 2.823        | 2.100  | -1.708 | 1 | 0.917      | -1.480 | 1.127  |
| 1  | 2.817        | -2.422 | 0.863  | 1 | 0.921      | -3.223 | 1.349  |
| 1  | 4.312        | -1.471 | 0.804  | 1 | 2.058      | -2.549 | -0.792 |
| 1  | -5.923       | 0.143  | -2.961 | 1 | 0.659      | -3.563 | -1.095 |
|    |              |        |        | 1 | -2.603     | 1.065  | -1.129 |
|    |              |        |        | 1 | -4.297     | 1.520  | -1.209 |
|    |              |        |        | 1 | -2.716     | 1.460  | 1.414  |
|    |              |        |        | 1 | -4.327     | 2.102  | 1.175  |
|    |              |        |        | 1 | -2.699     | 3.933  | 1.292  |
|    |              |        |        | 1 | -3.385     | 3.894  | -0.322 |
|    |              |        |        | 1 | -0.917     | 4.239  | -0.376 |
|    |              |        |        | 1 | -1.388     | 2.753  | -1.210 |
|    |              |        |        | 1 | 4.121      | 0.632  | 2.333  |
|    |              |        |        | 1 | 2.798      | -0.482 | 2.608  |
|    |              |        |        | 1 | 3.556      | -1.928 | 0.757  |
|    |              |        |        | 1 | 4.943      | -1.628 | 1.785  |
|    |              |        |        | 1 | 0.917      | 1.074  | 2.134  |
|    |              |        |        | 1 | 4.850      | 0.700  | -1.598 |

|    |                |        |        |            |        |        |        |
|----|----------------|--------|--------|------------|--------|--------|--------|
|    |                |        |        | 1          | 2.881  | 1.961  | -2.313 |
|    |                |        |        | 1          | 0.705  | 2.943  | -1.724 |
|    | Drospirenone   |        |        | Clidinium  |        |        |        |
| 8  | -4.201         | -0.625 | 0.628  | 8          | 0.593  | -1.257 | -0.640 |
| 8  | -6.301         | -1.391 | 0.462  | 8          | -0.650 | -1.632 | 1.197  |
| 8  | 6.664          | -0.754 | -0.879 | 8          | -1.516 | -0.531 | -2.033 |
| 6  | -0.955         | 0.818  | -0.322 | 7          | 3.222  | 0.132  | 0.772  |
| 6  | -1.857         | 2.033  | -0.293 | 6          | 2.890  | -1.745 | -0.946 |
| 6  | -3.267         | 1.498  | -0.222 | 6          | 2.110  | -0.794 | 1.213  |
| 6  | -1.767         | -0.362 | 0.273  | 6          | 1.744  | -1.740 | 0.062  |
| 6  | 0.473          | 0.878  | 0.206  | 6          | 4.494  | -0.675 | 0.628  |
| 6  | -3.192         | -0.023 | -0.239 | 6          | 2.850  | 0.714  | -0.583 |
| 6  | -2.700         | 2.312  | 0.908  | 6          | 4.191  | -1.948 | -0.166 |
| 6  | 1.235          | 2.069  | -0.355 | 6          | 2.938  | -0.381 | -1.643 |
| 6  | 1.179          | -0.447 | -0.156 | 6          | 3.393  | 1.227  | 1.764  |
| 6  | 2.725          | 1.928  | -0.569 | 6          | -0.548 | -1.174 | 0.089  |
| 6  | -1.094         | -1.627 | -0.266 | 6          | -1.555 | -0.257 | -0.635 |
| 6  | 2.170          | 2.828  | 0.521  | 6          | -0.953 | 1.130  | -0.404 |
| 6  | 2.646          | -0.488 | 0.369  | 6          | -2.961 | -0.422 | -0.096 |
| 6  | 0.357          | -1.689 | 0.222  | 6          | -0.756 | 1.588  | 0.903  |
| 6  | -3.577         | -0.549 | -1.629 | 6          | -3.804 | 0.677  | 0.072  |
| 6  | 3.411          | 0.651  | -0.300 | 6          | -0.536 | 1.918  | -1.475 |
| 6  | -1.787         | -0.483 | 1.816  | 6          | -3.469 | -1.707 | 0.118  |
| 6  | 3.297          | -1.824 | -0.035 | 6          | -0.148 | 2.818  | 1.133  |
| 6  | -5.088         | -0.654 | -1.534 | 6          | -5.128 | 0.495  | 0.458  |
| 6  | 2.710          | -0.351 | 1.900  | 6          | 0.066  | 3.153  | -1.241 |
| 6  | -5.321         | -0.948 | -0.069 | 6          | -4.791 | -1.887 | 0.502  |
| 6  | 4.688          | 0.505  | -0.725 | 6          | 0.269  | 3.604  | 0.060  |
| 6  | 4.804          | -1.852 | 0.154  | 6          | -5.623 | -0.786 | 0.676  |
| 6  | 5.494          | -0.695 | -0.531 | 1          | 2.743  | -2.544 | -1.674 |
| 1  | -0.857         | 0.580  | -1.396 | 1          | 1.270  | -0.165 | 1.511  |
| 1  | -1.622         | 2.860  | -0.957 | 1          | 2.471  | -1.330 | 2.094  |
| 1  | -4.062         | 1.953  | -0.806 | 1          | 1.540  | -2.736 | 0.464  |
| 1  | 0.433          | 0.981  | 1.297  | 1          | 4.863  | -0.874 | 1.636  |
| 1  | -2.462         | 1.869  | 1.863  | 1          | 5.212  | -0.019 | 0.128  |
| 1  | -3.097         | 3.318  | 0.986  | 1          | 3.532  | 1.549  | -0.761 |
| 1  | 0.714          | 2.641  | -1.118 | 1          | 1.837  | 1.111  | -0.466 |
| 1  | 1.257          | -0.447 | -1.257 | 1          | 5.019  | -2.160 | -0.844 |
| 1  | 3.149          | 2.475  | -1.405 | 1          | 4.107  | -2.808 | 0.504  |
| 1  | -1.093         | -1.624 | -1.363 | 1          | 2.109  | -0.268 | -2.342 |
| 1  | -1.635         | -2.527 | 0.052  | 1          | 3.866  | -0.297 | -2.216 |
| 1  | 2.270          | 2.509  | 1.552  | 1          | 3.550  | 0.793  | 2.751  |
| 1  | 2.296          | 3.894  | 0.371  | 1          | 4.257  | 1.829  | 1.480  |
| 1  | 0.372          | -1.837 | 1.308  | 1          | 2.492  | 1.841  | 1.760  |
| 1  | 0.828          | -2.578 | -0.205 | 1          | -2.302 | -1.044 | -2.248 |
| 1  | -3.151         | -1.542 | -1.788 | 1          | -1.104 | 0.986  | 1.740  |
| 1  | -3.217         | 0.102  | -2.429 | 1          | -3.428 | 1.680  | -0.103 |
| 1  | -1.893         | -1.535 | 2.093  | 1          | -0.696 | 1.559  | -2.485 |
| 1  | -0.870         | -0.121 | 2.283  | 1          | -2.825 | -2.574 | -0.002 |
| 1  | -2.628         | 0.026  | 2.277  | 1          | -0.026 | 3.177  | 2.151  |
| 1  | 3.065          | -2.015 | -1.092 | 1          | -5.773 | 1.357  | 0.587  |
| 1  | 2.840          | -2.639 | 0.535  | 1          | 0.369  | 3.769  | -2.081 |
| 1  | -5.544         | -1.423 | -2.157 | 1          | -5.171 | -2.889 | 0.672  |
| 1  | -5.593         | 0.289  | -1.772 | 1          | 0.727  | 4.571  | 0.238  |
| 1  | 2.187          | -1.180 | 2.385  | 1          | -6.654 | -0.926 | 0.979  |
| 1  | 3.746          | -0.366 | 2.248  |            |        |        |        |
| 1  | 2.267          | 0.575  | 2.267  |            |        |        |        |
| 1  | 5.189          | 1.330  | -1.226 |            |        |        |        |
| 1  | 5.243          | -2.783 | -0.212 |            |        |        |        |
| 1  | 5.066          | -1.801 | 1.219  |            |        |        |        |
|    | Acetophenazine |        |        | Citalopram |        |        |        |
| 16 | 2.123          | 0.509  | -2.185 | 9          | -1.197 | 5.330  | -0.281 |
| 8  | -6.291         | -0.489 | -1.293 | 8          | 0.135  | -0.450 | 1.737  |
| 8  | -3.042         | 3.613  | 0.783  | 7          | -4.521 | -1.908 | -0.432 |
| 7  | -0.242         | -2.049 | 0.299  | 7          | 6.702  | -1.770 | -0.665 |
| 7  | -3.040         | -1.740 | -0.175 | 6          | 0.139  | -0.114 | 0.332  |
| 7  | 1.886          | 0.097  | 0.791  | 6          | -0.793 | -1.085 | -0.413 |
| 6  | -1.220         | -2.594 | 1.224  | 6          | 1.576  | -0.356 | -0.071 |
| 6  | -0.772         | -2.064 | -1.052 | 6          | 2.224  | -1.050 | 0.944  |
| 6  | -2.484         | -1.761 | 1.169  | 6          | -2.251 | -0.979 | 0.003  |
| 6  | -2.040         | -1.238 | -1.116 | 6          | -0.264 | 1.342  | 0.180  |
| 6  | 1.080          | -2.636 | 0.416  | 6          | 1.253  | -1.268 | 2.059  |
| 6  | 1.782          | -2.198 | 1.699  | 6          | -3.088 | -2.091 | -0.607 |
| 6  | -4.258         | -0.946 | -0.200 | 6          | 2.237  | -0.020 | -1.243 |
| 6  | 1.574          | -0.709 | 1.967  | 6          | 3.547  | -1.432 | 0.812  |
| 6  | -5.004         | -1.043 | -1.515 | 6          | -0.696 | 1.837  | -1.053 |
| 6  | 0.918          | 0.956  | 0.246  | 6          | -0.157 | 2.227  | 1.253  |
| 6  | 3.206          | 0.108  | 0.312  | 6          | 3.567  | -0.390 | -1.391 |
| 6  | 0.934          | 1.267  | -1.125 | 6          | 4.224  | -1.095 | -0.370 |
| 6  | 3.470          | 0.352  | -1.046 | 6          | -1.008 | 3.181  | -1.220 |
| 6  | -0.093         | 1.520  | 1.028  | 6          | -0.472 | 3.572  | 1.107  |
| 6  | 4.293          | -0.135 | 1.159  | 6          | -0.890 | 4.027  | -0.131 |
| 6  | -0.034         | 2.105  | -1.679 | 6          | -4.910 | -1.928 | 0.965  |
| 6  | -1.093         | 2.323  | 0.469  | 6          | -5.251 | -2.916 | -1.174 |

|   |           |        |        |   |            |        |        |
|---|-----------|--------|--------|---|------------|--------|--------|
| 6 | 4.776     | 0.389  | -1.523 | 6 | 5.589      | -1.465 | -0.533 |
| 6 | -1.055    | 2.615  | -0.896 | 1 | -0.685     | -0.935 | -1.495 |
| 6 | 5.594     | -0.136 | 0.669  | 1 | -0.420     | -2.100 | -0.224 |
| 6 | 5.844     | 0.133  | -0.670 | 1 | -2.300     | -1.009 | 1.097  |
| 6 | -2.207    | 2.881  | 1.285  | 1 | -2.666     | -0.011 | -0.300 |
| 6 | -2.284    | 2.507  | 2.745  | 1 | 0.955      | -2.326 | 2.136  |
| 1 | -1.456    | -3.652 | 0.992  | 1 | 1.634      | -0.964 | 3.040  |
| 1 | -0.813    | -2.570 | 2.241  | 1 | -2.896     | -2.137 | -1.687 |
| 1 | -0.020    | -1.635 | -1.723 | 1 | -2.756     | -3.070 | -0.196 |
| 1 | -0.983    | -3.096 | -1.398 | 1 | 1.734      | 0.536  | -2.029 |
| 1 | -3.239    | -2.168 | 1.851  | 1 | 4.067      | -1.974 | 1.595  |
| 1 | -2.241    | -0.733 | 1.515  | 1 | -0.803     | 1.170  | -1.903 |
| 1 | -1.793    | -0.179 | -0.903 | 1 | 0.165      | 1.847  | 2.216  |
| 1 | -2.450    | -1.284 | -2.130 | 1 | 4.114      | -0.135 | -2.292 |
| 1 | 1.064     | -3.741 | 0.350  | 1 | -1.348     | 3.572  | -2.172 |
| 1 | 1.660     | -2.282 | -0.445 | 1 | -0.399     | 4.265  | 1.937  |
| 1 | 1.412     | -2.752 | 2.569  | 1 | -4.449     | -1.101 | 1.508  |
| 1 | 2.847     | -2.442 | 1.621  | 1 | -4.630     | -2.872 | 1.473  |
| 1 | -4.060    | 0.120  | 0.032  | 1 | -5.993     | -1.814 | 1.043  |
| 1 | -4.923    | -1.319 | 0.587  | 1 | -5.045     | -3.945 | -0.821 |
| 1 | 0.520     | -0.550 | 2.189  | 1 | -4.986     | -2.866 | -2.233 |
| 1 | 2.137     | -0.379 | 2.849  | 1 | -6.326     | -2.741 | -1.083 |
| 1 | -5.063    | -2.099 | -1.820 |   |            |        |        |
| 1 | -4.476    | -0.494 | -2.308 |   |            |        |        |
| 1 | -0.105    | 1.323  | 2.093  |   |            |        |        |
| 1 | 4.120     | -0.326 | 2.211  |   |            |        |        |
| 1 | 0.013     | 2.330  | -2.739 |   |            |        |        |
| 1 | 4.947     | 0.597  | -2.574 |   |            |        |        |
| 1 | -6.732    | -0.403 | -2.141 |   |            |        |        |
| 1 | -1.832    | 3.245  | -1.315 |   |            |        |        |
| 1 | 6.416     | -0.338 | 1.348  |   |            |        |        |
| 1 | 6.858     | 0.141  | -1.054 |   |            |        |        |
| 1 | -1.389    | 2.832  | 3.284  |   |            |        |        |
| 1 | -2.353    | 1.421  | 2.867  |   |            |        |        |
| 1 | -3.159    | 2.974  | 3.193  |   |            |        |        |
|   | Chenodiol |        |        |   | Diphenidol |        |        |
| 8 | 2.192     | 2.216  | -1.281 | 8 | 1.362      | -0.302 | 1.975  |
| 8 | 6.044     | -0.765 | -2.244 | 7 | -3.497     | -0.790 | 0.130  |
| 8 | -7.732    | -0.146 | 0.686  | 6 | -3.843     | 0.565  | -0.292 |
| 8 | -5.972    | 1.243  | 0.553  | 6 | -4.504     | -1.738 | -0.335 |
| 6 | -0.148    | 0.828  | -0.229 | 6 | -2.178     | -1.187 | -0.339 |
| 6 | -1.053    | -0.353 | 0.179  | 6 | -5.196     | 0.987  | 0.255  |
| 6 | 1.168     | 0.900  | 0.531  | 6 | -5.880     | -1.406 | 0.215  |
| 6 | 1.955     | -0.410 | 0.327  | 6 | -6.282     | 0.010  | -0.169 |
| 6 | 3.298     | -0.401 | 1.112  | 6 | -1.034     | -0.409 | 0.289  |
| 6 | -2.283    | -0.075 | -0.726 | 6 | 0.314      | -0.993 | -0.100 |
| 6 | 4.139     | 0.817  | 0.647  | 6 | 1.512      | -0.278 | 0.546  |
| 6 | -0.264    | -1.632 | -0.110 | 6 | 1.522      | 1.189  | 0.137  |
| 6 | 1.087     | -1.642 | 0.608  | 6 | 2.852      | -0.921 | 0.187  |
| 6 | 1.994     | 2.131  | 0.137  | 6 | 1.784      | 1.524  | -1.193 |
| 6 | -1.078    | 2.035  | -0.199 | 6 | 3.992      | -0.485 | 0.870  |
| 6 | -2.424    | 1.471  | -0.689 | 6 | 1.242      | 2.206  | 1.047  |
| 6 | 3.364     | 2.129  | 0.796  | 6 | 2.997      | -1.907 | -0.788 |
| 6 | 4.124     | -1.678 | 0.871  | 6 | 1.761      | 2.849  | -1.609 |
| 6 | -1.463    | -0.285 | 1.654  | 6 | 5.240      | -1.024 | 0.592  |
| 6 | -3.605    | -0.782 | -0.402 | 6 | 1.222      | 3.534  | 0.631  |
| 6 | 4.710     | 0.642  | -0.766 | 6 | 4.250      | -2.449 | -1.070 |
| 6 | 3.060     | -0.315 | 2.625  | 6 | 1.478      | 3.861  | -0.695 |
| 6 | 4.636     | -1.838 | -0.553 | 6 | 5.374      | -2.011 | -0.382 |
| 6 | 5.498     | -0.645 | -0.933 | 1 | -3.852     | 0.633  | -1.402 |
| 6 | -4.688    | -0.369 | -1.411 | 1 | -3.067     | 1.251  | 0.057  |
| 6 | -3.480    | -2.301 | -0.361 | 1 | -4.194     | -2.741 | -0.024 |
| 6 | -6.106    | -0.653 | -0.947 | 1 | -4.546     | -1.751 | -1.447 |
| 6 | -6.550    | 0.259  | 0.162  | 1 | -2.112     | -1.118 | -1.447 |
| 1 | 0.104     | 0.631  | -1.286 | 1 | -2.059     | -2.252 | -0.099 |
| 1 | 0.936     | 1.025  | 1.599  | 1 | -5.425     | 2.003  | -0.085 |
| 1 | 2.203     | -0.435 | -0.746 | 1 | -5.138     | 1.023  | 1.350  |
| 1 | -1.990    | -0.378 | -1.746 | 1 | -5.857     | -1.501 | 1.307  |
| 1 | 5.004     | 0.872  | 1.329  | 1 | -6.608     | -2.136 | -0.154 |
| 1 | -0.102    | -1.700 | -1.196 | 1 | -7.247     | 0.279  | 0.274  |
| 1 | -0.823    | -2.529 | 0.172  | 1 | -6.414     | 0.066  | -1.259 |
| 1 | 0.918     | -1.739 | 1.687  | 1 | -1.145     | -0.413 | 1.378  |
| 1 | 1.629     | -2.547 | 0.314  | 1 | -1.067     | 0.642  | -0.019 |
| 1 | 1.450     | 3.031  | 0.468  | 1 | 0.425      | -0.961 | -1.192 |
| 1 | -0.724    | 2.869  | -0.815 | 1 | 0.356      | -2.056 | 0.177  |
| 1 | -1.157    | 2.429  | 0.821  | 1 | 1.473      | -1.216 | 2.255  |
| 1 | -3.247    | 1.759  | -0.026 | 1 | 2.023      | 0.738  | -1.907 |
| 1 | -2.683    | 1.866  | -1.674 | 1 | 3.884      | 0.287  | 1.627  |
| 1 | 3.216     | 2.345  | 1.860  | 1 | 1.037      | 1.948  | 2.079  |
| 1 | 3.950     | 2.962  | 0.393  | 1 | 2.134      | -2.266 | -1.339 |
| 1 | 3.557     | -2.560 | 1.186  | 1 | 1.970      | 3.093  | -2.646 |
| 1 | 4.992     | -1.638 | 1.545  | 1 | 6.113      | -0.672 | 1.133  |
| 1 | -0.602    | -0.272 | 2.327  | 1 | 1.004      | 4.318  | 1.350  |
| 1 | -2.061    | 0.603  | 1.873  | 1 | 4.343      | -3.217 | -1.832 |

|            |        |        |        |                      |        |        |        |
|------------|--------|--------|--------|----------------------|--------|--------|--------|
| 1          | -2.067 | -1.155 | 1.928  | 1                    | 1.463  | 4.898  | -1.017 |
| 1          | -3.930 | -0.428 | 0.588  | 1                    | 6.349  | -2.434 | -0.602 |
| 1          | 3.900  | 0.657  | -1.505 |                      |        |        |        |
| 1          | 5.347  | 1.500  | -1.010 |                      |        |        |        |
| 1          | 4.016  | -0.223 | 3.150  |                      |        |        |        |
| 1          | 2.446  | 0.537  | 2.925  |                      |        |        |        |
| 1          | 2.573  | -1.218 | 3.005  |                      |        |        |        |
| 1          | 5.215  | -2.761 | -0.657 |                      |        |        |        |
| 1          | 3.799  | -1.916 | -1.262 |                      |        |        |        |
| 1          | 6.378  | -0.626 | -0.274 |                      |        |        |        |
| 1          | -4.612 | 0.700  | -1.625 |                      |        |        |        |
| 1          | -4.506 | -0.889 | -2.360 |                      |        |        |        |
| 1          | 1.332  | 2.356  | -1.688 |                      |        |        |        |
| 1          | -3.001 | -2.679 | -1.272 |                      |        |        |        |
| 1          | -2.890 | -2.648 | 0.489  |                      |        |        |        |
| 1          | -4.457 | -2.787 | -0.284 |                      |        |        |        |
| 1          | 5.317  | -0.663 | -2.866 |                      |        |        |        |
| 1          | -6.826 | -0.526 | -1.764 |                      |        |        |        |
| 1          | -6.245 | -1.688 | -0.616 |                      |        |        |        |
| 1          | -7.965 | 0.497  | 1.370  |                      |        |        |        |
| Doxylamine |        |        |        | Cevimeline           |        |        |        |
| 8          | 0.496  | -0.956 | 0.249  | 16                   | 2.441  | -1.153 | -0.266 |
| 7          | 4.159  | -0.974 | 0.201  | 8                    | 0.904  | 0.837  | 0.517  |
| 7          | -0.987 | 2.229  | 0.909  | 7                    | -2.344 | 0.401  | 0.897  |
| 6          | -0.607 | -0.190 | 0.744  | 6                    | 0.001  | -0.275 | 0.386  |
| 6          | -1.867 | -0.867 | 0.215  | 6                    | -0.710 | -0.255 | -0.982 |
| 6          | -0.540 | 1.223  | 0.153  | 6                    | -1.089 | -0.090 | 1.461  |
| 6          | -0.621 | -0.169 | 2.269  | 6                    | -1.898 | -1.222 | -0.932 |
| 6          | 1.774  | -0.549 | 0.705  | 6                    | -1.259 | 1.156  | -1.215 |
| 6          | 2.788  | -1.146 | -0.250 | 6                    | -2.931 | -0.661 | 0.072  |
| 6          | -3.112 | -0.292 | 0.483  | 6                    | -2.061 | 1.563  | 0.043  |
| 6          | -1.813 | -2.042 | -0.533 | 6                    | 0.883  | -1.503 | 0.603  |
| 6          | -0.067 | 1.408  | -1.149 | 6                    | 2.012  | 0.672  | -0.323 |
| 6          | -4.280 | -0.884 | 0.023  | 6                    | 3.137  | 1.556  | 0.143  |
| 6          | -2.986 | -2.635 | -0.994 | 1                    | -0.010 | -0.550 | -1.771 |
| 6          | -0.046 | 2.690  | -1.675 | 1                    | -1.291 | -1.041 | 1.966  |
| 6          | -4.221 | -2.061 | -0.718 | 1                    | -0.718 | 0.613  | 2.214  |
| 6          | 4.561  | 0.421  | 0.198  | 1                    | -1.567 | -2.224 | -0.639 |
| 6          | 5.062  | -1.760 | -0.616 | 1                    | -2.332 | -1.326 | -1.932 |
| 6          | -0.968 | 3.458  | 0.384  | 1                    | -1.898 | 1.146  | -2.105 |
| 6          | -0.507 | 3.745  | -0.893 | 1                    | -0.453 | 1.868  | -1.411 |
| 1          | 0.230  | 0.388  | 2.668  | 1                    | -3.798 | -0.236 | -0.444 |
| 1          | -0.590 | -1.194 | 2.644  | 1                    | -3.310 | -1.446 | 0.735  |
| 1          | -1.523 | 0.317  | 2.638  | 1                    | -1.497 | 2.281  | 0.645  |
| 1          | 1.842  | 0.549  | 0.721  | 1                    | -3.012 | 2.034  | -0.222 |
| 1          | 1.967  | -0.908 | 1.726  | 1                    | 1.072  | -1.651 | 1.670  |
| 1          | 2.586  | -2.219 | -0.331 | 1                    | 0.431  | -2.411 | 0.200  |
| 1          | 2.629  | -0.718 | -1.262 | 1                    | 1.742  | 0.894  | -1.367 |
| 1          | -3.160 | 0.635  | 1.051  | 1                    | 4.018  | 1.423  | -0.487 |
| 1          | -0.850 | -2.489 | -0.746 | 1                    | 2.835  | 2.606  | 0.090  |
| 1          | 0.274  | 0.551  | -1.720 | 1                    | 3.406  | 1.319  | 1.173  |
| 1          | -5.239 | -0.425 | 0.241  |                      |        |        |        |
| 1          | -2.931 | -3.552 | -1.572 |                      |        |        |        |
| 1          | 0.318  | 2.866  | -2.683 |                      |        |        |        |
| 1          | -5.134 | -2.526 | -1.079 |                      |        |        |        |
| 1          | 3.960  | 1.002  | 0.901  |                      |        |        |        |
| 1          | 4.468  | 0.890  | -0.801 |                      |        |        |        |
| 1          | 5.604  | 0.502  | 0.511  |                      |        |        |        |
| 1          | 6.083  | -1.664 | -0.239 |                      |        |        |        |
| 1          | 5.064  | -1.450 | -1.679 |                      |        |        |        |
| 1          | 4.781  | -2.815 | -0.574 |                      |        |        |        |
| 1          | -1.341 | 4.254  | 1.026  |                      |        |        |        |
| 1          | -0.511 | 4.764  | -1.264 |                      |        |        |        |
| Clemastine |        |        |        | Bromodiphenhydramine |        |        |        |
| 17         | -2.359 | 4.820  | -0.467 | 35                   | 5.263  | -0.894 | -0.156 |
| 8          | 0.112  | -1.315 | 0.107  | 8                    | -1.533 | -0.730 | 0.056  |
| 7          | 4.730  | -0.250 | -0.940 | 7                    | -5.029 | -1.799 | -0.213 |
| 6          | 3.647  | -0.112 | 0.035  | 6                    | -0.765 | 0.282  | 0.684  |
| 6          | 4.268  | -0.684 | 1.313  | 6                    | 0.698  | -0.032 | 0.467  |
| 6          | 5.784  | -0.471 | 1.147  | 6                    | -1.126 | 1.665  | 0.177  |
| 6          | 5.916  | 0.192  | -0.220 | 6                    | -2.918 | -0.638 | 0.340  |
| 6          | 2.366  | -0.797 | -0.406 | 6                    | -3.576 | -1.867 | -0.251 |
| 6          | 1.267  | -0.679 | 0.627  | 6                    | 1.664  | 0.791  | 1.049  |
| 6          | 4.521  | 0.485  | -2.167 | 6                    | 1.113  | -1.114 | -0.305 |
| 6          | -1.125 | -0.987 | 0.754  | 6                    | -1.561 | 2.657  | 1.051  |
| 6          | -1.438 | 0.488  | 0.500  | 6                    | -1.033 | 1.952  | -1.186 |
| 6          | -2.188 | -1.855 | 0.085  | 6                    | -5.604 | -2.879 | -0.989 |
| 6          | -1.058 | -1.339 | 2.240  | 6                    | -5.541 | -1.826 | 1.145  |
| 6          | -1.880 | 1.360  | 1.491  | 6                    | 3.018  | 0.542  | 0.874  |
| 6          | -1.290 | 0.980  | -0.800 | 6                    | 2.467  | -1.373 | -0.495 |
| 6          | -3.537 | -1.620 | 0.364  | 6                    | -1.892 | 3.924  | 0.577  |
| 6          | -1.850 | -2.897 | -0.776 | 6                    | -1.371 | 3.211  | -1.663 |
| 6          | -2.169 | 2.692  | 1.204  | 6                    | 3.411  | -0.544 | 0.097  |
| 6          | -1.567 | 2.304  | -1.106 | 6                    | -1.798 | 4.202  | -0.781 |

|           |        |        |        |            |        |        |        |
|-----------|--------|--------|--------|------------|--------|--------|--------|
| 6         | -4.527 | -2.413 | -0.200 | 1          | -0.971 | 0.260  | 1.771  |
| 6         | -2.844 | -3.689 | -1.345 | 1          | -3.063 | -0.579 | 1.431  |
| 6         | -2.008 | 3.153  | -0.094 | 1          | -3.354 | 0.272  | -0.098 |
| 6         | -4.183 | -3.453 | -1.059 | 1          | -3.267 | -1.943 | -1.298 |
| 1         | 3.434  | 0.970  | 0.194  | 1          | -3.191 | -2.773 | 0.260  |
| 1         | 4.030  | -1.750 | 1.393  | 1          | 1.354  | 1.646  | 1.644  |
| 1         | 3.867  | -0.201 | 2.208  | 1          | 0.368  | -1.758 | -0.757 |
| 1         | 6.214  | 0.146  | 1.939  | 1          | -1.644 | 2.432  | 2.112  |
| 1         | 6.314  | -1.427 | 1.165  | 1          | -0.696 | 1.176  | -1.869 |
| 1         | 5.924  | 1.297  | -0.117 | 1          | -6.693 | -2.791 | -0.997 |
| 1         | 6.824  | -0.087 | -0.764 | 1          | -5.349 | -3.881 | -0.593 |
| 1         | 2.000  | -0.364 | -1.343 | 1          | -5.251 | -2.826 | -2.022 |
| 1         | 2.575  | -1.855 | -0.606 | 1          | -5.206 | -0.950 | 1.705  |
| 1         | 1.570  | -1.150 | 1.574  | 1          | -5.229 | -2.730 | 1.703  |
| 1         | 1.061  | 0.382  | 0.843  | 1          | -6.633 | -1.805 | 1.124  |
| 1         | 4.367  | 1.567  | -1.990 | 1          | 3.762  | 1.184  | 1.331  |
| 1         | 3.653  | 0.101  | -2.706 | 1          | 2.785  | -2.216 | -1.098 |
| 1         | 5.391  | 0.370  | -2.819 | 1          | -2.229 | 4.690  | 1.268  |
| 1         | -0.360 | -0.695 | 2.782  | 1          | -1.297 | 3.425  | -2.724 |
| 1         | -0.735 | -2.376 | 2.348  | 1          | -2.058 | 5.187  | -1.154 |
| 1         | -2.039 | -1.246 | 2.710  |            |        |        |        |
| 1         | -2.006 | 1.012  | 2.511  |            |        |        |        |
| 1         | -0.946 | 0.307  | -1.579 |            |        |        |        |
| 1         | -3.813 | -0.798 | 1.020  |            |        |        |        |
| 1         | -0.806 | -3.079 | -0.998 |            |        |        |        |
| 1         | -2.512 | 3.366  | 1.980  |            |        |        |        |
| 1         | -1.449 | 2.681  | -2.115 |            |        |        |        |
| 1         | -5.570 | -2.215 | 0.026  |            |        |        |        |
| 1         | -2.566 | -4.496 | -2.016 |            |        |        |        |
| 1         | -4.956 | -4.071 | -1.505 |            |        |        |        |
| Buclizine |        |        |        | Duloxetine |        |        |        |
| 17        | -7.767 | -2.307 | 0.071  | 16         | 2.370  | 2.128  | 0.389  |
| 7         | -1.387 | -0.089 | 0.001  | 8          | -0.266 | -0.796 | 0.089  |
| 7         | 1.187  | -1.370 | 0.110  | 7          | 4.172  | -2.560 | 0.317  |
| 6         | -1.166 | -1.432 | -0.536 | 6          | 1.056  | -0.369 | 0.437  |
| 6         | -0.142 | 0.668  | -0.128 | 6          | 1.945  | -1.568 | 0.137  |
| 6         | -0.051 | -2.126 | 0.215  | 6          | 3.414  | -1.324 | 0.426  |
| 6         | 0.978  | -0.020 | 0.620  | 6          | 1.439  | 0.861  | -0.335 |
| 6         | -2.505 | 0.579  | -0.670 | 6          | -1.333 | -0.046 | 0.482  |
| 6         | 2.281  | -2.041 | 0.796  | 6          | -2.596 | -0.540 | 0.038  |
| 6         | -3.801 | -0.191 | -0.491 | 6          | -3.777 | 0.165  | 0.419  |
| 6         | -2.705 | 1.992  | -0.153 | 6          | 1.168  | 1.144  | -1.646 |
| 6         | 3.620  | -1.414 | 0.518  | 6          | -1.257 | 1.094  | 1.253  |
| 6         | 7.529  | 0.316  | -0.362 | 6          | -2.711 | -1.700 | -0.761 |
| 6         | 6.168  | -0.291 | -0.023 | 6          | -3.668 | 1.329  | 1.219  |
| 6         | 3.970  | -1.021 | -0.776 | 6          | -2.436 | 1.774  | 1.620  |
| 6         | 4.554  | -1.230 | 1.531  | 6          | -5.028 | -0.328 | -0.022 |
| 6         | -4.739 | -0.232 | -1.520 | 6          | 1.714  | 2.381  | -2.071 |
| 6         | -4.110 | -0.816 | 0.719  | 6          | 2.397  | 3.025  | -1.080 |
| 6         | -2.923 | 3.042  | -1.043 | 6          | 5.594  | -2.355 | 0.518  |
| 6         | -2.722 | 2.255  | 1.218  | 6          | -3.943 | -2.149 | -1.172 |
| 6         | 5.216  | -0.472 | -1.036 | 6          | -5.112 | -1.457 | -0.799 |
| 6         | 5.808  | -0.682 | 1.266  | 1          | 1.092  | -0.156 | 1.517  |
| 6         | 8.430  | 0.435  | 0.866  | 1          | 1.807  | -1.837 | -0.918 |
| 6         | 8.236  | -0.572 | -1.397 | 1          | 1.593  | -2.417 | 0.731  |
| 6         | 7.329  | 1.718  | -0.954 | 1          | 3.537  | -0.946 | 1.452  |
| 6         | -5.961 | -0.874 | -1.359 | 1          | 3.802  | -0.526 | -0.235 |
| 6         | -5.323 | -1.467 | 0.898  | 1          | 0.576  | 0.486  | -2.271 |
| 6         | -3.158 | 4.332  | -0.576 | 1          | 4.018  | -2.957 | -0.605 |
| 6         | -2.950 | 3.542  | 1.687  | 1          | -0.301 | 1.486  | 1.575  |
| 6         | -6.242 | -1.488 | -0.145 | 1          | -1.808 | -2.230 | -1.042 |
| 6         | -3.172 | 4.586  | 0.791  | 1          | -4.572 | 1.859  | 1.502  |
| 1         | -0.910 | -1.385 | -1.613 | 1          | -2.352 | 2.669  | 2.228  |
| 1         | -2.086 | -2.014 | -0.445 | 1          | -5.926 | 0.210  | 0.268  |
| 1         | 0.141  | 0.779  | -1.194 | 1          | 1.604  | 2.782  | -3.071 |
| 1         | -0.287 | 1.672  | 0.276  | 1          | 2.913  | 3.973  | -1.121 |
| 1         | -0.356 | -2.257 | 1.273  | 1          | 6.131  | -3.294 | 0.370  |
| 1         | 0.112  | -3.125 | -0.203 | 1          | 5.772  | -2.034 | 1.549  |
| 1         | 1.906  | 0.548  | 0.504  | 1          | 6.040  | -1.593 | -0.144 |
| 1         | 0.735  | -0.040 | 1.702  | 1          | -4.018 | -3.041 | -1.785 |
| 1         | -2.310 | 0.651  | -1.760 | 1          | -6.081 | -1.820 | -1.128 |
| 1         | 2.283  | -3.085 | 0.452  |            |        |        |        |
| 1         | 2.113  | -2.082 | 1.891  |            |        |        |        |
| 1         | 3.244  | -1.142 | -1.575 |            |        |        |        |
| 1         | 4.299  | -1.516 | 2.549  |            |        |        |        |
| 1         | -4.512 | 0.249  | -2.469 |            |        |        |        |
| 1         | -3.377 | -0.805 | 1.520  |            |        |        |        |
| 1         | -2.905 | 2.846  | -2.112 |            |        |        |        |
| 1         | -2.538 | 1.441  | 1.913  |            |        |        |        |
| 1         | 5.455  | -0.176 | -2.054 |            |        |        |        |
| 1         | 6.504  | -0.557 | 2.088  |            |        |        |        |
| 1         | 9.393  | 0.869  | 0.581  |            |        |        |        |
| 1         | 7.994  | 1.082  | 1.632  |            |        |        |        |
| 1         | 8.632  | -0.539 | 1.321  |            |        |        |        |

|    |                    |        |        |   |               |        |        |
|----|--------------------|--------|--------|---|---------------|--------|--------|
| 1  | 7.655              | -0.662 | -2.318 |   |               |        |        |
| 1  | 9.212              | -0.152 | -1.660 |   |               |        |        |
| 1  | 8.397              | -1.581 | -1.007 |   |               |        |        |
| 1  | 8.293              | 2.168  | -1.209 |   |               |        |        |
| 1  | 6.725              | 1.692  | -1.865 |   |               |        |        |
| 1  | 6.826              | 2.378  | -0.242 |   |               |        |        |
| 1  | -6.686             | -0.905 | -2.163 |   |               |        |        |
| 1  | -5.559             | -1.958 | 1.835  |   |               |        |        |
| 1  | -3.325             | 5.140  | -1.281 |   |               |        |        |
| 1  | -2.954             | 3.735  | 2.755  |   |               |        |        |
| 1  | -3.352             | 5.591  | 1.158  |   |               |        |        |
|    | Dexbrompheniramine |        |        |   | Bethanechol   |        |        |
| 35 | -5.074             | -0.105 | -0.049 | 8 | 1.381         | 0.446  | -0.520 |
| 7  | 3.712              | -1.781 | -0.114 | 8 | 1.529         | -1.101 | 1.144  |
| 7  | 1.672              | 1.783  | 0.910  | 7 | -1.685        | -0.312 | -0.077 |
| 6  | 1.129              | -0.383 | -0.061 | 7 | 2.996         | -1.083 | -0.609 |
| 6  | 1.668              | -1.146 | 1.158  | 6 | -0.977        | 1.015  | -0.320 |
| 6  | 3.184              | -1.270 | 1.147  | 6 | 0.422         | 1.201  | 0.241  |
| 6  | -0.381             | -0.298 | -0.049 | 6 | -1.688        | -0.664 | 1.383  |
| 6  | 1.781              | 0.982  | -0.159 | 6 | -3.100        | -0.143 | -0.544 |
| 6  | -1.122             | -0.837 | -1.101 | 6 | -1.063        | -1.435 | -0.856 |
| 6  | -1.074             | 0.303  | 1.006  | 6 | 0.808         | 2.663  | 0.136  |
| 6  | 2.486              | 1.358  | -1.303 | 6 | 1.959         | -0.621 | 0.115  |
| 6  | 3.336              | -3.163 | -0.338 | 1 | -0.977        | 1.164  | -1.403 |
| 6  | 5.150              | -1.620 | -0.172 | 1 | -1.630        | 1.771  | 0.124  |
| 6  | -2.512             | -0.787 | -1.113 | 1 | 0.471         | 0.867  | 1.281  |
| 6  | -2.462             | 0.365  | 1.010  | 1 | -2.107        | 0.171  | 1.944  |
| 6  | 3.087              | 2.608  | -1.346 | 1 | -2.311        | -1.548 | 1.517  |
| 6  | -3.173             | -0.183 | -0.052 | 1 | -0.666        | -0.877 | 1.695  |
| 6  | 2.249              | 2.984  | 0.853  | 1 | -3.096        | 0.118  | -1.602 |
| 6  | 2.966              | 3.446  | -0.245 | 1 | -3.633        | -1.080 | -0.395 |
| 1  | 1.424              | -0.937 | -0.958 | 1 | -3.574        | 0.650  | 0.034  |
| 1  | 1.372              | -0.620 | 2.071  | 1 | -0.937        | -1.121 | -1.891 |
| 1  | 1.189              | -2.130 | 1.201  | 1 | -0.110        | -1.696 | -0.406 |
| 1  | 3.513              | -1.895 | 2.002  | 1 | -1.734        | -2.292 | -0.804 |
| 1  | 3.626              | -0.279 | 1.304  | 1 | 0.769         | 3.010  | -0.900 |
| 1  | -0.602             | -1.309 | -1.932 | 1 | 1.825         | 2.804  | 0.500  |
| 1  | -0.515             | 0.745  | 1.825  | 1 | 0.145         | 3.288  | 0.737  |
| 1  | 2.569              | 0.666  | -2.135 | 1 | 3.386         | -0.524 | -1.351 |
| 1  | 2.249              | -3.263 | -0.391 | 1 | 3.561         | -1.810 | -0.204 |
| 1  | 3.700              | -3.842 | 0.456  |   |               |        |        |
| 1  | 3.748              | -3.507 | -1.290 |   |               |        |        |
| 1  | 5.408              | -0.562 | -0.067 |   |               |        |        |
| 1  | 5.526              | -1.968 | -1.138 |   |               |        |        |
| 1  | 5.683              | -2.180 | 0.620  |   |               |        |        |
| 1  | -3.073             | -1.212 | -1.938 |   |               |        |        |
| 1  | -2.989             | 0.836  | 1.832  |   |               |        |        |
| 1  | 3.642              | 2.923  | -2.224 |   |               |        |        |
| 1  | 2.137              | 3.609  | 1.737  |   |               |        |        |
| 1  | 3.417              | 4.432  | -0.231 |   |               |        |        |
|    | Bexarotene         |        |        |   | Acetaminophen |        |        |
| 8  | -5.965             | -1.557 | -1.883 | 8 | 3.963         | -0.236 | 0.000  |
| 8  | -7.132             | -0.469 | -0.298 | 8 | -2.509        | -1.434 | 0.000  |
| 6  | 3.571              | 1.272  | -0.958 | 7 | -1.537        | 0.639  | 0.000  |
| 6  | 3.845              | -1.589 | 0.132  | 6 | -0.161        | 0.340  | 0.000  |
| 6  | 4.900              | 0.522  | -0.793 | 6 | 0.348         | -0.961 | 0.000  |
| 6  | 4.742              | -0.975 | -0.952 | 6 | 0.733         | 1.417  | 0.000  |
| 6  | 2.468              | 0.568  | -0.170 | 6 | 1.723         | -1.161 | 0.000  |
| 6  | 2.589              | -0.742 | 0.320  | 6 | 2.102         | 1.213  | 0.000  |
| 6  | 3.778              | 2.706  | -0.460 | 6 | 2.606         | -0.086 | 0.000  |
| 6  | 3.173              | 1.321  | -2.440 | 6 | -2.611        | -0.220 | 0.000  |
| 6  | 3.491              | -3.015 | -0.305 | 6 | -3.953        | 0.470  | 0.000  |
| 6  | 4.603              | -1.660 | 1.466  | 1 | -0.332        | -1.800 | 0.000  |
| 6  | 1.263              | 1.243  | 0.049  | 1 | 0.347         | 2.433  | 0.000  |
| 6  | 1.519              | -1.277 | 1.049  | 1 | -1.755        | 1.624  | -0.001 |
| 6  | 0.191              | 0.693  | 0.747  | 1 | 2.111         | -2.177 | 0.000  |
| 6  | 0.325              | -0.605 | 1.277  | 1 | 2.791         | 2.050  | 0.000  |
| 6  | -1.045             | 1.493  | 0.934  | 1 | -4.517        | 0.147  | 0.877  |
| 6  | -0.754             | -1.249 | 2.097  | 1 | -4.517        | 0.145  | -0.876 |
| 6  | -2.330             | 0.911  | 0.493  | 1 | -3.900        | 1.560  | -0.001 |
| 6  | -0.983             | 2.735  | 1.440  | 1 | 4.171         | -1.174 | 0.000  |
| 6  | -3.537             | 1.232  | 1.131  |   |               |        |        |
| 6  | -2.369             | 0.023  | -0.591 |   |               |        |        |
| 6  | -4.736             | 0.700  | 0.694  |   |               |        |        |
| 6  | -3.568             | -0.509 | -1.037 |   |               |        |        |
| 6  | -4.765             | -0.175 | -0.397 |   |               |        |        |
| 6  | -6.069             | -0.720 | -0.819 |   |               |        |        |
| 1  | 5.315              | 0.747  | 0.198  |   |               |        |        |
| 1  | 5.623              | 0.917  | -1.516 |   |               |        |        |
| 1  | 4.315              | -1.199 | -1.937 |   |               |        |        |
| 1  | 5.718              | -1.475 | -0.929 |   |               |        |        |
| 1  | 3.977              | 2.728  | 0.616  |   |               |        |        |
| 1  | 4.636              | 3.158  | -0.969 |   |               |        |        |
| 1  | 2.915              | 3.348  | -0.654 |   |               |        |        |

|    |             |        |        |   |                |        |        |
|----|-------------|--------|--------|---|----------------|--------|--------|
| 1  | 3.938       | 1.839  | -3.029 |   |                |        |        |
| 1  | 3.040       | 0.321  | -2.861 |   |                |        |        |
| 1  | 2.229       | 1.857  | -2.573 |   |                |        |        |
| 1  | 4.405       | -3.574 | -0.528 |   |                |        |        |
| 1  | 2.953       | -3.570 | 0.467  |   |                |        |        |
| 1  | 2.873       | -3.011 | -1.208 |   |                |        |        |
| 1  | 5.501       | -2.280 | 1.367  |   |                |        |        |
| 1  | 4.912       | -0.671 | 1.814  |   |                |        |        |
| 1  | 3.978       | -2.099 | 2.248  |   |                |        |        |
| 1  | 1.135       | 2.244  | -0.355 |   |                |        |        |
| 1  | 1.625       | -2.273 | 1.473  |   |                |        |        |
| 1  | -1.232      | -0.534 | 2.773  |   |                |        |        |
| 1  | -1.552      | -1.667 | 1.473  |   |                |        |        |
| 1  | -0.351      | -2.066 | 2.699  |   |                |        |        |
| 1  | -0.040      | 3.157  | 1.770  |   |                |        |        |
| 1  | -1.863      | 3.365  | 1.524  |   |                |        |        |
| 1  | -3.521      | 1.887  | 1.997  |   |                |        |        |
| 1  | -1.440      | -0.244 | -1.087 |   |                |        |        |
| 1  | -5.671      | 0.937  | 1.190  |   |                |        |        |
| 1  | -3.586      | -1.188 | -1.882 |   |                |        |        |
| 1  | -6.865      | -1.852 | -2.077 |   |                |        |        |
|    | Almotriptan |        |        |   | Diethylpropion |        |        |
| 16 | 2.097       | 0.036  | 0.791  | 8 | -0.251         | 2.591  | -0.087 |
| 8  | 2.292       | 0.997  | 1.862  | 7 | 1.462          | -0.367 | 0.243  |
| 8  | 1.204       | -1.103 | 0.917  | 6 | 1.247          | 0.801  | -0.619 |
| 7  | 3.601       | -0.571 | 0.428  | 6 | 1.426          | -0.048 | 1.673  |
| 7  | -3.617      | 2.923  | 0.111  | 6 | 2.646          | -1.149 | -0.094 |
| 7  | -3.483      | -3.017 | 0.010  | 6 | -0.130         | 1.402  | -0.317 |
| 6  | 3.726       | -1.620 | -0.604 | 6 | 2.333          | 1.867  | -0.569 |
| 6  | 4.744       | 0.359  | 0.383  | 6 | 0.899          | -1.206 | 2.500  |
| 6  | 4.901       | -1.154 | -1.452 | 6 | 2.648          | -1.677 | -1.514 |
| 6  | 5.767       | -0.404 | -0.445 | 6 | -1.318         | 0.500  | -0.302 |
| 6  | 1.578       | 0.966  | -0.699 | 6 | -1.323         | -0.764 | -0.903 |
| 6  | 0.220       | 1.558  | -0.518 | 6 | -2.480         | 0.961  | 0.324  |
| 6  | -2.171      | 1.300  | -0.433 | 6 | -2.470         | -1.546 | -0.879 |
| 6  | -0.906      | 0.759  | -0.676 | 6 | -3.620         | 0.170  | 0.367  |
| 6  | -3.494      | 0.751  | -0.477 | 6 | -3.616         | -1.085 | -0.237 |
| 6  | -2.279      | 2.660  | -0.053 | 1 | 1.178          | 0.418  | -1.648 |
| 6  | 0.083       | 2.903  | -0.120 | 1 | 2.421          | 0.264  | 2.039  |
| 6  | -3.823      | -0.673 | -0.771 | 1 | 0.773          | 0.819  | 1.819  |
| 6  | -1.159      | 3.473  | 0.106  | 1 | 3.578          | -0.581 | 0.095  |
| 6  | -4.341      | 1.771  | -0.136 | 1 | 2.674          | -1.996 | 0.600  |
| 6  | -3.369      | -1.604 | 0.354  | 1 | 3.303          | 1.449  | -0.849 |
| 6  | -3.413      | -3.838 | 1.205  | 1 | 2.104          | 2.688  | -1.250 |
| 6  | -2.445      | -3.419 | -0.923 | 1 | 2.417          | 2.296  | 0.432  |
| 1  | 2.795       | -1.738 | -1.166 | 1 | -0.115         | -1.468 | 2.188  |
| 1  | 3.927       | -2.582 | -0.119 | 1 | 1.520          | -2.100 | 2.397  |
| 1  | 5.077       | 0.599  | 1.394  | 1 | 0.877          | -0.947 | 3.561  |
| 1  | 4.473       | 1.306  | -0.108 | 1 | 1.723          | -2.216 | -1.736 |
| 1  | 4.553       | -0.465 | -2.231 | 1 | 2.764          | -0.883 | -2.257 |
| 1  | 5.418       | -1.978 | -1.947 | 1 | 3.480          | -2.370 | -1.659 |
| 1  | 6.308       | -1.114 | 0.189  | 1 | -0.426         | -1.135 | -1.385 |
| 1  | 6.504       | 0.257  | -0.906 | 1 | -2.463         | 1.948  | 0.775  |
| 1  | 2.348       | 1.725  | -0.861 | 1 | -2.470         | -2.521 | -1.356 |
| 1  | 1.612       | 0.239  | -1.516 | 1 | -4.513         | 0.531  | 0.866  |
| 1  | -0.795      | -0.285 | -0.958 | 1 | -4.507         | -1.704 | -0.208 |
| 1  | -4.897      | -0.803 | -0.935 |   |                |        |        |
| 1  | -3.337      | -0.968 | -1.709 |   |                |        |        |
| 1  | 0.979       | 3.501  | 0.021  |   |                |        |        |
| 1  | -1.248      | 4.512  | 0.407  |   |                |        |        |
| 1  | -5.418      | 1.774  | -0.048 |   |                |        |        |
| 1  | -4.009      | 3.803  | 0.398  |   |                |        |        |
| 1  | -3.996      | -1.419 | 1.234  |   |                |        |        |
| 1  | -2.334      | -1.350 | 0.660  |   |                |        |        |
| 1  | -4.218      | -3.566 | 1.891  |   |                |        |        |
| 1  | -2.453      | -3.733 | 1.745  |   |                |        |        |
| 1  | -3.534      | -4.891 | 0.939  |   |                |        |        |
| 1  | -2.559      | -4.478 | -1.167 |   |                |        |        |
| 1  | -1.427      | -3.267 | -0.516 |   |                |        |        |
| 1  | -2.522      | -2.857 | -1.856 |   |                |        |        |
|    | Calcitriol  |        |        |   | Altretamine    |        |        |
| 8  | 8.391       | -2.064 | -0.133 | 7 | 2.086          | 1.658  | -0.098 |
| 8  | -8.452      | 0.679  | -0.098 | 7 | -2.480         | 0.974  | -0.099 |
| 8  | -5.430      | -1.433 | 1.966  | 7 | 0.395          | -2.633 | 0.102  |
| 6  | 0.854       | 1.266  | 0.294  | 7 | -0.205         | 1.365  | -0.051 |
| 6  | 2.176       | 0.473  | 0.446  | 7 | 1.285          | -0.505 | 0.000  |
| 6  | 0.076       | 0.305  | -0.652 | 7 | -1.080         | -0.859 | 0.000  |
| 6  | 1.712       | -1.003 | 0.538  | 6 | 1.016          | 0.808  | -0.042 |
| 6  | 0.284       | -1.069 | -0.036 | 6 | -1.208         | 0.475  | -0.042 |
| 6  | 0.951       | 2.622  | -0.411 | 6 | 0.192          | -1.283 | 0.023  |
| 6  | 3.132       | 0.850  | 1.585  | 6 | 1.911          | 3.087  | 0.022  |
| 6  | -1.295      | 0.805  | -0.978 | 6 | 3.435          | 1.169  | 0.067  |
| 6  | 0.146       | 1.403  | 1.644  | 6 | -3.626         | 0.110  | 0.065  |
| 6  | -0.427      | 3.162  | -0.795 | 6 | -2.734         | 2.390  | 0.026  |

|    |              |        |        |    |               |        |        |
|----|--------------|--------|--------|----|---------------|--------|--------|
| 6  | -1.249       | 2.164  | -1.618 | 6  | -0.705        | -3.561 | -0.027 |
| 6  | 4.338        | -0.100 | 1.651  | 6  | 1.719         | -3.196 | -0.024 |
| 6  | 3.593        | 2.304  | 1.531  | 1  | 2.064         | 3.431  | 1.054  |
| 6  | -2.418       | 0.101  | -0.717 | 1  | 0.907         | 3.363  | -0.288 |
| 6  | 5.237        | -0.112 | 0.420  | 1  | 2.642         | 3.595  | -0.614 |
| 6  | 6.429        | -1.039 | 0.599  | 1  | 3.776         | 1.254  | 1.108  |
| 6  | -3.774       | 0.533  | -0.941 | 1  | 4.111         | 1.758  | -0.558 |
| 6  | 7.381        | -1.145 | -0.591 | 1  | 3.487         | 0.124  | -0.229 |
| 6  | -4.901       | -0.198 | -0.775 | 1  | -4.448        | 0.479  | -0.555 |
| 6  | -6.261       | 0.422  | -0.948 | 1  | -3.974        | 0.086  | 1.108  |
| 6  | 6.694        | -1.728 | -1.820 | 1  | -3.372        | -0.903 | -0.236 |
| 6  | 8.032        | 0.193  | -0.921 | 1  | -2.985        | 2.670  | 1.058  |
| 6  | -4.923       | -1.620 | -0.391 | 1  | -3.578        | 2.665  | -0.613 |
| 6  | -7.178       | 0.131  | 0.231  | 1  | -1.854        | 2.950  | -0.278 |
| 6  | -5.889       | -1.972 | 0.719  | 1  | -0.526        | -4.426 | 0.617  |
| 6  | -7.262       | -1.370 | 0.479  | 1  | -0.813        | -3.923 | -1.059 |
| 6  | -4.177       | -2.571 | -0.964 | 1  | -1.632        | -3.076 | 0.267  |
| 1  | 2.716        | 0.609  | -0.505 | 1  | 2.462         | -2.465 | 0.282  |
| 1  | 0.651        | 0.330  | -1.596 | 1  | 1.936         | -3.502 | -1.058 |
| 1  | 2.401        | -1.666 | 0.005  | 1  | 1.797         | -4.082 | 0.612  |
| 1  | 1.726        | -1.336 | 1.582  |    |               |        |        |
| 1  | 0.147        | -1.877 | -0.760 |    |               |        |        |
| 1  | -0.444       | -1.245 | 0.763  |    |               |        |        |
| 1  | 1.466        | 3.361  | 0.210  |    |               |        |        |
| 1  | 1.562        | 2.500  | -1.317 |    |               |        |        |
| 1  | 2.582        | 0.709  | 2.528  |    |               |        |        |
| 1  | -0.902       | 1.690  | 1.528  |    |               |        |        |
| 1  | 0.632        | 2.162  | 2.265  |    |               |        |        |
| 1  | 0.160        | 0.466  | 2.210  |    |               |        |        |
| 1  | -0.984       | 3.423  | 0.113  |    |               |        |        |
| 1  | -0.317       | 4.096  | -1.355 |    |               |        |        |
| 1  | -0.772       | 2.057  | -2.605 |    |               |        |        |
| 1  | -2.248       | 2.563  | -1.809 |    |               |        |        |
| 1  | 4.944        | 0.174  | 2.525  |    |               |        |        |
| 1  | 3.993        | -1.123 | 1.846  |    |               |        |        |
| 1  | 2.790        | 2.999  | 1.787  |    |               |        |        |
| 1  | 4.410        | 2.482  | 2.237  |    |               |        |        |
| 1  | 3.954        | 2.579  | 0.534  |    |               |        |        |
| 1  | -2.298       | -0.889 | -0.282 |    |               |        |        |
| 1  | 4.655        | -0.421 | -0.458 |    |               |        |        |
| 1  | 5.584        | 0.907  | 0.206  |    |               |        |        |
| 1  | 7.019        | -0.721 | 1.467  |    |               |        |        |
| 1  | 6.078        | -2.052 | 0.832  |    |               |        |        |
| 1  | -3.918       | 1.572  | -1.233 |    |               |        |        |
| 1  | -6.752       | 0.011  | -1.843 |    |               |        |        |
| 1  | -6.180       | 1.502  | -1.099 |    |               |        |        |
| 1  | 5.921        | -1.060 | -2.211 |    |               |        |        |
| 1  | 7.417        | -1.891 | -2.626 |    |               |        |        |
| 1  | 6.232        | -2.690 | -1.583 |    |               |        |        |
| 1  | 8.785        | 0.072  | -1.706 |    |               |        |        |
| 1  | 7.303        | 0.922  | -1.283 |    |               |        |        |
| 1  | 8.528        | 0.607  | -0.039 |    |               |        |        |
| 1  | -6.774       | 0.621  | 1.129  |    |               |        |        |
| 1  | -5.965       | -3.068 | 0.792  |    |               |        |        |
| 1  | -7.902       | -1.583 | 1.343  |    |               |        |        |
| 1  | -7.721       | -1.846 | -0.395 |    |               |        |        |
| 1  | 9.027        | -2.178 | -0.845 |    |               |        |        |
| 1  | -4.251       | -3.608 | -0.647 |    |               |        |        |
| 1  | -3.492       | -2.351 | -1.777 |    |               |        |        |
| 1  | -9.024       | 0.576  | 0.667  |    |               |        |        |
| 1  | -4.501       | -1.666 | 2.060  |    |               |        |        |
|    | Clotrimazole |        |        |    | Ethchlorvynol |        |        |
| 17 | 1.491        | -0.026 | 2.366  | 17 | -3.103        | -0.265 | -0.183 |
| 7  | -0.785       | -0.069 | -1.670 | 8  | 0.930         | 0.118  | 1.535  |
| 7  | -1.952       | -0.962 | -3.352 | 6  | 0.994         | -0.081 | 0.119  |
| 6  | -0.221       | 0.030  | -0.289 | 6  | 1.714         | 1.107  | -0.559 |
| 6  | 0.816        | -1.094 | -0.088 | 6  | 1.040         | 2.440  | -0.298 |
| 6  | -1.433       | -0.112 | 0.647  | 6  | -0.422        | -0.195 | -0.388 |
| 6  | 0.505        | 1.388  | -0.168 | 6  | 1.718         | -1.321 | -0.183 |
| 6  | 1.630        | -1.174 | 1.054  | 6  | -1.479        | -0.158 | 0.410  |
| 6  | 1.028        | -2.066 | -1.070 | 6  | 2.343         | -2.322 | -0.425 |
| 6  | -2.545       | 0.710  | 0.427  | 1  | 2.748         | 1.114  | -0.194 |
| 6  | -0.012       | 2.477  | 0.531  | 1  | 1.776         | 0.899  | -1.634 |
| 6  | -1.516       | -1.080 | 1.646  | 1  | 0.038         | 2.474  | -0.733 |
| 6  | 1.762        | 1.524  | -0.767 | 1  | 1.619         | 3.258  | -0.730 |
| 6  | -0.344       | 0.535  | -2.830 | 1  | 0.940         | 2.624  | 0.773  |
| 6  | -1.746       | -0.967 | -2.055 | 1  | -0.532        | -0.299 | -1.463 |
| 6  | -1.081       | -0.023 | -3.840 | 1  | 1.806         | -0.058 | 1.891  |
| 6  | 2.586        | -2.172 | 1.210  | 1  | -1.411        | -0.058 | 1.485  |
| 6  | 1.980        | -3.068 | -0.927 | 1  | 2.881         | -3.214 | -0.634 |
| 6  | -3.686       | 0.596  | 1.208  |    |               |        |        |
| 6  | 0.698        | 3.671  | 0.615  |    |               |        |        |
| 6  | -2.663       | -1.199 | 2.428  |    |               |        |        |
| 6  | 2.470        | 2.716  | -0.688 |    |               |        |        |



|   |                  |        |        |   |            |        |        |
|---|------------------|--------|--------|---|------------|--------|--------|
| 6 | 2.763            | -3.124 | 0.217  |   |            |        |        |
| 6 | -3.747           | -0.359 | 2.219  |   |            |        |        |
| 6 | 1.939            | 3.799  | 0.005  |   |            |        |        |
| 1 | 0.439            | -2.036 | -1.979 |   |            |        |        |
| 1 | -2.521           | 1.431  | -0.384 |   |            |        |        |
| 1 | -0.958           | 2.394  | 1.052  |   |            |        |        |
| 1 | -0.694           | -1.765 | 1.815  |   |            |        |        |
| 1 | 2.197            | 0.680  | -1.294 |   |            |        |        |
| 1 | 0.401            | 1.311  | -2.828 |   |            |        |        |
| 1 | -2.256           | -1.593 | -1.337 |   |            |        |        |
| 1 | -1.040           | 0.215  | -4.893 |   |            |        |        |
| 1 | 3.185            | -2.188 | 2.113  |   |            |        |        |
| 1 | 2.108            | -3.799 | -1.718 |   |            |        |        |
| 1 | -4.535           | 1.245  | 1.016  |   |            |        |        |
| 1 | 0.278            | 4.501  | 1.175  |   |            |        |        |
| 1 | -2.705           | -1.962 | 3.198  |   |            |        |        |
| 1 | 3.444            | 2.794  | -1.161 |   |            |        |        |
| 1 | 3.512            | -3.899 | 0.342  |   |            |        |        |
| 1 | -4.641           | -0.455 | 2.827  |   |            |        |        |
| 1 | 2.492            | 4.729  | 0.076  |   |            |        |        |
|   | Albuterol        |        |        |   | Cycrimine  |        |        |
| 8 | 0.454            | 3.201  | 0.075  | 8 | -2.067     | 0.146  | 1.867  |
| 8 | -3.340           | -1.787 | 0.732  | 7 | 2.291      | -1.119 | 0.161  |
| 8 | -4.547           | -0.098 | -1.025 | 6 | -2.183     | -0.860 | -0.346 |
| 7 | 2.590            | 0.196  | 0.488  | 6 | -1.326     | -0.061 | 0.650  |
| 6 | 2.872            | -0.966 | -0.380 | 6 | -2.528     | -2.284 | 0.133  |
| 6 | 2.058            | 1.395  | -0.137 | 6 | -3.546     | -0.190 | -0.657 |
| 6 | 0.888            | 1.980  | 0.670  | 6 | -3.915     | -2.554 | -0.439 |
| 6 | 3.508            | -2.019 | 0.522  | 6 | -4.613     | -1.211 | -0.256 |
| 6 | 1.556            | -1.505 | -0.936 | 6 | -0.024     | -0.804 | 0.998  |
| 6 | 3.829            | -0.621 | -1.527 | 6 | 0.876      | -1.130 | -0.193 |
| 6 | -0.275           | 1.031  | 0.712  | 6 | -0.978     | 1.337  | 0.153  |
| 6 | -1.224           | 1.026  | -0.306 | 6 | 2.782      | 0.253  | 0.283  |
| 6 | -0.384           | 0.078  | 1.724  | 6 | 3.083      | -1.848 | -0.825 |
| 6 | -2.259           | 0.093  | -0.342 | 6 | 4.231      | 0.280  | 0.738  |
| 6 | -2.356           | -0.850 | 0.695  | 6 | 4.545      | -1.908 | -0.418 |
| 6 | -1.415           | -0.850 | 1.722  | 6 | 5.109      | -0.507 | -0.225 |
| 6 | -3.200           | 0.052  | -1.504 | 6 | -0.949     | 1.675  | -1.201 |
| 1 | 2.824            | 2.179  | -0.268 | 6 | -0.590     | 2.304  | 1.085  |
| 1 | 1.683            | 1.174  | -1.143 | 6 | -0.534     | 2.939  | -1.613 |
| 1 | 3.431            | 0.422  | 1.008  | 6 | -0.178     | 3.566  | 0.676  |
| 1 | 1.237            | 2.159  | 1.701  | 6 | -0.144     | 3.888  | -0.677 |
| 1 | 4.448            | -1.655 | 0.950  | 1 | -1.605     | -0.958 | -1.273 |
| 1 | 3.732            | -2.931 | -0.037 | 1 | -2.591     | -2.320 | 1.230  |
| 1 | 2.836            | -2.274 | 1.345  | 1 | -1.778     | -3.024 | -0.158 |
| 1 | 1.059            | -0.784 | -1.591 | 1 | -3.621     | 0.039  | -1.725 |
| 1 | 0.864            | -1.748 | -0.126 | 1 | -3.657     | 0.757  | -0.123 |
| 1 | 1.737            | -2.409 | -1.526 | 1 | -4.428     | -3.390 | 0.044  |
| 1 | 3.407            | 0.145  | -2.184 | 1 | -3.839     | -2.796 | -1.507 |
| 1 | 4.042            | -1.498 | -2.145 | 1 | -5.539     | -1.115 | -0.829 |
| 1 | 4.782            | -0.245 | -1.142 | 1 | -4.874     | -1.079 | 0.801  |
| 1 | -1.155           | 1.770  | -1.096 | 1 | 0.520      | -0.190 | 1.720  |
| 1 | 0.352            | 0.065  | 2.522  | 1 | -0.276     | -1.732 | 1.527  |
| 1 | 1.227            | 3.759  | -0.045 | 1 | 0.682      | -0.426 | -1.027 |
| 1 | -1.515           | -1.583 | 2.515  | 1 | 0.633      | -2.126 | -0.580 |
| 1 | -3.102           | 0.969  | -2.098 | 1 | 2.146      | 0.799  | 0.986  |
| 1 | -2.956           | -0.798 | -2.161 | 1 | 2.685      | 0.781  | -0.691 |
| 1 | -4.055           | -1.481 | 0.151  | 1 | 2.999      | -1.373 | -1.827 |
| 1 | -5.127           | -0.211 | -1.783 | 1 | 2.666      | -2.856 | -0.919 |
|   |                  |        |        | 1 | -2.108     | -0.699 | 2.325  |
|   |                  |        |        | 1 | 4.296      | -0.157 | 1.741  |
|   |                  |        |        | 1 | 4.569      | 1.318  | 0.819  |
|   |                  |        |        | 1 | 5.114      | -2.460 | -1.173 |
|   |                  |        |        | 1 | 4.627      | -2.471 | 0.520  |
|   |                  |        |        | 1 | 5.133      | 0.009  | -1.195 |
|   |                  |        |        | 1 | 6.144      | -0.547 | 0.130  |
|   |                  |        |        | 1 | -1.252     | 0.953  | -1.951 |
|   |                  |        |        | 1 | -0.625     | 2.055  | 2.140  |
|   |                  |        |        | 1 | -0.519     | 3.179  | -2.672 |
|   |                  |        |        | 1 | 0.116      | 4.303  | 1.418  |
|   |                  |        |        | 1 | 0.178      | 4.873  | -0.999 |
|   | Diphenylpyraline |        |        |   | Dronabinol |        |        |
| 8 | 0.145            | -0.935 | 0.263  | 8 | -0.734     | 1.871  | -0.647 |
| 7 | 4.296            | -0.954 | -0.233 | 8 | -0.501     | -2.598 | 1.037  |
| 6 | 1.477            | -0.431 | 0.195  | 6 | -2.848     | 0.885  | -0.094 |
| 6 | 2.082            | -0.501 | -1.200 | 6 | -2.203     | -0.371 | 0.500  |
| 6 | 2.300            | -1.259 | 1.161  | 6 | -1.962     | 2.112  | 0.100  |
| 6 | 3.549            | -0.108 | -1.153 | 6 | -4.278     | 0.989  | 0.419  |
| 6 | 3.759            | -0.842 | 1.117  | 6 | -0.743     | -0.435 | 0.115  |
| 6 | -0.822           | -0.232 | -0.500 | 6 | -5.102     | -0.178 | -0.117 |
| 6 | 5.705            | -0.625 | -0.257 | 6 | -3.042     | -1.564 | 0.104  |
| 6 | -2.155           | -0.922 | -0.314 | 6 | -4.349     | -1.479 | -0.169 |
| 6 | -0.902           | 1.232  | -0.110 | 6 | -0.109     | 0.677  | -0.461 |
| 6 | -3.228           | -0.552 | -1.127 | 6 | -2.542     | 3.352  | -0.554 |

|            |        |        |        |                  |        |        |        |
|------------|--------|--------|--------|------------------|--------|--------|--------|
| 6          | -0.754 | 2.237  | -1.063 | 6                | -1.601 | 2.382  | 1.554  |
| 6          | -2.350 | -1.897 | 0.662  | 6                | 0.067  | -1.554 | 0.355  |
| 6          | -1.123 | 1.588  | 1.222  | 6                | 1.222  | 0.628  | -0.885 |
| 6          | -4.474 | -1.145 | -0.971 | 6                | -5.154 | -2.674 | -0.565 |
| 6          | -0.832 | 3.579  | -0.699 | 6                | 1.979  | -0.521 | -0.704 |
| 6          | -3.599 | -2.491 | 0.820  | 6                | 1.393  | -1.611 | -0.058 |
| 6          | -1.194 | 2.924  | 1.590  | 6                | 3.425  | -0.562 | -1.110 |
| 6          | -4.663 | -2.119 | 0.007  | 6                | 4.370  | -0.149 | 0.019  |
| 6          | -1.051 | 3.924  | 0.629  | 6                | 5.835  | -0.185 | -0.383 |
| 1          | 1.484  | 0.623  | 0.529  | 6                | 6.783  | 0.225  | 0.734  |
| 1          | 1.555  | 0.166  | -1.891 | 6                | 8.244  | 0.187  | 0.322  |
| 1          | 1.980  | -1.523 | -1.582 | 1                | -2.896 | 0.736  | -1.185 |
| 1          | 2.209  | -2.315 | 0.883  | 1                | -2.252 | -0.289 | 1.601  |
| 1          | 1.902  | -1.152 | 2.174  | 1                | -4.741 | 1.937  | 0.127  |
| 1          | 4.000  | -0.198 | -2.147 | 1                | -4.270 | 0.970  | 1.517  |
| 1          | 3.637  | 0.962  | -0.864 | 1                | -5.461 | 0.053  | -1.132 |
| 1          | 3.863  | 0.198  | 1.496  | 1                | -6.017 | -0.308 | 0.477  |
| 1          | 4.357  | -1.476 | 1.779  | 1                | -2.556 | -2.532 | 0.061  |
| 1          | -0.563 | -0.280 | -1.572 | 1                | -2.868 | 3.141  | -1.575 |
| 1          | 6.102  | -0.751 | -1.268 | 1                | -3.395 | 3.731  | 0.013  |
| 1          | 6.256  | -1.293 | 0.410  | 1                | -1.786 | 4.138  | -0.593 |
| 1          | 5.910  | 0.416  | 0.060  | 1                | -1.002 | 3.293  | 1.633  |
| 1          | -3.084 | 0.214  | -1.886 | 1                | -2.503 | 2.516  | 2.157  |
| 1          | -0.574 | 1.963  | -2.101 | 1                | -1.023 | 1.562  | 1.985  |
| 1          | -1.514 | -2.190 | 1.287  | 1                | 1.649  | 1.513  | -1.345 |
| 1          | -1.236 | 0.803  | 1.966  | 1                | -5.627 | -2.527 | -1.544 |
| 1          | -5.298 | -0.849 | -1.612 | 1                | -5.971 | -2.858 | 0.142  |
| 1          | -0.717 | 4.352  | -1.451 | 1                | -4.545 | -3.578 | -0.619 |
| 1          | -3.739 | -3.251 | 1.582  | 1                | 1.976  | -2.510 | 0.133  |
| 1          | -1.365 | 3.192  | 2.628  | 1                | 3.689  | -1.573 | -1.445 |
| 1          | -5.636 | -2.585 | 0.131  | 1                | 3.585  | 0.098  | -1.971 |
| 1          | -1.110 | 4.969  | 0.918  | 1                | 4.206  | -0.804 | 0.885  |
|            |        |        |        | 1                | 4.102  | 0.860  | 0.359  |
|            |        |        |        | 1                | 0.166  | -3.282 | 1.148  |
|            |        |        |        | 1                | 6.095  | -1.196 | -0.729 |
|            |        |        |        | 1                | 5.992  | 0.469  | -1.253 |
|            |        |        |        | 1                | 6.624  | -0.430 | 1.601  |
|            |        |        |        | 1                | 6.520  | 1.234  | 1.078  |
|            |        |        |        | 1                | 8.437  | 0.859  | -0.520 |
|            |        |        |        | 1                | 8.908  | 0.484  | 1.137  |
|            |        |        |        | 1                | 8.541  | -0.818 | 0.007  |
| Cinacalcet |        |        |        | Chlorphentermine |        |        |        |
| 9          | -7.114 | 1.304  | 0.405  | 17               | 4.122  | 0.010  | 0.389  |
| 9          | -5.233 | 2.017  | 1.212  | 7                | -4.070 | 0.049  | -0.414 |
| 9          | -5.689 | 2.311  | -0.880 | 6                | -2.718 | 0.010  | 0.172  |
| 7          | 1.434  | -1.468 | 1.092  | 6                | -1.750 | -0.023 | -1.033 |
| 6          | 2.880  | -1.464 | 0.878  | 6                | -2.507 | -1.209 | 1.072  |
| 6          | 0.664  | -1.299 | -0.131 | 6                | -2.540 | 1.289  | 0.980  |
| 6          | 3.390  | -0.060 | 0.604  | 6                | -0.288 | -0.018 | -0.696 |
| 6          | -0.825 | -1.275 | 0.158  | 6                | 0.412  | 1.183  | -0.545 |
| 6          | -1.665 | -1.087 | -1.105 | 6                | 0.418  | -1.209 | -0.510 |
| 6          | 4.634  | 0.143  | -0.068 | 6                | 1.760  | 1.204  | -0.212 |
| 6          | 3.565  | -2.049 | 2.109  | 6                | 1.767  | -1.214 | -0.177 |
| 6          | 5.103  | 1.482  | -0.271 | 6                | 2.428  | -0.001 | -0.027 |
| 6          | -3.138 | -1.073 | -0.815 | 1                | -1.984 | -0.918 | -1.624 |
| 6          | 2.679  | 1.034  | 1.048  | 1                | -1.995 | 0.837  | -1.666 |
| 6          | 5.444  | -0.920 | -0.543 | 1                | -1.506 | -1.228 | 1.514  |
| 6          | 4.330  | 2.569  | 0.199  | 1                | -3.230 | -1.206 | 1.893  |
| 6          | 3.143  | 2.348  | 0.848  | 1                | -2.643 | -2.140 | 0.512  |
| 6          | -3.793 | 0.115  | -0.503 | 1                | -1.547 | 1.342  | 1.433  |
| 6          | 6.334  | 1.692  | -0.936 | 1                | -3.274 | 1.335  | 1.791  |
| 6          | -3.878 | -2.260 | -0.800 | 1                | -2.685 | 2.170  | 0.349  |
| 6          | -5.151 | 0.119  | -0.188 | 1                | -4.757 | 0.076  | 0.335  |
| 6          | 6.637  | -0.681 | -1.183 | 1                | -4.247 | -0.821 | -0.912 |
| 6          | 7.089  | 0.637  | -1.384 | 1                | -0.109 | 2.124  | -0.699 |
| 6          | -5.231 | -2.258 | -0.486 | 1                | -0.097 | -2.158 | -0.634 |
| 6          | -5.877 | -1.066 | -0.177 | 1                | 2.293  | 2.141  | -0.101 |
| 6          | -5.802 | 1.427  | 0.137  | 1                | 2.305  | -2.144 | -0.039 |
| 1          | 3.134  | -2.094 | 0.006  |                  |        |        |        |
| 1          | 0.890  | -2.078 | -0.885 |                  |        |        |        |
| 1          | 0.965  | -0.347 | -0.588 |                  |        |        |        |
| 1          | -1.042 | -0.474 | 0.874  |                  |        |        |        |
| 1          | -1.124 | -2.209 | 0.654  |                  |        |        |        |
| 1          | 1.175  | -2.347 | 1.530  |                  |        |        |        |
| 1          | -1.374 | -0.150 | -1.595 |                  |        |        |        |
| 1          | -1.436 | -1.889 | -1.817 |                  |        |        |        |
| 1          | 4.651  | -2.031 | 2.003  |                  |        |        |        |
| 1          | 3.259  | -3.087 | 2.276  |                  |        |        |        |
| 1          | 3.302  | -1.466 | 2.995  |                  |        |        |        |
| 1          | 1.739  | 0.858  | 1.563  |                  |        |        |        |
| 1          | 5.121  | -1.945 | -0.402 |                  |        |        |        |
| 1          | 4.698  | 3.579  | 0.038  |                  |        |        |        |
| 1          | 2.554  | 3.184  | 1.211  |                  |        |        |        |
| 1          | -3.242 | 1.052  | -0.509 |                  |        |        |        |

|   |          |        |        |   |                  |        |        |
|---|----------|--------|--------|---|------------------|--------|--------|
| 1 | 6.673    | 2.714  | -1.083 |   |                  |        |        |
| 1 | -3.382   | -3.196 | -1.043 |   |                  |        |        |
| 1 | 7.235    | -1.515 | -1.537 |   |                  |        |        |
| 1 | 8.032    | 0.815  | -1.890 |   |                  |        |        |
| 1 | -5.789   | -3.188 | -0.485 |   |                  |        |        |
| 1 | -6.933   | -1.053 | 0.065  |   |                  |        |        |
|   | Bepridil |        |        |   | Dextromethorphan |        |        |
| 8 | -1.949   | 1.415  | -0.546 | 8 | -4.054           | 0.120  | 0.653  |
| 7 | -2.789   | -1.128 | 0.625  | 7 | 2.681            | -1.422 | 0.510  |
| 7 | 0.806    | -0.705 | -0.349 | 6 | 0.773            | 0.755  | 0.735  |
| 6 | -1.686   | -0.955 | -0.312 | 6 | 1.930            | 0.754  | -0.286 |
| 6 | -4.129   | -0.970 | 0.071  | 6 | 2.238            | -0.685 | -0.684 |
| 6 | -2.816   | -2.449 | 1.247  | 6 | 1.232            | -0.072 | 1.952  |
| 6 | -5.035   | -1.475 | 1.188  | 6 | 0.519            | 2.206  | 1.168  |
| 6 | -4.178   | -2.516 | 1.935  | 6 | 1.640            | 1.667  | -1.476 |
| 6 | -0.383   | -0.762 | 0.481  | 6 | -0.457           | 0.084  | 0.128  |
| 6 | -1.889   | 0.204  | -1.269 | 6 | 1.036            | -1.288 | -1.425 |
| 6 | 1.355    | 0.602  | -0.631 | 6 | 1.678            | -1.470 | 1.567  |
| 6 | 1.509    | -1.855 | -0.673 | 6 | 0.224            | 3.130  | -0.006 |
| 6 | -2.027   | 2.548  | -1.384 | 6 | 1.360            | 3.094  | -1.022 |
| 6 | -1.940   | 3.806  | -0.538 | 6 | -0.310           | -0.910 | -0.858 |
| 6 | 2.423    | 1.098  | 0.321  | 6 | -1.733           | 0.382  | 0.600  |
| 6 | 2.794    | -1.788 | -1.248 | 6 | 3.191            | -2.740 | 0.208  |
| 6 | 0.964    | -3.134 | -0.443 | 6 | -1.452           | -1.549 | -1.337 |
| 6 | -0.627   | 3.854  | 0.234  | 6 | -2.864           | -0.268 | 0.110  |
| 6 | -2.113   | 5.034  | -1.420 | 6 | -2.727           | -1.246 | -0.873 |
| 6 | 3.084    | 2.295  | 0.036  | 6 | -5.217           | -0.520 | 0.178  |
| 6 | 2.753    | 0.411  | 1.487  | 1 | 2.816            | 1.143  | 0.237  |
| 6 | 3.482    | -2.945 | -1.584 | 1 | 3.098            | -0.691 | -1.368 |
| 6 | 1.671    | -4.280 | -0.779 | 1 | 0.423            | -0.128 | 2.689  |
| 6 | 2.934    | -4.203 | -1.356 | 1 | 2.070            | 0.454  | 2.426  |
| 6 | 4.048    | 2.799  | 0.899  | 1 | 1.426            | 2.555  | 1.680  |
| 6 | 3.721    | 0.913  | 2.353  | 1 | -0.277           | 2.253  | 1.919  |
| 6 | 4.370    | 2.108  | 2.064  | 1 | 0.768            | 1.295  | -2.030 |
| 1 | -1.583   | -1.854 | -0.957 | 1 | 2.483            | 1.640  | -2.176 |
| 1 | -4.318   | 0.073  | -0.197 | 1 | 1.128            | -2.380 | -1.464 |
| 1 | -4.263   | -1.583 | -0.844 | 1 | 1.081            | -0.966 | -2.475 |
| 1 | -2.730   | -3.242 | 0.475  | 1 | 2.128            | -1.972 | 2.431  |
| 1 | -1.981   | -2.584 | 1.939  | 1 | 0.803            | -2.087 | 1.277  |
| 1 | -5.967   | -1.891 | 0.798  | 1 | 0.059            | 4.152  | 0.350  |
| 1 | -5.305   | -0.652 | 1.852  | 1 | -0.711           | 2.819  | -0.491 |
| 1 | -4.093   | -2.263 | 2.994  | 1 | 1.129            | 3.732  | -1.882 |
| 1 | -4.599   | -3.522 | 1.883  | 1 | 2.268            | 3.513  | -0.563 |
| 1 | -0.273   | -1.555 | 1.226  | 1 | -1.884           | 1.134  | 1.367  |
| 1 | -0.467   | 0.175  | 1.039  | 1 | 2.419            | -3.463 | -0.116 |
| 1 | -1.043   | 0.224  | -1.976 | 1 | 3.671            | -3.159 | 1.098  |
| 1 | -2.799   | 0.068  | -1.873 | 1 | 3.944            | -2.676 | -0.583 |
| 1 | 0.520    | 1.313  | -0.618 | 1 | -1.341           | -2.316 | -2.100 |
| 1 | 1.742    | 0.624  | -1.659 | 1 | -3.587           | -1.770 | -1.273 |
| 1 | -2.966   | 2.528  | -1.963 | 1 | -5.192           | -1.600 | 0.368  |
| 1 | -1.199   | 2.529  | -2.119 | 1 | -5.362           | -0.353 | -0.897 |
| 1 | -2.767   | 3.767  | 0.184  | 1 | -6.052           | -0.081 | 0.723  |
| 1 | 3.269    | -0.828 | -1.411 |   |                  |        |        |
| 1 | -0.026   | -3.237 | -0.014 |   |                  |        |        |
| 1 | 0.226    | 3.879  | -0.455 |   |                  |        |        |
| 1 | -0.508   | 2.982  | 0.882  |   |                  |        |        |
| 1 | -0.566   | 4.748  | 0.859  |   |                  |        |        |
| 1 | -1.309   | 5.102  | -2.161 |   |                  |        |        |
| 1 | -2.086   | 5.952  | -0.828 |   |                  |        |        |
| 1 | -3.062   | 5.018  | -1.963 |   |                  |        |        |
| 1 | 2.838    | 2.836  | -0.875 |   |                  |        |        |
| 1 | 2.257    | -0.528 | 1.712  |   |                  |        |        |
| 1 | 4.472    | -2.855 | -2.022 |   |                  |        |        |
| 1 | 1.218    | -5.248 | -0.590 |   |                  |        |        |
| 1 | 3.480    | -5.102 | -1.618 |   |                  |        |        |
| 1 | 4.552    | 3.731  | 0.662  |   |                  |        |        |
| 1 | 3.971    | 0.365  | 3.256  |   |                  |        |        |
| 1 | 5.125    | 2.497  | 2.739  |   |                  |        |        |
|   | Danazol  |        |        |   | Biperiden        |        |        |
| 8 | -5.062   | -1.185 | 0.629  | 8 | -1.712           | 0.358  | 1.862  |
| 8 | 5.684    | 0.255  | -0.613 | 7 | 2.426            | -1.276 | 0.170  |
| 7 | 6.168    | -1.050 | -0.435 | 6 | -1.961           | -0.482 | -0.430 |
| 6 | -2.101   | 0.756  | -0.233 | 6 | -2.589           | -1.861 | -0.047 |
| 6 | -2.748   | -0.444 | 0.472  | 6 | -4.358           | -0.706 | -0.790 |
| 6 | -0.684   | 1.043  | 0.238  | 6 | -3.206           | 0.337  | -0.859 |
| 6 | 0.181    | -0.216 | 0.027  | 6 | -3.609           | -1.985 | -1.189 |
| 6 | 1.669    | -0.034 | 0.456  | 6 | -1.041           | 0.175  | 0.609  |
| 6 | -1.911   | -1.685 | 0.188  | 6 | -3.525           | -1.661 | 1.125  |
| 6 | -4.165   | -0.403 | -0.165 | 6 | -4.587           | -0.983 | 0.678  |
| 6 | -0.463   | -1.474 | 0.631  | 6 | 0.136            | -0.743 | 0.970  |
| 6 | -3.153   | 1.865  | -0.137 | 6 | -0.492           | 1.523  | 0.130  |
| 6 | -0.075   | 2.224  | -0.505 | 6 | 1.021            | -1.155 | -0.203 |
| 6 | -4.503   | 1.118  | -0.148 | 6 | -0.377           | 1.878  | -1.216 |
| 6 | 2.227    | 1.274  | -0.119 | 6 | -0.008           | 2.419  | 1.089  |

|              |        |        |        |               |        |        |        |
|--------------|--------|--------|--------|---------------|--------|--------|--------|
| 6            | -2.901 | -0.232 | 1.982  | 6             | 3.038  | 0.045  | 0.315  |
| 6            | 1.348  | 2.485  | -0.037 | 6             | 3.161  | -2.061 | -0.816 |
| 6            | 2.458  | -1.285 | -0.026 | 6             | 4.478  | -0.065 | 0.786  |
| 6            | 1.821  | 0.080  | 1.985  | 6             | 4.607  | -2.259 | -0.394 |
| 6            | -4.173 | -0.905 | -1.539 | 6             | 5.293  | -0.917 | -0.177 |
| 6            | 3.508  | 1.390  | -0.526 | 6             | 0.203  | 3.087  | -1.592 |
| 6            | 3.915  | -1.021 | -0.163 | 6             | 0.573  | 3.625  | 0.718  |
| 6            | 4.353  | 0.239  | -0.447 | 6             | 0.683  | 3.964  | -0.628 |
| 6            | 5.101  | -1.780 | -0.176 | 1             | -1.346 | -0.669 | -1.319 |
| 6            | -4.240 | -1.309 | -2.673 | 1             | -1.858 | -2.666 | 0.052  |
| 1            | -2.023 | 0.472  | -1.297 | 1             | -5.240 | -0.439 | -1.374 |
| 1            | -0.710 | 1.292  | 1.311  | 1             | -3.091 | 0.739  | -1.870 |
| 1            | 0.208  | -0.368 | -1.067 | 1             | -3.399 | 1.198  | -0.208 |
| 1            | -1.935 | -1.892 | -0.889 | 1             | -4.229 | -2.881 | -1.110 |
| 1            | -2.336 | -2.564 | 0.685  | 1             | -3.155 | -1.936 | -2.185 |
| 1            | -0.420 | -1.423 | 1.724  | 1             | -3.297 | -1.928 | 2.149  |
| 1            | 0.121  | -2.357 | 0.353  | 1             | -5.406 | -0.582 | 1.265  |
| 1            | -3.069 | 2.587  | -0.953 | 1             | 0.733  | -0.221 | 1.724  |
| 1            | -3.029 | 2.431  | 0.794  | 1             | -0.265 | -1.627 | 1.476  |
| 1            | -0.685 | 3.123  | -0.362 | 1             | 0.911  | -0.441 | -1.045 |
| 1            | -0.084 | 2.011  | -1.583 | 1             | 0.695  | -2.126 | -0.593 |
| 1            | -5.085 | 1.314  | 0.756  | 1             | -2.571 | 0.759  | 1.684  |
| 1            | -5.131 | 1.392  | -0.998 | 1             | 2.446  | 0.636  | 1.021  |
| 1            | -3.498 | 0.649  | 2.223  | 1             | 3.000  | 0.592  | -0.652 |
| 1            | -3.397 | -1.093 | 2.434  | 1             | 3.133  | -1.569 | -1.813 |
| 1            | -1.931 | -0.109 | 2.468  | 1             | 2.656  | -3.026 | -0.928 |
| 1            | 1.306  | 2.810  | 1.014  | 1             | -0.739 | 1.210  | -1.991 |
| 1            | 1.809  | 3.311  | -0.586 | 1             | -0.100 | 2.155  | 2.138  |
| 1            | 2.057  | -1.606 | -0.999 | 1             | 4.908  | 0.936  | 0.885  |
| 1            | 2.269  | -2.114 | 0.663  | 1             | 4.492  | -0.519 | 1.784  |
| 1            | 1.264  | 0.926  | 2.395  | 1             | 4.626  | -2.838 | 0.537  |
| 1            | 1.474  | -0.825 | 2.488  | 1             | 5.133  | -2.851 | -1.149 |
| 1            | 2.874  | 0.218  | 2.248  | 1             | 5.376  | -0.394 | -1.140 |
| 1            | 3.911  | 2.342  | -0.858 | 1             | 6.316  | -1.055 | 0.189  |
| 1            | -5.855 | -1.344 | 0.109  | 1             | 0.280  | 3.341  | -2.645 |
| 1            | 5.243  | -2.840 | -0.007 | 1             | 0.941  | 4.303  | 1.481  |
| 1            | -4.289 | -1.673 | -3.670 | 1             | 1.136  | 4.906  | -0.921 |
| Atomoxetine  |        |        |        | Chlophedianol |        |        |        |
| 8            | 0.662  | 1.126  | 0.220  | 17            | 0.612  | 0.577  | 2.207  |
| 7            | -4.045 | 1.954  | 0.059  | 8             | 0.029  | -0.397 | -2.221 |
| 6            | -0.521 | 0.556  | -0.348 | 7             | -3.326 | -1.751 | -0.138 |
| 6            | -1.660 | 1.429  | 0.161  | 6             | 0.176  | -0.340 | -0.786 |
| 6            | -0.686 | -0.895 | 0.036  | 6             | -0.903 | -1.236 | -0.156 |
| 6            | -3.016 | 1.033  | -0.391 | 6             | -2.315 | -0.740 | -0.420 |
| 6            | 1.883  | 0.683  | -0.206 | 6             | -0.046 | 1.125  | -0.413 |
| 6            | -0.348 | -1.329 | 1.318  | 6             | 1.601  | -0.782 | -0.459 |
| 6            | -1.227 | -1.809 | -0.867 | 6             | 0.109  | 1.616  | 0.889  |
| 6            | 2.976  | 1.201  | 0.512  | 6             | -0.452 | 2.043  | -1.386 |
| 6            | -0.548 | -2.654 | 1.688  | 6             | 2.660  | 0.031  | -0.875 |
| 6            | -1.435 | -3.133 | -0.498 | 6             | 1.896  | -1.987 | 0.177  |
| 6            | 2.079  | -0.198 | -1.267 | 6             | -3.363 | -2.100 | 1.270  |
| 6            | -1.096 | -3.558 | 0.782  | 6             | -4.629 | -1.290 | -0.575 |
| 6            | -5.355 | 1.624  | -0.468 | 6             | -0.124 | 2.949  | 1.207  |
| 6            | 4.254  | 0.819  | 0.122  | 6             | -0.692 | 3.377  | -1.083 |
| 6            | 2.738  | 2.133  | 1.657  | 6             | 3.977  | -0.343 | -0.649 |
| 6            | 3.373  | -0.561 | -1.632 | 6             | 3.217  | -2.366 | 0.403  |
| 6            | 4.465  | -0.055 | -0.943 | 6             | -0.528 | 3.835  | 0.218  |
| 1            | -0.470 | 0.634  | -1.446 | 6             | 4.261  | -1.545 | -0.005 |
| 1            | -1.434 | 2.467  | -0.112 | 1             | -0.720 | -1.324 | 0.918  |
| 1            | -1.679 | 1.390  | 1.255  | 1             | -0.803 | -2.244 | -0.579 |
| 1            | -3.288 | 0.029  | -0.038 | 1             | -2.404 | -0.461 | -1.476 |
| 1            | -2.965 | 0.957  | -1.497 | 1             | -2.505 | 0.183  | 0.166  |
| 1            | 0.088  | -0.622 | 2.019  | 1             | 0.332  | -1.269 | -2.493 |
| 1            | -1.482 | -1.477 | -1.872 | 1             | -0.575 | 1.683  | -2.400 |
| 1            | -3.794 | 2.895  | -0.228 | 1             | 2.439  | 0.968  | -1.379 |
| 1            | -0.275 | -2.983 | 2.685  | 1             | 1.097  | -2.634 | 0.521  |
| 1            | -1.855 | -3.835 | -1.212 | 1             | -4.157 | -2.829 | 1.447  |
| 1            | 1.235  | -0.614 | -1.805 | 1             | -3.552 | -1.224 | 1.922  |
| 1            | -1.250 | -4.592 | 1.071  | 1             | -2.421 | -2.554 | 1.583  |
| 1            | -6.085 | 2.373  | -0.152 | 1             | -4.606 | -1.064 | -1.644 |
| 1            | -5.677 | 0.660  | -0.064 | 1             | -4.966 | -0.380 | -0.043 |
| 1            | -5.395 | 1.548  | -1.569 | 1             | -5.376 | -2.071 | -0.408 |
| 1            | 5.103  | 1.216  | 0.672  | 1             | 0.014  | 3.279  | 2.230  |
| 1            | 2.213  | 3.038  | 1.337  | 1             | -1.005 | 4.057  | -1.868 |
| 1            | 2.106  | 1.673  | 2.422  | 1             | 4.785  | 0.305  | -0.972 |
| 1            | 3.679  | 2.430  | 2.123  | 1             | 3.427  | -3.304 | 0.907  |
| 1            | 3.517  | -1.249 | -2.459 | 1             | -0.710 | 4.874  | 0.469  |
| 1            | 5.473  | -0.339 | -1.224 | 1             | 5.289  | -1.838 | 0.177  |
| Clomipramine |        |        |        | Azatadine     |        |        |        |
| 17           | 3.650  | -2.739 | -0.961 | 7             | -3.935 | -0.367 | 0.086  |
| 7            | -0.651 | -0.001 | -0.615 | 7             | 0.824  | 2.053  | -1.564 |
| 7            | 1.587  | 3.706  | -0.108 | 6             | -1.171 | -0.199 | -0.730 |
| 6            | -0.152 | 0.749  | -1.769 | 6             | -2.123 | 0.943  | -0.942 |
| 6            | 0.229  | -0.878 | 0.061  | 6             | -1.884 | -1.519 | -0.653 |

|   |                 |        |        |    |             |        |        |
|---|-----------------|--------|--------|----|-------------|--------|--------|
| 6 | -2.055          | -0.228 | -0.575 | 6  | -3.241      | 0.912  | 0.094  |
| 6 | -1.074          | -0.859 | 2.323  | 6  | -3.010      | -1.451 | 0.375  |
| 6 | -1.962          | 0.290  | 1.860  | 6  | 0.148       | -0.033 | -0.507 |
| 6 | 0.053           | -1.276 | 1.406  | 6  | 1.098       | -1.162 | -0.320 |
| 6 | -2.740          | -0.070 | 0.637  | 6  | 0.762       | 1.322  | -0.444 |
| 6 | 1.007           | 1.674  | -1.419 | 6  | 1.989       | -1.276 | 0.766  |
| 6 | 0.700           | 2.556  | -0.218 | 6  | 2.088       | -0.317 | 1.933  |
| 6 | 1.348           | -1.357 | -0.642 | 6  | 1.124       | 0.866  | 1.987  |
| 6 | -2.761          | -0.543 | -1.739 | 6  | 1.250       | 1.765  | 0.796  |
| 6 | 1.008           | -2.129 | 1.964  | 6  | -5.037      | -0.364 | 1.023  |
| 6 | -4.119          | -0.268 | 0.660  | 6  | 1.146       | -2.137 | -1.331 |
| 6 | 2.274           | -2.187 | -0.036 | 6  | 2.861       | -2.371 | 0.800  |
| 6 | -4.139          | -0.718 | -1.700 | 6  | 1.836       | 3.024  | 0.848  |
| 6 | 2.122           | -2.592 | 1.281  | 6  | 2.018       | -3.212 | -1.278 |
| 6 | -4.822          | -0.587 | -0.497 | 6  | 2.885       | -3.333 | -0.197 |
| 6 | 2.967           | 3.305  | 0.097  | 6  | 1.917       | 3.787  | -0.311 |
| 6 | 1.150           | 4.570  | 0.970  | 6  | 1.394       | 3.258  | -1.484 |
| 1 | 0.119           | 0.099  | -2.616 | 1  | -1.616      | 1.908  | -0.915 |
| 1 | -0.995          | 1.355  | -2.113 | 1  | -2.574      | 0.848  | -1.939 |
| 1 | -1.714          | -1.731 | 2.515  | 1  | -2.323      | -1.758 | -1.631 |
| 1 | -0.634          | -0.606 | 3.295  | 1  | -1.206      | -2.333 | -0.393 |
| 1 | -2.647          | 0.560  | 2.669  | 1  | -2.814      | 1.123  | 1.099  |
| 1 | -1.343          | 1.172  | 1.656  | 1  | -3.971      | 1.702  | -0.110 |
| 1 | 1.207           | 2.309  | -2.290 | 1  | -3.571      | -2.392 | 0.382  |
| 1 | 1.919           | 1.097  | -1.241 | 1  | -2.568      | -1.334 | 1.388  |
| 1 | 0.729           | 1.944  | 0.708  | 1  | 1.982       | -0.897 | 2.858  |
| 1 | -0.327          | 2.935  | -0.299 | 1  | 3.115       | 0.073  | 1.960  |
| 1 | 1.488           | -1.097 | -1.682 | 1  | 1.318       | 1.432  | 2.904  |
| 1 | -2.225          | -0.661 | -2.675 | 1  | 0.094       | 0.496  | 2.058  |
| 1 | 0.875           | -2.427 | 3.001  | 1  | -4.711      | -0.208 | 2.070  |
| 1 | -4.649          | -0.143 | 1.601  | 1  | -5.570      | -1.318 | 0.977  |
| 1 | -4.675          | -0.967 | -2.610 | 1  | -5.742      | 0.432  | 0.769  |
| 1 | 2.851           | -3.236 | 1.754  | 1  | 0.483       | -2.021 | -2.183 |
| 1 | -5.898          | -0.725 | -0.460 | 1  | 3.540       | -2.461 | 1.645  |
| 1 | 3.340           | 2.745  | -0.764 | 1  | 2.217       | 3.407  | 1.792  |
| 1 | 3.099           | 2.675  | 0.998  | 1  | 2.028       | -3.944 | -2.079 |
| 1 | 3.593           | 4.193  | 0.211  | 1  | 3.578       | -4.166 | -0.134 |
| 1 | 1.790           | 5.455  | 1.022  | 1  | 2.368       | 4.774  | -0.306 |
| 1 | 1.178           | 4.072  | 1.959  | 1  | 1.430       | 3.828  | -2.410 |
| 1 | 0.124           | 4.901  | 0.791  |    |             |        |        |
|   | Bethanidine     |        |        |    | Dapsone     |        |        |
| 7 | 0.939           | -0.950 | 0.603  | 16 | 0.000       | 1.631  | 0.000  |
| 7 | 2.879           | -0.546 | -0.621 | 8  | 0.000       | 2.337  | -1.279 |
| 7 | 1.858           | 1.186  | 0.630  | 8  | 0.000       | 2.336  | 1.279  |
| 6 | -0.194          | -0.519 | 1.413  | 7  | -4.643      | -2.096 | 0.000  |
| 6 | -1.419          | -0.167 | 0.610  | 7  | 4.643       | -2.097 | 0.000  |
| 6 | -1.396          | 0.906  | -0.288 | 6  | -1.406      | 0.539  | 0.000  |
| 6 | -2.591          | -0.914 | 0.733  | 6  | 1.406       | 0.539  | 0.000  |
| 6 | 1.887           | -0.025 | 0.194  | 6  | -1.949      | 0.108  | 1.208  |
| 6 | -2.520          | 1.216  | -1.043 | 6  | 1.950       | 0.109  | -1.208 |
| 6 | -3.719          | -0.603 | -0.021 | 6  | -1.950      | 0.109  | -1.208 |
| 6 | -3.686          | 0.463  | -0.912 | 6  | 1.950       | 0.109  | 1.208  |
| 6 | 2.818           | -1.860 | -1.217 | 6  | -3.035      | -0.750 | 1.209  |
| 6 | 2.974           | 2.026  | 0.281  | 6  | 3.035       | -0.749 | -1.209 |
| 1 | 0.155           | 0.344  | 1.985  | 6  | -3.035      | -0.749 | -1.209 |
| 1 | -0.436          | -1.319 | 2.121  | 6  | 3.035       | -0.749 | 1.209  |
| 1 | 0.707           | -1.652 | -0.085 | 6  | -3.594      | -1.192 | 0.000  |
| 1 | -0.487          | 1.494  | -0.371 | 6  | 3.594       | -1.192 | 0.000  |
| 1 | -2.618          | -1.748 | 1.430  | 1  | -1.529      | 0.471  | 2.141  |
| 1 | -2.493          | 2.055  | -1.732 | 1  | 1.530       | 0.472  | -2.141 |
| 1 | -4.623          | -1.194 | 0.088  | 1  | -1.530      | 0.473  | -2.141 |
| 1 | -4.563          | 0.709  | -1.502 | 1  | 1.530       | 0.472  | 2.141  |
| 1 | 3.379           | 0.153  | -1.147 | 1  | -3.466      | -1.081 | 2.149  |
| 1 | 1.988           | -1.991 | -1.927 | 1  | 3.466       | -1.080 | -2.149 |
| 1 | 2.732           | -2.624 | -0.441 | 1  | -3.467      | -1.079 | -2.149 |
| 1 | 3.746           | -2.048 | -1.757 | 1  | 3.467       | -1.080 | 2.149  |
| 1 | 3.946           | 1.607  | 0.586  | 1  | -5.204      | -2.119 | 0.838  |
| 1 | 2.869           | 2.996  | 0.771  | 1  | -5.205      | -2.118 | -0.838 |
| 1 | 3.042           | 2.234  | -0.803 | 1  | 5.205       | -2.118 | -0.838 |
|   |                 |        |        | 1  | 5.205       | -2.118 | 0.837  |
|   | Doxercalciferol |        |        |    | Calcifediol |        |        |
| 8 | -8.272          | -0.062 | 1.145  | 8  | -7.984      | -2.360 | 0.140  |
| 8 | -4.753          | -2.360 | 1.577  | 8  | 6.940       | -0.901 | 2.077  |
| 6 | 0.841           | 1.622  | 0.001  | 6  | -0.677      | 1.448  | -0.278 |
| 6 | 2.200           | 1.028  | -0.439 | 6  | -1.976      | 0.621  | -0.458 |
| 6 | -0.083          | 1.006  | -1.091 | 6  | 0.250       | 0.367  | 0.342  |
| 6 | 1.851           | -0.415 | -0.888 | 6  | -1.477      | -0.767 | -0.918 |
| 6 | 0.332           | -0.456 | -1.142 | 6  | -0.001      | -0.882 | -0.491 |
| 6 | 0.703           | 3.145  | -0.087 | 6  | -0.771      | 2.650  | 0.691  |
| 6 | 3.372           | 1.043  | 0.557  | 6  | -3.064      | 1.190  | -1.376 |
| 6 | -1.516          | 1.397  | -0.917 | 6  | 1.647       | 0.869  | 0.523  |
| 6 | 0.457           | 1.118  | 1.394  | 6  | -0.131      | 1.901  | -1.635 |
| 6 | -0.752          | 3.591  | 0.055  | 6  | 0.376       | 2.690  | 1.710  |
| 6 | -1.688          | 2.890  | -0.937 | 6  | 1.713       | 2.258  | 1.116  |

|   |             |        |        |   |             |        |        |
|---|-------------|--------|--------|---|-------------|--------|--------|
| 6 | 3.740       | 2.441  | 1.052  | 6 | -4.242      | 0.217  | -1.538 |
| 6 | 4.572       | 0.399  | -0.075 | 6 | -3.549      | 2.569  | -0.939 |
| 6 | -2.510      | 0.497  | -0.762 | 6 | 2.734       | 0.161  | 0.148  |
| 6 | 5.159       | -0.723 | 0.335  | 6 | -4.983      | -0.147 | -0.256 |
| 6 | -3.903      | 0.786  | -0.532 | 6 | -6.160      | -1.072 | -0.527 |
| 6 | 6.341       | -1.383 | -0.310 | 6 | 4.099       | 0.600  | 0.290  |
| 6 | -4.922      | -0.104 | -0.472 | 6 | -6.955      | -1.521 | 0.697  |
| 6 | 7.535       | -1.472 | 0.666  | 6 | 5.209       | -0.019 | -0.179 |
| 6 | -6.318      | 0.338  | -0.123 | 6 | 6.585       | 0.513  | 0.128  |
| 6 | 5.924       | -2.754 | -0.847 | 6 | -7.602      | -0.344 | 1.419  |
| 6 | -4.780      | -1.552 | -0.702 | 6 | -6.104      | -2.342 | 1.659  |
| 6 | -6.928      | -0.510 | 0.982  | 6 | 5.203       | -1.274 | -0.959 |
| 6 | -5.451      | -2.436 | 0.326  | 6 | 7.445       | -0.566 | 0.786  |
| 6 | -6.873      | -1.986 | 0.609  | 6 | 6.138       | -2.340 | -0.442 |
| 6 | 7.955       | -0.086 | 1.142  | 6 | 7.526       | -1.792 | -0.119 |
| 6 | 8.725       | -2.200 | 0.054  | 6 | 4.455       | -1.448 | -2.054 |
| 6 | -4.131      | -2.095 | -1.739 | 1 | -2.405      | 0.519  | 0.552  |
| 1 | 2.518       | 1.603  | -1.325 | 1 | -0.167      | 0.181  | 1.348  |
| 1 | 0.258       | 1.476  | -2.031 | 1 | -2.094      | -1.569 | -0.501 |
| 1 | 2.143       | -1.130 | -0.110 | 1 | -1.570      | -0.856 | -2.007 |
| 1 | 2.427       | -0.698 | -1.773 | 1 | 0.214       | -1.801 | 0.062  |
| 1 | 0.067       | -0.932 | -2.090 | 1 | 0.657       | -0.891 | -1.367 |
| 1 | -0.176      | -1.025 | -0.357 | 1 | -1.724      | 2.631  | 1.230  |
| 1 | 1.094       | 3.474  | -1.061 | 1 | -0.774      | 3.583  | 0.115  |
| 1 | 1.310       | 3.647  | 0.672  | 1 | -2.618      | 1.295  | -2.376 |
| 1 | 3.086       | 0.429  | 1.424  | 1 | -0.063      | 1.077  | -2.351 |
| 1 | 0.651       | 0.047  | 1.508  | 1 | 0.870       | 2.333  | -1.540 |
| 1 | 1.032       | 1.634  | 2.169  | 1 | -0.774      | 2.668  | -2.077 |
| 1 | -0.604      | 1.274  | 1.607  | 1 | 0.140       | 2.033  | 2.556  |
| 1 | -0.823      | 4.676  | -0.080 | 1 | 0.461       | 3.695  | 2.135  |
| 1 | -1.098      | 3.393  | 1.076  | 1 | 2.016       | 2.975  | 0.338  |
| 1 | -1.444      | 3.245  | -1.950 | 1 | 2.498       | 2.316  | 1.879  |
| 1 | -2.723      | 3.187  | -0.755 | 1 | -3.892      | -0.706 | -2.016 |
| 1 | 3.911       | 3.125  | 0.213  | 1 | -4.958      | 0.657  | -2.245 |
| 1 | 4.657       | 2.413  | 1.646  | 1 | -2.760      | 3.321  | -1.006 |
| 1 | 2.957       | 2.875  | 1.678  | 1 | -4.379      | 2.908  | -1.565 |
| 1 | 4.981       | 0.918  | -0.947 | 1 | -3.902      | 2.565  | 0.098  |
| 1 | -2.242      | -0.557 | -0.800 | 1 | 2.584       | -0.820 | -0.293 |
| 1 | 4.748       | -1.241 | 1.207  | 1 | -4.289      | -0.627 | 0.446  |
| 1 | -4.166      | 1.825  | -0.344 | 1 | -5.332      | 0.766  | 0.243  |
| 1 | 6.657       | -0.758 | -1.160 | 1 | -6.861      | -0.587 | -1.218 |
| 1 | 7.194       | -2.048 | 1.541  | 1 | -5.809      | -1.975 | -1.043 |
| 1 | -6.332      | 1.393  | 0.164  | 1 | 4.263       | 1.522  | 0.849  |
| 1 | -6.974      | 0.239  | -1.001 | 1 | 6.521       | 1.391  | 0.777  |
| 1 | 6.709       | -3.217 | -1.449 | 1 | 7.080       | 0.827  | -0.801 |
| 1 | 5.031       | -2.671 | -1.472 | 1 | -8.247      | -0.697 | 2.230  |
| 1 | 5.686       | -3.439 | -0.025 | 1 | -6.855      | 0.319  | 1.865  |
| 1 | -6.360      | -0.352 | 1.910  | 1 | -8.215      | 0.241  | 0.729  |
| 1 | -5.449      | -3.474 | -0.039 | 1 | -5.311      | -1.743 | 2.115  |
| 1 | -7.491      | -2.148 | -0.282 | 1 | -6.718      | -2.739 | 2.474  |
| 1 | -7.290      | -2.603 | 1.414  | 1 | -5.645      | -3.187 | 1.141  |
| 1 | 8.790       | -0.145 | 1.846  | 1 | 8.452       | -0.176 | 0.967  |
| 1 | 8.283       | 0.529  | 0.296  | 1 | 5.710       | -2.758 | 0.481  |
| 1 | 7.136       | 0.446  | 1.632  | 1 | 6.198       | -3.168 | -1.153 |
| 1 | 9.038       | -1.718 | -0.880 | 1 | -8.528      | -2.677 | 0.867  |
| 1 | 9.584       | -2.183 | 0.731  | 1 | 8.134       | -2.562 | 0.364  |
| 1 | 8.510       | -3.247 | -0.171 | 1 | 8.041       | -1.510 | -1.047 |
| 1 | -4.076      | -3.173 | -1.861 | 1 | 4.490       | -2.375 | -2.618 |
| 1 | -3.659      | -1.486 | -2.503 | 1 | 3.800       | -0.667 | -2.425 |
| 1 | -8.651      | -0.533 | 1.892  | 1 | 5.976       | -0.895 | 2.022  |
| 1 | -3.815      | -2.476 | 1.396  |   |             |        |        |
|   | Desogestrel |        |        |   | Benztropine |        |        |
| 8 | -4.460      | 0.476  | 0.222  | 8 | 0.221       | -0.978 | -0.265 |
| 6 | -1.966      | 0.276  | -0.141 | 7 | -3.819      | -1.384 | 0.334  |
| 6 | -1.117      | -1.011 | -0.115 | 6 | -3.221      | -0.314 | 1.153  |
| 6 | 0.287       | -0.853 | -0.679 | 6 | -3.424      | -0.959 | -1.022 |
| 6 | 1.011       | 0.258  | 0.123  | 6 | -3.560      | 1.002  | 0.409  |
| 6 | -3.282      | -0.285 | 0.501  | 6 | -3.704      | 0.563  | -1.063 |
| 6 | -2.047      | -2.076 | -0.695 | 6 | -1.714      | -0.559 | 1.211  |
| 6 | -1.214      | 1.356  | 0.645  | 6 | -1.940      | -1.273 | -1.189 |
| 6 | -3.444      | -1.662 | -0.197 | 6 | -1.114      | -0.479 | -0.191 |
| 6 | 2.498       | 0.439  | -0.245 | 6 | -5.260      | -1.461 | 0.493  |
| 6 | 1.069       | -2.158 | -0.640 | 6 | 1.176       | -0.271 | 0.512  |
| 6 | 0.171       | 1.521  | 0.070  | 6 | 2.525       | -0.920 | 0.299  |
| 6 | -2.263      | 0.729  | -1.590 | 6 | 1.207       | 1.205  | 0.161  |
| 6 | 2.483       | -1.951 | -1.164 | 6 | 3.592       | -0.545 | 1.118  |
| 6 | 3.209       | -0.893 | -0.389 | 6 | 0.963       | 2.177  | 1.128  |
| 6 | 3.213       | 1.324  | 0.781  | 6 | 2.740       | -1.858 | -0.708 |
| 6 | -2.788      | 2.145  | -1.777 | 6 | 1.455       | 1.604  | -1.154 |
| 6 | -3.151      | -0.443 | 1.950  | 6 | 4.852       | -1.099 | 0.937  |
| 6 | 4.722       | 1.300  | 0.605  | 6 | 0.968       | 3.529  | 0.793  |
| 6 | 4.421       | -1.123 | 0.130  | 6 | 4.005       | -2.412 | -0.890 |
| 6 | 0.555       | 2.665  | -0.499 | 6 | 1.454       | 2.949  | -1.493 |
| 6 | 5.255       | -0.106 | 0.840  | 6 | 5.063       | -2.036 | -0.072 |

|   |             |        |        |   |                |        |        |
|---|-------------|--------|--------|---|----------------|--------|--------|
| 6 | -3.079      | -0.546 | 3.149  | 6 | 1.211          | 3.917  | -0.519 |
| 1 | -0.984      | -1.256 | 0.953  | 1 | -3.645         | -0.346 | 2.161  |
| 1 | 0.233       | -0.531 | -1.731 | 1 | -4.009         | -1.513 | -1.763 |
| 1 | 0.991       | -0.088 | 1.173  | 1 | -2.786         | 1.762  | 0.551  |
| 1 | -1.773      | -3.084 | -0.375 | 1 | -4.493         | 1.430  | 0.786  |
| 1 | -2.002      | -2.072 | -1.790 | 1 | -4.711         | 0.762  | -1.438 |
| 1 | -1.137      | 1.033  | 1.692  | 1 | -3.013         | 1.087  | -1.730 |
| 1 | -1.749      | 2.312  | 0.644  | 1 | -1.246         | 0.180  | 1.870  |
| 1 | 2.534       | 0.930  | -1.234 | 1 | -1.525         | -1.553 | 1.631  |
| 1 | -4.156      | -1.529 | -1.015 | 1 | -1.777         | -2.342 | -1.018 |
| 1 | -3.885      | -2.388 | 0.487  | 1 | -1.603         | -1.044 | -2.206 |
| 1 | 0.551       | -2.923 | -1.229 | 1 | -1.105         | 0.578  | -0.505 |
| 1 | 1.105       | -2.531 | 0.394  | 1 | -5.498         | -1.744 | 1.522  |
| 1 | -2.976      | 0.031  | -2.041 | 1 | -5.658         | -2.238 | -0.165 |
| 1 | -1.344      | 0.630  | -2.177 | 1 | -5.801         | -0.524 | 0.271  |
| 1 | 2.415       | -1.644 | -2.219 | 1 | 0.922          | -0.356 | 1.582  |
| 1 | 3.055       | -2.884 | -1.150 | 1 | 3.431          | 0.192  | 1.901  |
| 1 | 2.966       | 0.951  | 1.786  |   |                |        |        |
| 1 | 2.832       | 2.346  | 0.741  | 1 | 0.765          | 1.869  | 2.153  |
| 1 | -3.698      | 2.327  | -1.203 | 1 | 1.909          | -2.155 | -1.337 |
| 1 | -2.047      | 2.896  | -1.495 | 1 | 1.643          | 0.844  | -1.909 |
| 1 | -3.030      | 2.319  | -2.829 | 1 | 5.672          | -0.800 | 1.583  |
| 1 | -4.488      | 1.214  | 0.840  | 1 | 0.778          | 4.277  | 1.556  |
| 1 | 5.203       | 2.015  | 1.279  | 1 | 4.162          | -3.144 | -1.676 |
| 1 | 4.974       | 1.618  | -0.415 | 1 | 1.647          | 3.250  | -2.518 |
| 1 | 4.852       | -2.116 | 0.001  | 1 | 6.047          | -2.470 | -0.215 |
| 1 | 1.532       | 2.802  | -0.950 | 1 | 1.213          | 4.969  | -0.784 |
| 1 | -0.109      | 3.524  | -0.528 |   |                |        |        |
| 1 | 5.278       | -0.325 | 1.919  |   |                |        |        |
| 1 | 6.298       | -0.188 | 0.512  |   |                |        |        |
| 1 | -3.017      | -0.646 | 4.206  |   |                |        |        |
|   | Desipramine |        |        |   | Ergocalciferol |        |        |
| 7 | -0.004      | 0.062  | -0.033 | 8 | -7.317         | -0.215 | -1.444 |
| 7 | 4.265       | 0.726  | 0.426  | 6 | 0.646          | 1.574  | 0.093  |
| 6 | -2.096      | 0.616  | 1.757  | 6 | 1.945          | 0.917  | -0.435 |
| 6 | -2.721      | -0.674 | 1.241  | 6 | -0.408         | 0.818  | -0.760 |
| 6 | -0.765      | 1.243  | -0.250 | 6 | 1.569          | -0.570 | -0.627 |
| 6 | -0.616      | -1.207 | -0.211 | 6 | 0.033          | -0.639 | -0.714 |
| 6 | 1.434       | 0.180  | -0.258 | 6 | 0.508          | 3.095  | -0.157 |
| 6 | -1.800      | 1.561  | 0.639  | 6 | 3.226          | 1.089  | 0.396  |
| 6 | -1.865      | -1.551 | 0.356  | 6 | -1.806         | 1.184  | -0.372 |
| 6 | 2.242       | -0.634 | 0.746  | 6 | 0.450          | 1.261  | 1.580  |
| 6 | -0.458      | 2.116  | -1.297 | 6 | -0.848         | 3.481  | -0.762 |
| 6 | 0.056       | -2.180 | -0.974 | 6 | -2.006         | 2.672  | -0.185 |
| 6 | -2.528      | 2.732  | 0.438  | 6 | 3.604          | 2.552  | 0.621  |
| 6 | -2.372      | -2.830 | 0.107  | 6 | 4.360          | 0.363  | -0.265 |
| 6 | 3.726       | -0.627 | 0.436  | 6 | -2.774         | 0.266  | -0.168 |
| 6 | -1.183      | 3.289  | -1.472 | 6 | 5.015          | -0.681 | 0.239  |
| 6 | -0.469      | -3.443 | -1.190 | 6 | -4.131         | 0.563  | 0.212  |
| 6 | -2.227      | 3.598  | -0.607 | 6 | 6.125          | -1.432 | -0.432 |
| 6 | -1.704      | -3.779 | -0.651 | 6 | -5.102         | -0.324 | 0.540  |
| 6 | 5.691       | 0.755  | 0.161  | 6 | 7.426          | -1.369 | 0.398  |
| 1 | -1.170      | 0.383  | 2.297  | 6 | -6.508         | 0.133  | 0.825  |
| 1 | -2.778      | 1.085  | 2.472  | 6 | 5.673          | -2.868 | -0.702 |
| 1 | -3.642      | -0.417 | 0.700  | 6 | -4.917         | -1.788 | 0.587  |
| 1 | -3.049      | -1.284 | 2.092  | 6 | -7.504         | -0.591 | -0.081 |
| 1 | 1.733       | -0.084 | -1.287 | 6 | -5.952         | -2.578 | -0.176 |
| 1 | 1.689       | 1.235  | -0.147 | 6 | -7.375         | -2.101 | 0.106  |
| 1 | 1.886       | -1.668 | 0.773  | 6 | 7.876          | 0.073  | 0.601  |
| 1 | 2.062       | -0.230 | 1.751  | 6 | 8.548          | -2.187 | -0.229 |
| 1 | 0.348       | 1.870  | -1.981 | 6 | -3.932         | -2.377 | 1.275  |
| 1 | 1.011       | -1.935 | -1.422 | 1 | 2.134          | 1.361  | -1.426 |
| 1 | 3.897       | -1.056 | -0.562 | 1 | -0.247         | 1.177  | -1.792 |
| 1 | 4.259       | -1.290 | 1.143  | 1 | 1.943          | -1.161 | 0.218  |
| 1 | -3.329      | 2.975  | 1.132  | 1 | 2.058          | -0.988 | -1.511 |
| 1 | -3.332      | -3.084 | 0.551  | 1 | -0.322         | -1.207 | -1.578 |
| 1 | -0.937      | 3.955  | -2.293 | 1 | -0.386         | -1.132 | 0.170  |
| 1 | 0.087       | -4.158 | -1.789 | 1 | 1.307          | 3.446  | -0.820 |
| 1 | -2.798      | 4.511  | -0.741 | 1 | 0.647          | 3.634  | 0.788  |
| 1 | -2.134      | -4.762 | -0.807 | 1 | 3.057          | 0.616  | 1.374  |
| 1 | 4.084       | 1.154  | 1.330  | 1 | 1.184          | 1.794  | 2.190  |
| 1 | 6.289       | 0.125  | 0.843  | 1 | -0.542         | 1.565  | 1.926  |
| 1 | 6.064       | 1.779  | 0.226  | 1 | 0.556          | 0.194  | 1.796  |
| 1 | 5.878       | 0.400  | -0.857 | 1 | -0.824         | 3.332  | -1.848 |
|   |             |        |        | 1 | -1.028         | 4.550  | -0.617 |
|   |             |        |        | 1 | -2.951         | 2.994  | -0.637 |
|   |             |        |        | 1 | -2.109         | 2.896  | 0.887  |
|   |             |        |        | 1 | 3.745          | 3.072  | -0.333 |
|   |             |        |        | 1 | 4.541          | 2.630  | 1.178  |
|   |             |        |        | 1 | 2.837          | 3.094  | 1.180  |
|   |             |        |        | 1 | 4.654          | 0.741  | -1.249 |
|   |             |        |        | 1 | -2.525         | -0.783 | -0.302 |
|   |             |        |        | 1 | 4.718          | -1.059 | 1.222  |
|   |             |        |        | 1 | -4.418         | 1.615  | 0.222  |





|   |                 |        |        |   |                |        |        |
|---|-----------------|--------|--------|---|----------------|--------|--------|
| 1 | -6.861          | -3.130 | 2.523  |   |                |        |        |
| 1 | -5.776          | -3.512 | 1.184  |   |                |        |        |
| 1 | 8.152           | 0.061  | 0.953  |   |                |        |        |
| 1 | 5.505           | -2.628 | 0.526  |   |                |        |        |
| 1 | 6.009           | -3.058 | -1.098 |   |                |        |        |
| 1 | 7.920           | -2.349 | 0.406  |   |                |        |        |
| 1 | 7.792           | -1.333 | -1.029 |   |                |        |        |
| 1 | 4.279           | -2.358 | -2.585 |   |                |        |        |
| 1 | 3.526           | -0.672 | -2.429 |   |                |        |        |
| 1 | 5.704           | -0.724 | 2.026  |   |                |        |        |
|   | Cyclobenzaprine |        |        |   | Cyproheptadine |        |        |
| 7 | -2.617          | -1.993 | 0.549  | 7 | -3.896         | 0.000  | 0.094  |
| 6 | 0.305           | -0.086 | -0.733 | 6 | -1.129         | 0.000  | -0.731 |
| 6 | 1.694           | -0.514 | -0.453 | 6 | -1.967         | 1.245  | -0.794 |
| 6 | -0.053          | 1.330  | -0.485 | 6 | -1.967         | -1.245 | -0.794 |
| 6 | -2.019          | -0.763 | -1.527 | 6 | -3.080         | 1.195  | 0.247  |
| 6 | -0.571          | -0.975 | -1.235 | 6 | -3.080         | -1.195 | 0.247  |
| 6 | -2.892          | -1.831 | -0.871 | 6 | 0.203          | 0.000  | -0.517 |
| 6 | 2.271           | -0.374 | 0.829  | 6 | 0.990          | -1.250 | -0.391 |
| 6 | 0.077           | 1.920  | 0.793  | 6 | 0.990          | 1.250  | -0.391 |
| 6 | 1.611           | 0.277  | 1.946  | 6 | -4.995         | 0.000  | 1.037  |
| 6 | 0.673           | 1.248  | 1.933  | 6 | 1.630          | -1.574 | 0.825  |
| 6 | 2.428           | -1.149 | -1.460 | 6 | 1.630          | 1.574  | 0.825  |
| 6 | -0.584          | 2.094  | -1.530 | 6 | 1.071          | -2.145 | -1.462 |
| 6 | 3.545           | -0.923 | 1.054  | 6 | 1.071          | 2.145  | -1.462 |
| 6 | -0.403          | 3.227  | 0.980  | 6 | 1.670          | -0.675 | 1.967  |
| 6 | 3.698           | -1.660 | -1.223 | 6 | 1.670          | 0.675  | 1.967  |
| 6 | -1.020          | 3.397  | -1.332 | 6 | 2.261          | -2.824 | 0.939  |
| 6 | 4.258           | -1.551 | 0.046  | 6 | 2.261          | 2.824  | 0.939  |
| 6 | -0.940          | 3.964  | -0.063 | 6 | 1.731          | -3.360 | -1.341 |
| 6 | -3.401          | -3.080 | 1.096  | 6 | 1.731          | 3.361  | -1.341 |
| 6 | -2.830          | -0.773 | 1.302  | 6 | 2.320          | -3.707 | -0.126 |
| 1 | -2.203          | -0.806 | -2.609 | 6 | 2.320          | 3.707  | -0.126 |
| 1 | -2.338          | 0.236  | -1.215 | 1 | -1.370         | 2.146  | -0.644 |
| 1 | -0.211          | -1.995 | -1.377 | 1 | -2.429         | 1.323  | -1.788 |
| 1 | -3.960          | -1.591 | -1.055 | 1 | -2.429         | -1.323 | -1.788 |
| 1 | -2.705          | -2.801 | -1.348 | 1 | -1.370         | -2.146 | -0.644 |
| 1 | 2.002           | -0.002 | 2.923  | 1 | -2.630         | 1.241  | 1.261  |
| 1 | 0.394           | 1.664  | 2.900  | 1 | -3.730         | 2.071  | 0.148  |
| 1 | 1.979           | -1.242 | -2.444 | 1 | -3.730         | -2.071 | 0.148  |
| 1 | -0.661          | 1.640  | -2.513 | 1 | -2.630         | -1.241 | 1.261  |
| 1 | 3.973           | -0.840 | 2.049  | 1 | -5.618         | -0.885 | 0.884  |
| 1 | -0.329          | 3.666  | 1.971  | 1 | -5.618         | 0.885  | 0.884  |
| 1 | 4.243           | -2.150 | -2.024 | 1 | -4.657         | 0.000  | 2.091  |
| 1 | -1.433          | 3.963  | -2.161 | 1 | 0.585          | -1.880 | -2.396 |
| 1 | 5.244           | -1.955 | 0.248  | 1 | 0.585          | 1.880  | -2.396 |
| 1 | -1.291          | 4.975  | 0.111  | 1 | 1.835          | -1.162 | 2.926  |
| 1 | -3.189          | -4.004 | 0.551  | 1 | 1.835          | 1.162  | 2.926  |
| 1 | -4.492          | -2.898 | 1.043  | 1 | 2.726          | -3.085 | 1.886  |
| 1 | -3.139          | -3.238 | 2.146  | 1 | 2.726          | 3.085  | 1.886  |
| 1 | -3.868          | -0.394 | 1.224  | 1 | 1.773          | -4.042 | -2.184 |
| 1 | -2.152          | 0.014  | 0.964  | 1 | 1.773          | 4.042  | -2.184 |
| 1 | -2.617          | -0.956 | 2.358  | 1 | 2.825          | -4.661 | -0.015 |
|   |                 |        |        | 1 | 2.825          | 4.661  | -0.015 |
|   | Benzphetamine   |        |        |   | Amitriptyline  |        |        |
| 7 | 0.714           | -0.435 | 0.275  | 7 | -2.439         | -1.477 | 0.709  |
| 6 | -0.684          | -0.484 | -0.182 | 6 | 1.524          | 0.954  | 1.876  |
| 6 | -1.627          | -0.033 | 0.943  | 6 | 0.009          | 0.786  | 1.795  |
| 6 | 1.664           | -0.472 | -0.827 | 6 | 0.471          | -0.407 | -0.747 |
| 6 | -1.119          | -1.823 | -0.774 | 6 | 2.375          | 0.266  | 0.830  |
| 6 | -3.021          | 0.246  | 0.456  | 6 | -0.565         | 1.435  | 0.574  |
| 6 | 1.050           | -1.428 | 1.281  | 6 | 1.901          | -0.360 | -0.341 |
| 6 | 3.039           | 0.004  | -0.433 | 6 | -0.319         | 0.848  | -0.675 |
| 6 | -3.294          | 1.402  | -0.282 | 6 | -0.068         | -1.559 | -1.182 |
| 6 | -4.066          | -0.649 | 0.691  | 6 | -1.492         | -1.799 | -1.565 |
| 6 | 3.198           | 1.088  | 0.433  | 6 | 3.751          | 0.236  | 1.089  |
| 6 | 4.178           | -0.611 | -0.952 | 6 | -1.325         | 2.602  | 0.641  |
| 6 | -4.572          | 1.655  | -0.768 | 6 | 2.832          | -0.978 | -1.194 |
| 6 | -5.347          | -0.401 | 0.207  | 6 | -0.832         | 1.447  | -1.828 |
| 6 | 4.466           | 1.548  | 0.765  | 6 | -2.295         | -2.401 | -0.408 |
| 6 | 5.449           | -0.149 | -0.626 | 6 | 4.656          | -0.379 | 0.239  |
| 6 | -5.603          | 0.753  | -0.526 | 6 | -1.842         | 3.188  | -0.509 |
| 6 | 5.597           | 0.933  | 0.234  | 6 | 4.189          | -0.996 | -0.917 |
| 1 | -0.748          | 0.274  | -0.975 | 6 | -1.593         | 2.609  | -1.749 |
| 1 | -1.195          | 0.864  | 1.400  | 6 | -2.793         | -2.169 | 1.931  |
| 1 | -1.665          | -0.801 | 1.724  | 6 | -3.394         | -0.420 | 0.430  |
| 1 | 1.270           | 0.178  | -1.620 | 1 | 1.865          | 0.606  | 2.858  |
| 1 | 1.754           | -1.480 | -1.278 | 1 | 1.758          | 2.028  | 1.858  |
| 1 | -2.120          | -1.749 | -1.205 | 1 | -0.441         | 1.221  | 2.694  |
| 1 | -1.150          | -2.606 | -0.009 | 1 | -0.254         | -0.279 | 1.789  |
| 1 | -0.441          | -2.155 | -1.565 | 1 | 0.569          | -2.445 | -1.164 |
| 1 | 0.359           | -1.370 | 2.124  | 1 | -1.540         | -2.498 | -2.408 |
| 1 | 2.054           | -1.228 | 1.663  | 1 | -1.975         | -0.879 | -1.904 |
| 1 | 1.042           | -2.464 | 0.897  | 1 | 4.111          | 0.708  | 2.000  |

|            |        |        |        |   |        |        |        |
|------------|--------|--------|--------|---|--------|--------|--------|
| 1          | -2.494 | 2.114  | -0.470 | 1 | -1.522 | 3.048  | 1.613  |
| 1          | -3.869 | -1.553 | 1.262  | 1 | 2.463  | -1.431 | -2.109 |
| 1          | 2.310  | 1.553  | 0.851  | 1 | -0.627 | 0.993  | -2.793 |
| 1          | 4.064  | -1.464 | -1.616 | 1 | -3.281 | -2.747 | -0.777 |
| 1          | -4.764 | 2.561  | -1.334 | 1 | -1.774 | -3.291 | -0.037 |
| 1          | -6.145 | -1.109 | 0.404  | 1 | 5.715  | -0.377 | 0.475  |
| 1          | 4.575  | 2.391  | 1.441  | 1 | -2.435 | 4.095  | -0.438 |
| 1          | 6.325  | -0.640 | -1.038 | 1 | 4.878  | -1.477 | -1.604 |
| 1          | -6.601 | 0.951  | -0.903 | 1 | -1.986 | 3.063  | -2.654 |
| 1          | 6.588  | 1.293  | 0.495  | 1 | -2.038 | -2.925 | 2.165  |
|            |        |        |        | 1 | -3.777 | -2.673 | 1.881  |
|            |        |        |        | 1 | -2.828 | -1.457 | 2.761  |
|            |        |        |        | 1 | -3.425 | 0.276  | 1.273  |
|            |        |        |        | 1 | -4.419 | -0.806 | 0.266  |
|            |        |        |        | 1 | -3.096 | 0.153  | -0.451 |
| Diphemanil |        |        |        |   |        |        |        |
| 7          | -3.632 | -0.120 | 0.184  |   |        |        |        |
| 6          | -2.824 | 1.166  | 0.063  |   |        |        |        |
| 6          | -2.707 | -1.257 | 0.595  |   |        |        |        |
| 6          | -1.626 | 1.011  | -0.851 |   |        |        |        |
| 6          | -1.516 | -1.423 | -0.334 |   |        |        |        |
| 6          | -0.744 | -0.138 | -0.448 |   |        |        |        |
| 6          | -4.319 | -0.437 | -1.106 |   |        |        |        |
| 6          | -4.672 | 0.062  | 1.241  |   |        |        |        |
| 6          | 0.585  | -0.026 | -0.209 |   |        |        |        |
| 6          | 1.461  | -1.204 | -0.005 |   |        |        |        |
| 6          | 1.269  | 1.290  | -0.142 |   |        |        |        |
| 6          | 2.390  | -1.208 | 1.044  |   |        |        |        |
| 6          | 2.420  | 1.522  | -0.904 |   |        |        |        |
| 6          | 1.426  | -2.303 | -0.871 |   |        |        |        |
| 6          | 0.822  | 2.300  | 0.718  |   |        |        |        |
| 6          | 3.228  | -2.297 | 1.244  |   |        |        |        |
| 6          | 3.079  | 2.743  | -0.838 |   |        |        |        |
| 6          | 2.278  | -3.385 | -0.682 |   |        |        |        |
| 6          | 1.491  | 3.516  | 0.798  |   |        |        |        |
| 6          | 3.174  | -3.388 | 0.382  |   |        |        |        |
| 6          | 2.616  | 3.743  | 0.013  |   |        |        |        |
| 1          | -2.510 | 1.407  | 1.083  |   |        |        |        |
| 1          | -3.525 | 1.934  | -0.274 |   |        |        |        |
| 1          | -3.331 | -2.153 | 0.648  |   |        |        |        |
| 1          | -2.375 | -1.007 | 1.606  |   |        |        |        |
| 1          | -1.089 | 1.960  | -0.854 |   |        |        |        |
| 1          | -1.974 | 0.864  | -1.885 |   |        |        |        |
| 1          | -1.856 | -1.786 | -1.314 |   |        |        |        |
| 1          | -0.904 | -2.225 | 0.083  |   |        |        |        |
| 1          | -4.983 | 0.389  | -1.359 |   |        |        |        |
| 1          | -3.585 | -0.574 | -1.895 |   |        |        |        |
| 1          | -4.896 | -1.352 | -0.977 |   |        |        |        |
| 1          | -5.250 | -0.857 | 1.333  |   |        |        |        |
| 1          | -4.181 | 0.287  | 2.186  |   |        |        |        |
| 1          | -5.326 | 0.886  | 0.957  |   |        |        |        |
| 1          | 2.449  | -0.348 | 1.705  |   |        |        |        |
| 1          | 2.794  | 0.737  | -1.555 |   |        |        |        |
| 1          | 0.751  | -2.291 | -1.722 |   |        |        |        |
| 1          | -0.037 | 2.111  | 1.357  |   |        |        |        |
| 1          | 3.933  | -2.289 | 2.069  |   |        |        |        |
| 1          | 3.962  | 2.911  | -1.445 |   |        |        |        |
| 1          | 2.251  | -4.221 | -1.373 |   |        |        |        |
| 1          | 1.142  | 4.282  | 1.483  |   |        |        |        |
| 1          | 3.839  | -4.232 | 0.531  |   |        |        |        |
| 1          | 3.140  | 4.691  | 0.074  |   |        |        |        |
